# Supplementary material for: Catalytic enantioselective construction of quaternary stereocenters by direct vinylogous Michael addition of deconjugated butenolides to nitroolefins
Source: Royal Society of Chemistry journal article supplement (doi:10.1039/c2cc31700a), 2012-01-01

**Catalytic enantioselective construction of quaternary stereocenter by  
direct vinylogous Michael addition of deconjugated butenolides to  
nitroolefins**

Madhu Sudan Manna, Vikas Kumar and Santanu Mukherjee\*

*Department of Organic Chemistry, Indian Institute of Science, Bangalore 560 012, INDIA*  
sm@orgchem.iisc.ernet.in

**SUPPORTING INFORMATION: PART B**

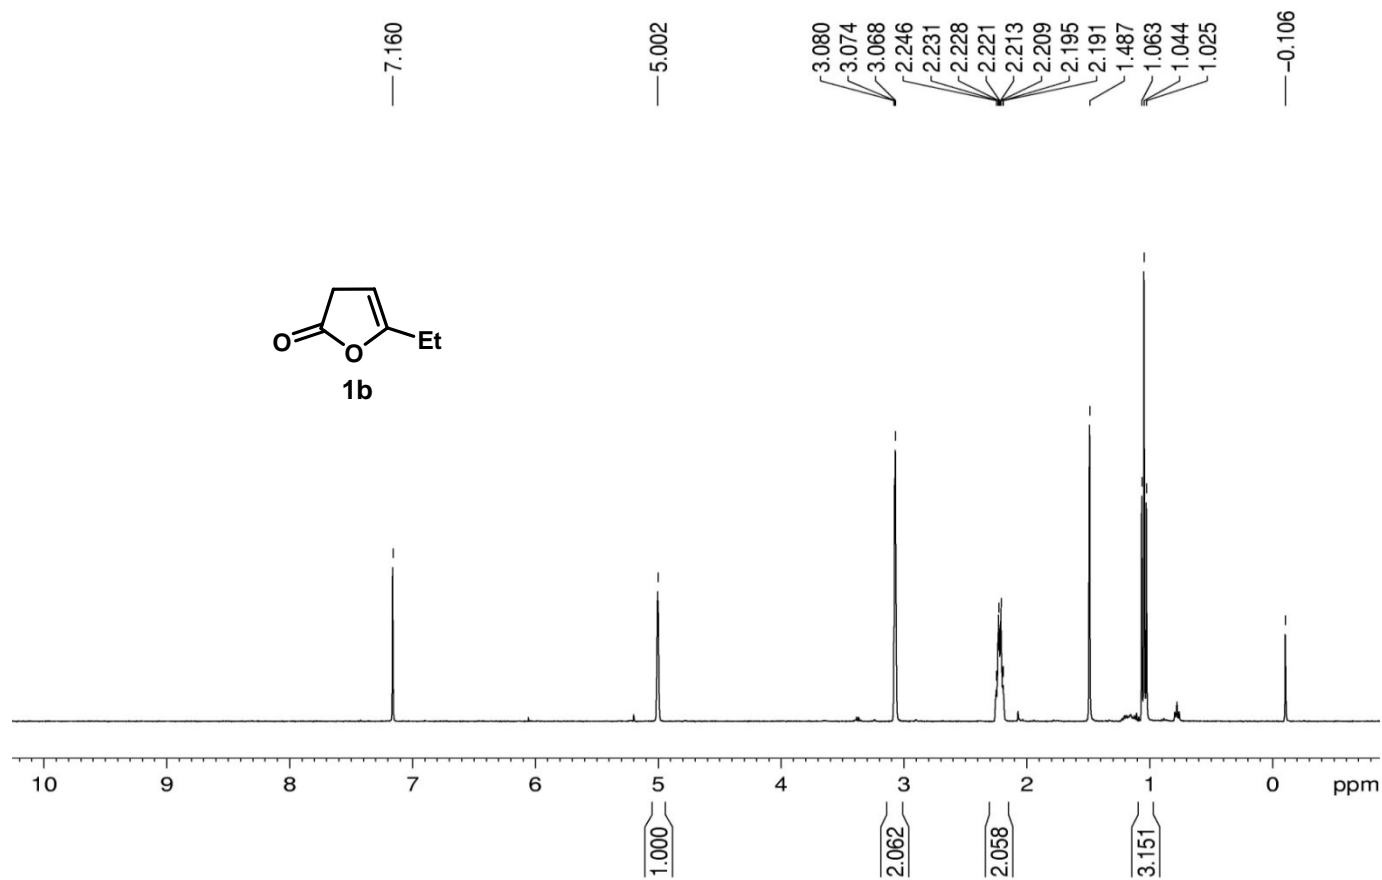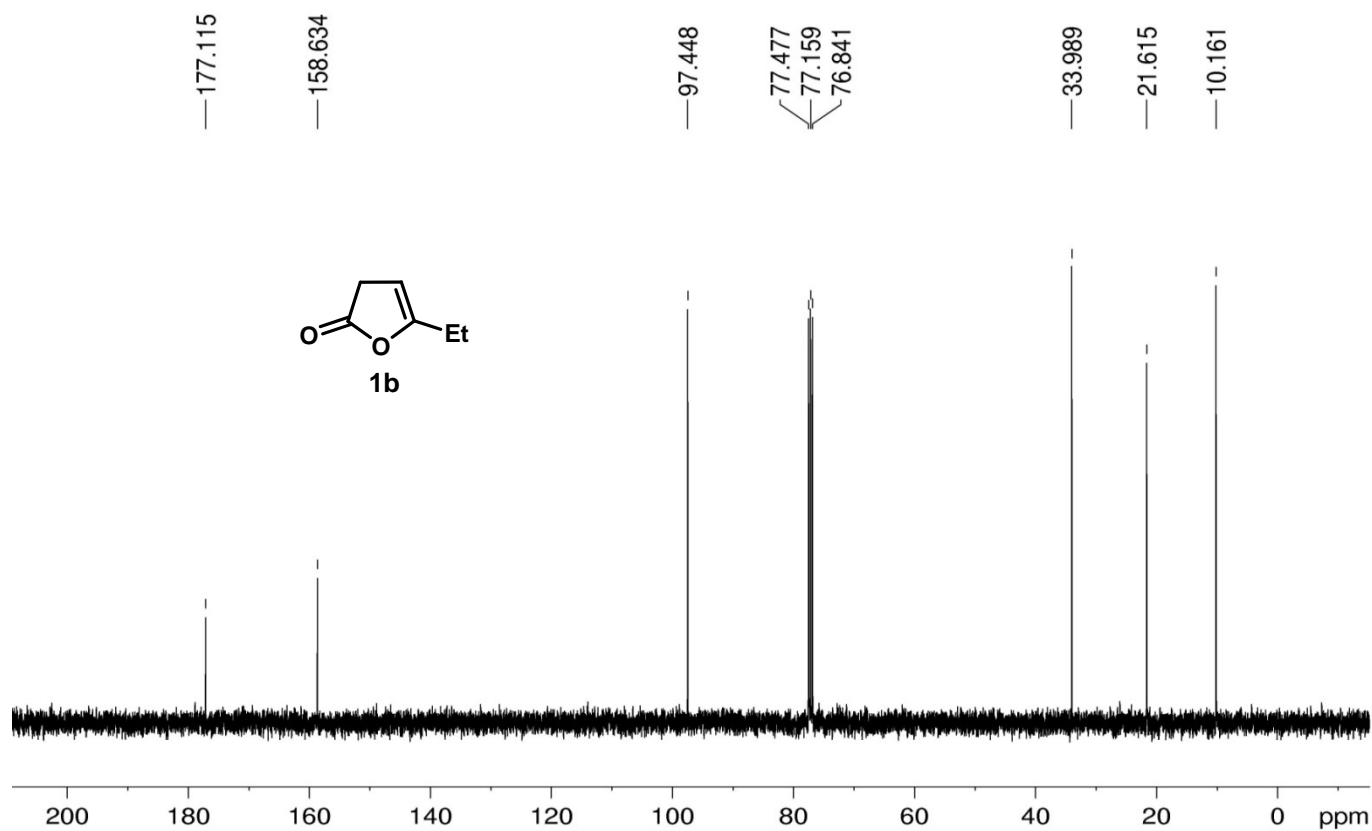

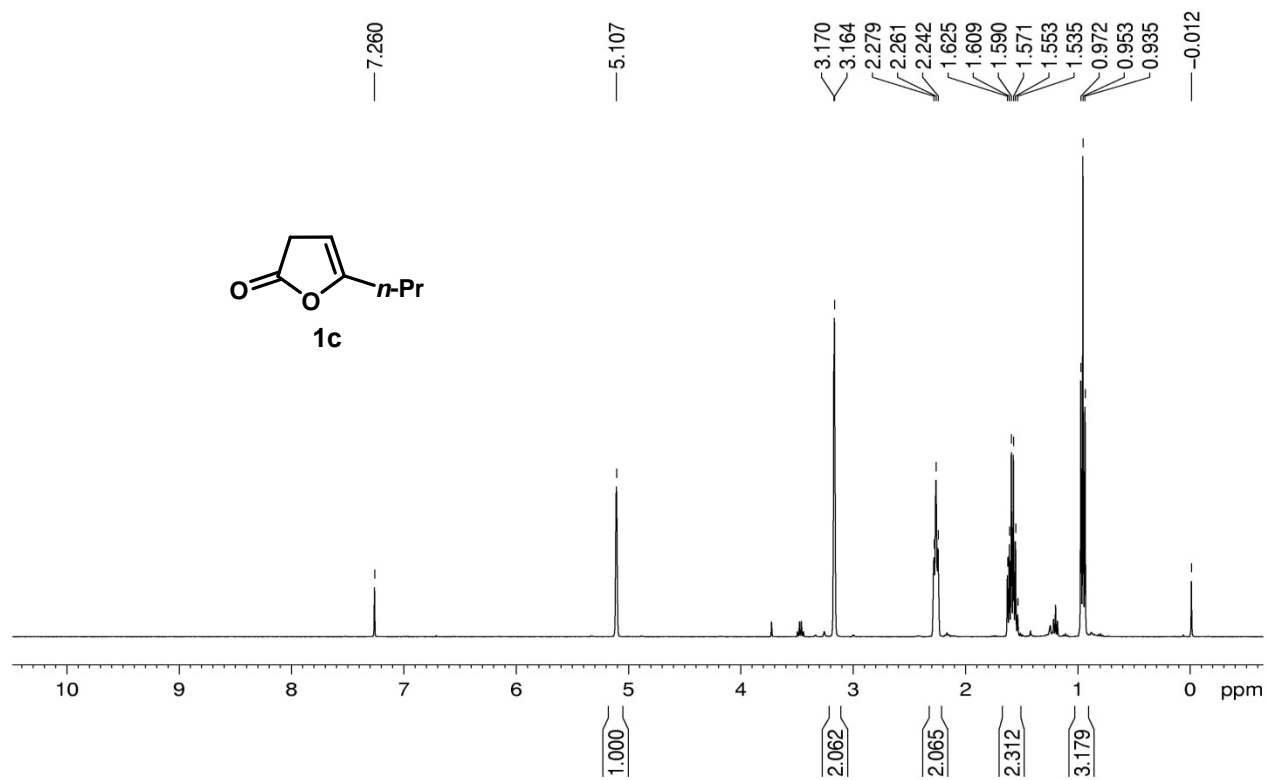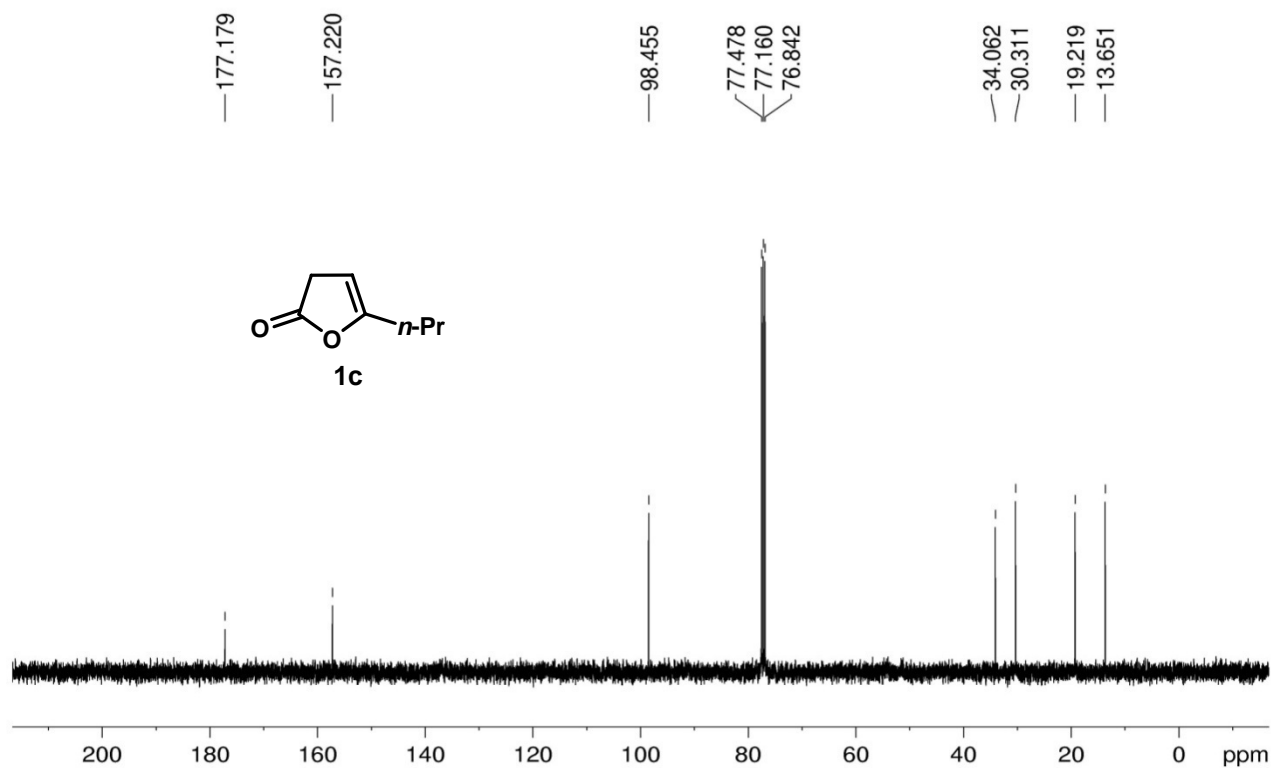

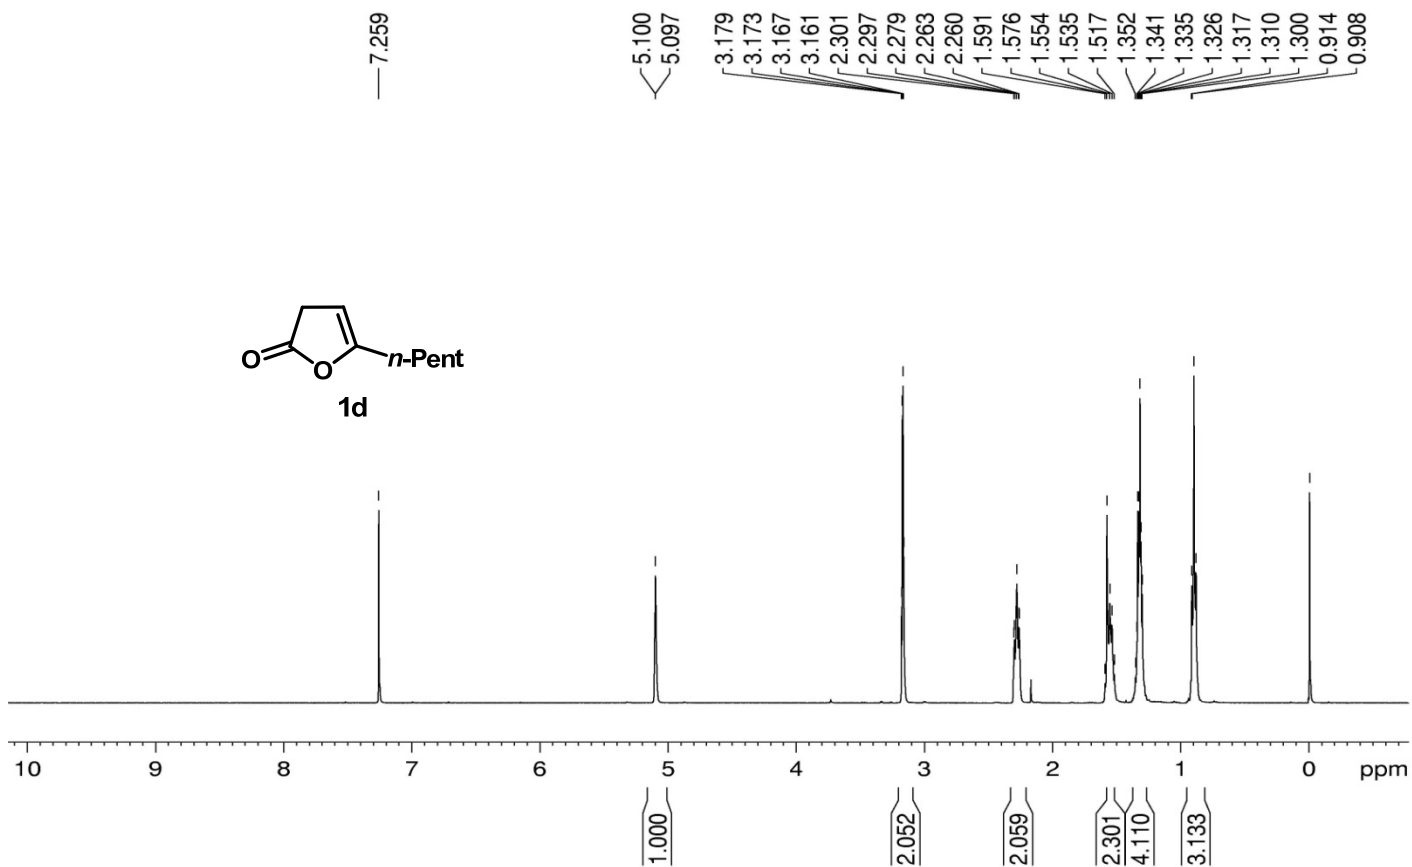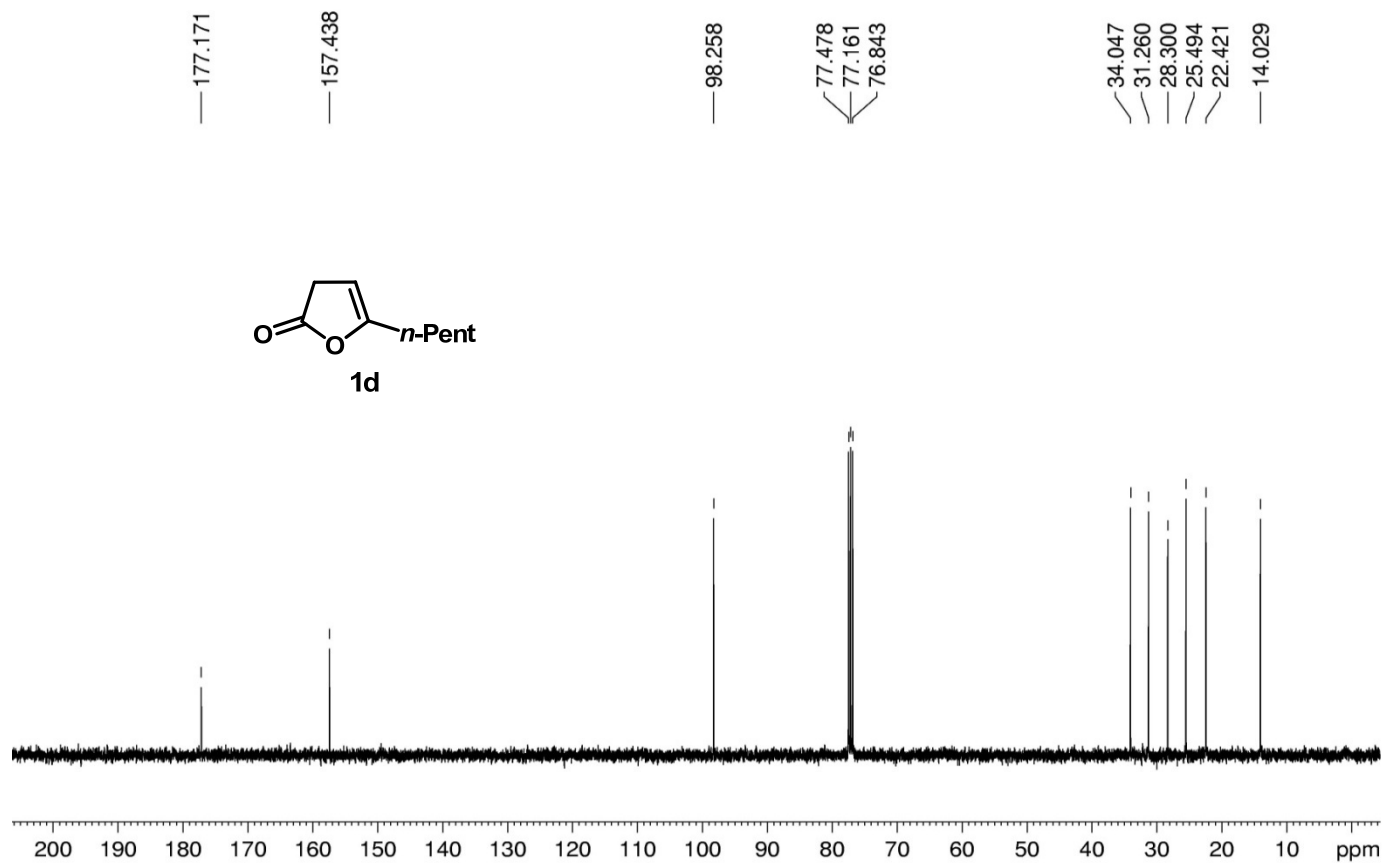

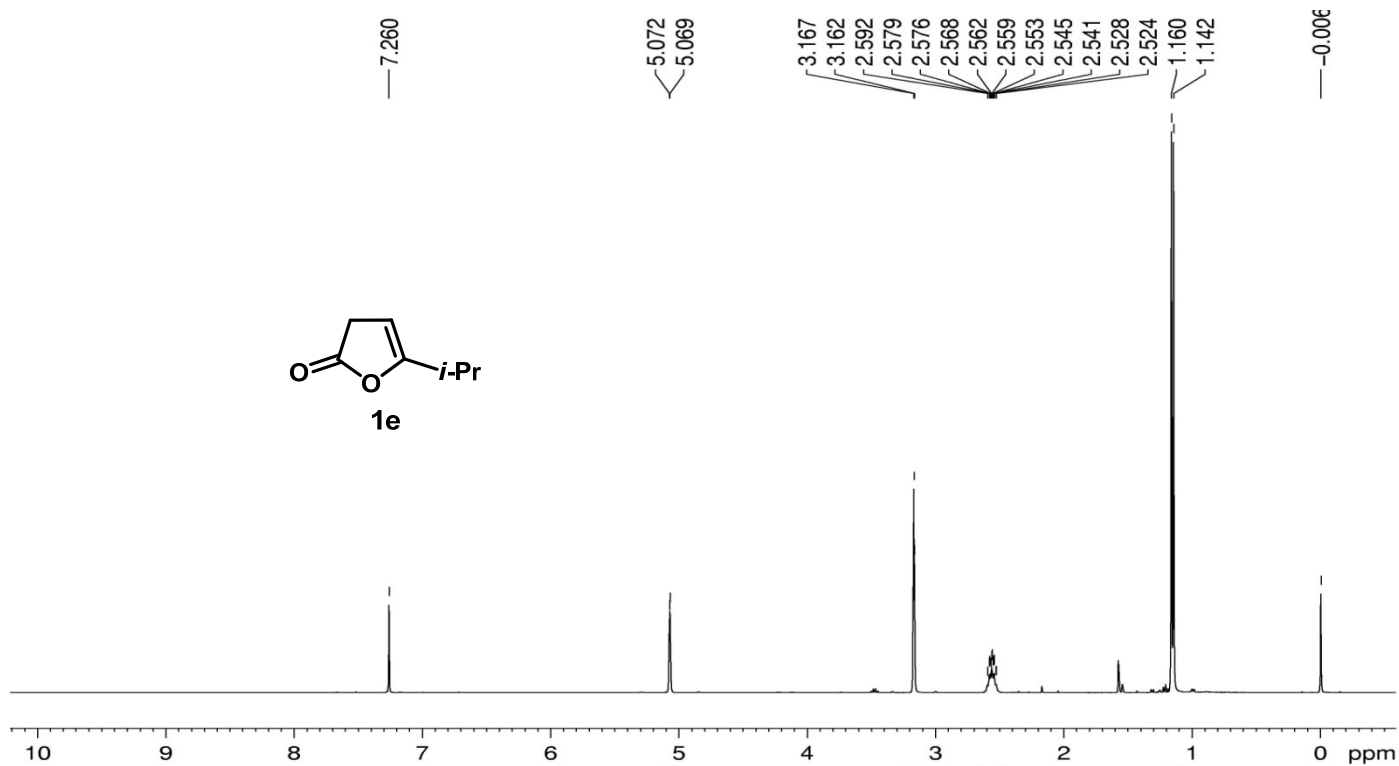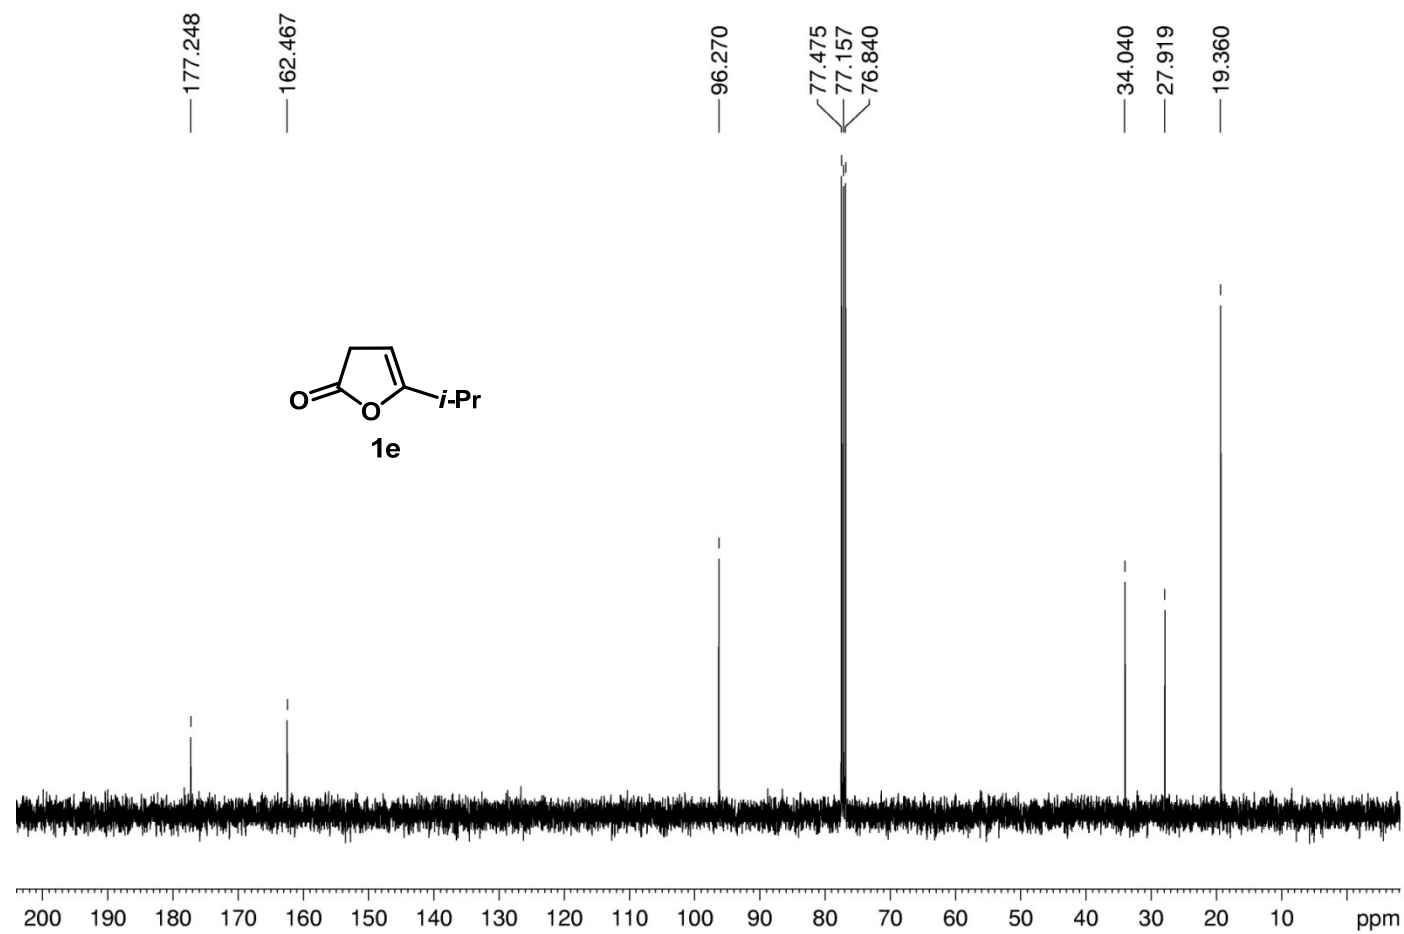

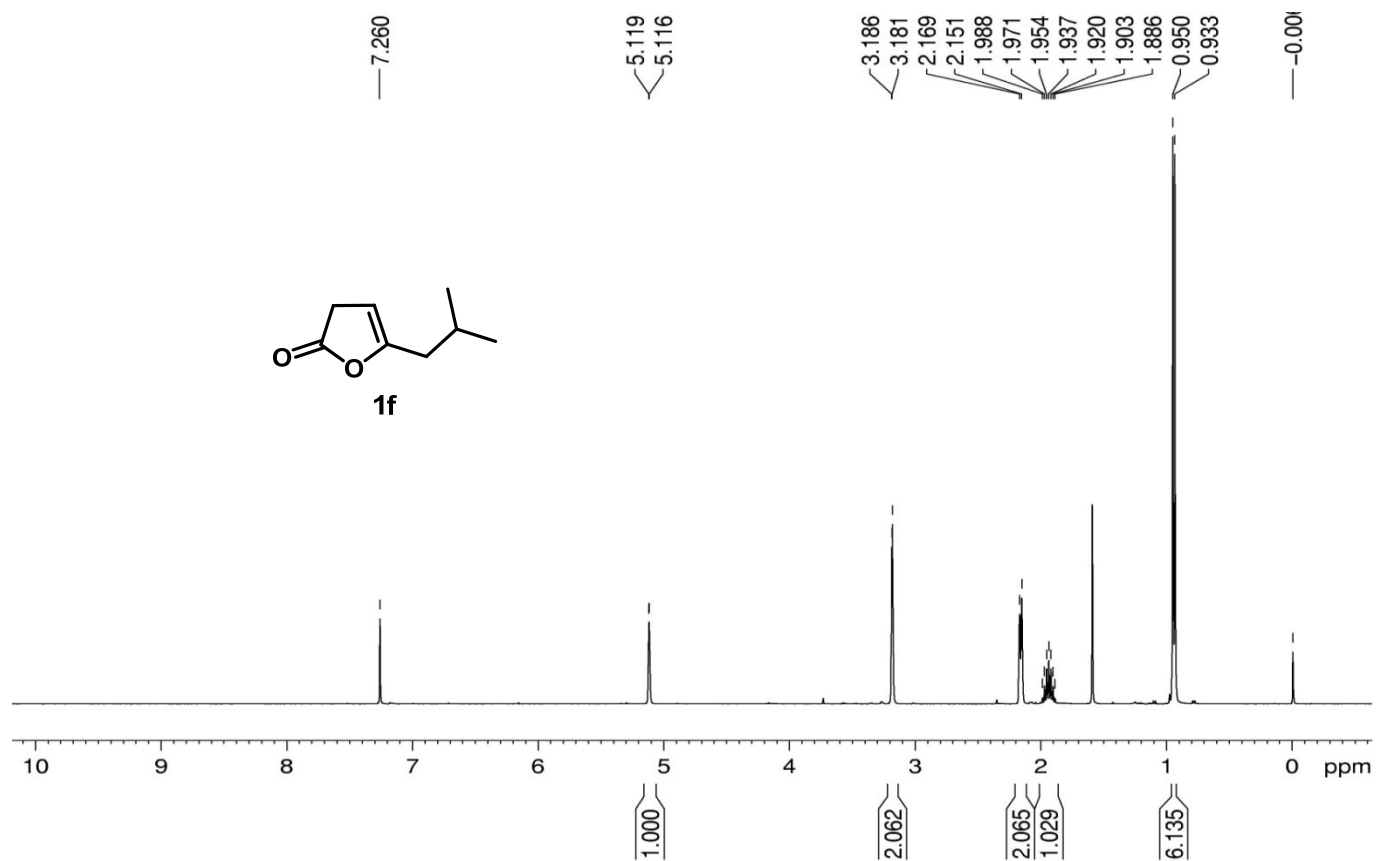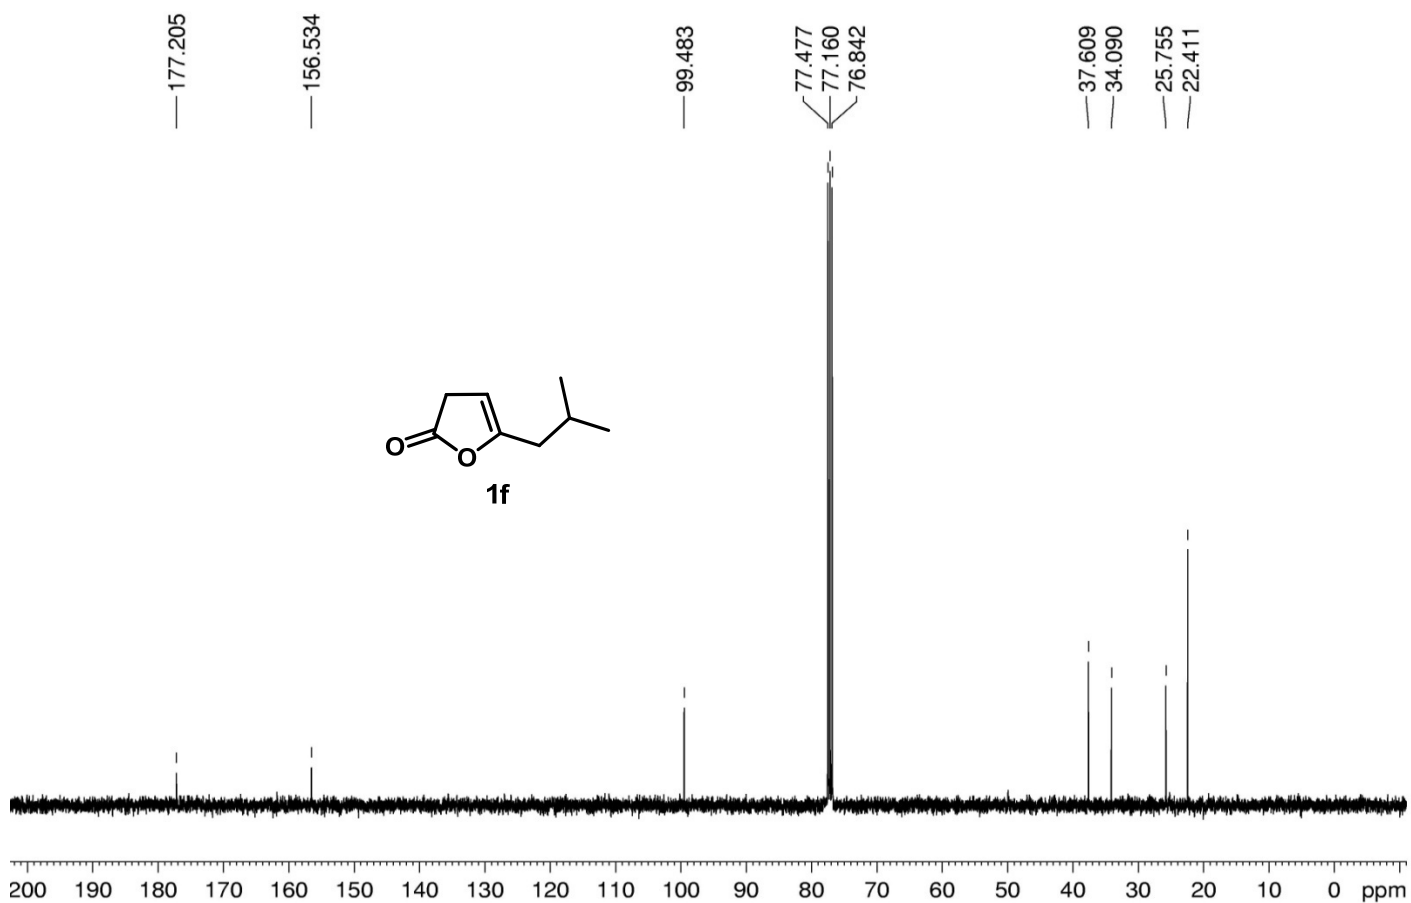

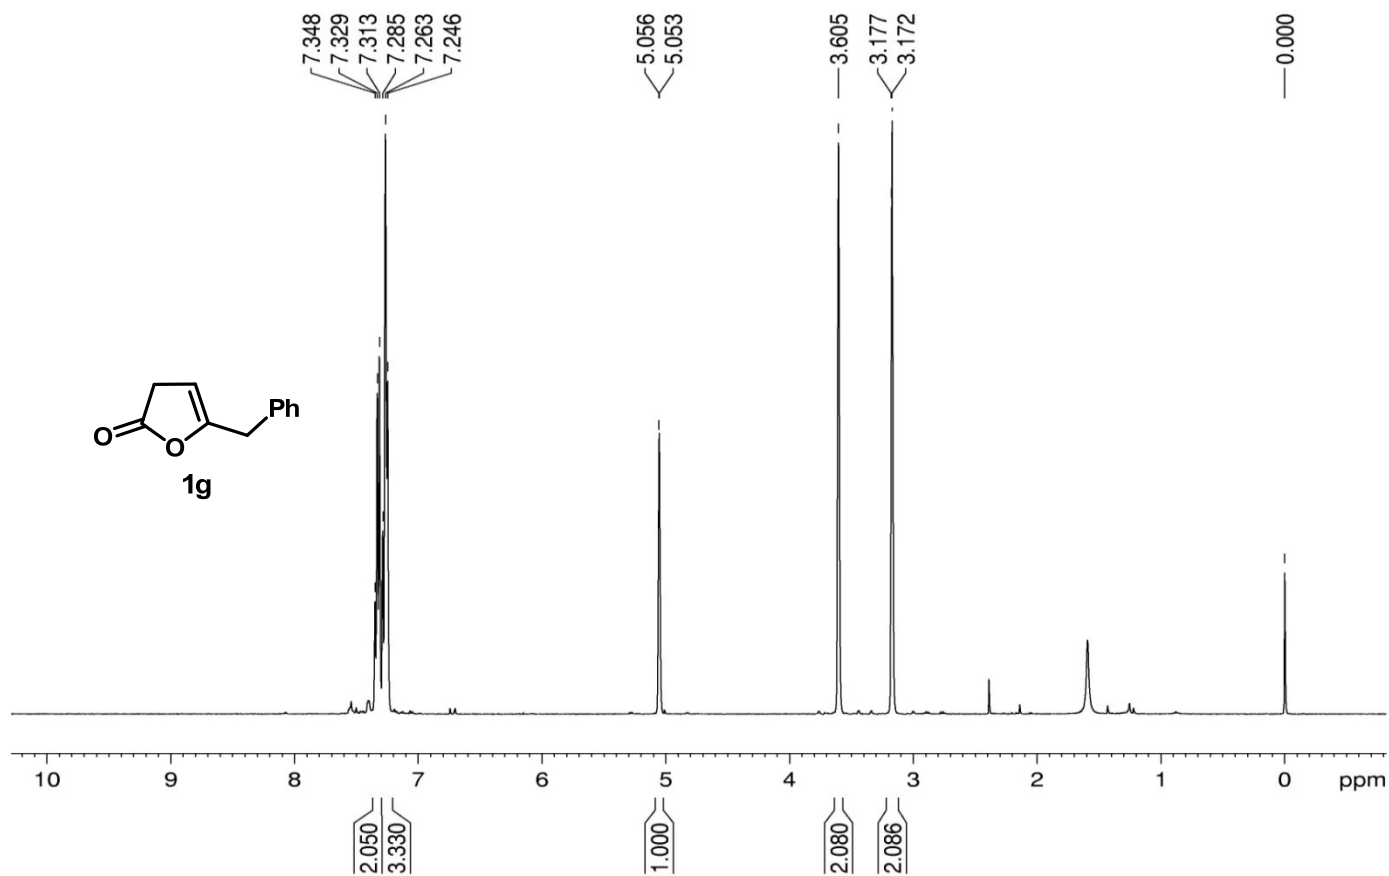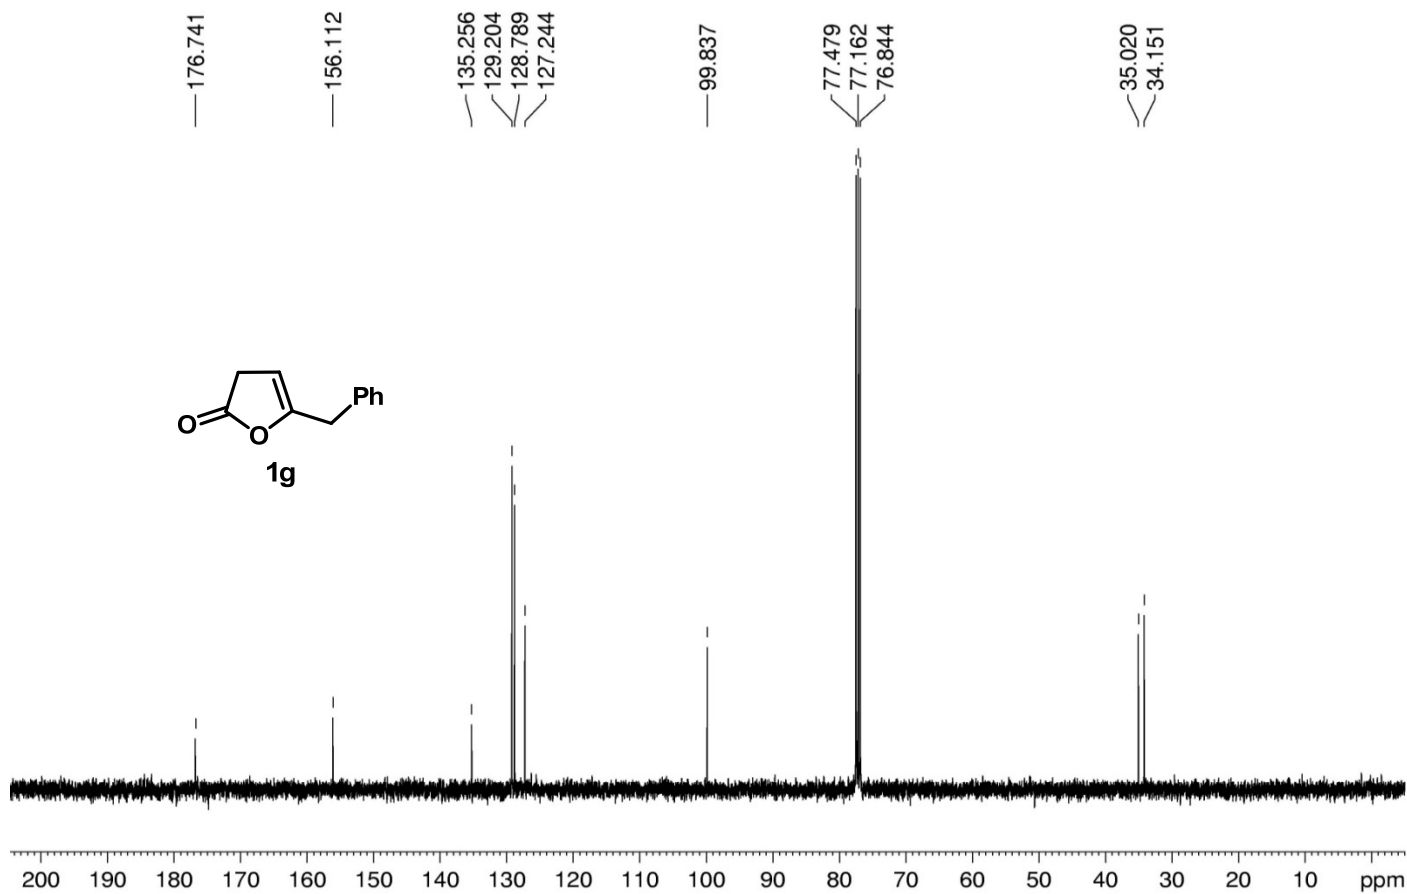

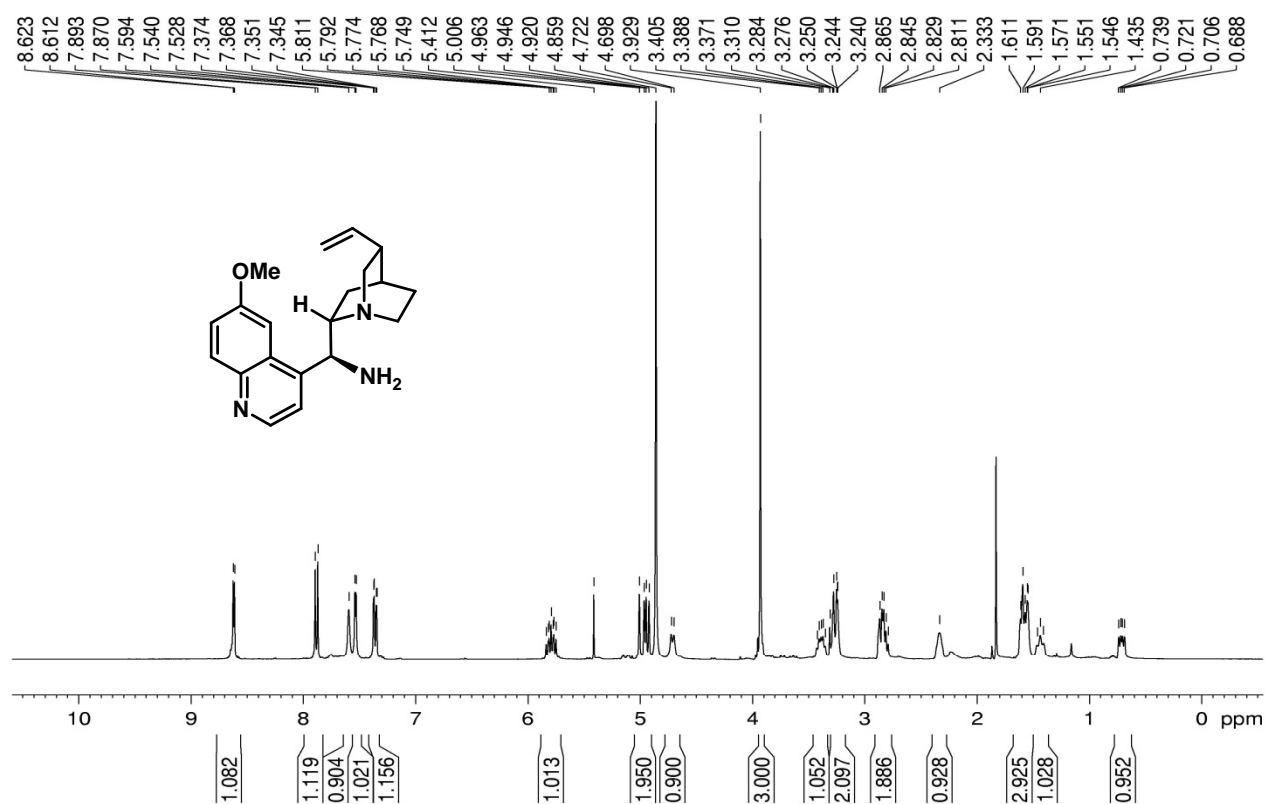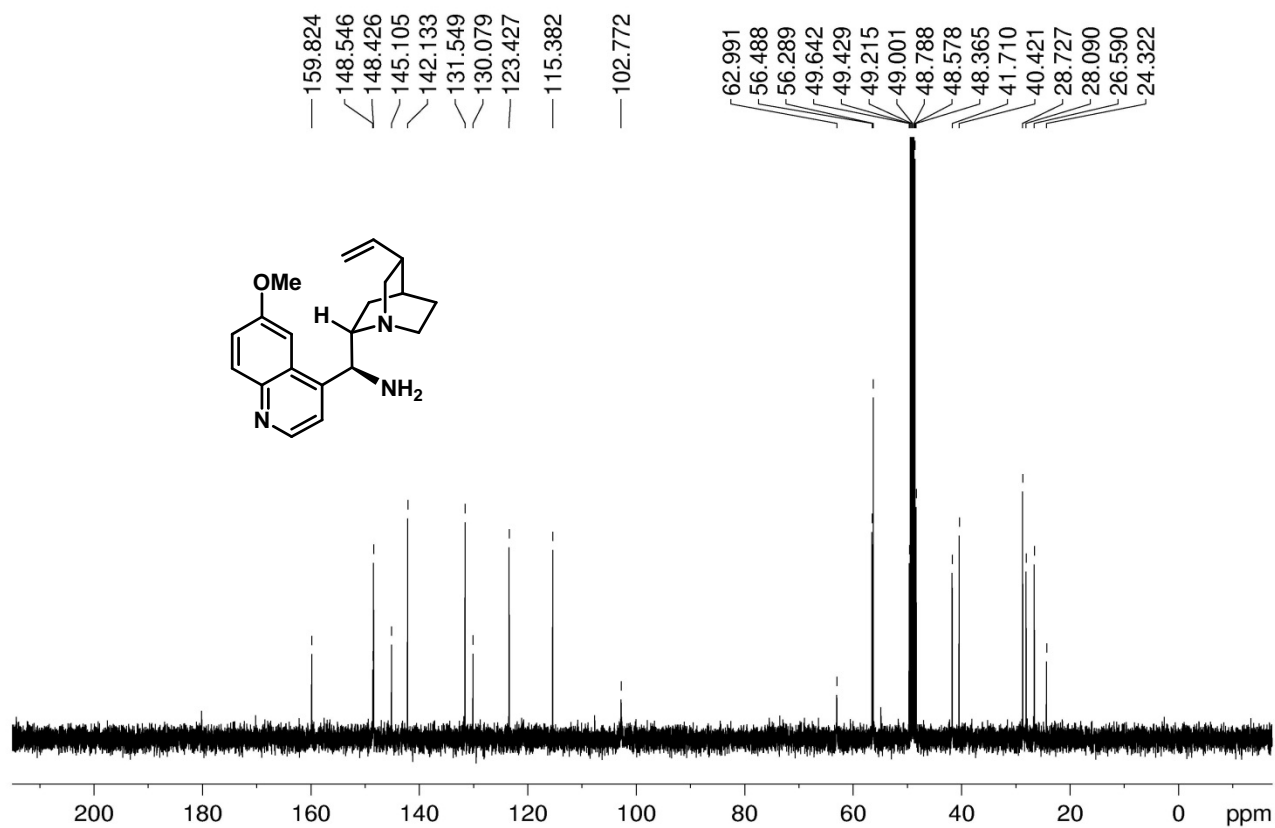

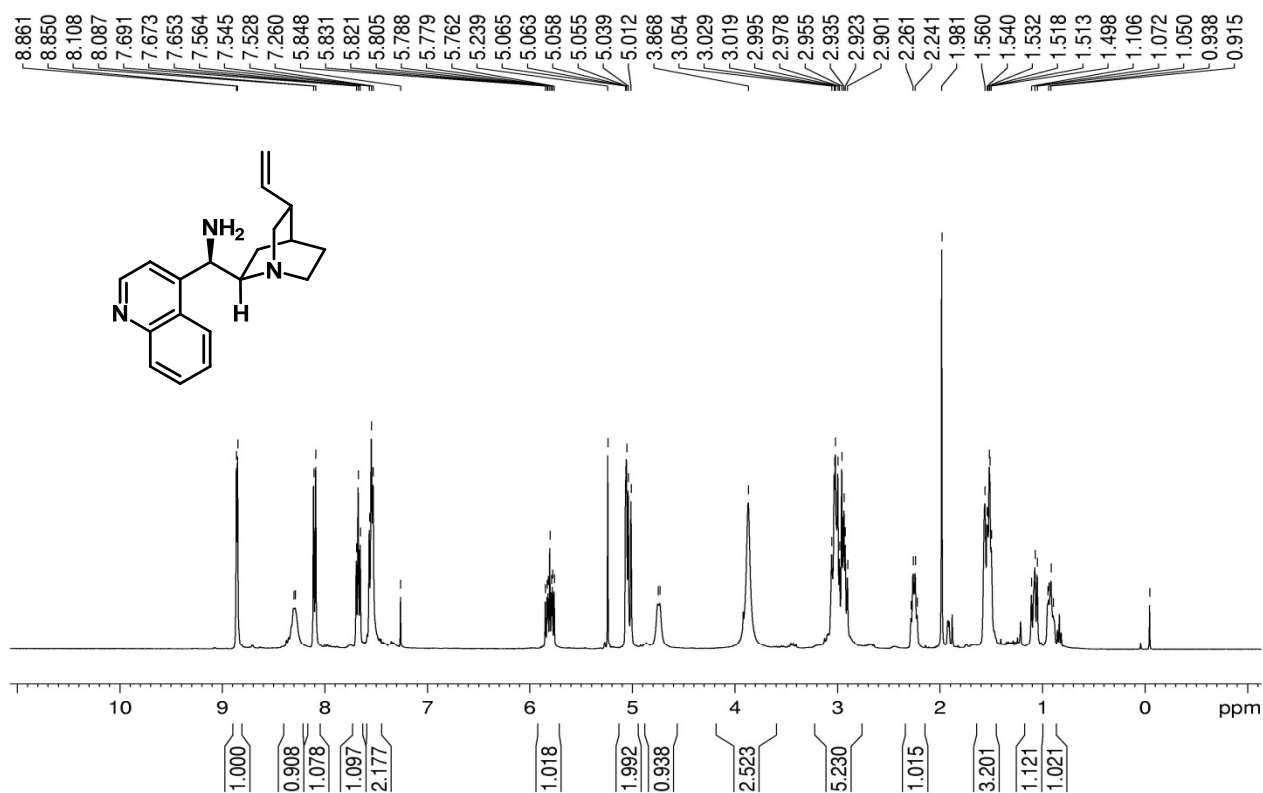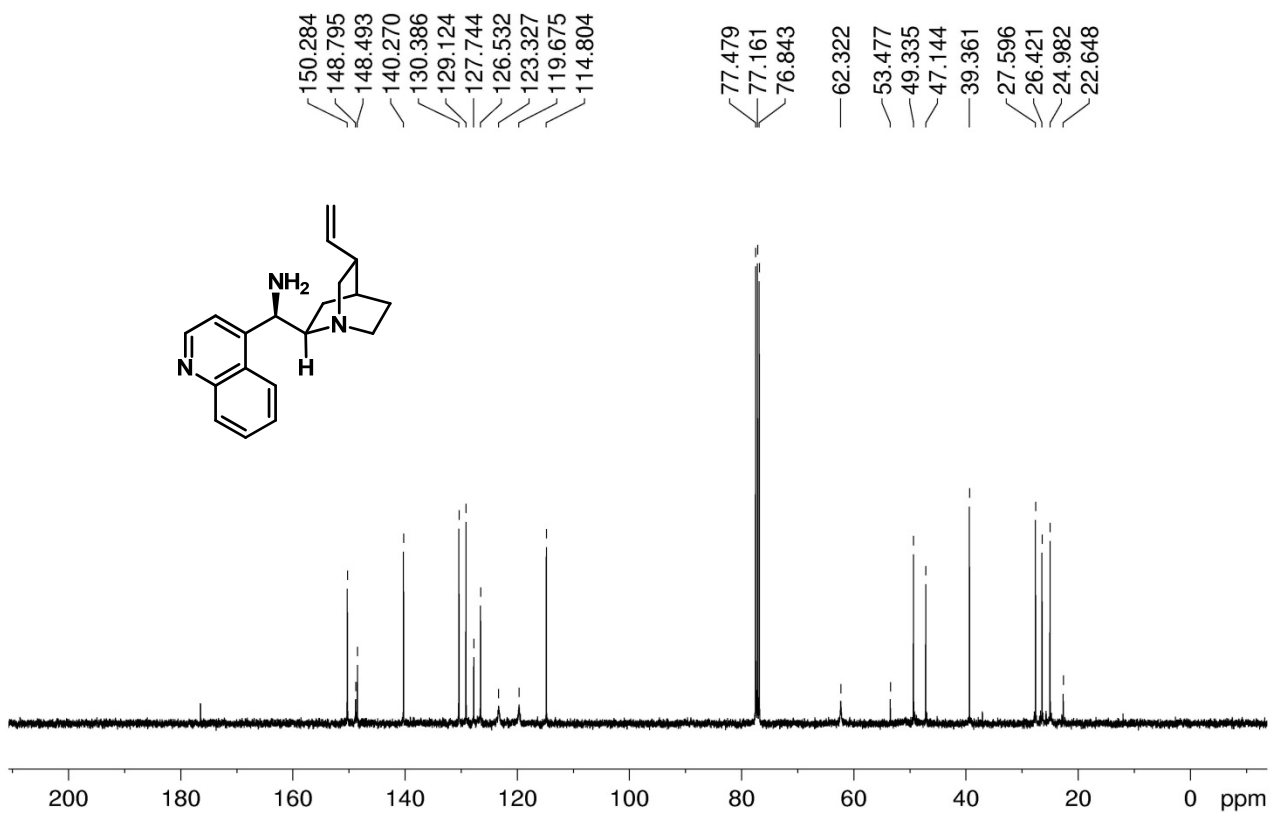

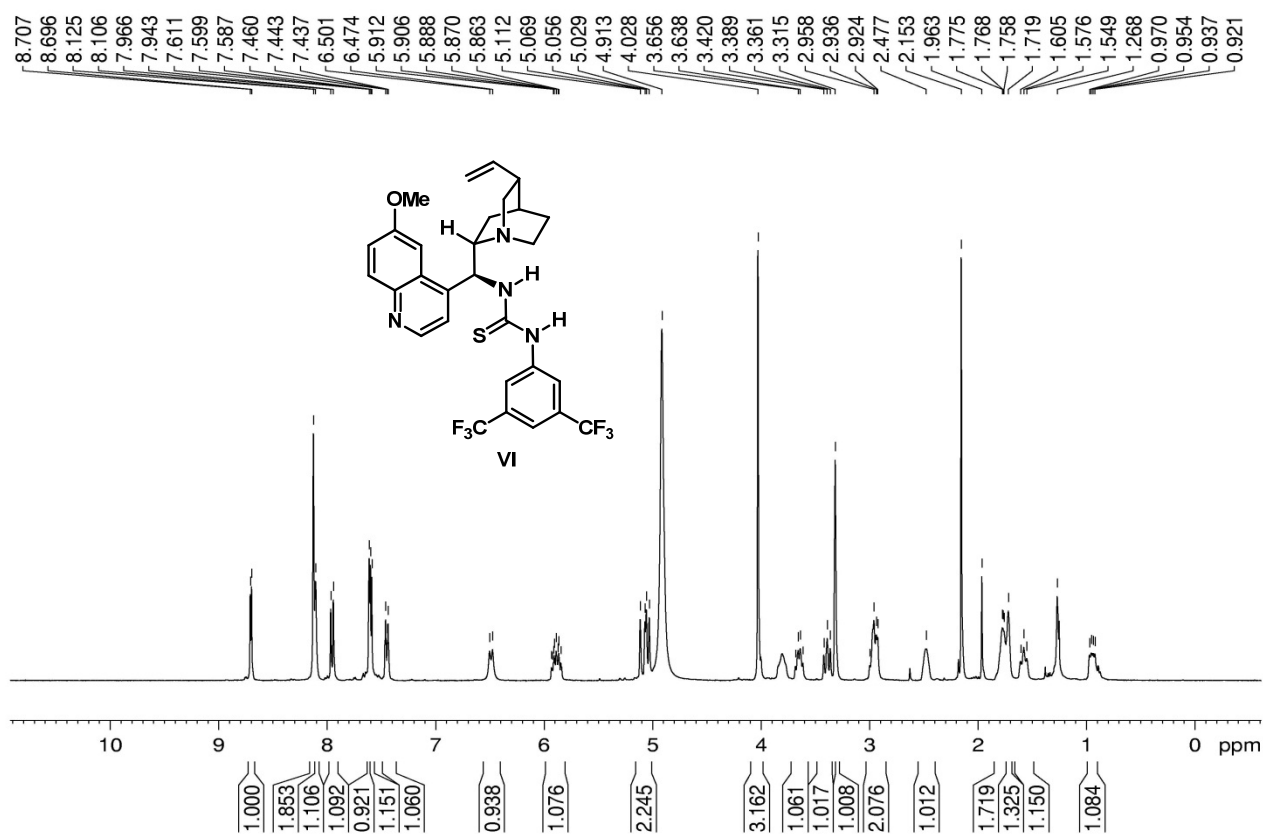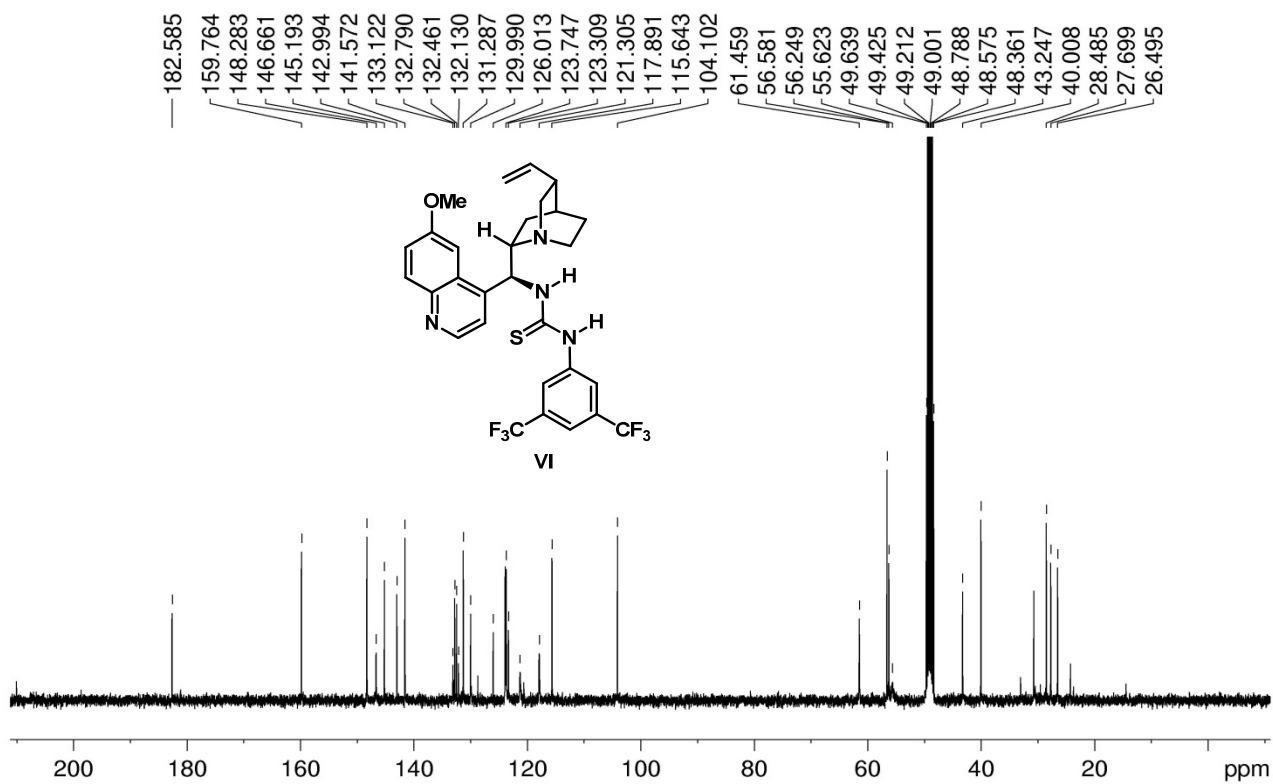

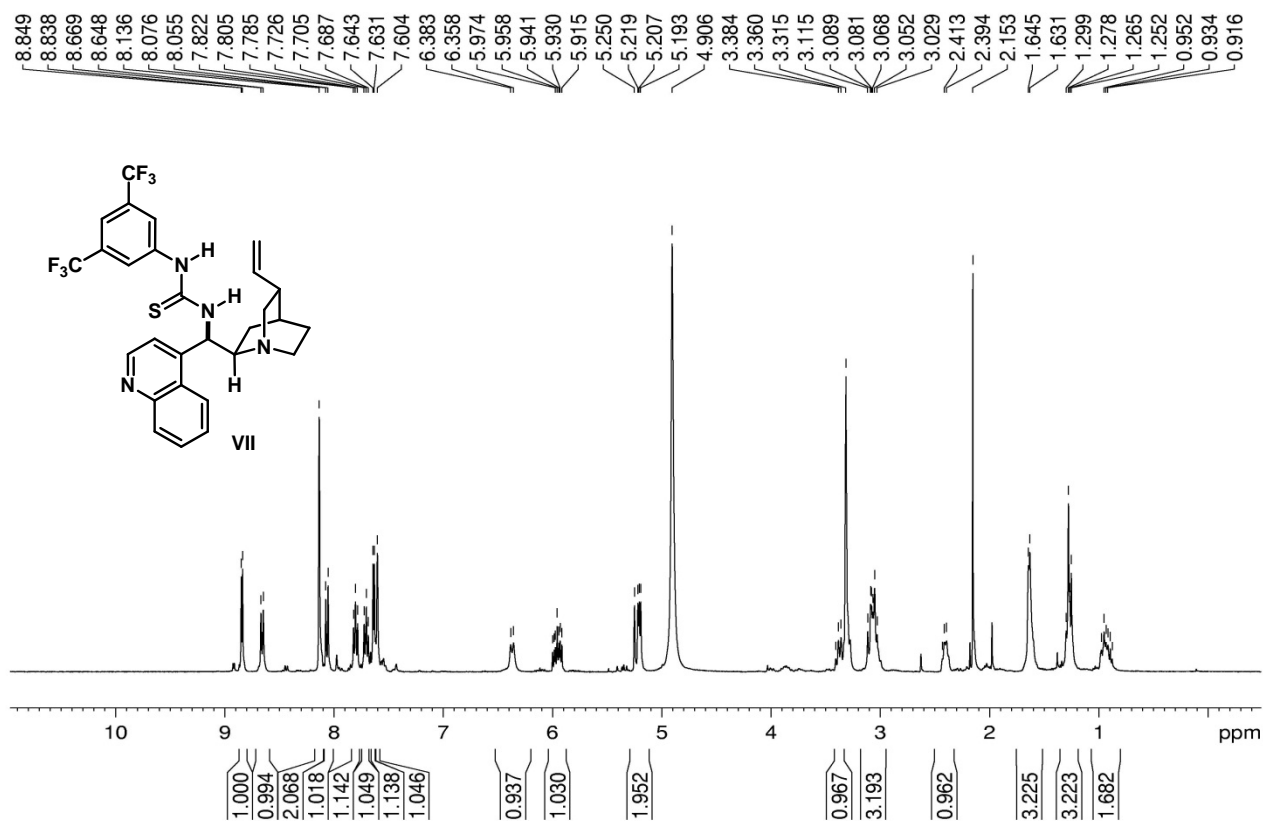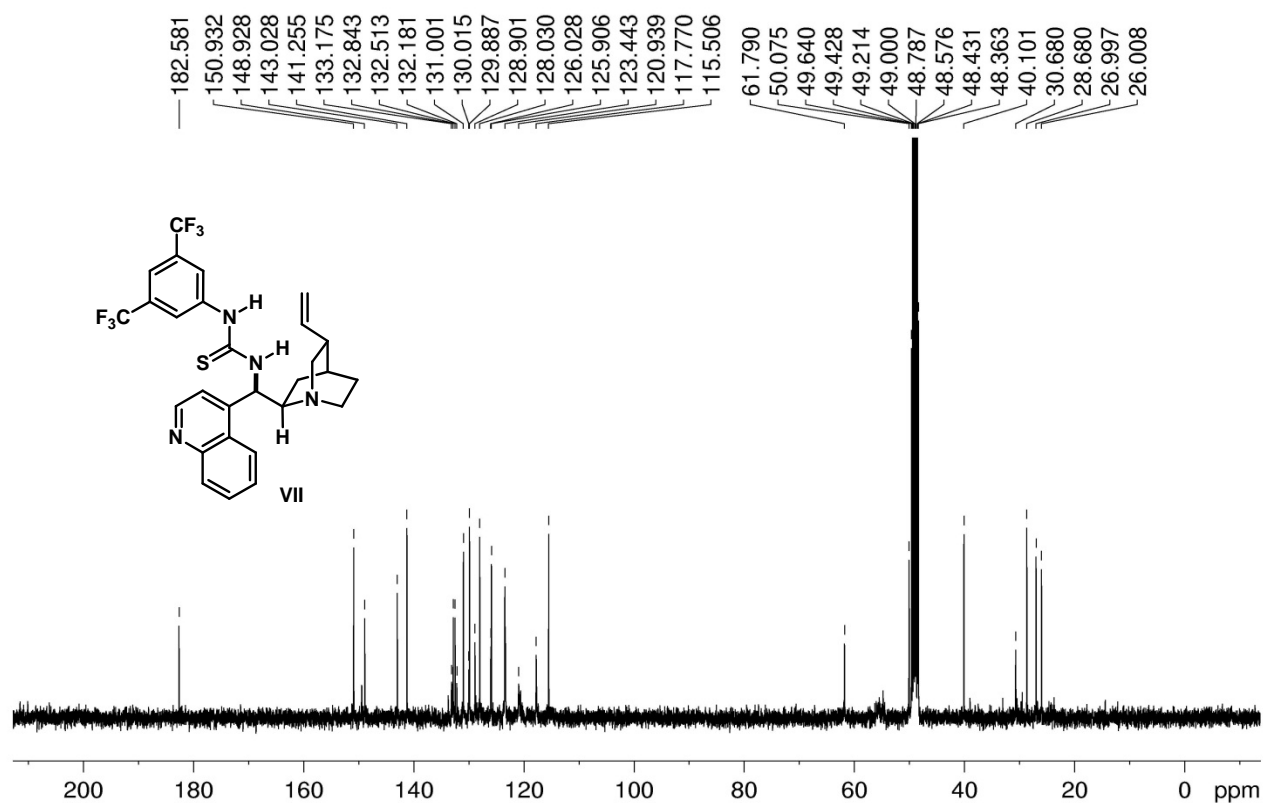

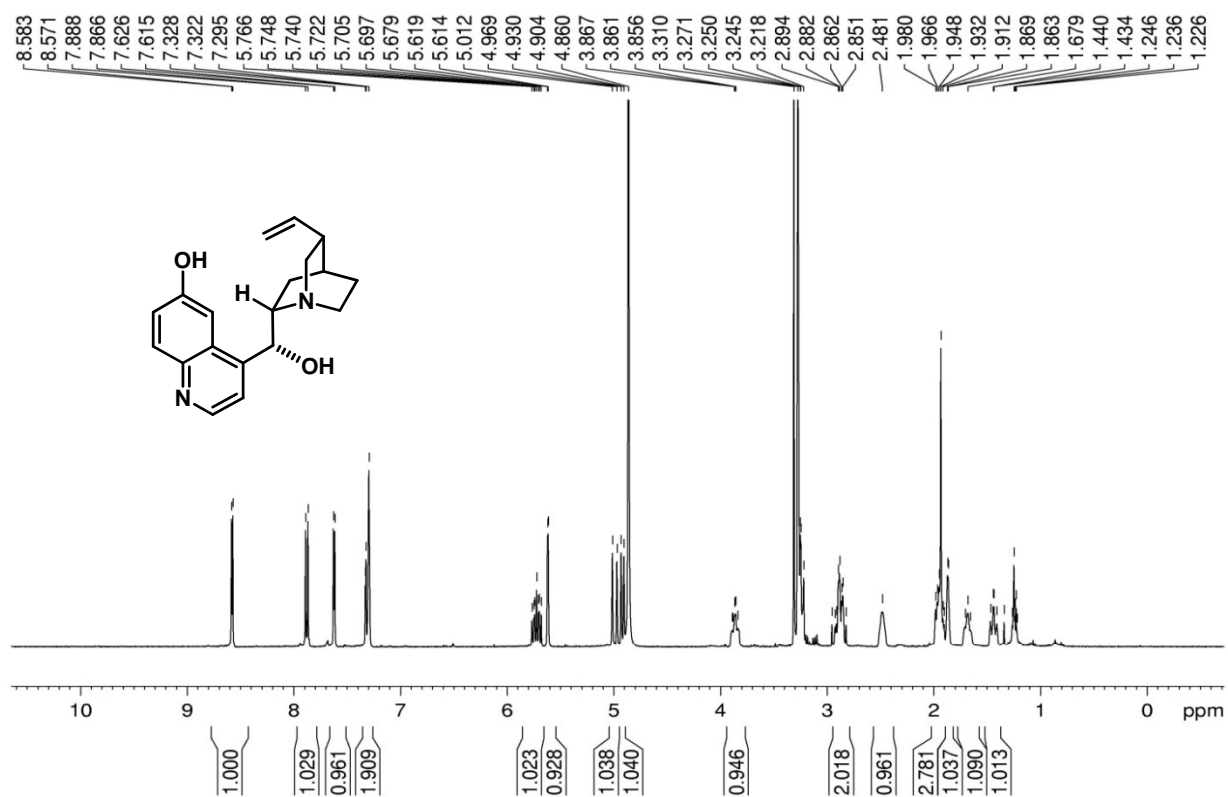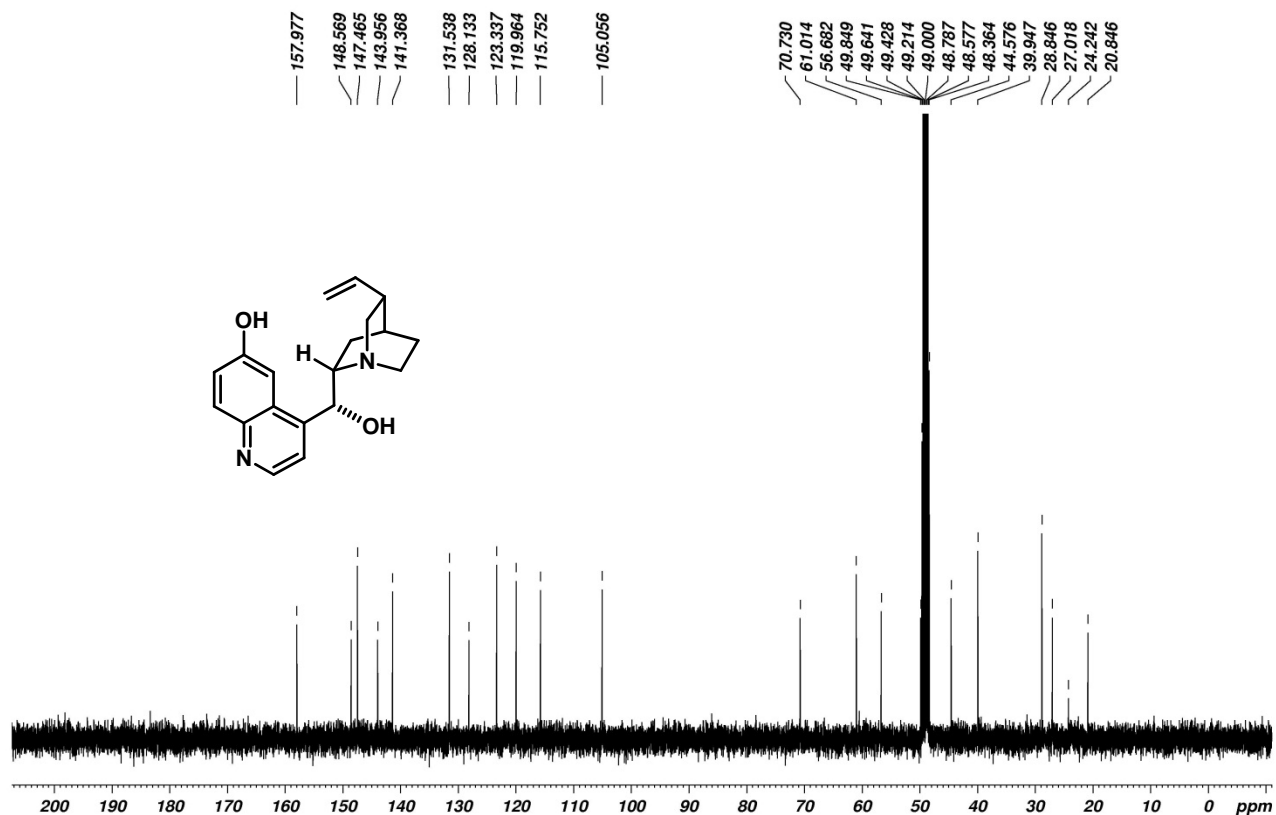

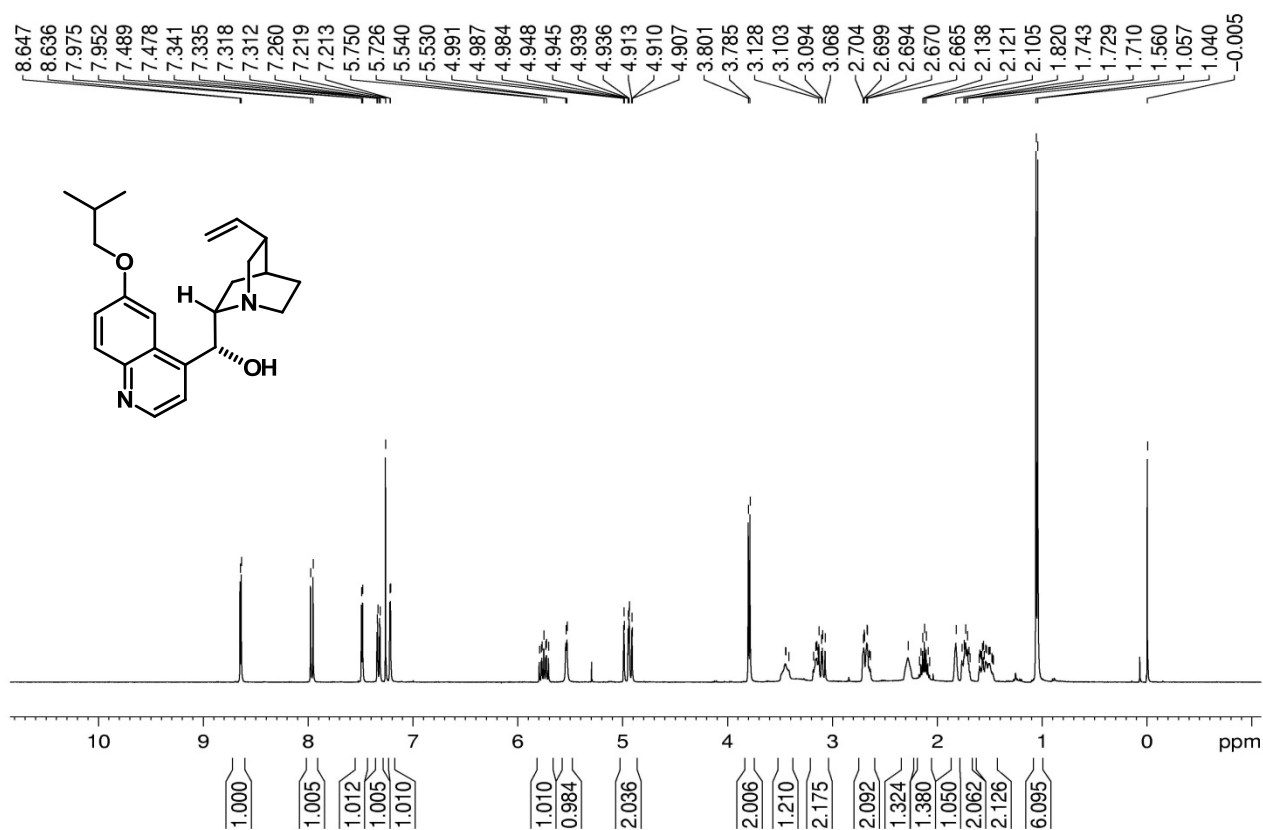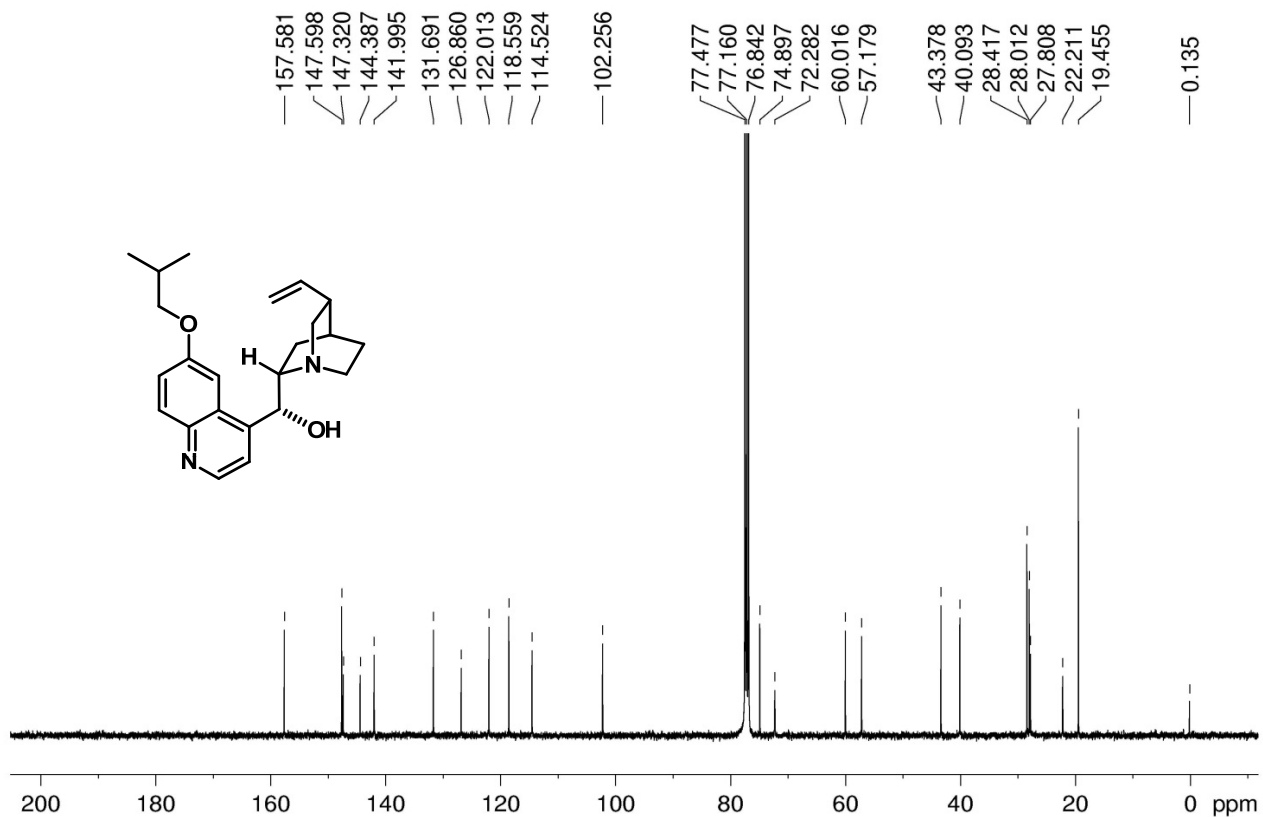

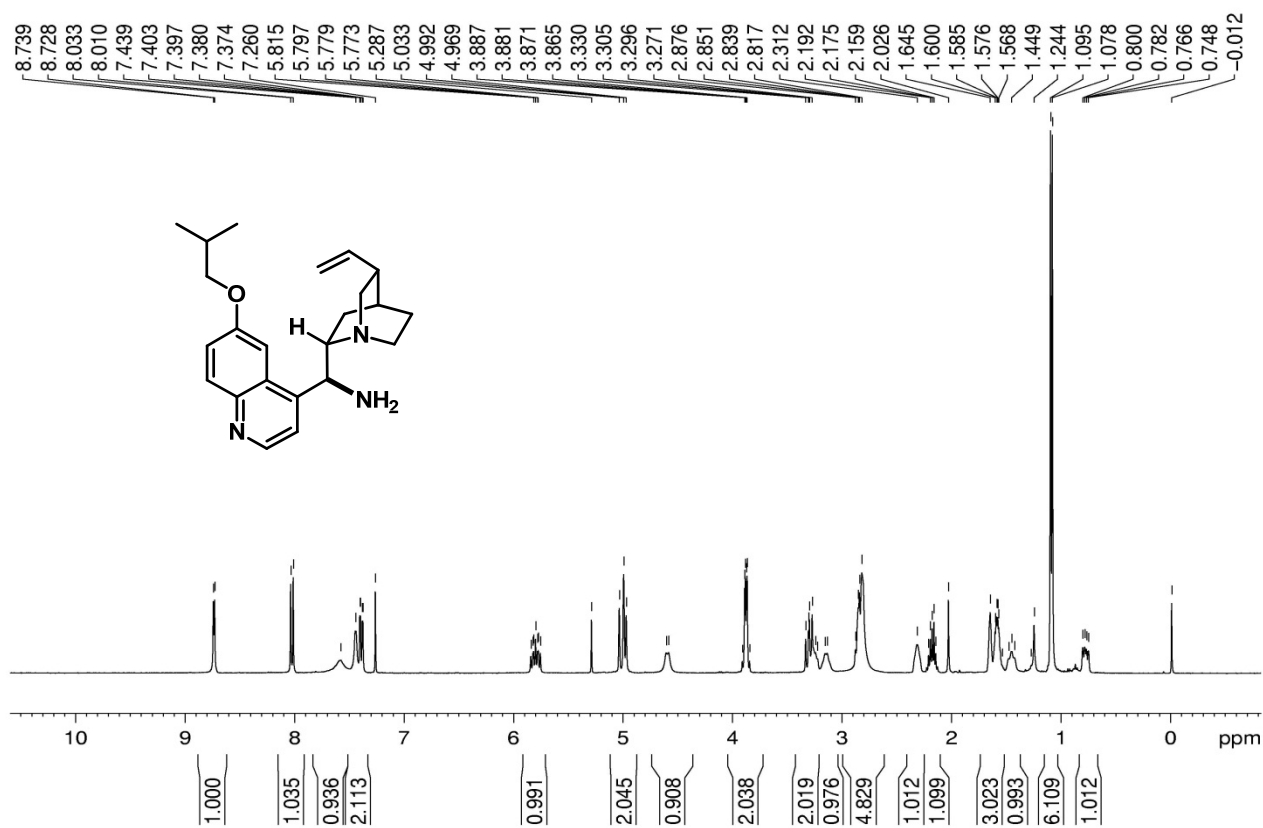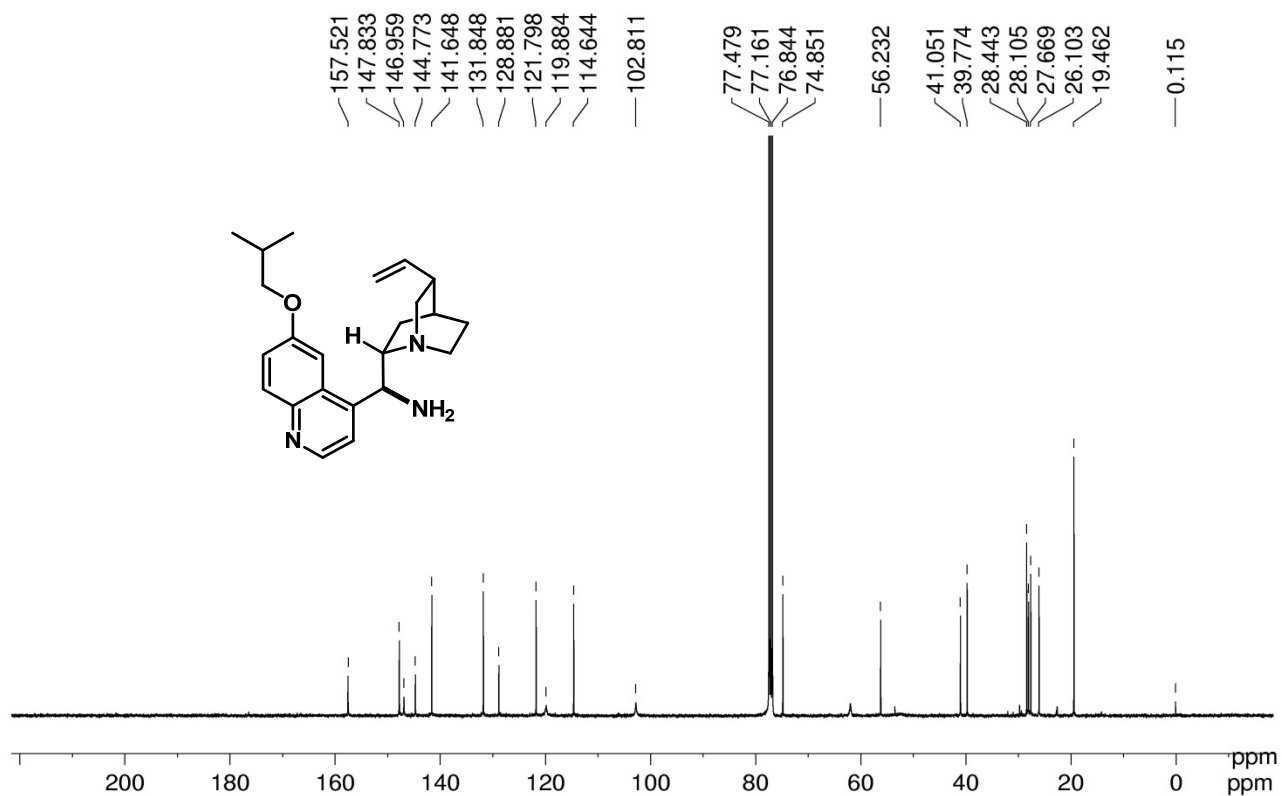

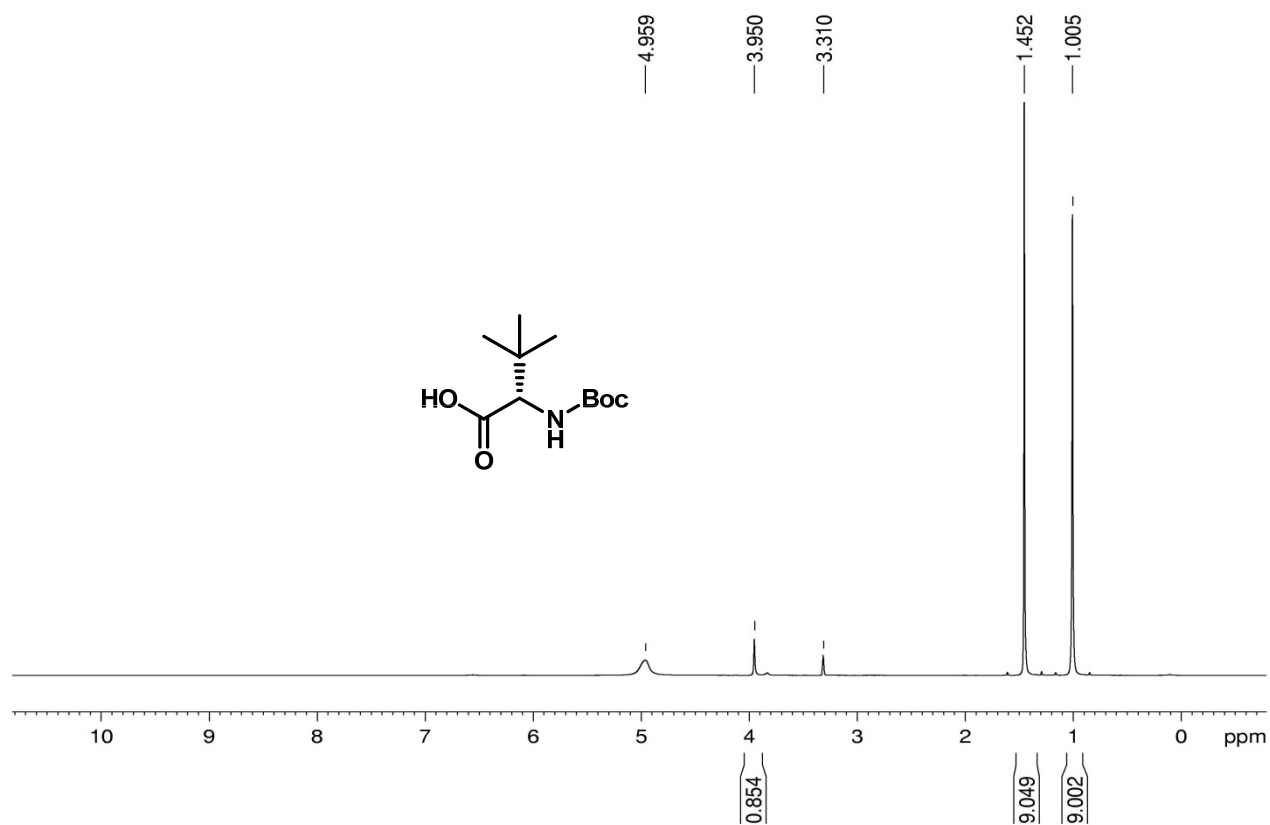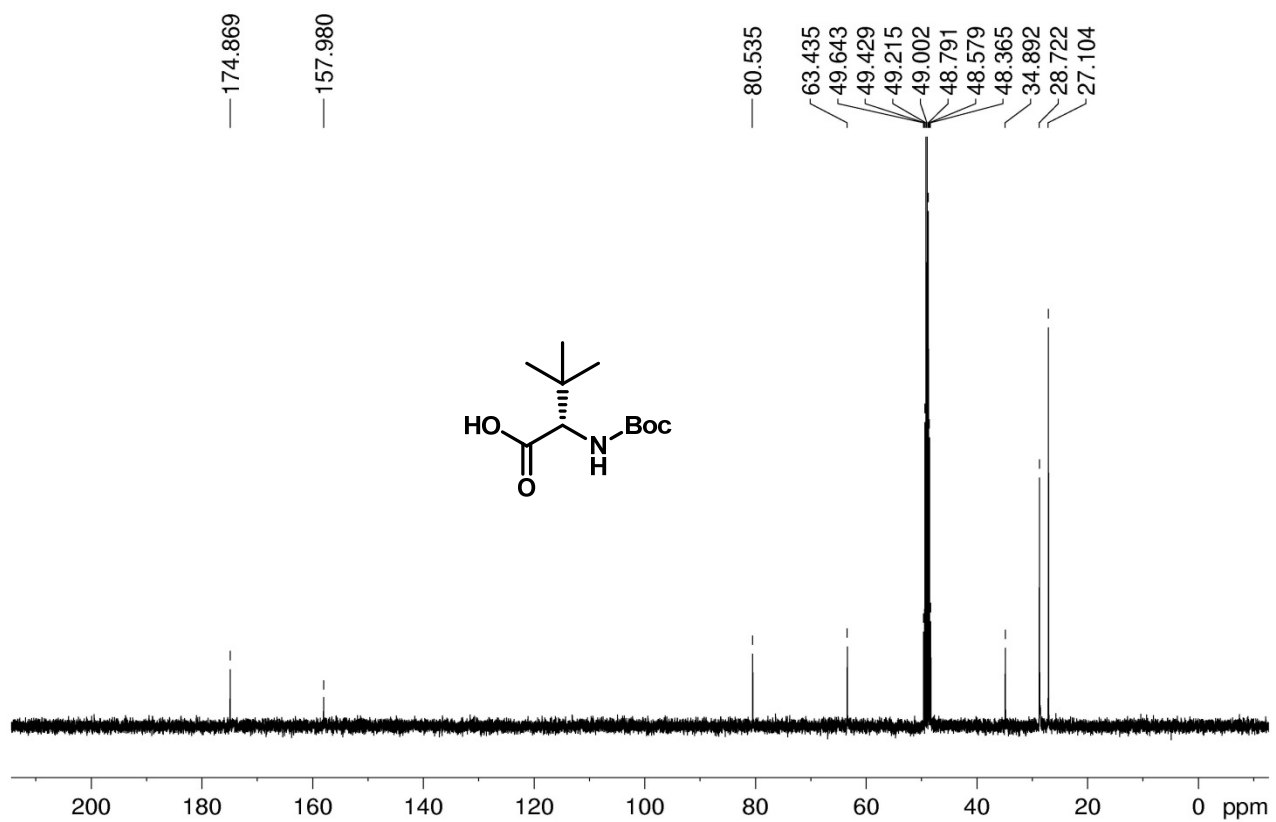

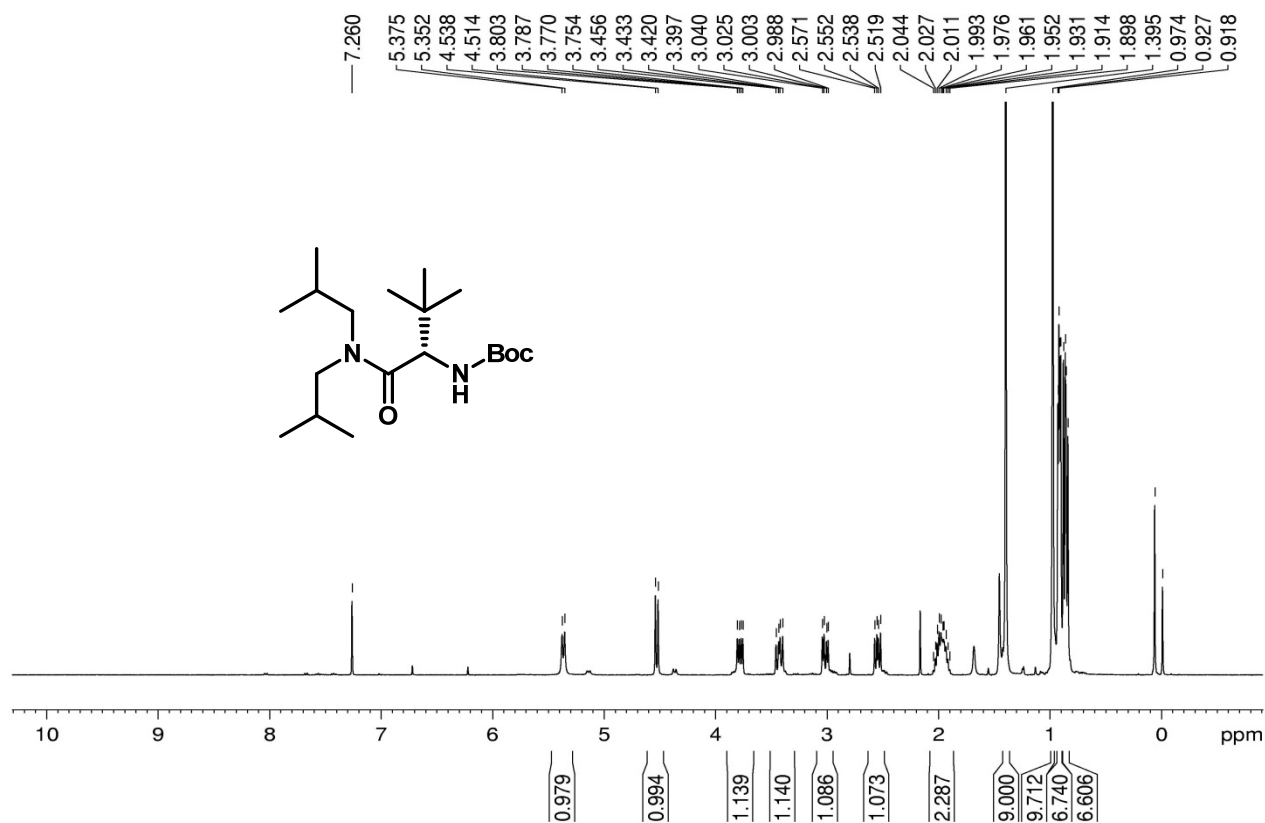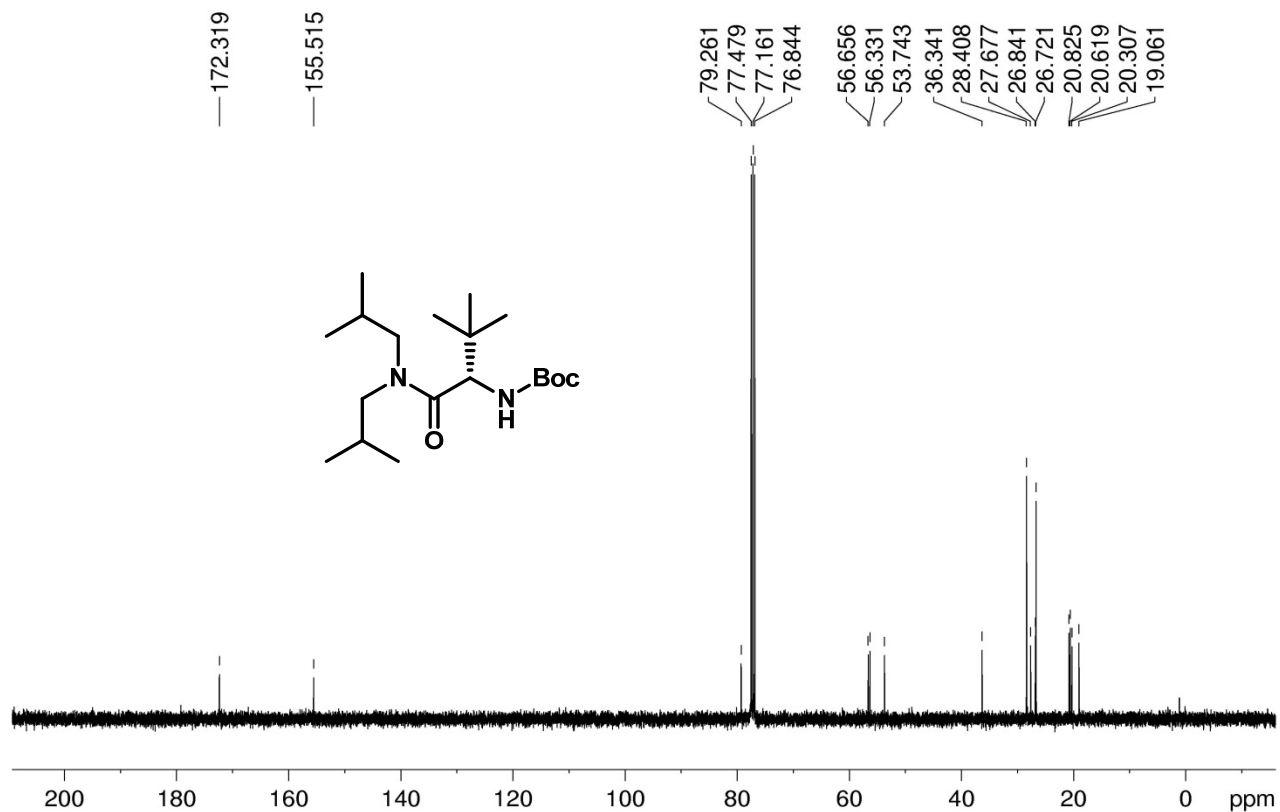

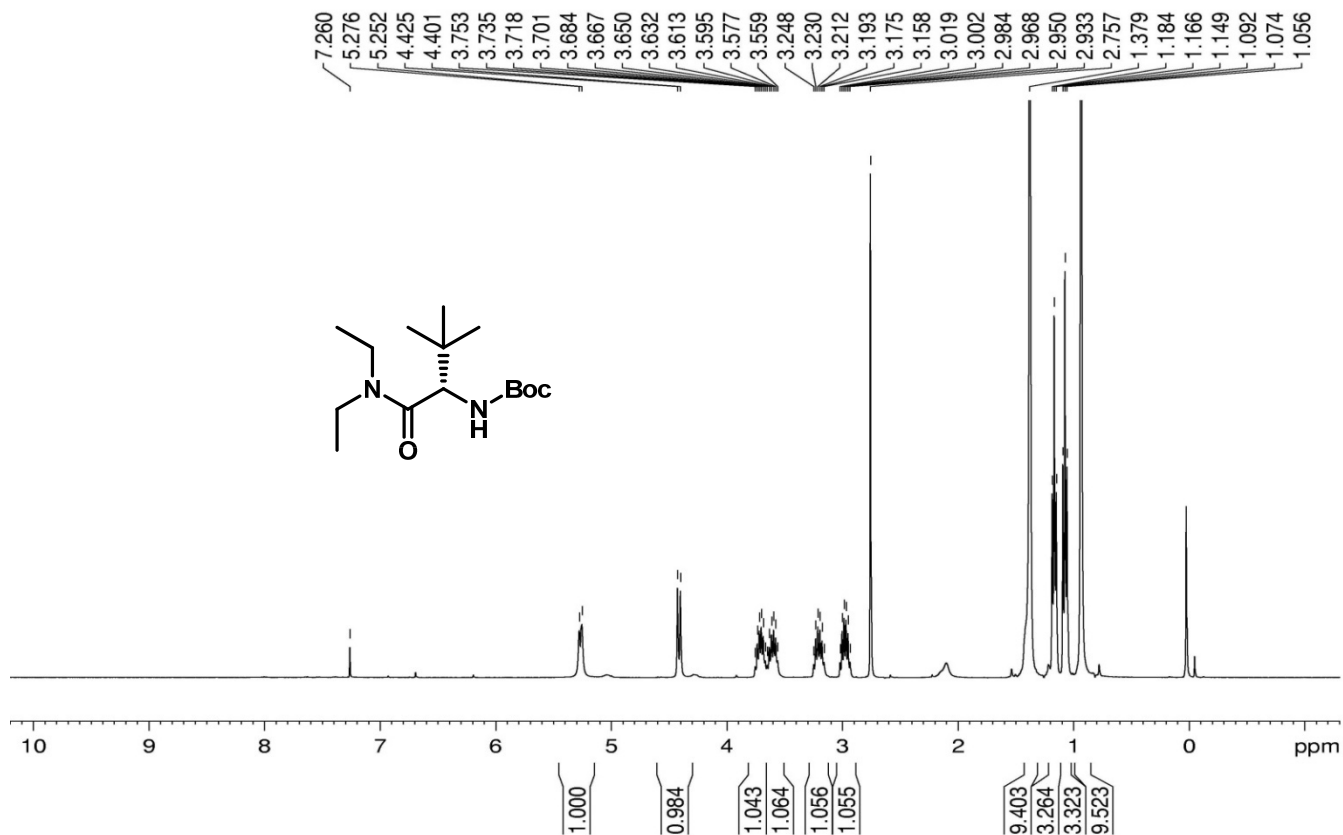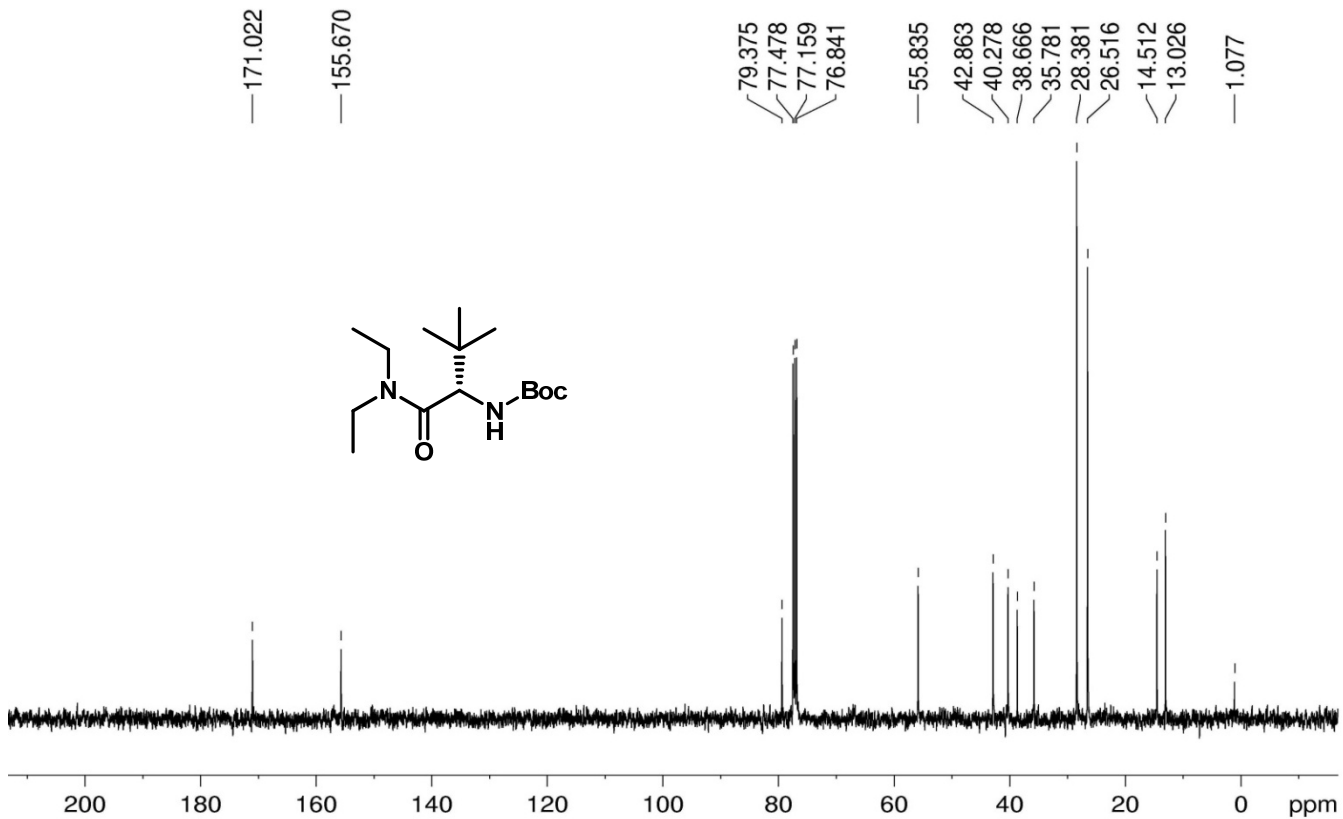

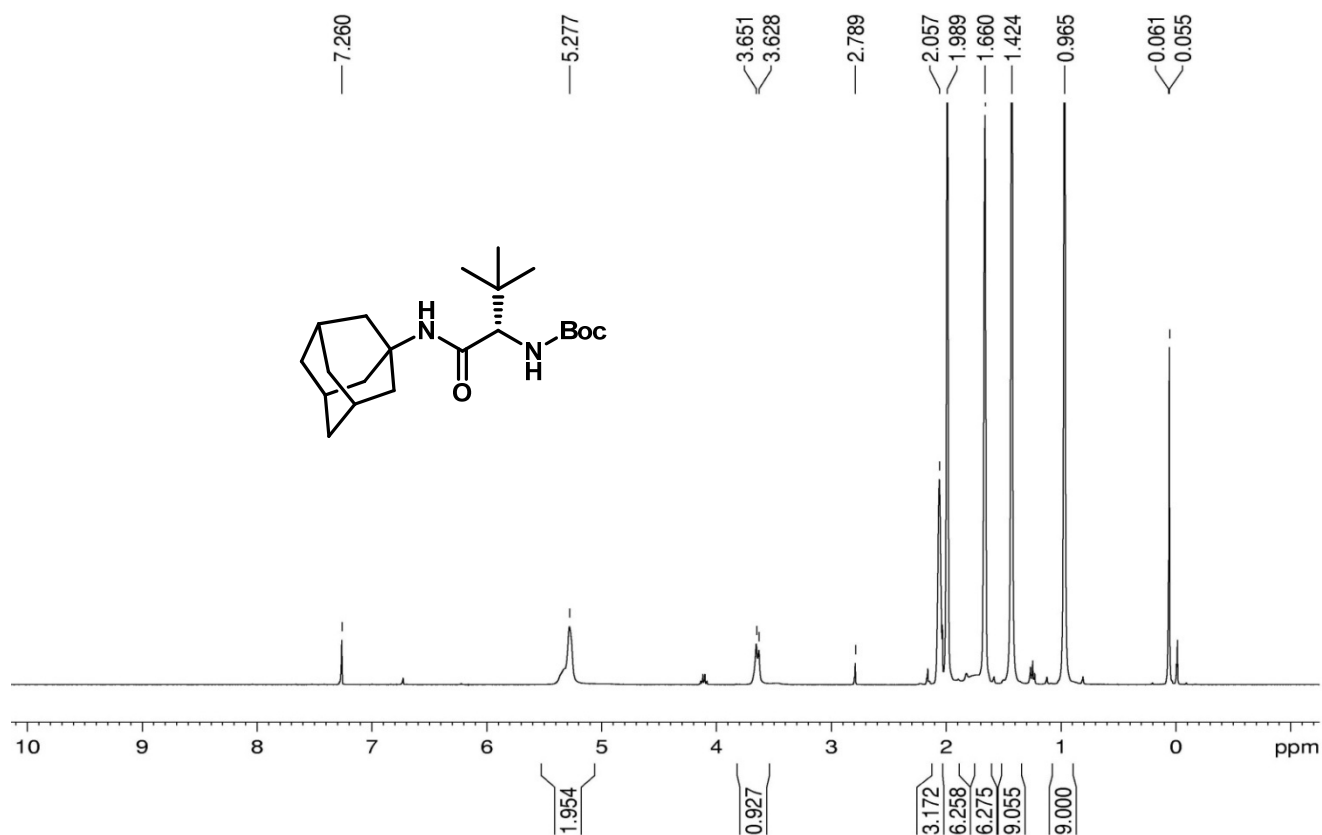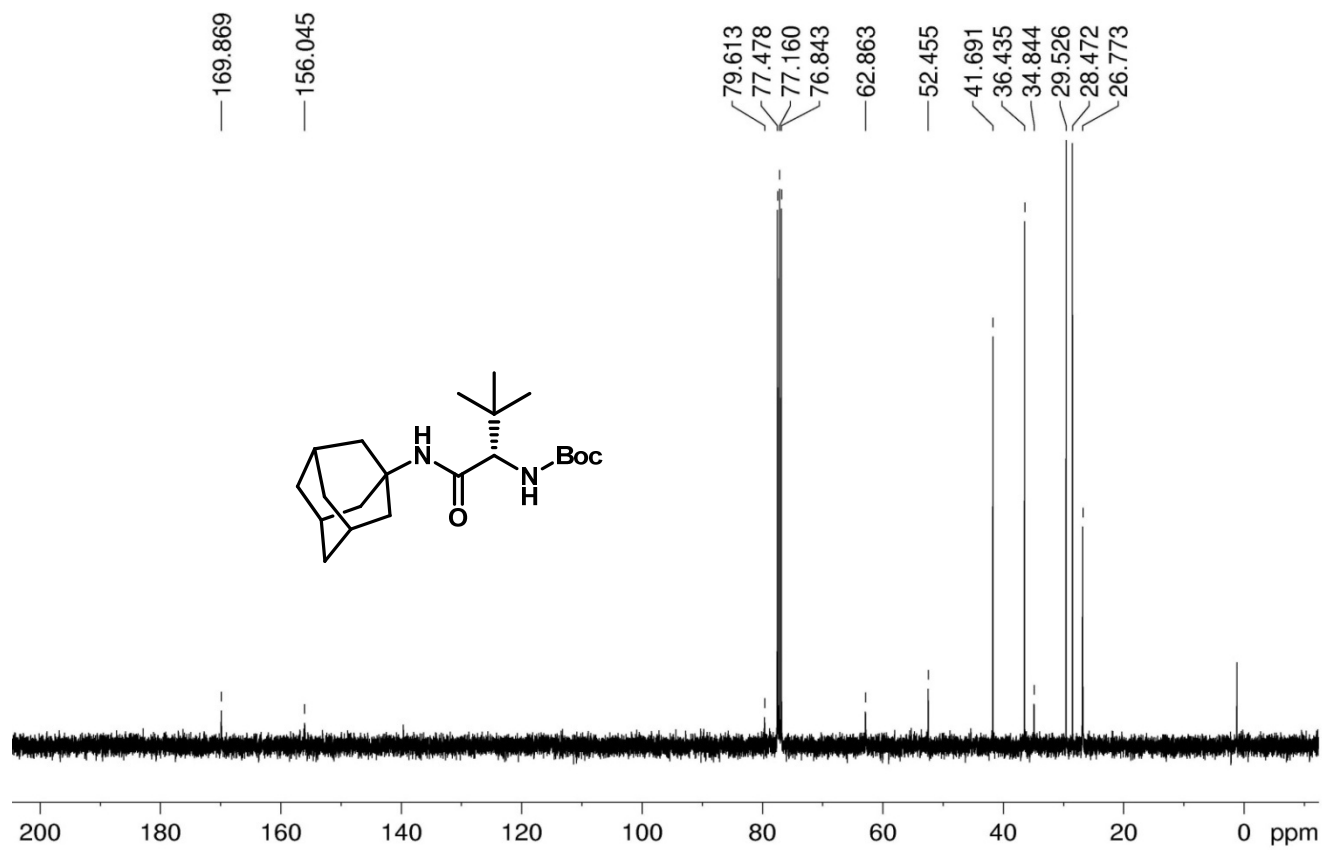

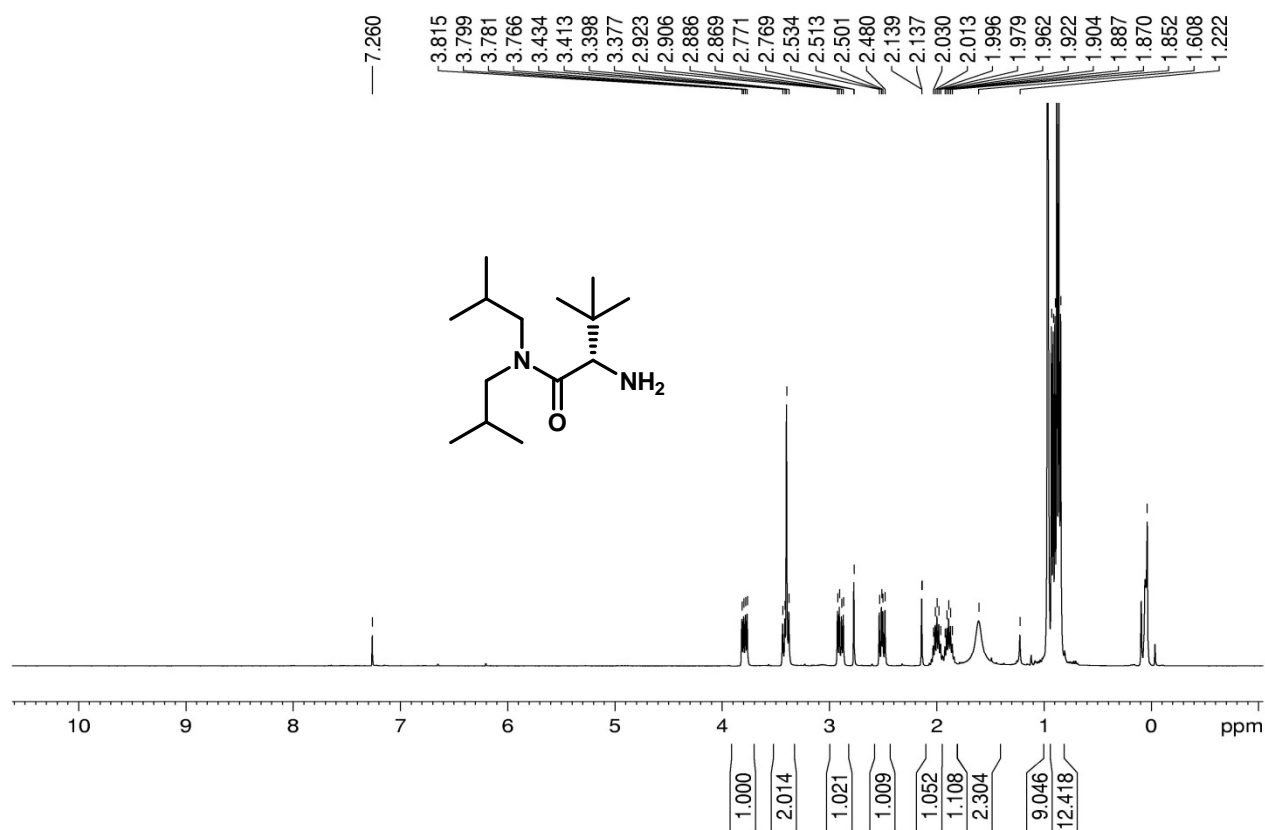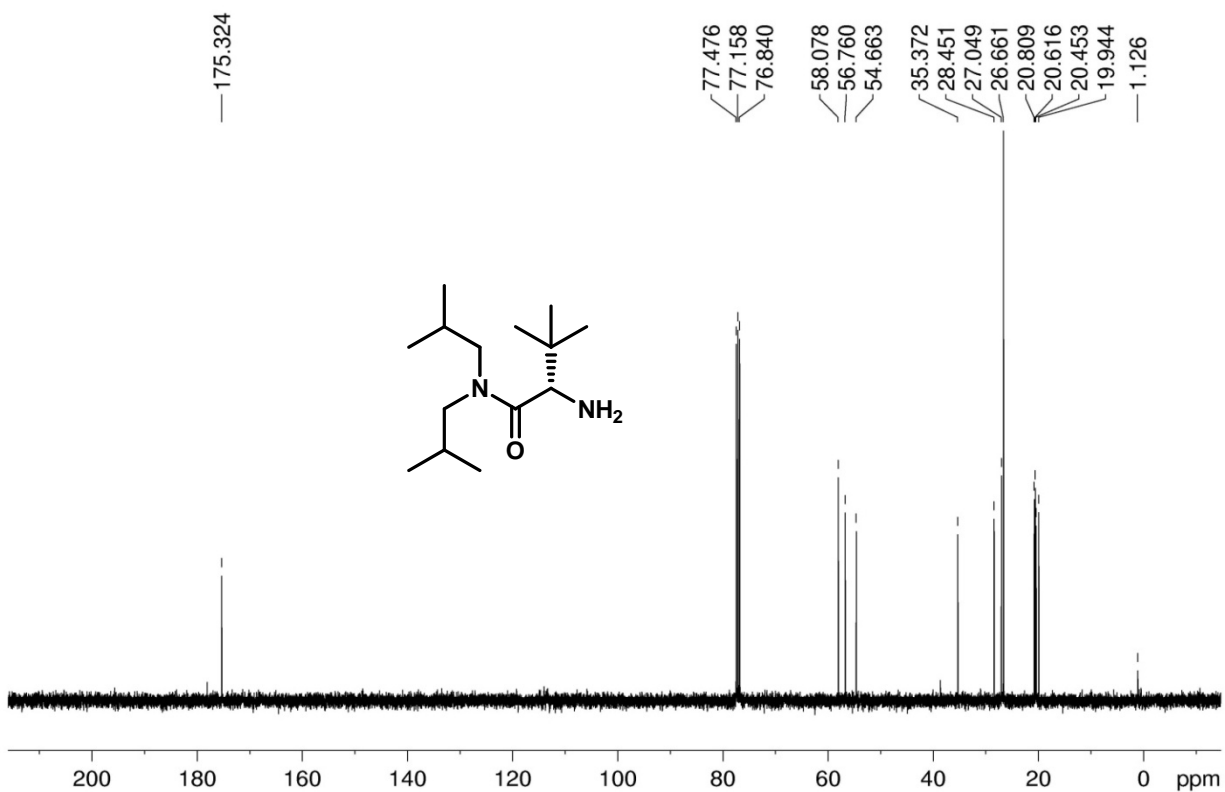

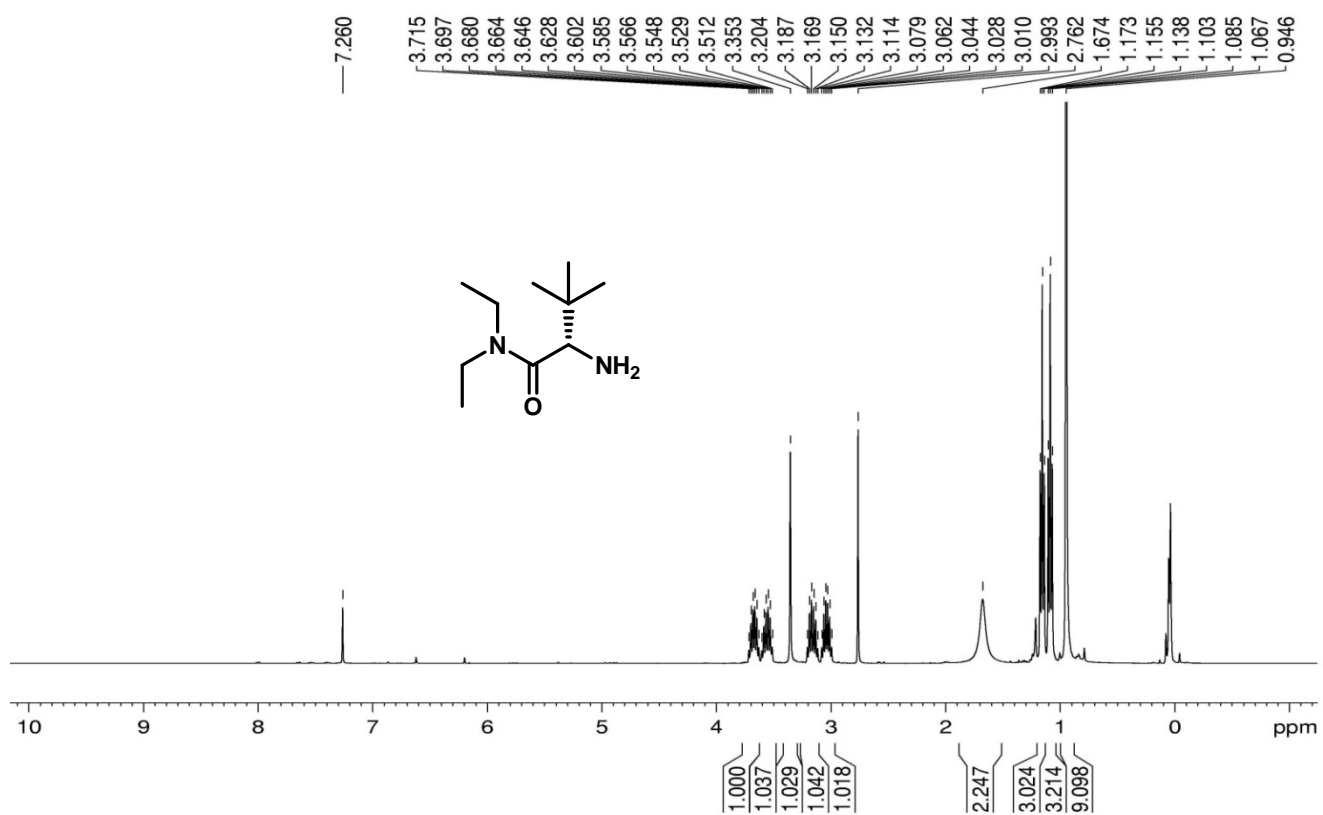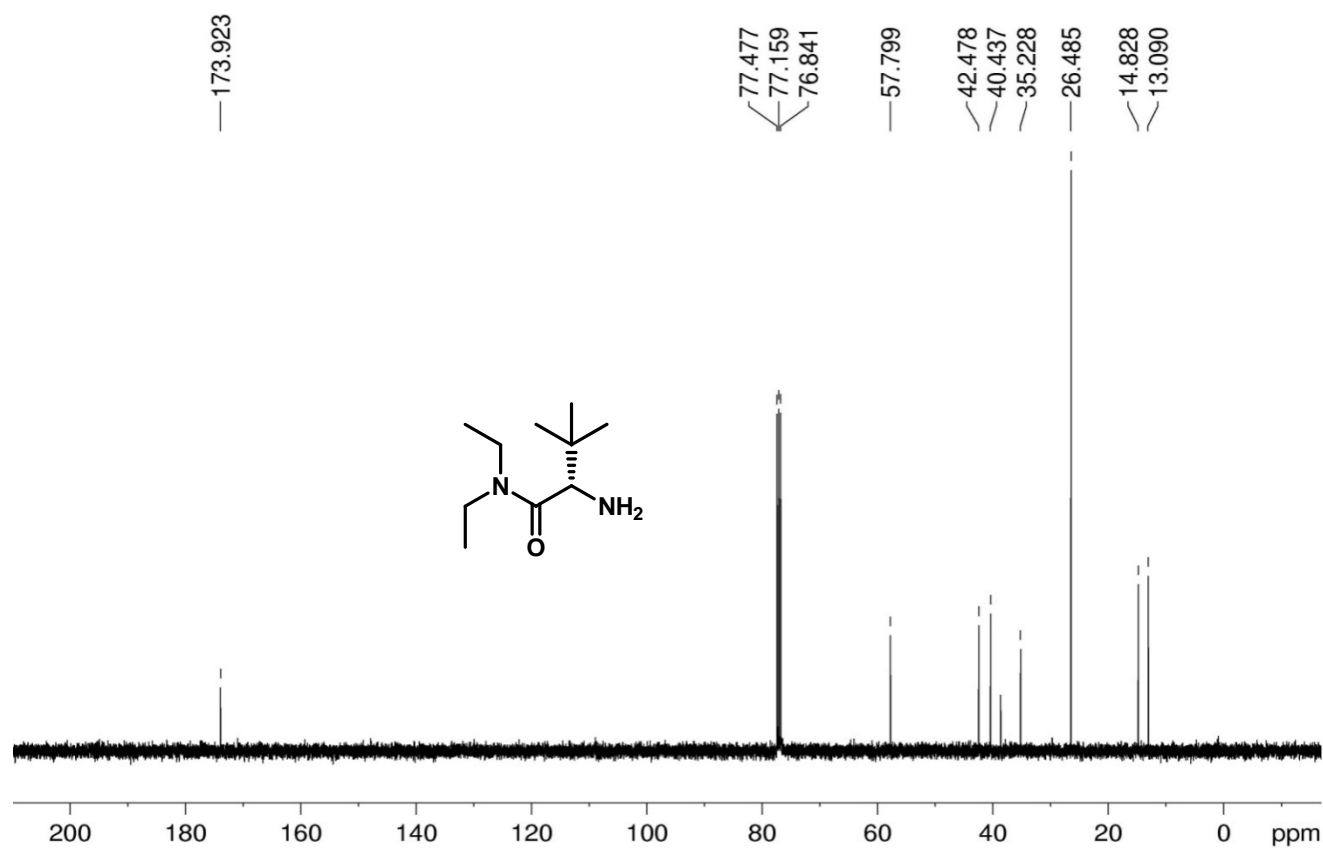

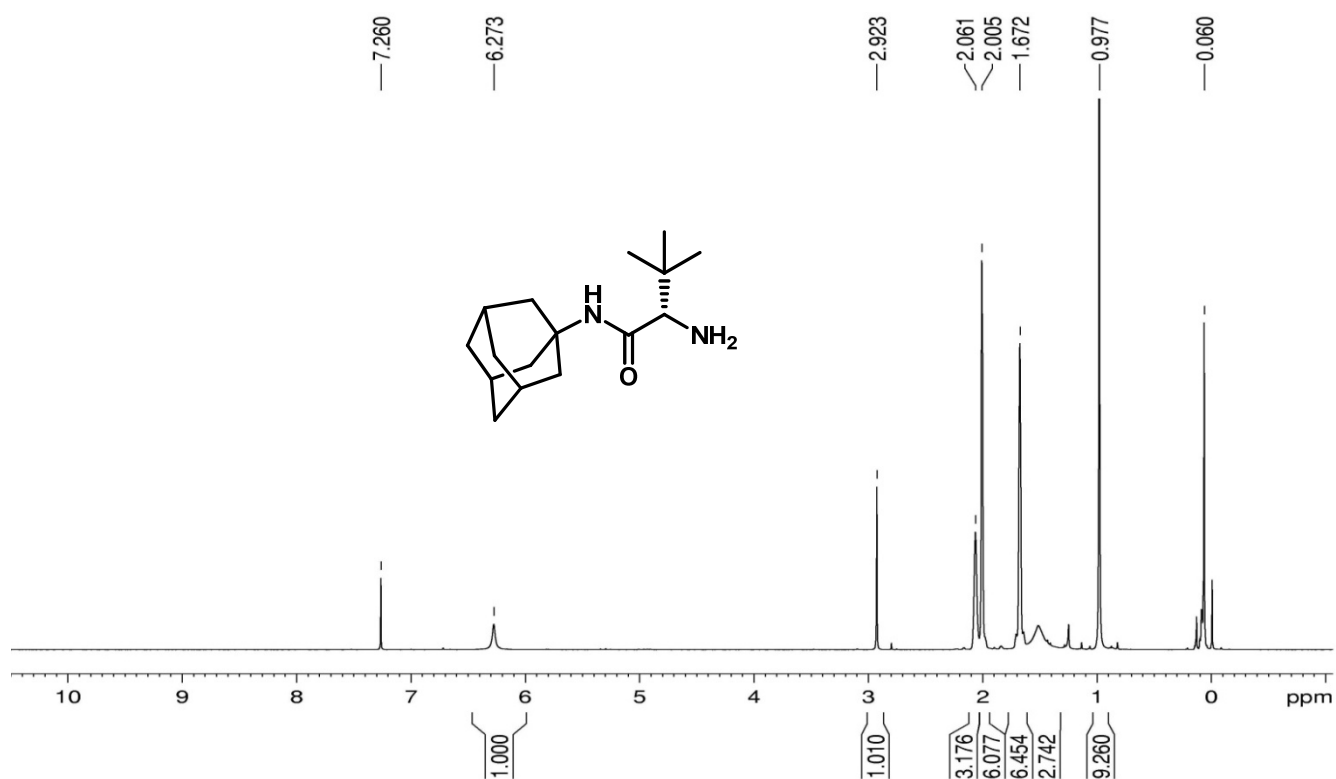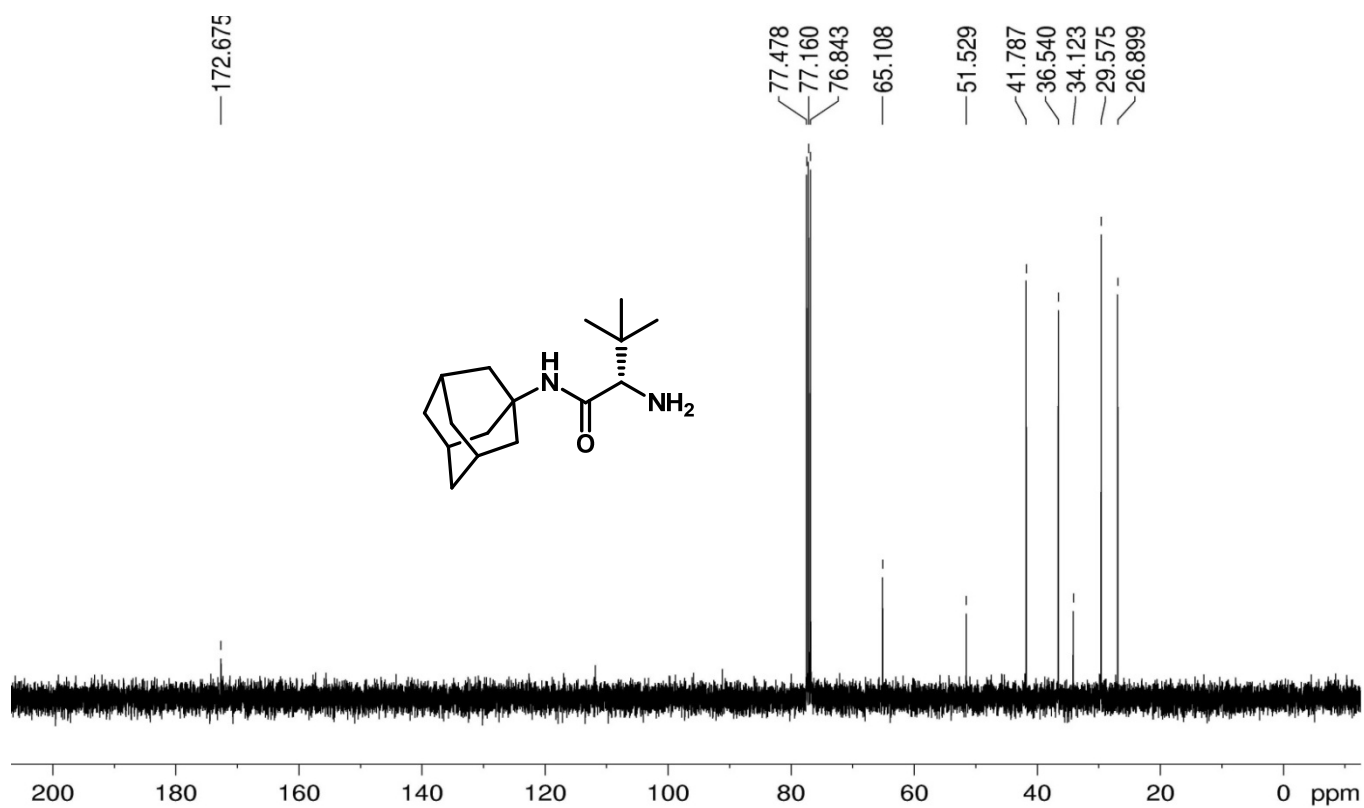

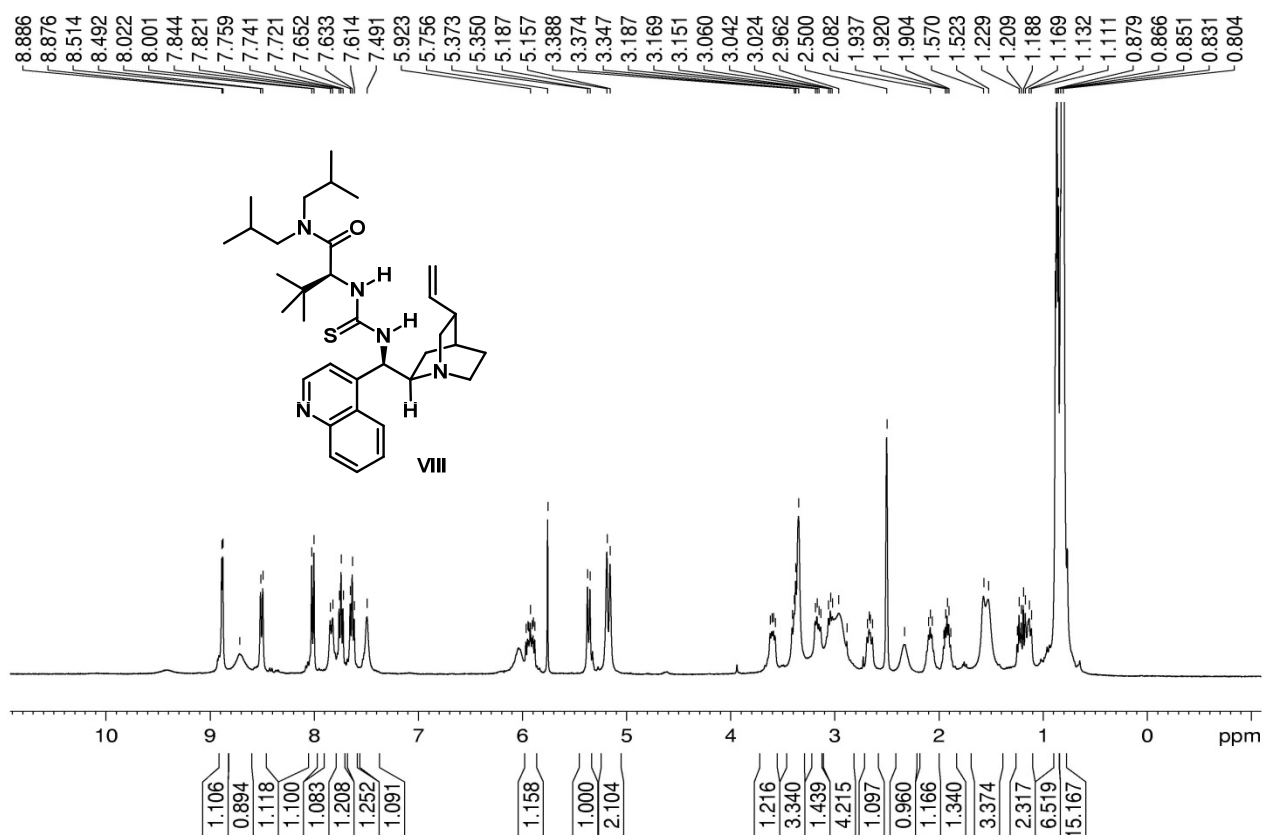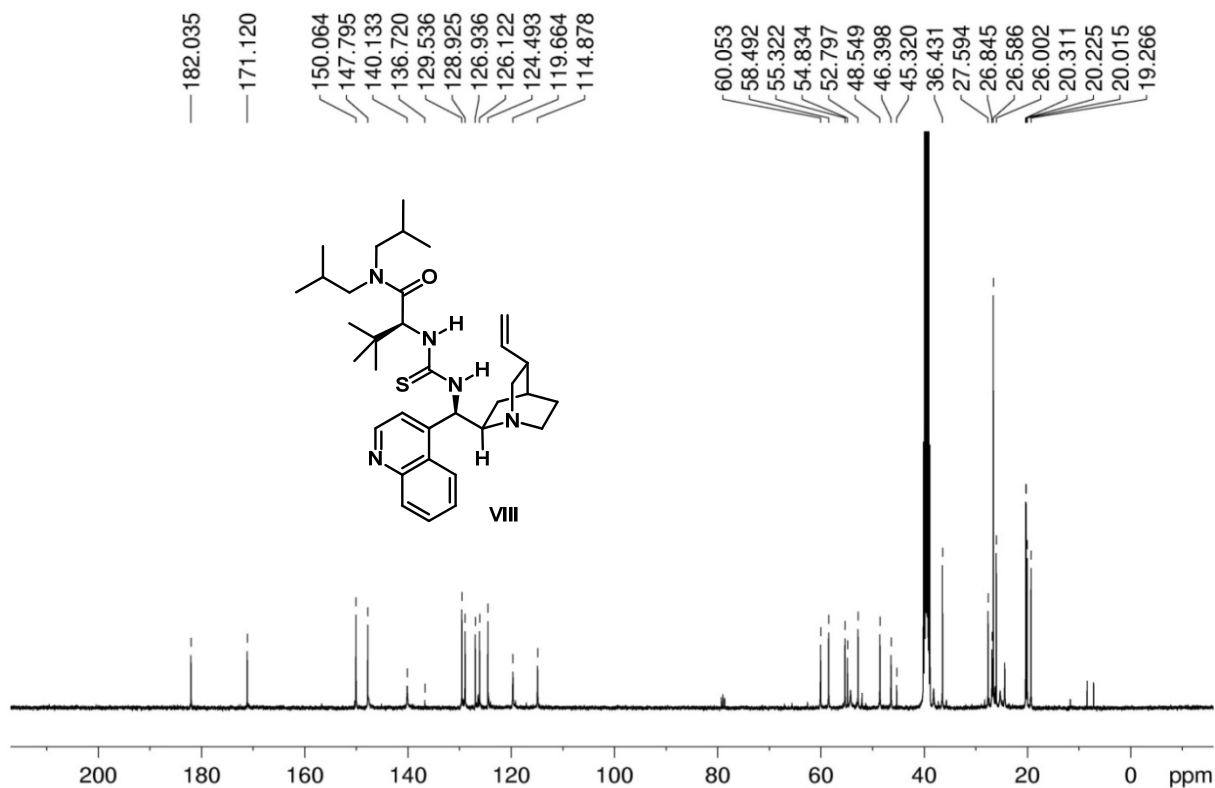

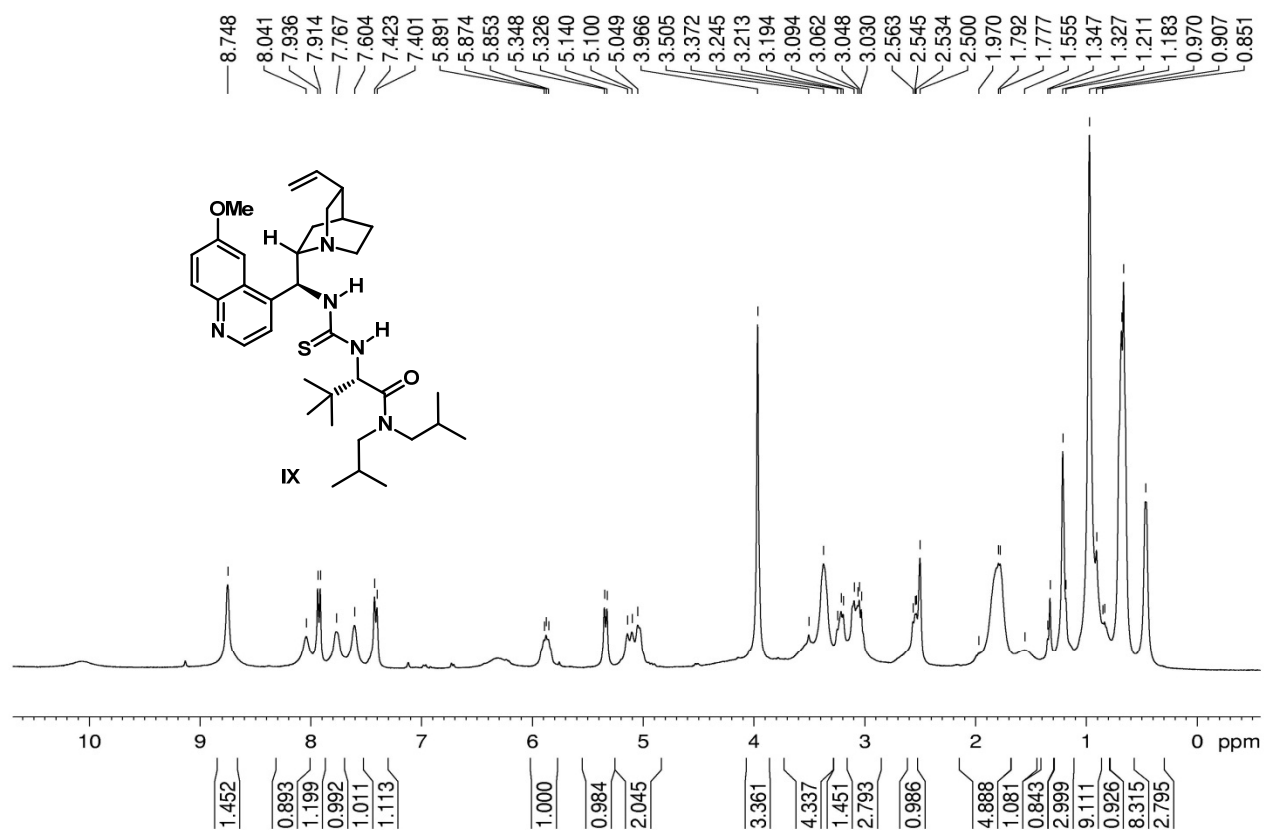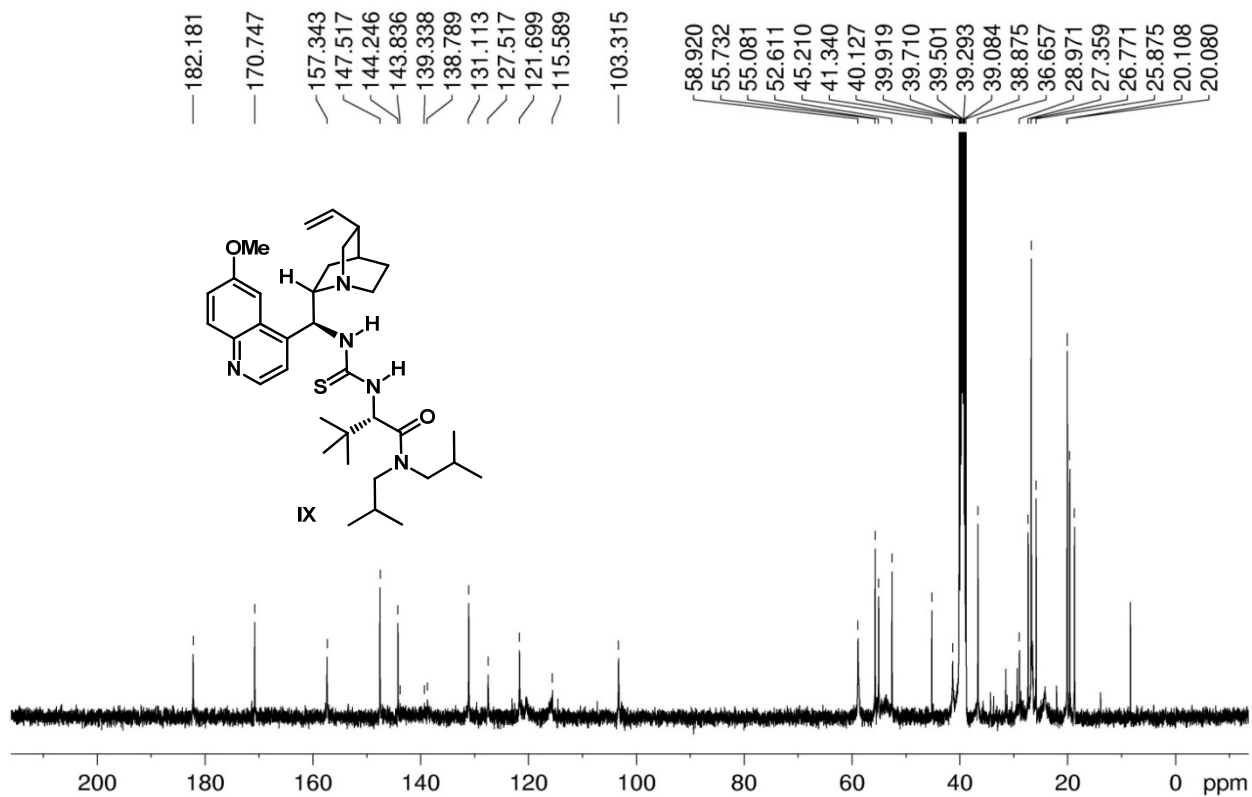

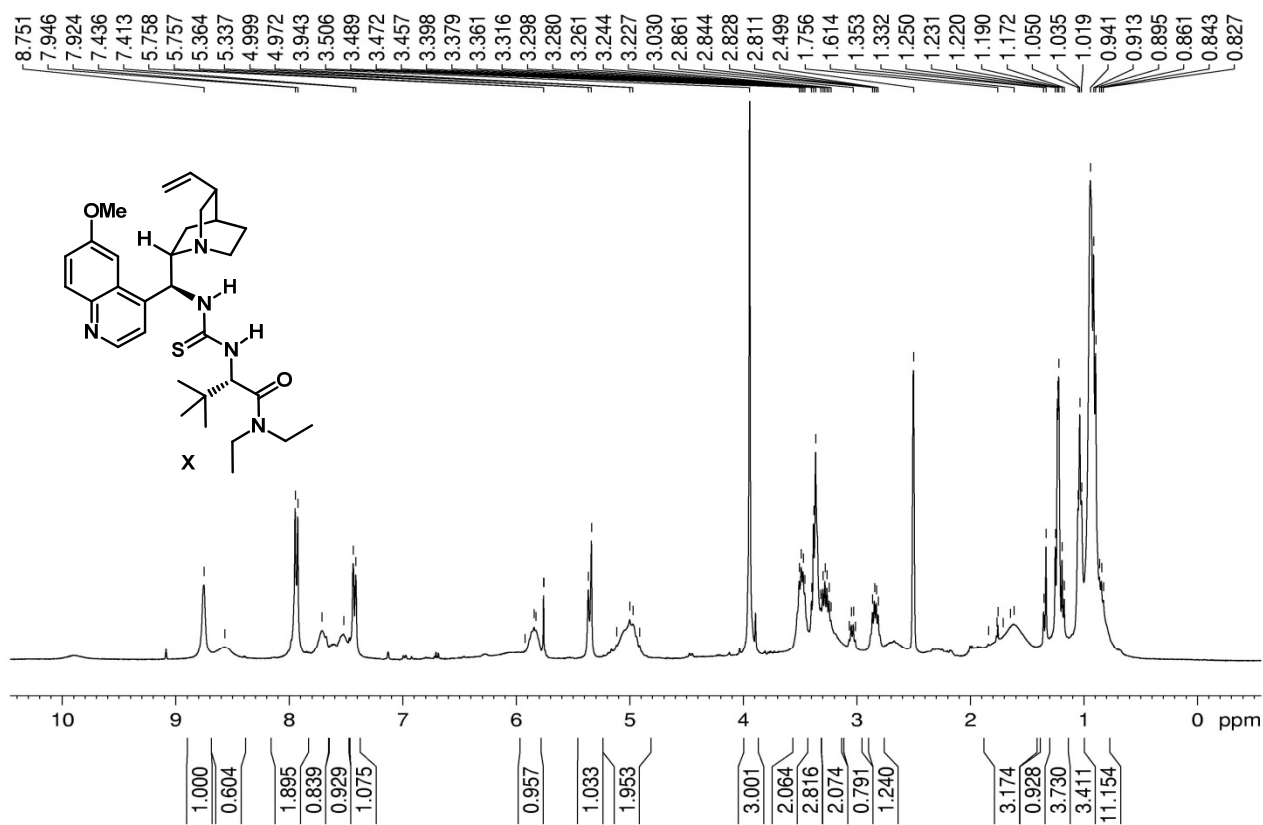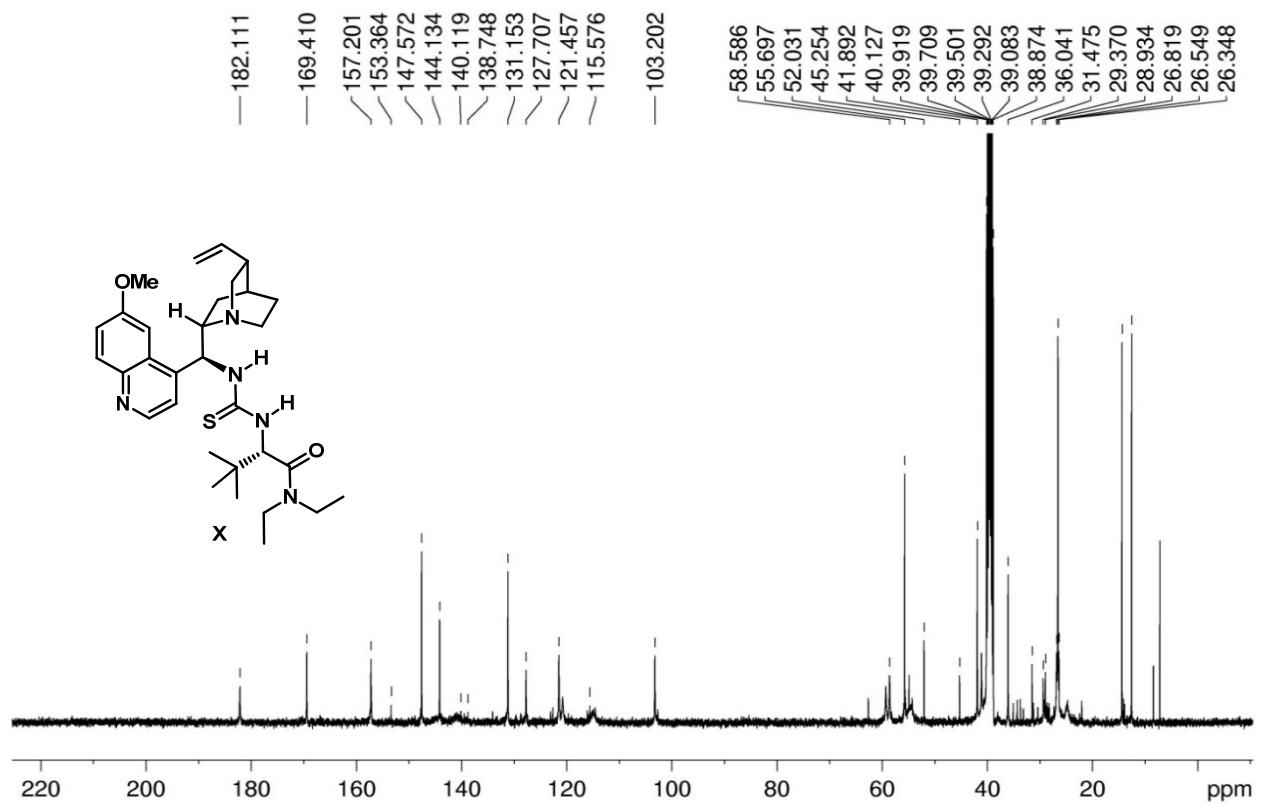

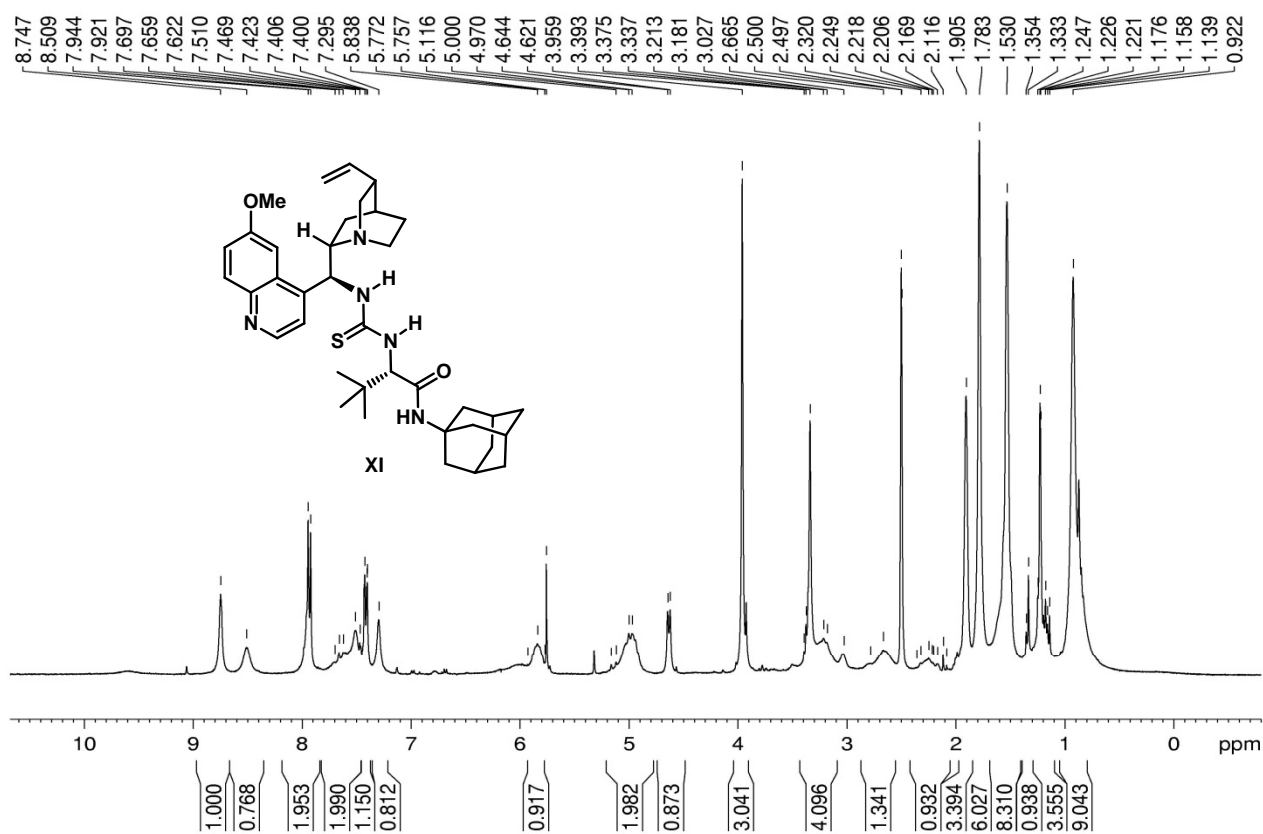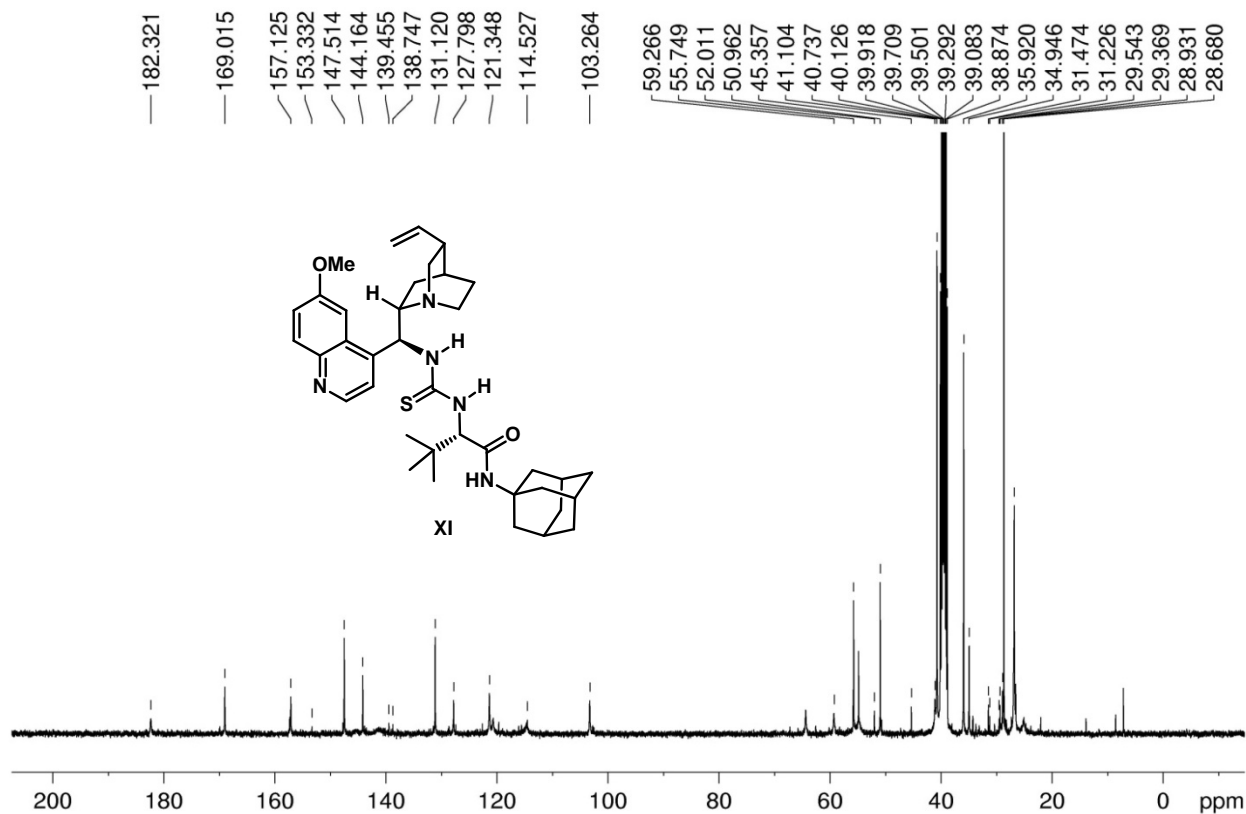

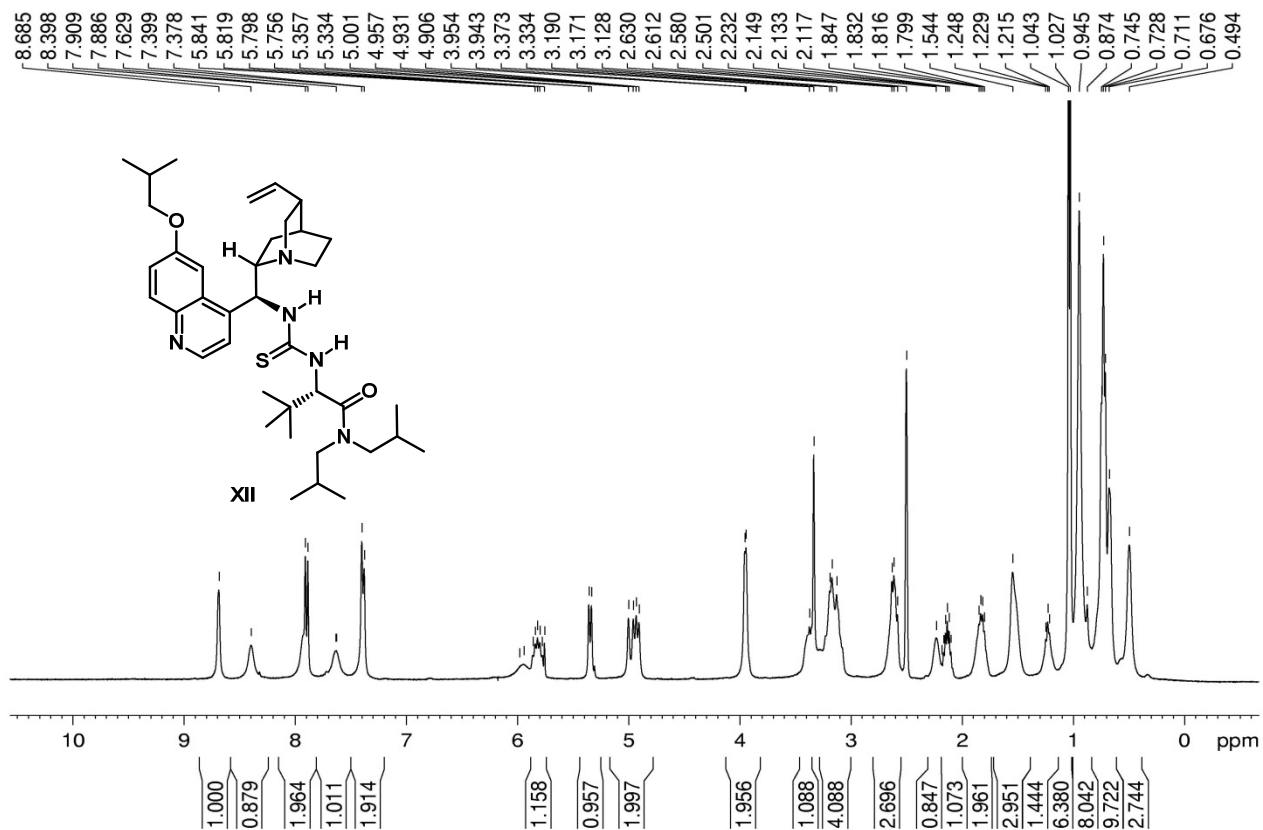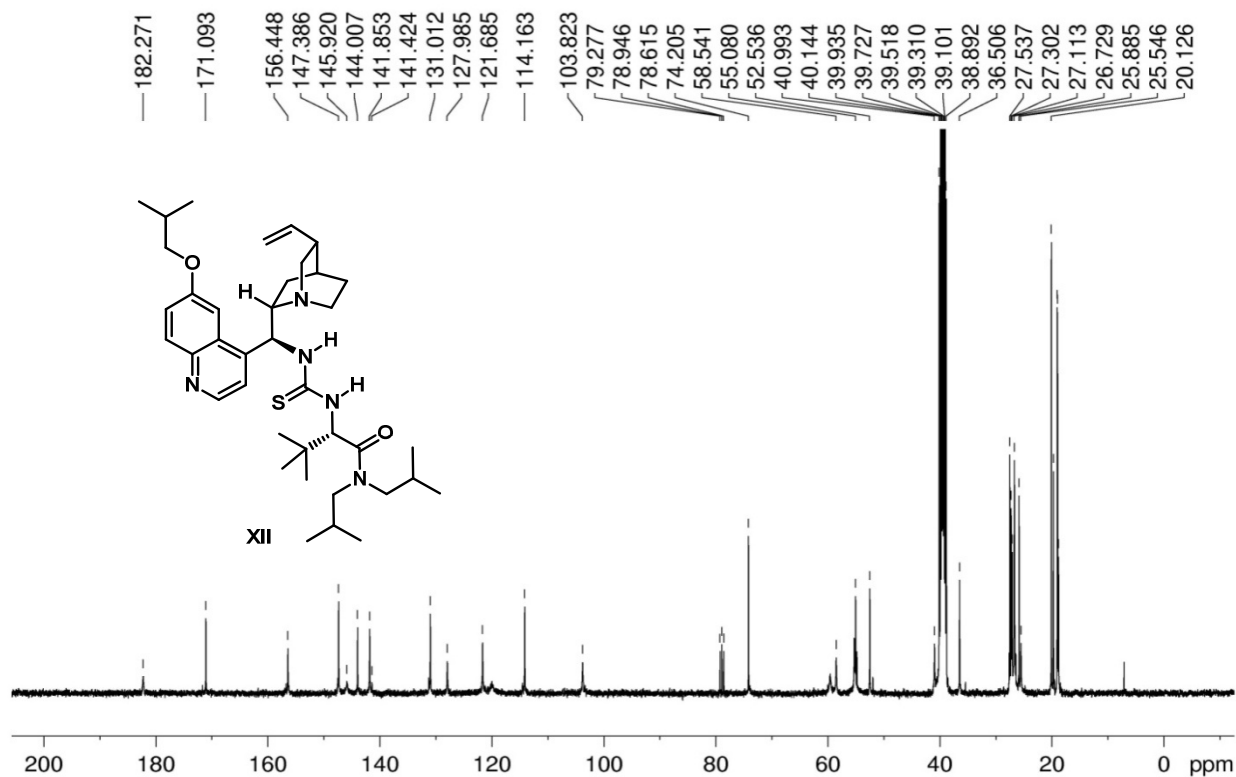

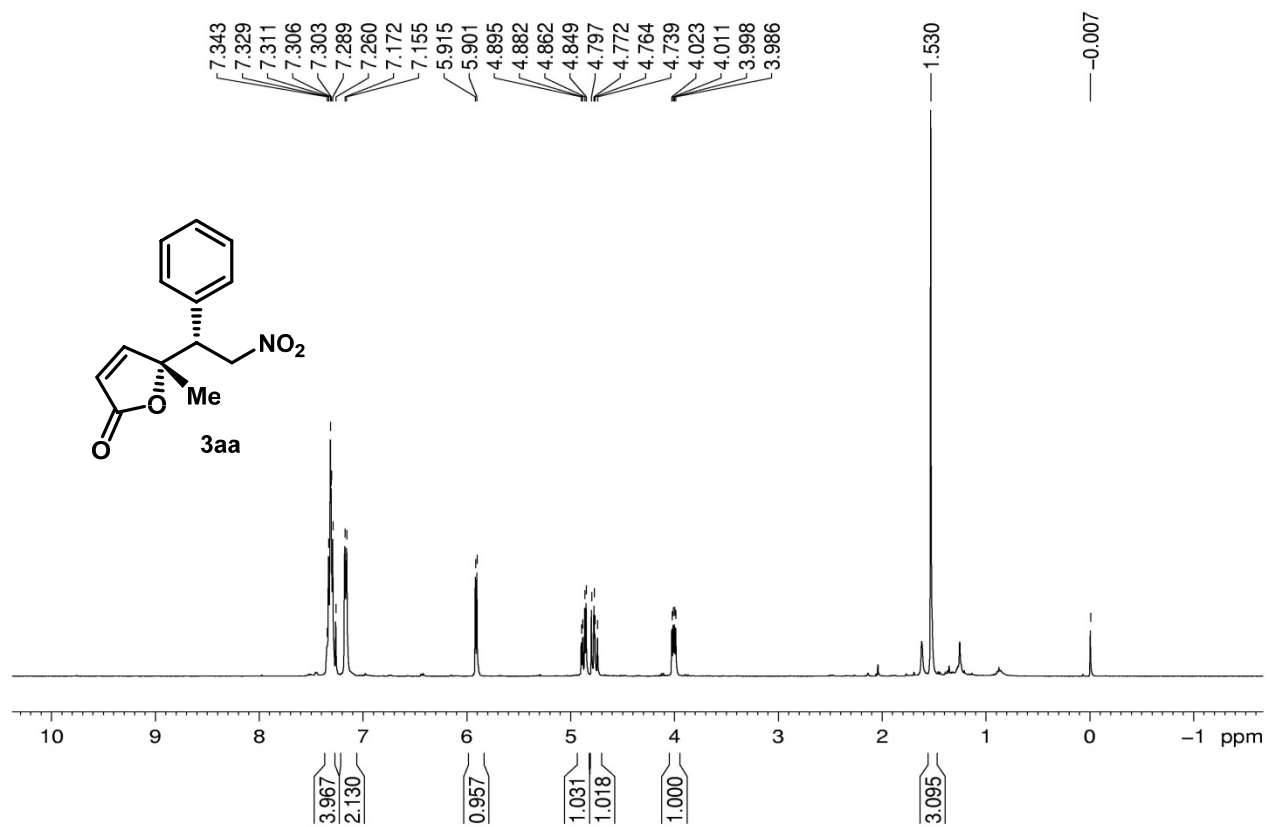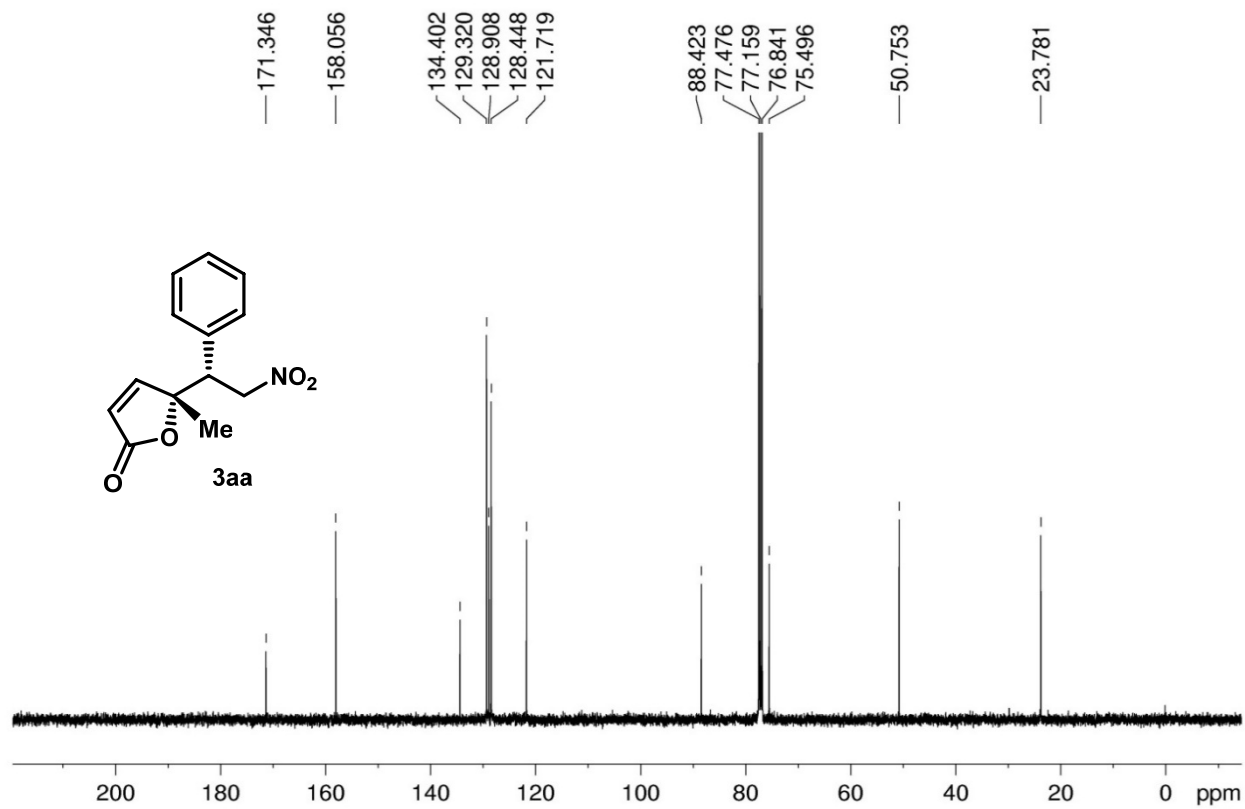

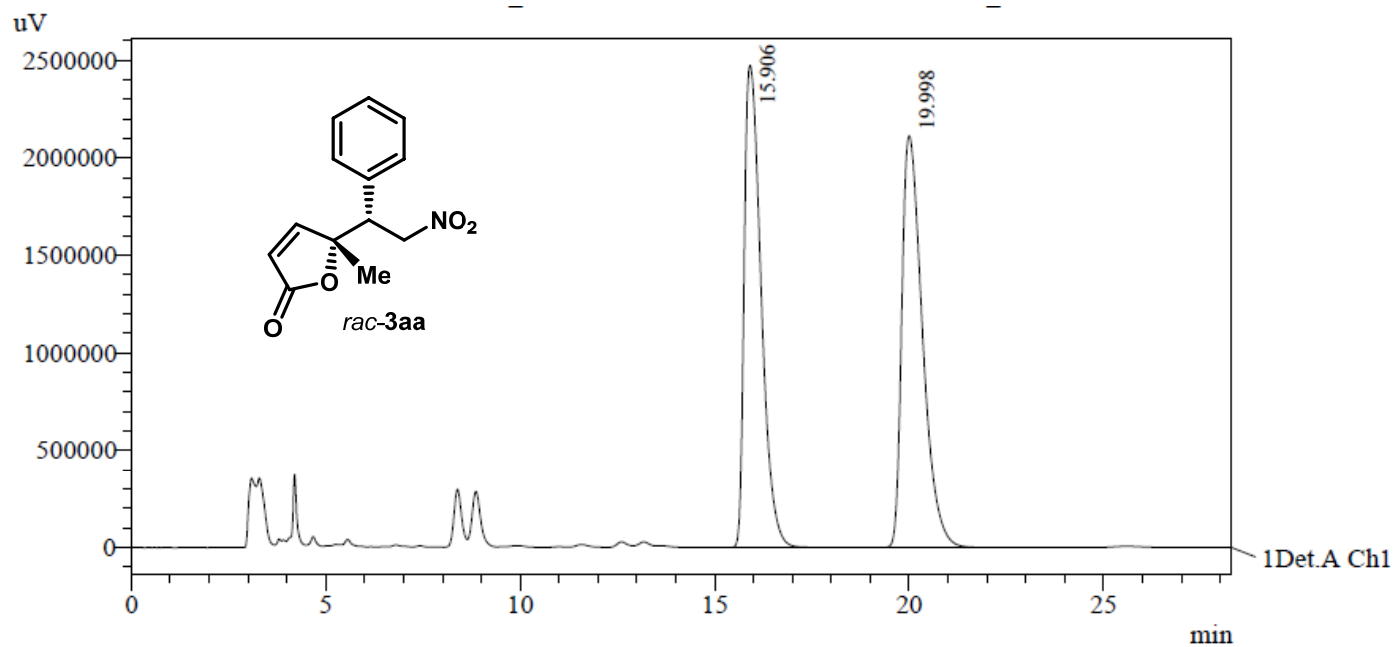

PeakTable

Detector A Ch1 210nm

| Peak# | Ret. Time | Area      | Area %  |
|-------|-----------|-----------|---------|
| 1     | 15.906    | 74738100  | 48.991  |
| 2     | 19.998    | 77816421  | 51.009  |
| Total |           | 152554520 | 100.000 |

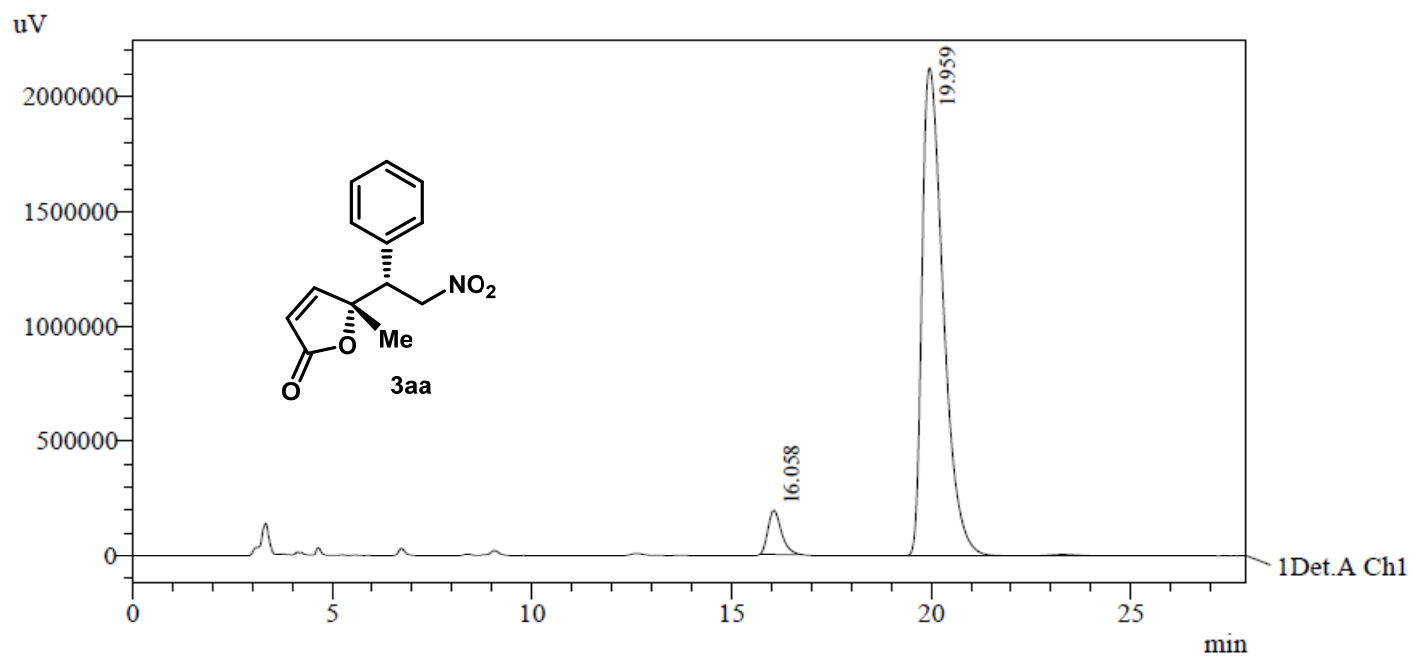

PeakTable

Detector A Ch1 210nm

| Peak# | Ret. Time | Area     | Area %  |
|-------|-----------|----------|---------|
| 1     | 16.058    | 4604234  | 5.502   |
| 2     | 19.959    | 79071492 | 94.498  |
| Total |           | 83675726 | 100.000 |

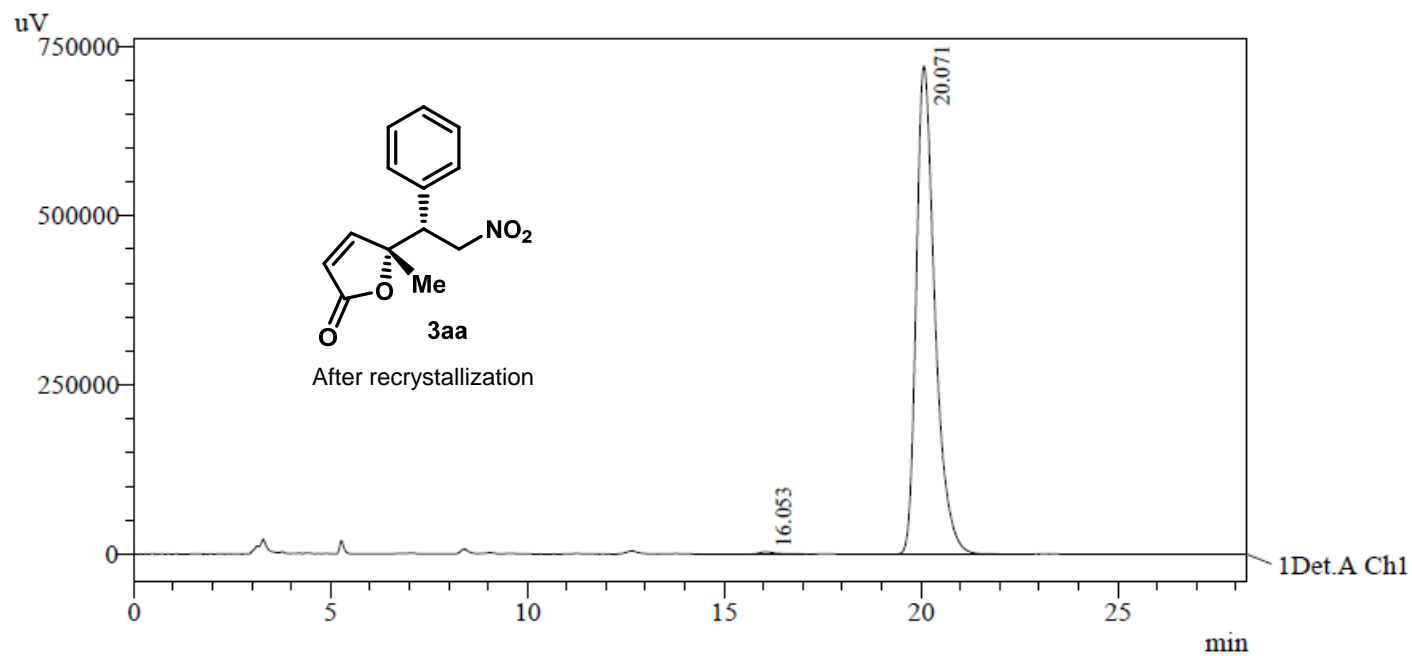

PeakTable

Detector A Ch1 210nm

| Peak# | Ret. Time | Area     | Area %  |
|-------|-----------|----------|---------|
| 1     | 16.053    | 85559    | 0.359   |
| 2     | 20.071    | 23776017 | 99.641  |
| Total |           | 23861575 | 100.000 |

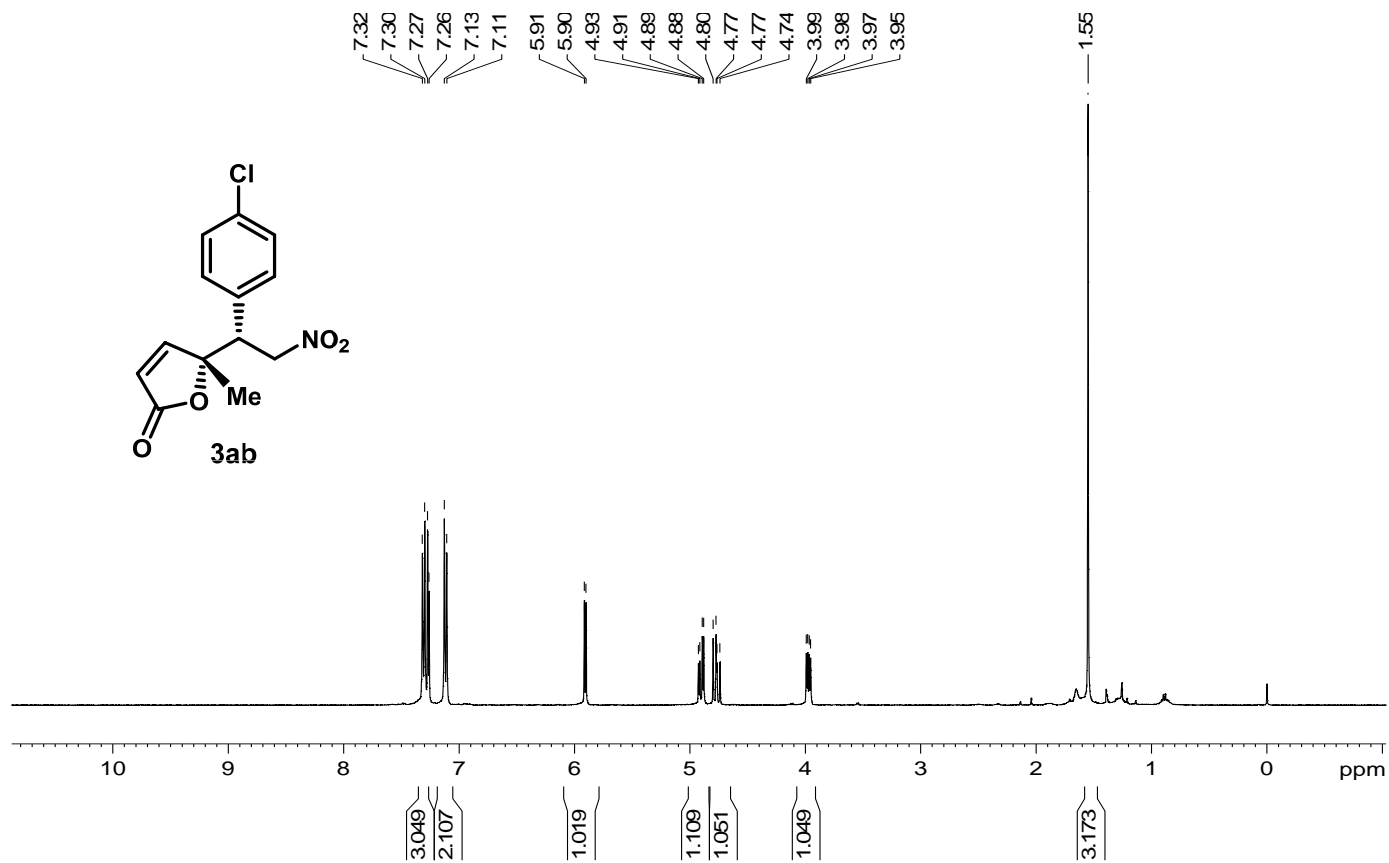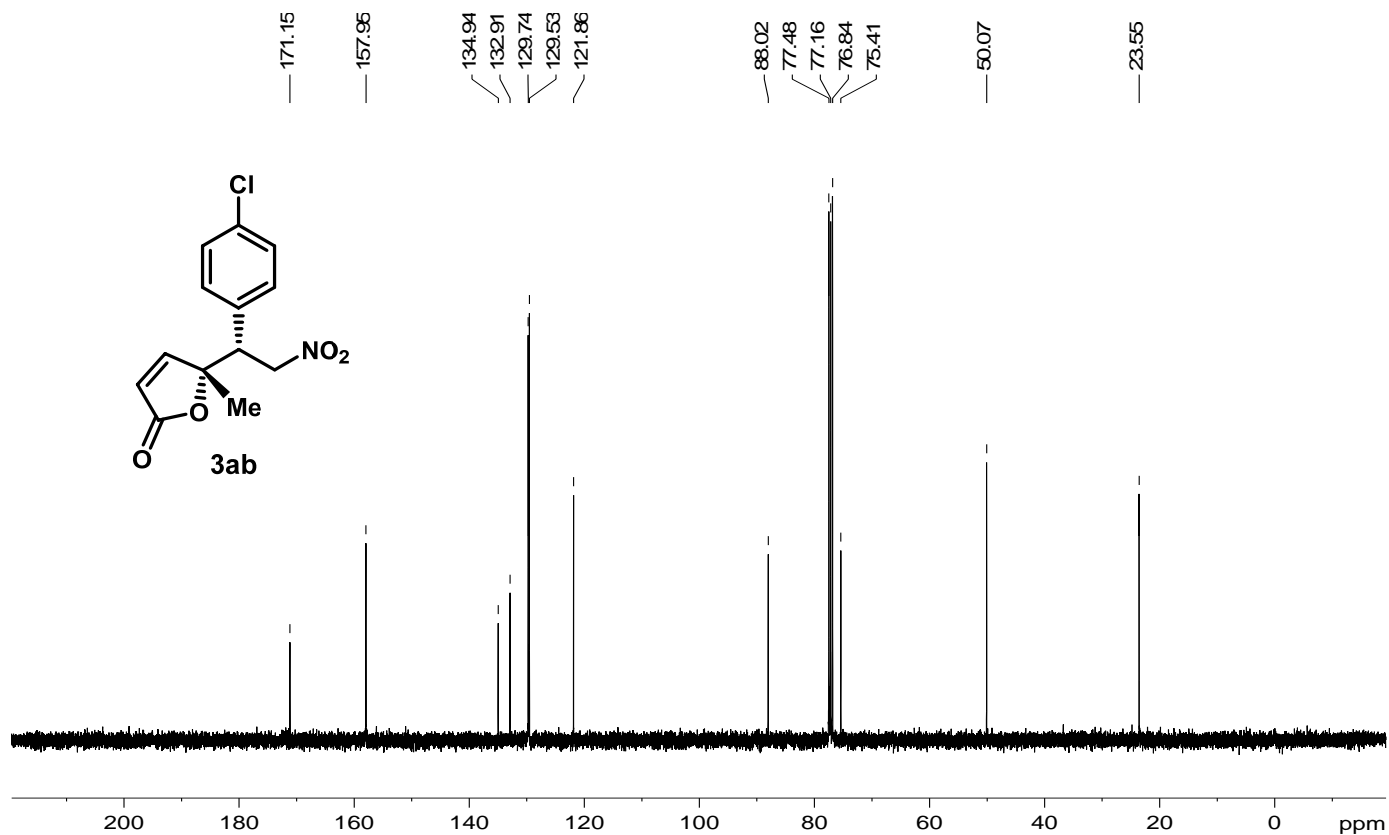

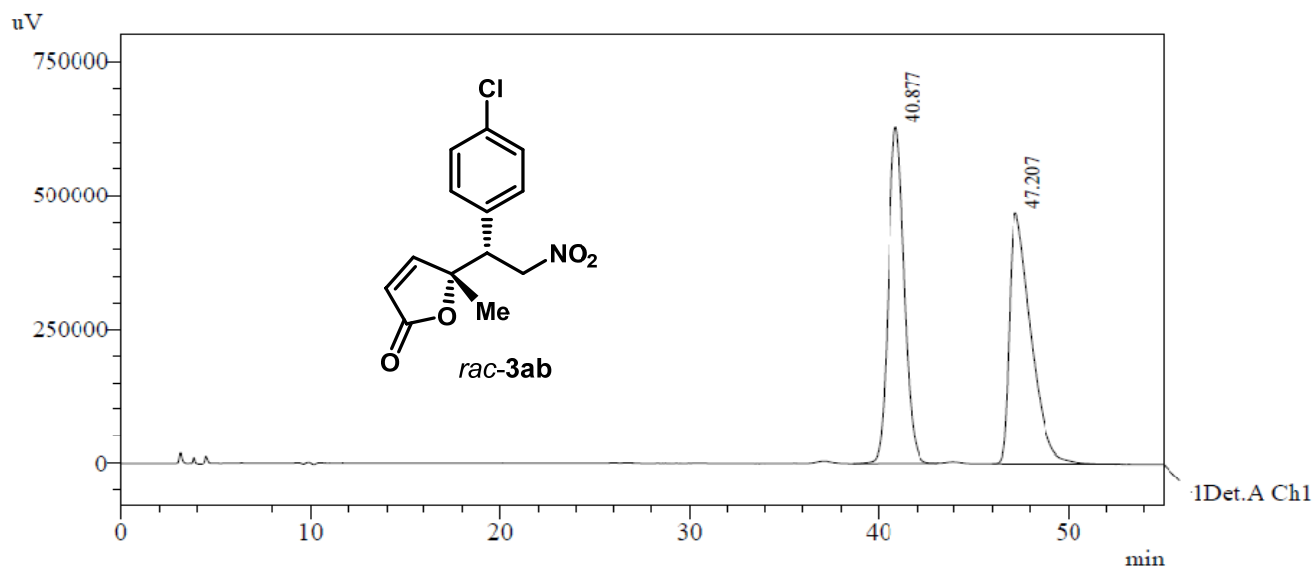

PeakTable

Detector A Ch1 210nm

| Peak# | Ret. Time | Area     | Area %  |
|-------|-----------|----------|---------|
| 1     | 40.877    | 36534265 | 49.720  |
| 2     | 47.207    | 36945932 | 50.280  |
| Total |           | 73480197 | 100.000 |

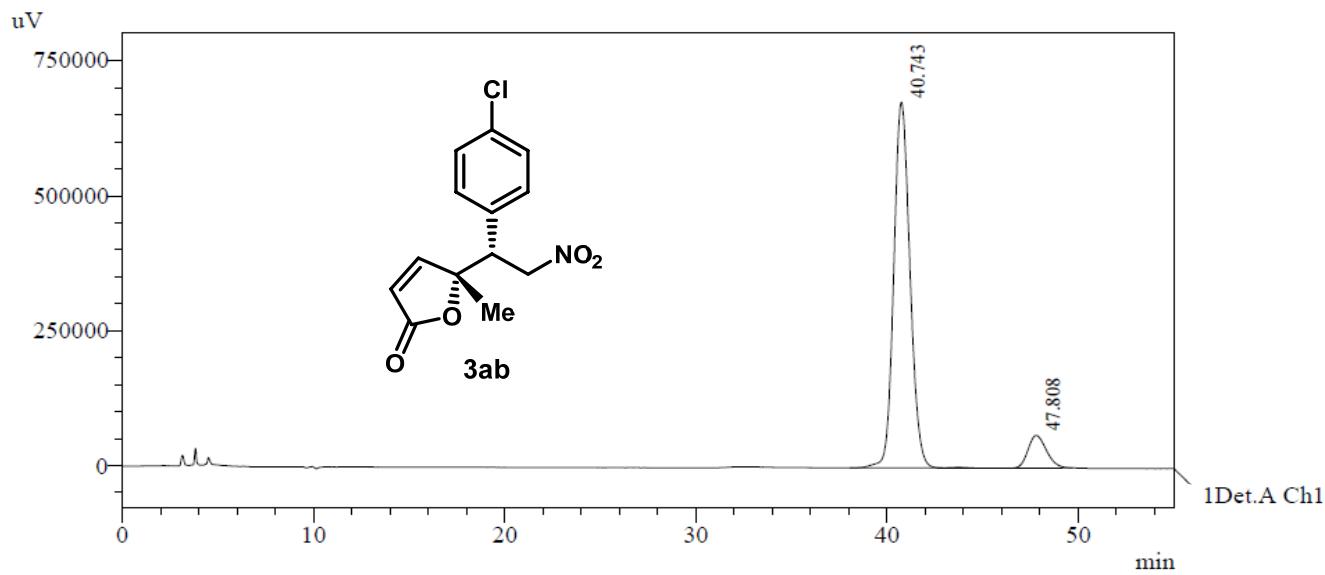

PeakTable

Detector A Ch1 210nm

| Peak# | Ret. Time | Area     | Area %  |
|-------|-----------|----------|---------|
| 1     | 40.743    | 40011675 | 90.836  |
| 2     | 47.808    | 4036399  | 9.164   |
| Total |           | 44048074 | 100.000 |

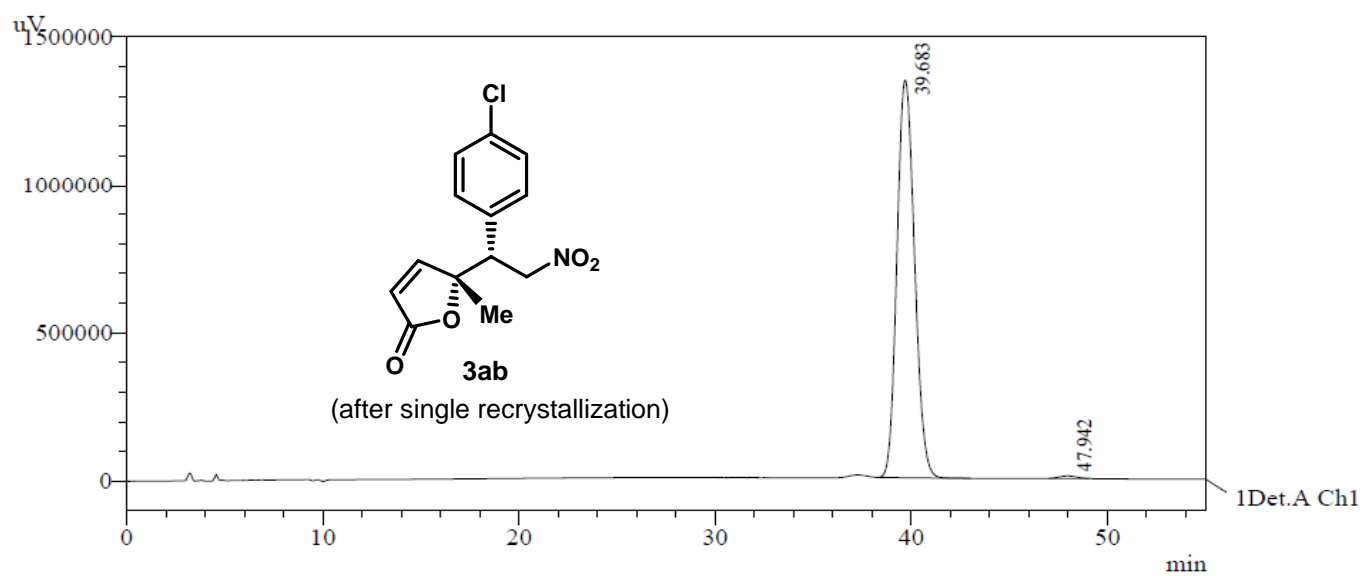

PeakTable

Detector A Ch1 210nm

| Peak# | Ret. Time | Area     | Area %  |
|-------|-----------|----------|---------|
| 1     | 39.683    | 83643108 | 99.382  |
| 2     | 47.942    | 520248   | 0.618   |
| Total |           | 84163355 | 100.000 |

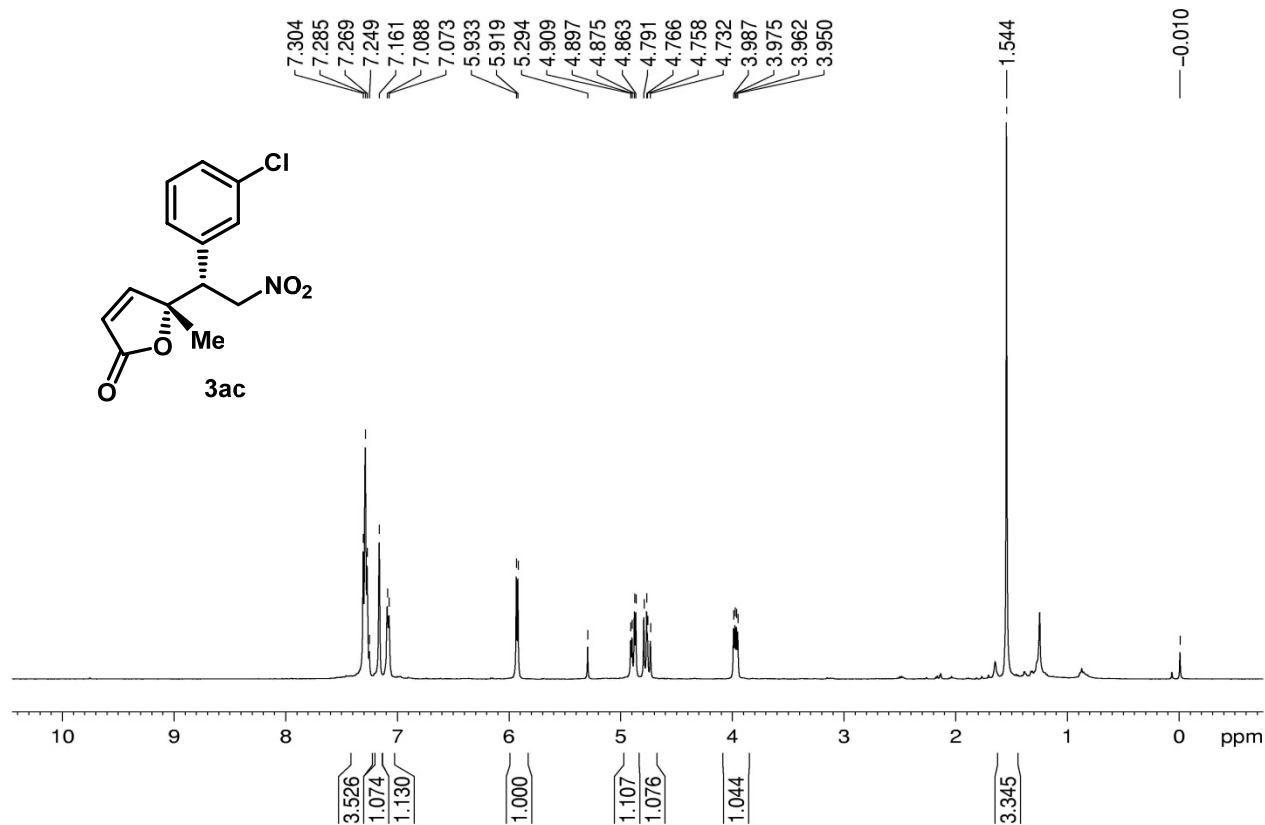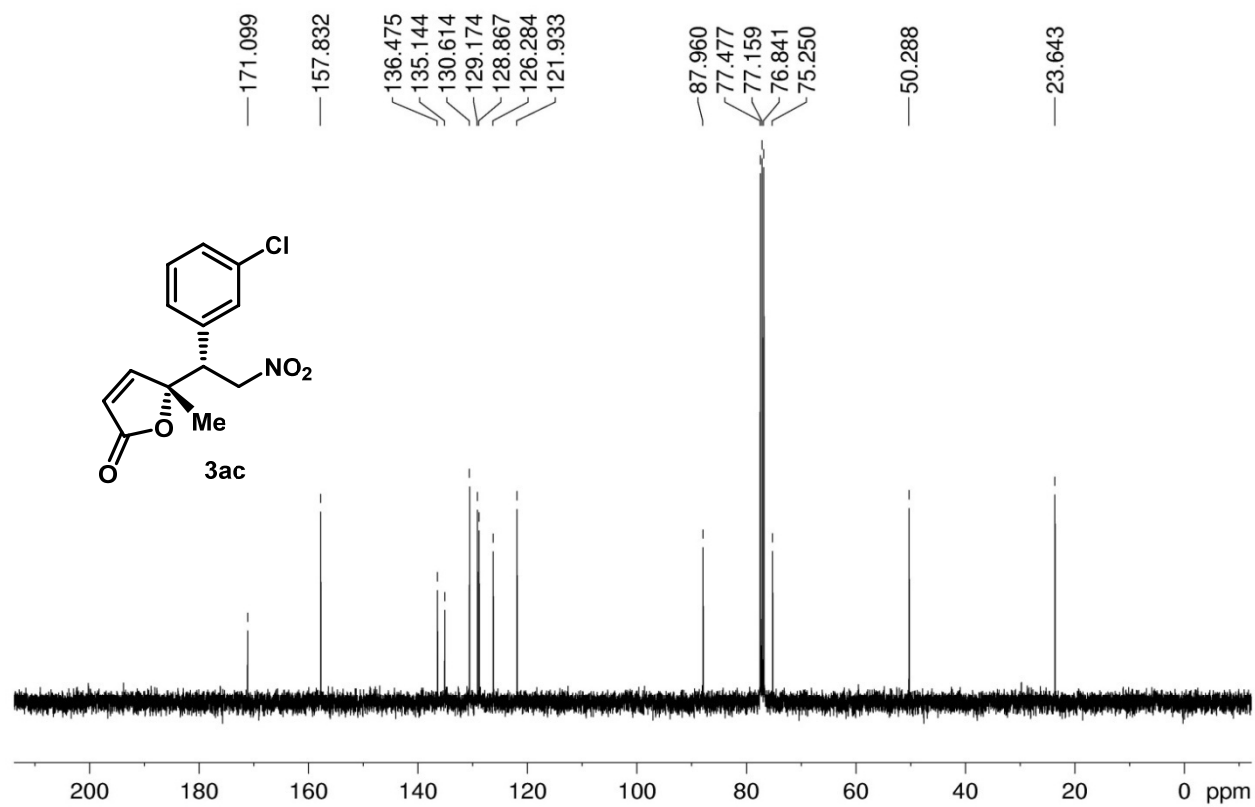

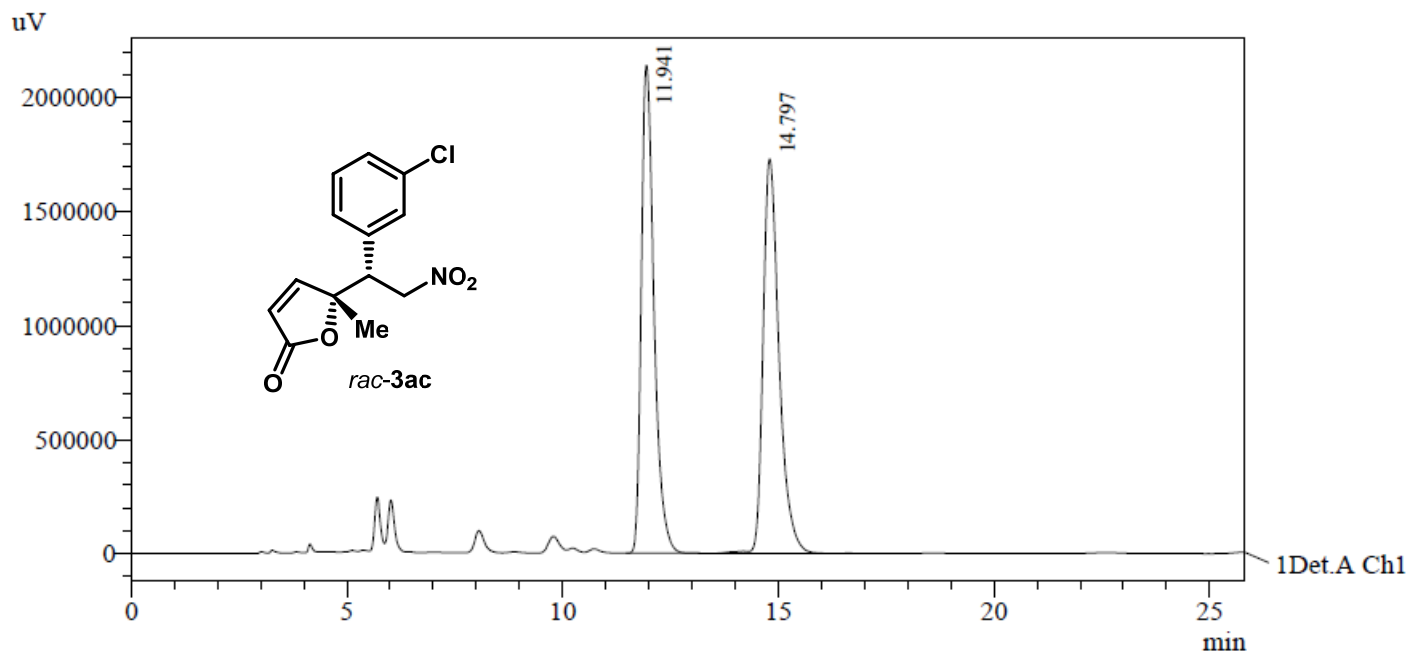

PeakTable

Detector A Ch1 210nm

| Peak# | Ret. Time | Area     | Area %  |
|-------|-----------|----------|---------|
| 1     | 11.941    | 43960741 | 49.744  |
| 2     | 14.797    | 44413168 | 50.256  |
| Total |           | 88373908 | 100.000 |

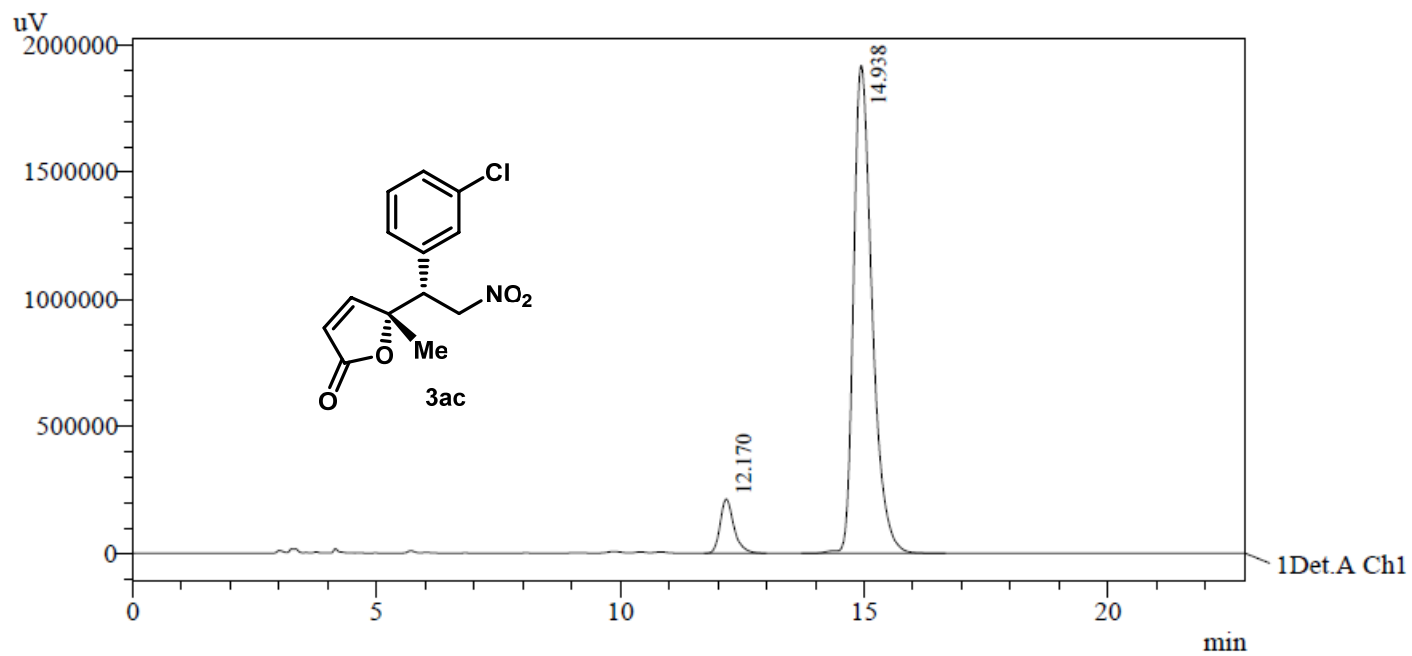

PeakTable

Detector A Ch1 210nm

| Peak# | Ret. Time | Area     | Area %  |
|-------|-----------|----------|---------|
| 1     | 12.170    | 4257631  | 7.716   |
| 2     | 14.938    | 50924123 | 92.284  |
| Total |           | 55181754 | 100.000 |

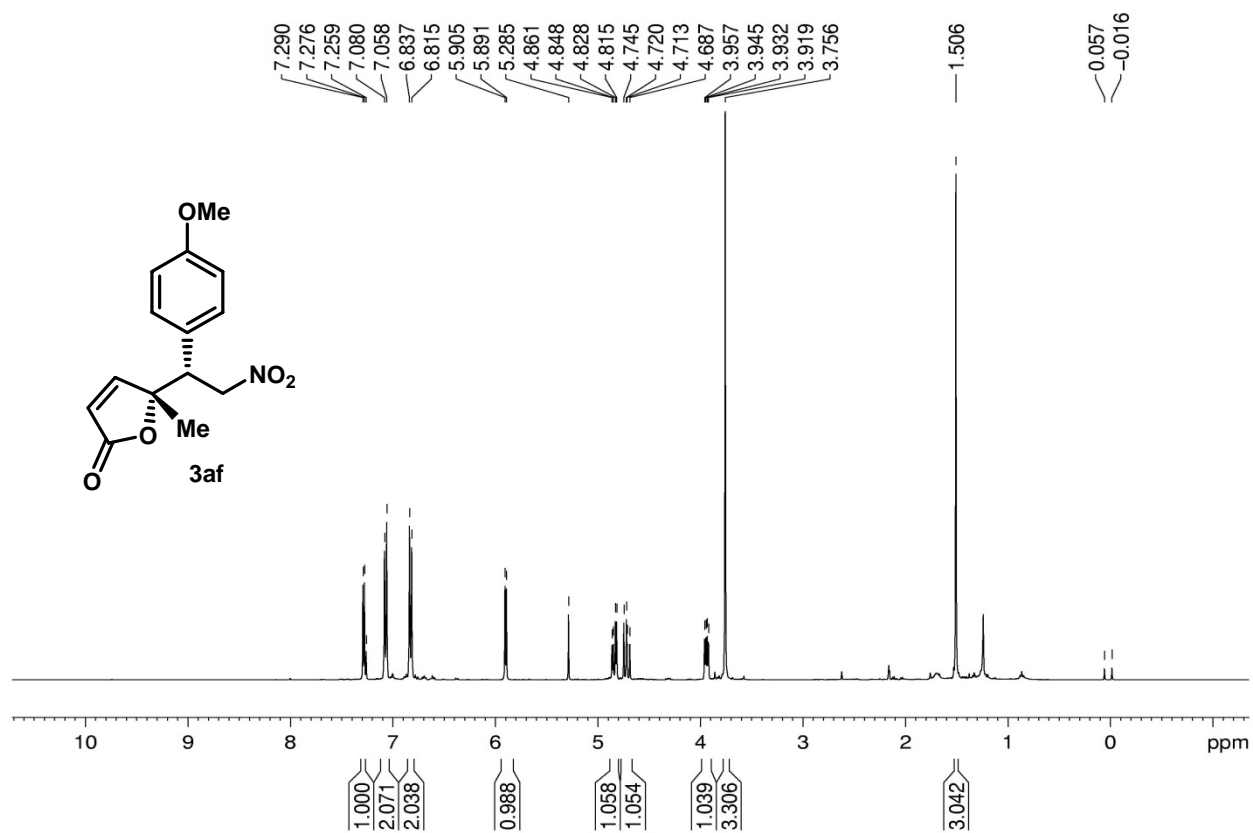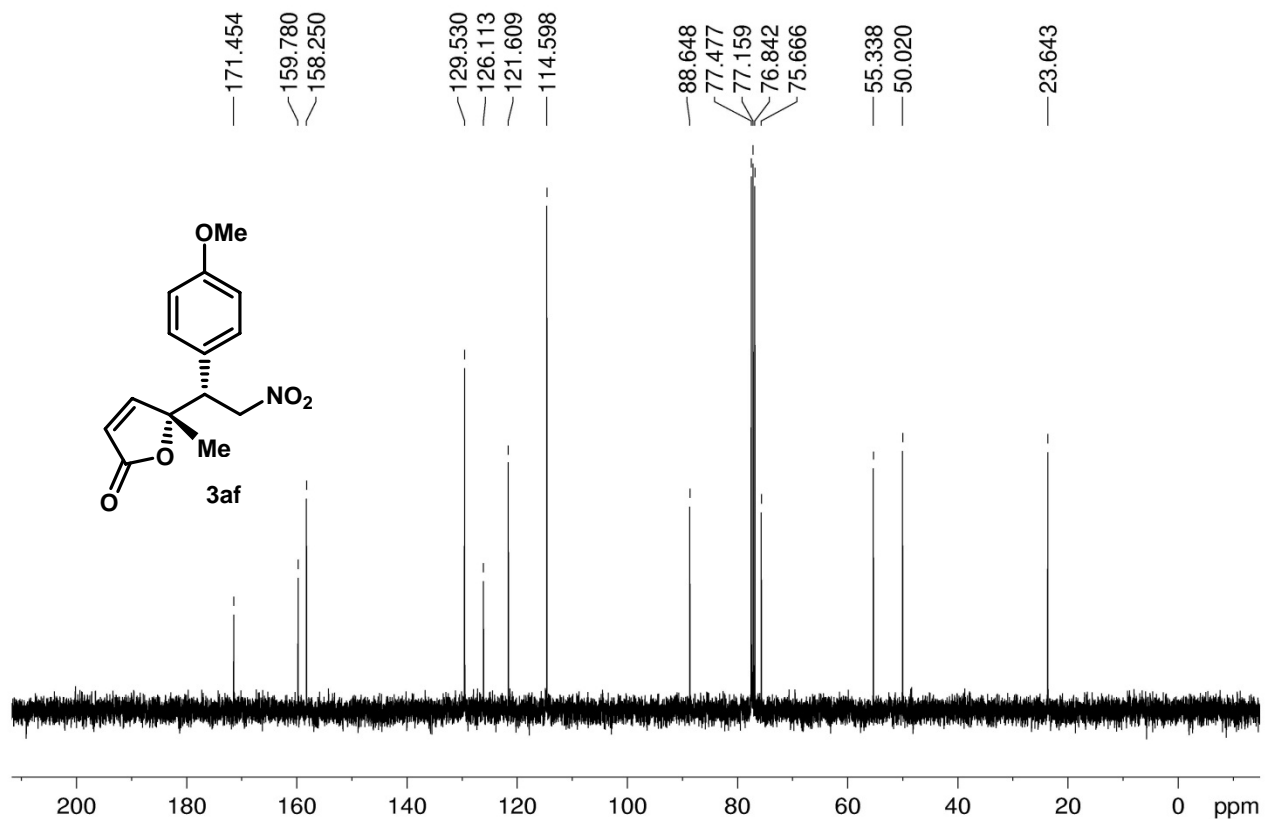

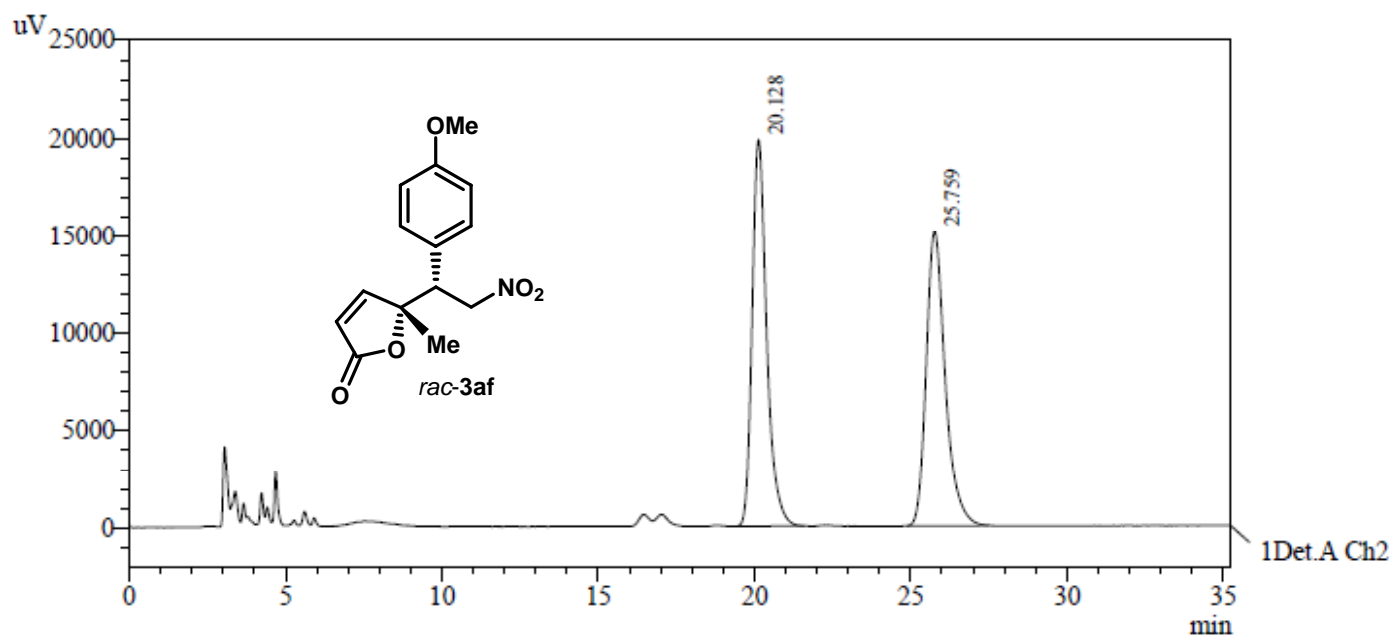

PeakTable

Detector A Ch2 254nm

| Peak# | Ret. Time | Area    | Area %  | Resolution |
|-------|-----------|---------|---------|------------|
| 1     | 20.128    | 642052  | 50.036  | 0.000      |
| 2     | 25.759    | 641120  | 49.964  | 5.948      |
| Total |           | 1283172 | 100.000 |            |

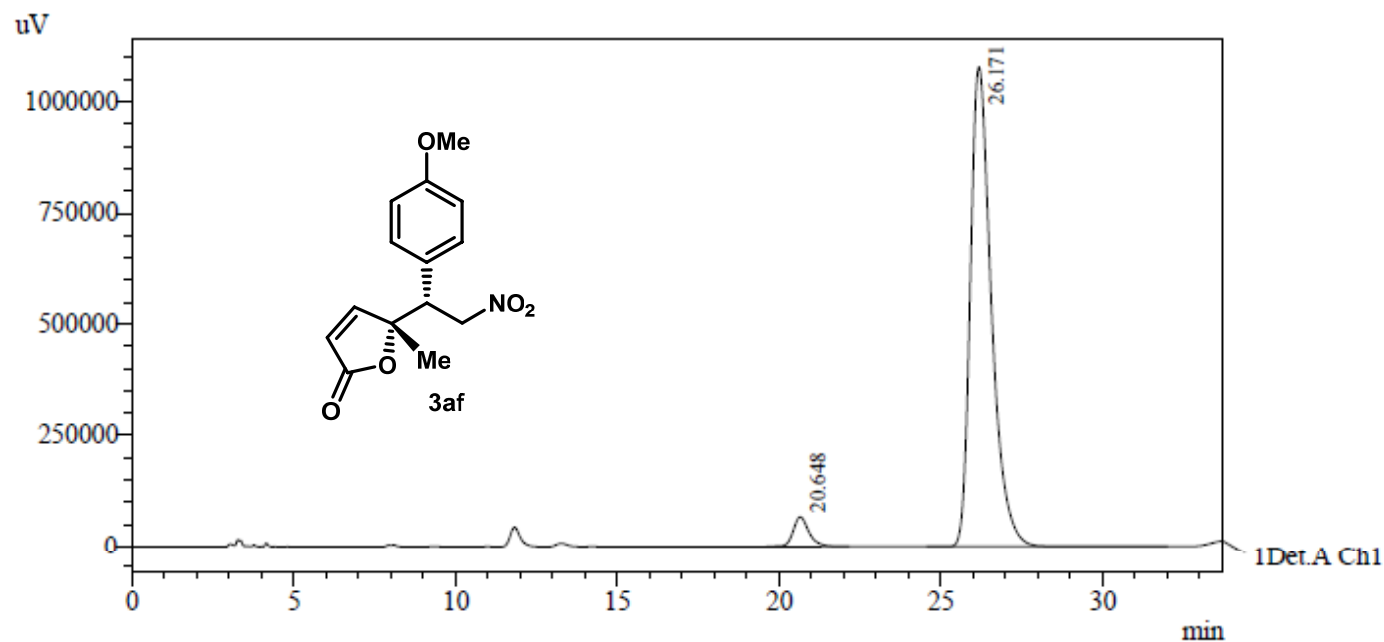

PeakTable

Detector A Ch1 210nm

| Peak# | Ret. Time | Area     | Area %  |
|-------|-----------|----------|---------|
| 1     | 20.648    | 2296603  | 4.498   |
| 2     | 26.171    | 48759494 | 95.502  |
| Total |           | 51056097 | 100.000 |

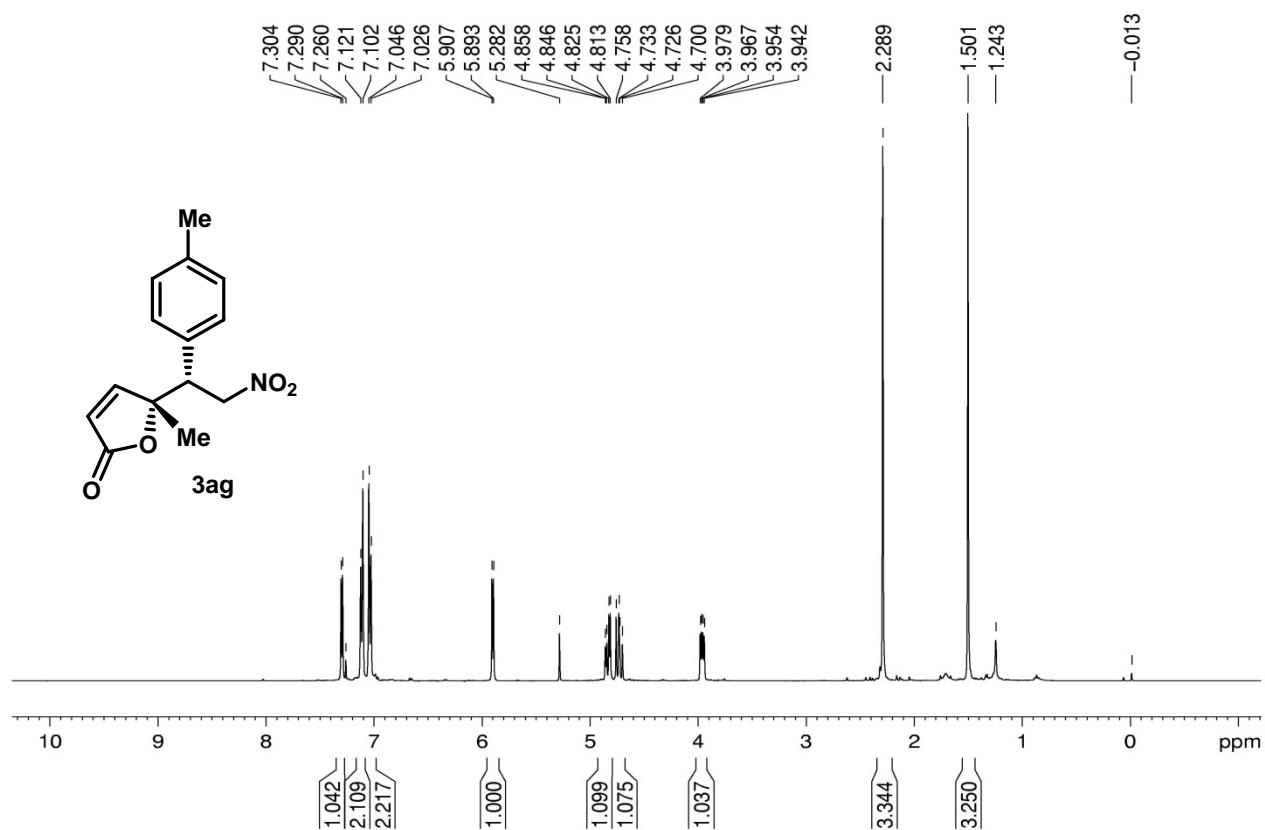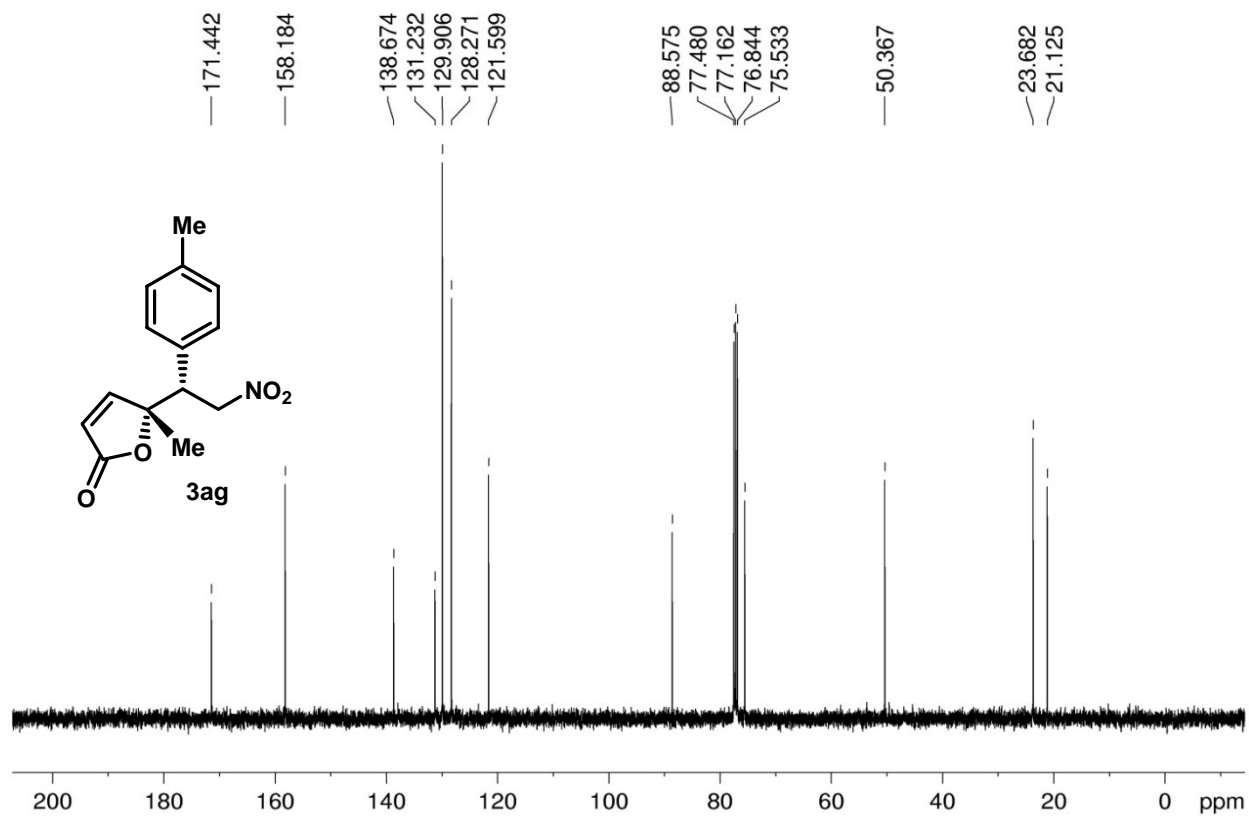

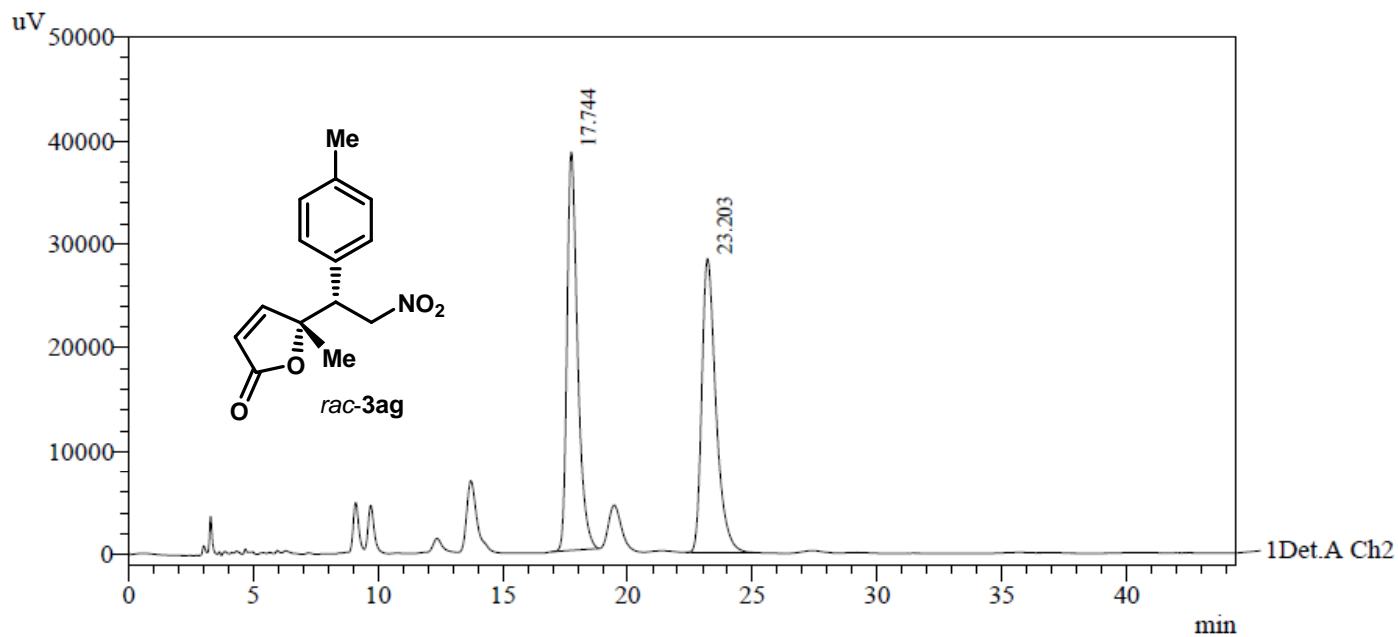

PeakTable

Detector A Ch2 254nm

| Peak# | Ret. Time | Area    | Area %  | Resolution |
|-------|-----------|---------|---------|------------|
| 1     | 17.744    | 1134434 | 50.290  | 0.000      |
| 2     | 23.203    | 1121345 | 49.710  | 6.220      |
| Total |           | 2255780 | 100.000 |            |

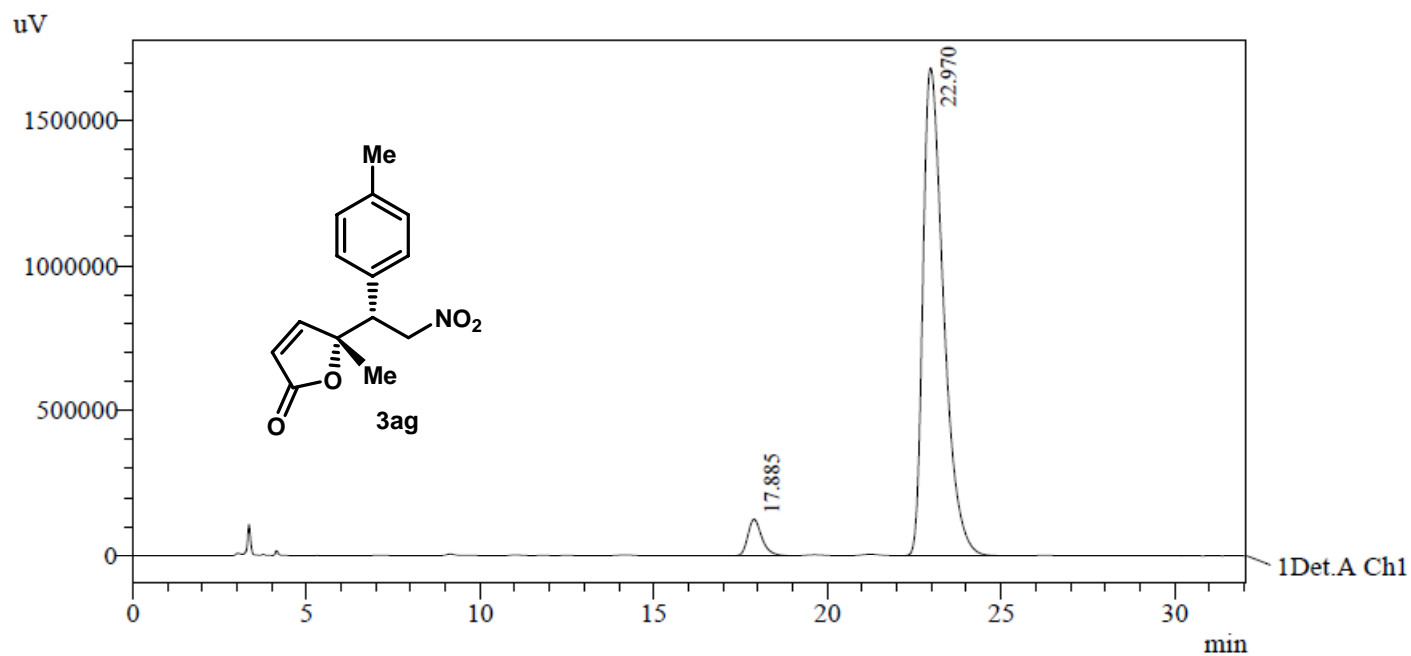

PeakTable

Detector A Ch1 210nm

| Peak# | Ret. Time | Area     | Area %  |
|-------|-----------|----------|---------|
| 1     | 17.885    | 3614947  | 4.946   |
| 2     | 22.970    | 69470195 | 95.054  |
| Total |           | 73085143 | 100.000 |

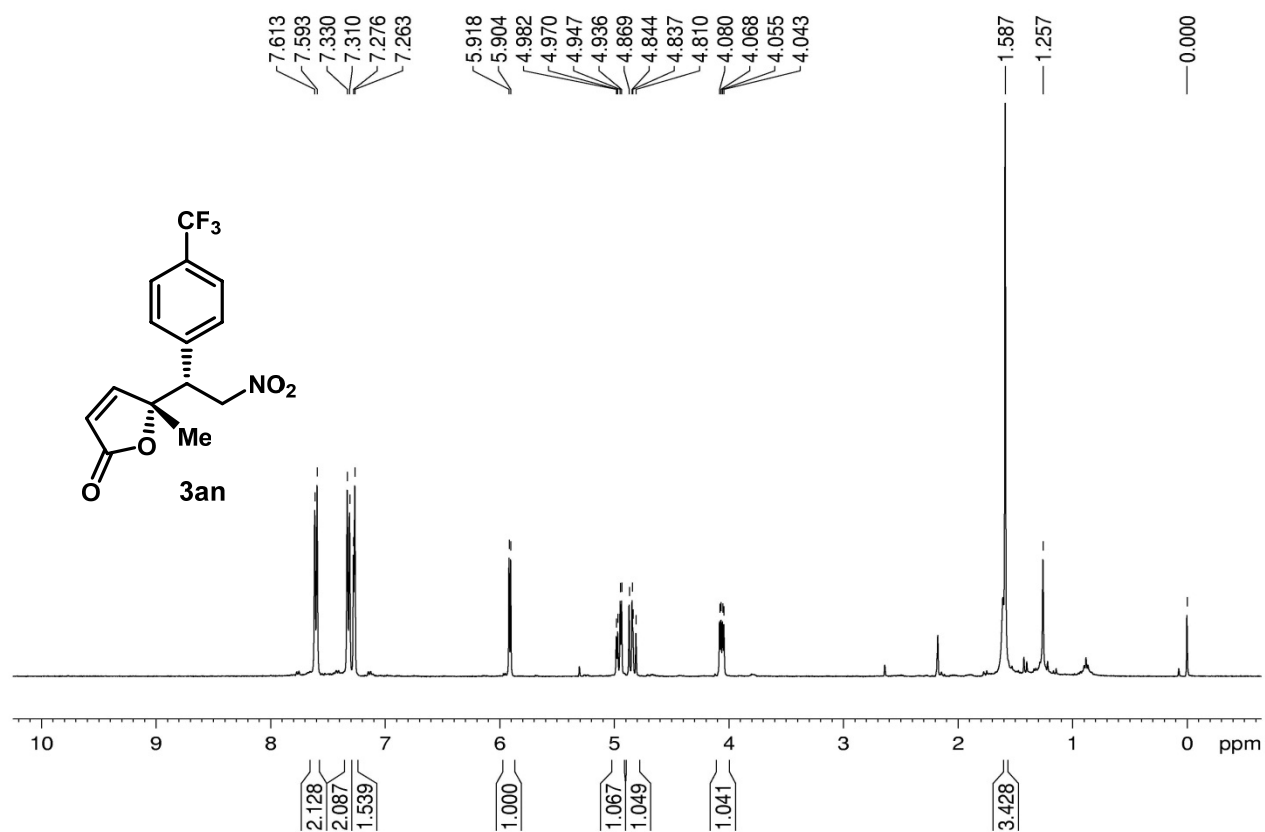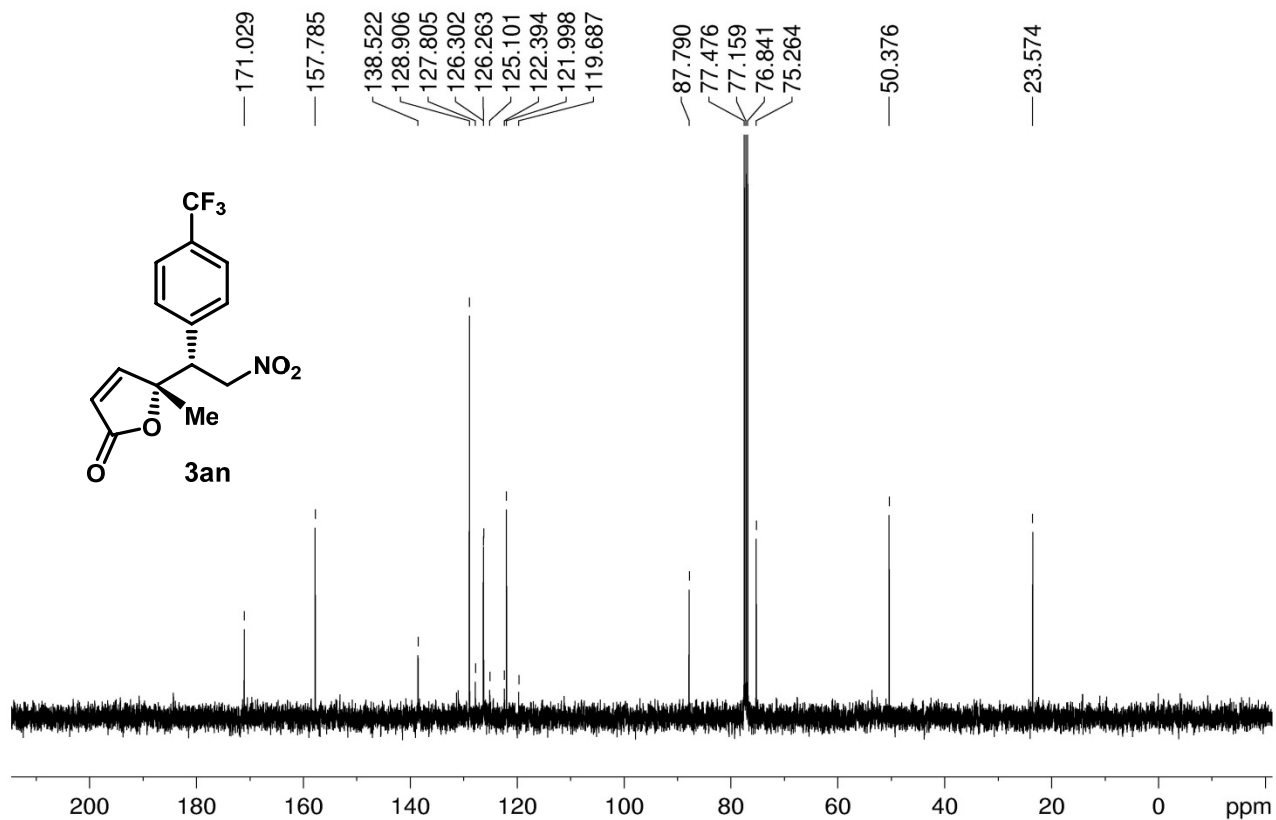

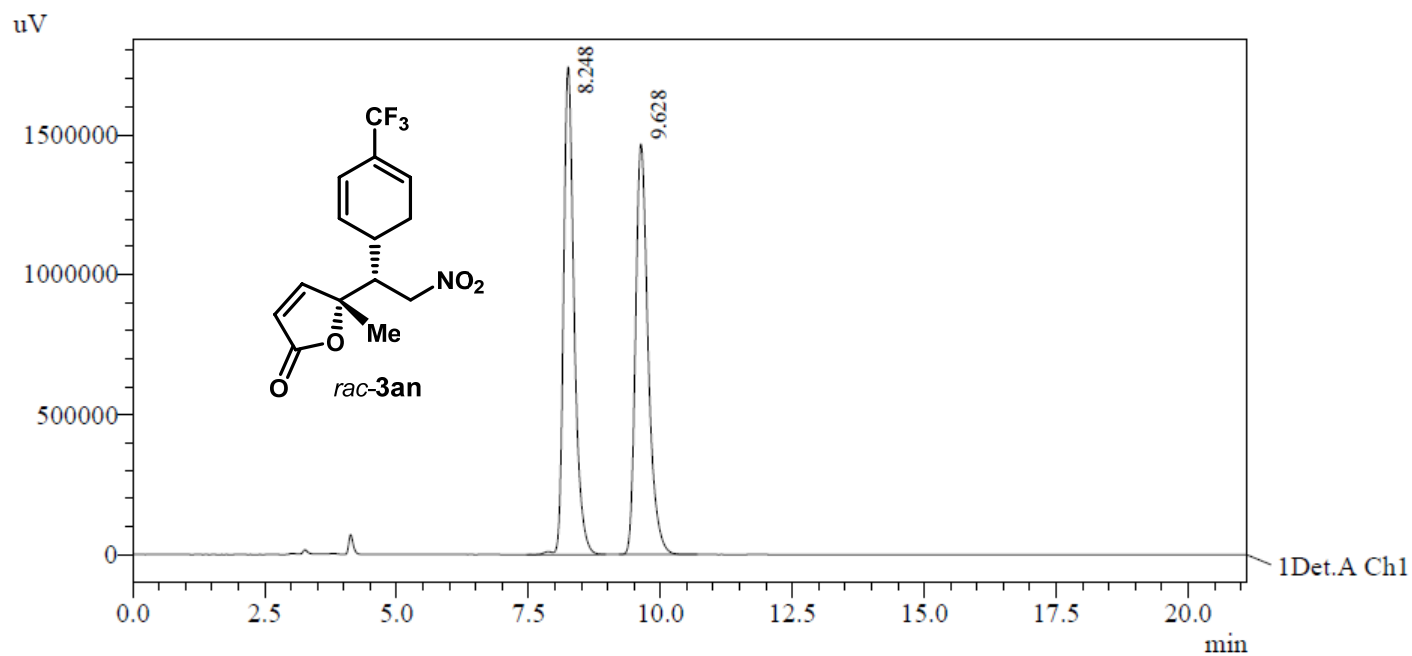

PeakTable

Detector A Ch1 210nm

| Peak# | Ret. Time | Area     | Area %  |
|-------|-----------|----------|---------|
| 1     | 8.248     | 24364501 | 50.067  |
| 2     | 9.628     | 24299158 | 49.933  |
| Total |           | 48663659 | 100.000 |

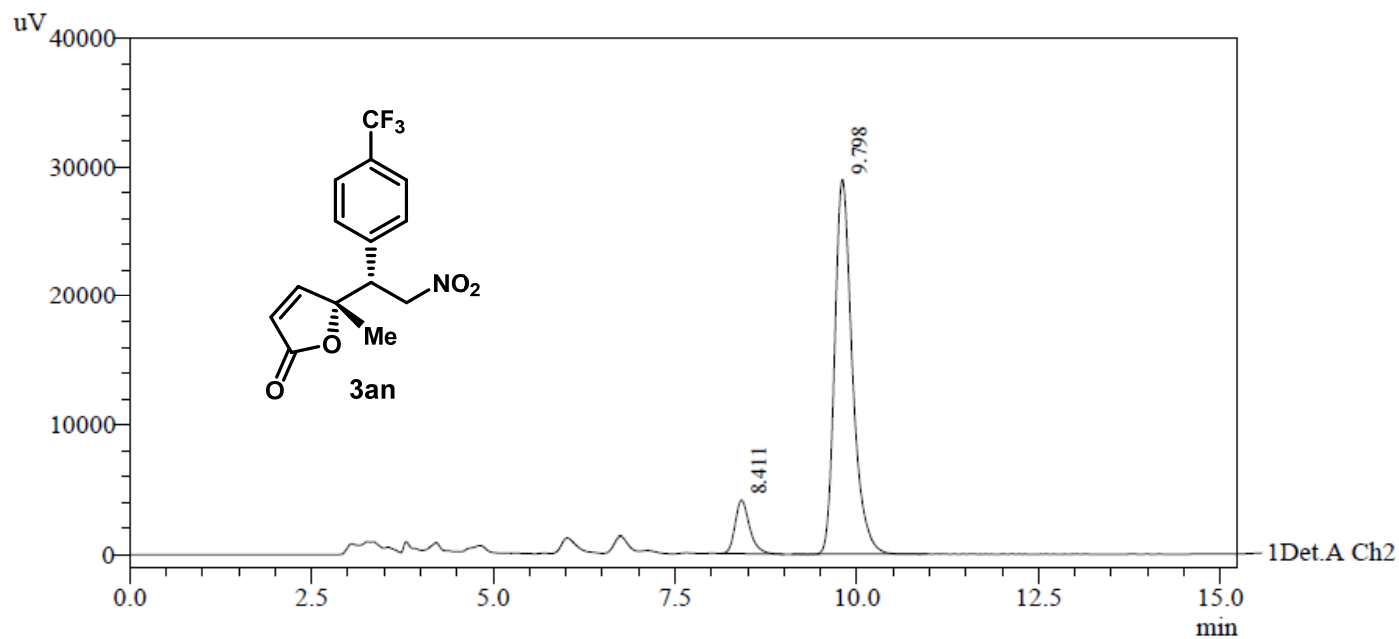

PeakTable

Detector A Ch2 254nm

| Peak# | Ret. Time | Area   | Area %  | Resolution |
|-------|-----------|--------|---------|------------|
| 1     | 8.411     | 56647  | 10.379  | 0.000      |
| 2     | 9.798     | 489118 | 89.621  | 3.491      |
| Total |           | 545765 | 100.000 |            |

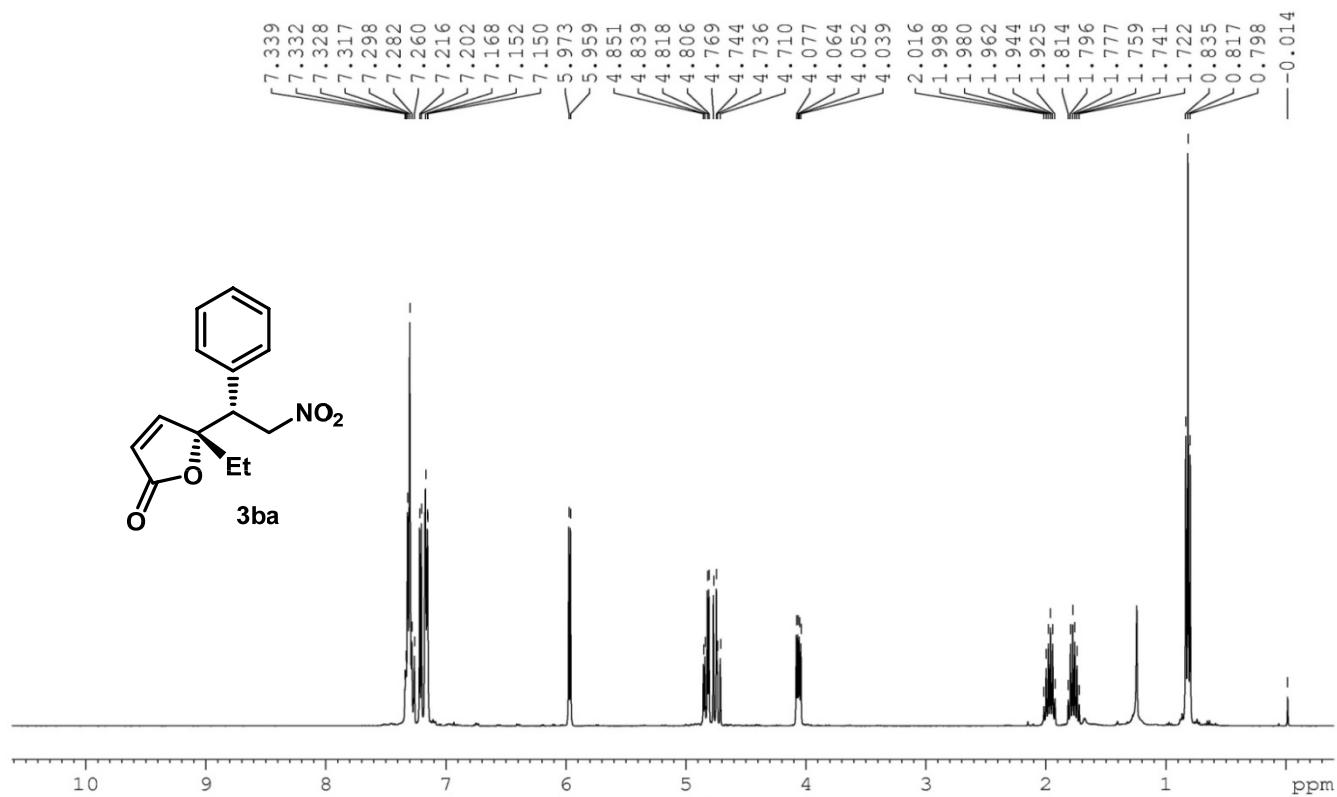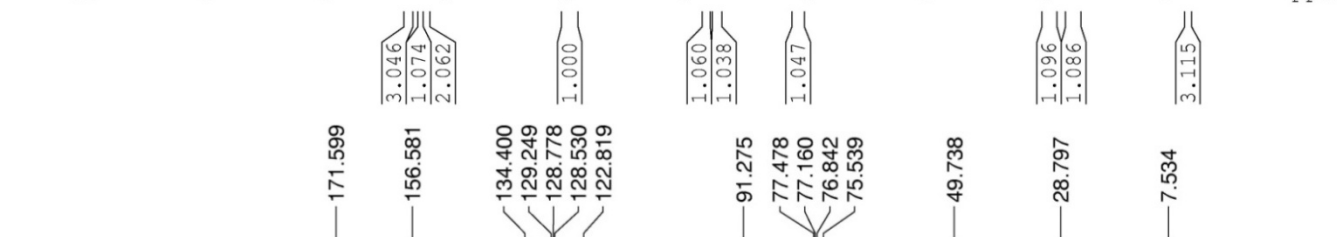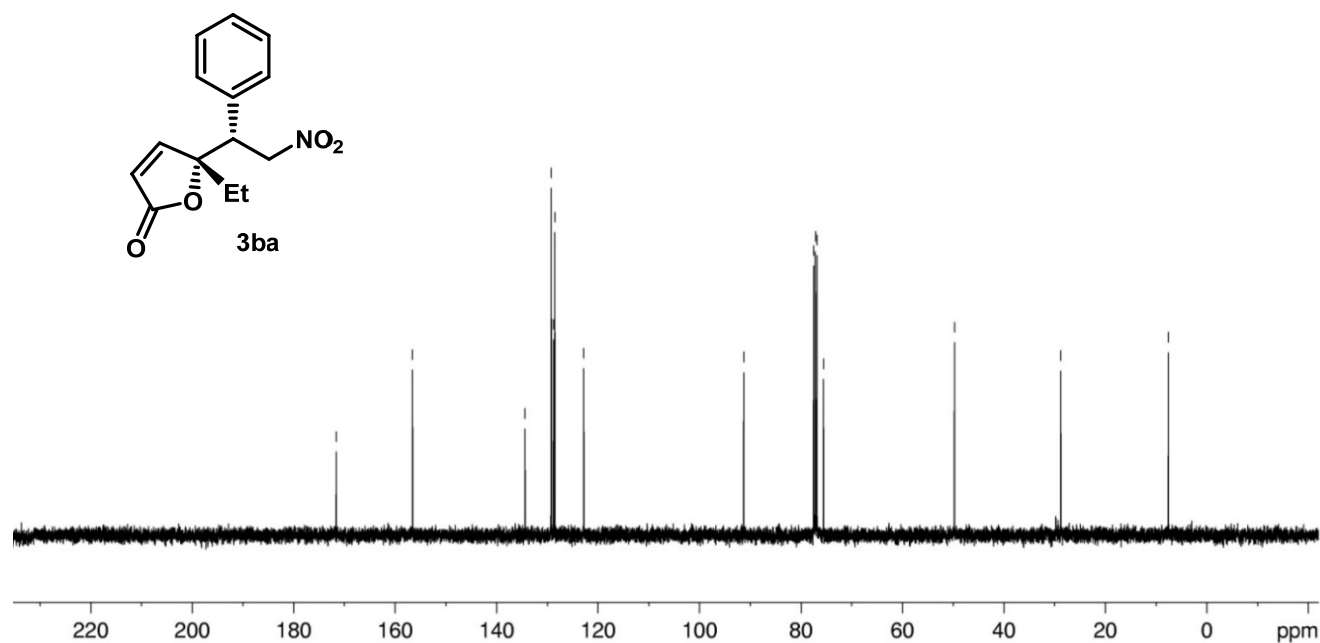

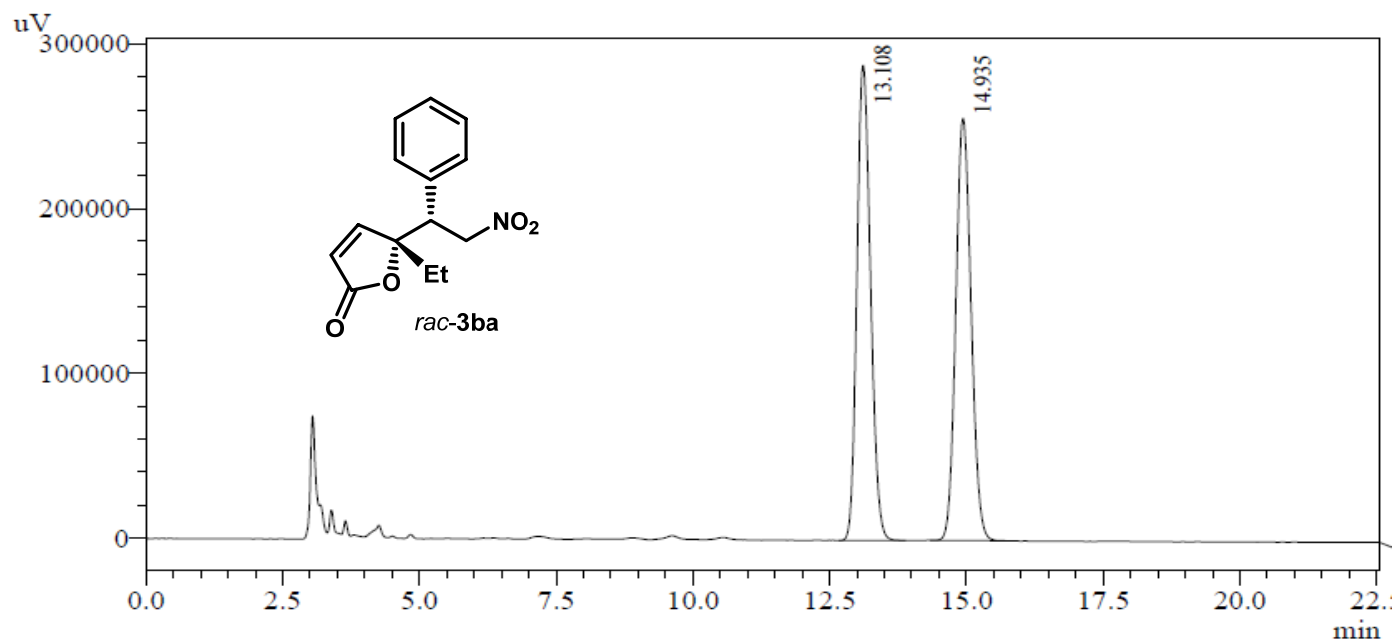

PeakTable

Detector A Ch1 210nm

| Peak# | Ret. Time | Area    | Area %  |
|-------|-----------|---------|---------|
| 1     | 13.108    | 4993852 | 50.044  |
| 2     | 14.935    | 4985067 | 49.956  |
| Total |           | 9978919 | 100.000 |

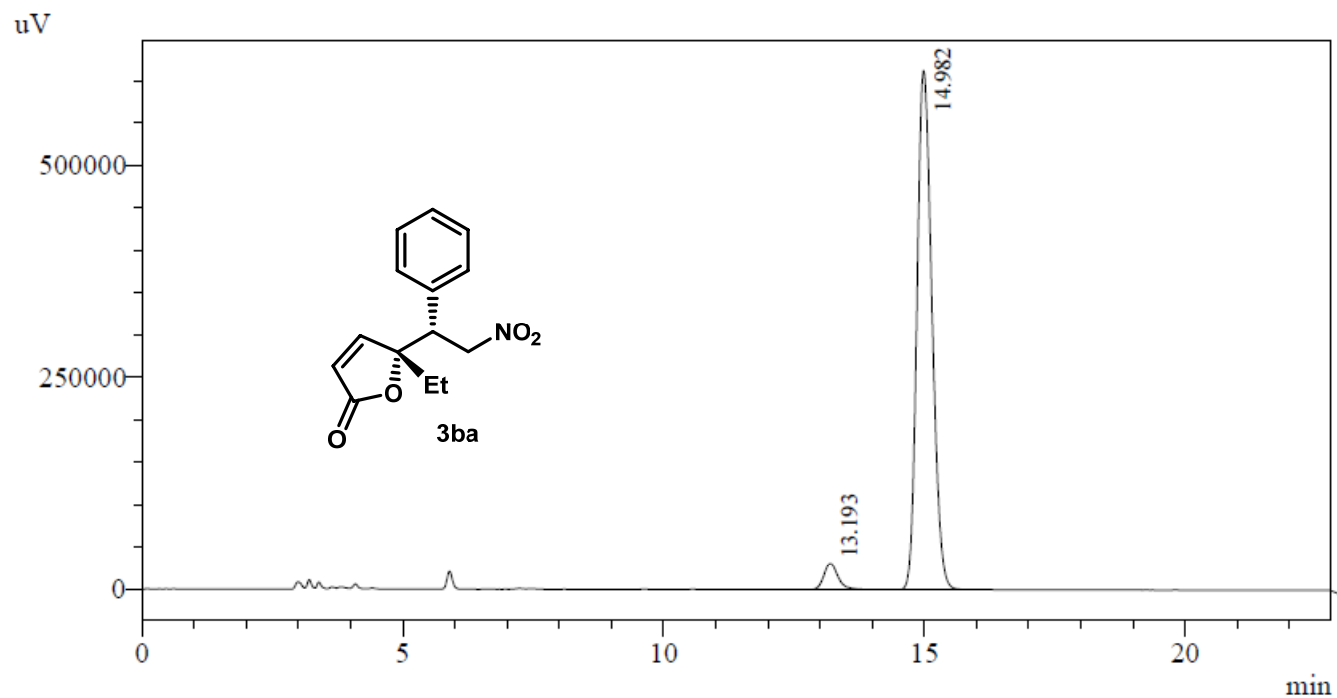

PeakTable

Detector A Ch1 210nm

| Peak# | Ret. Time | Area     | Area %  |
|-------|-----------|----------|---------|
| 1     | 13.193    | 574487   | 4.485   |
| 2     | 14.982    | 12234171 | 95.515  |
| Total |           | 12808658 | 100.000 |

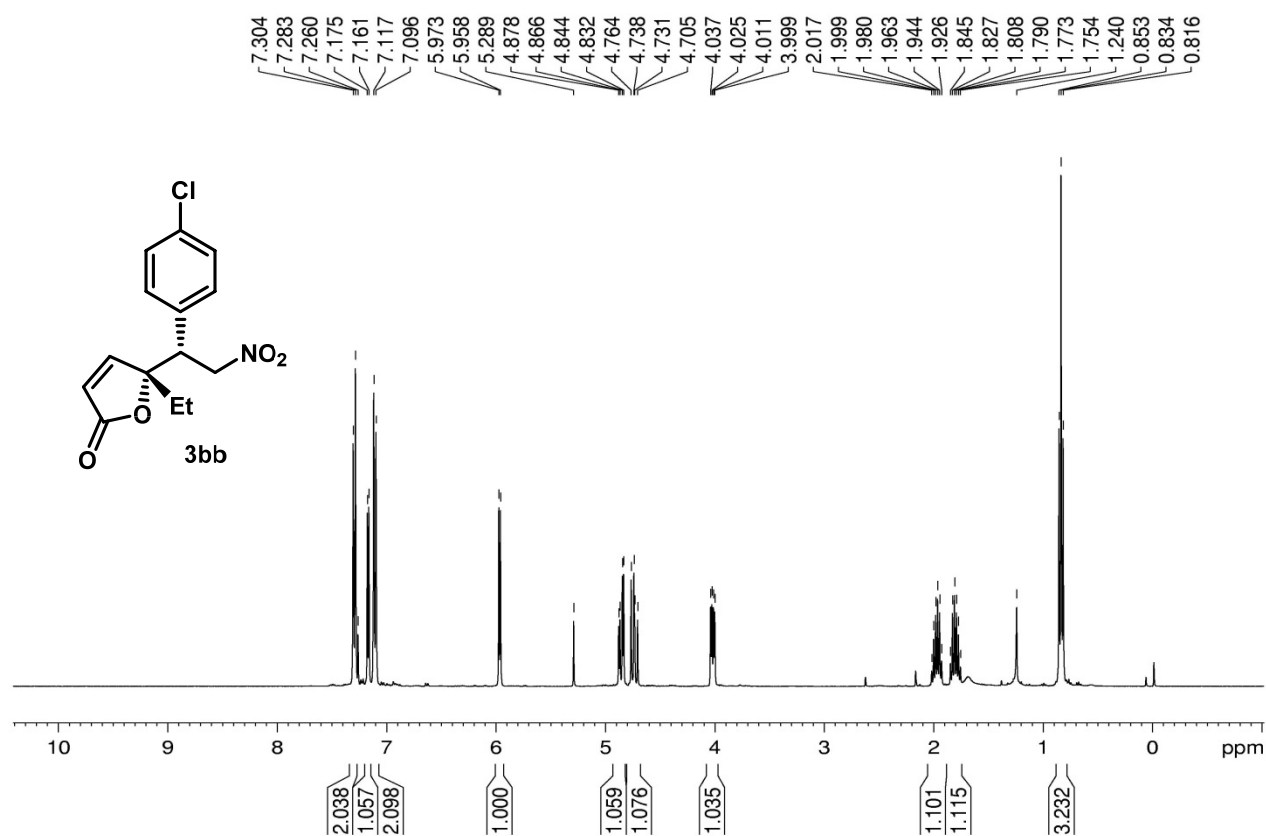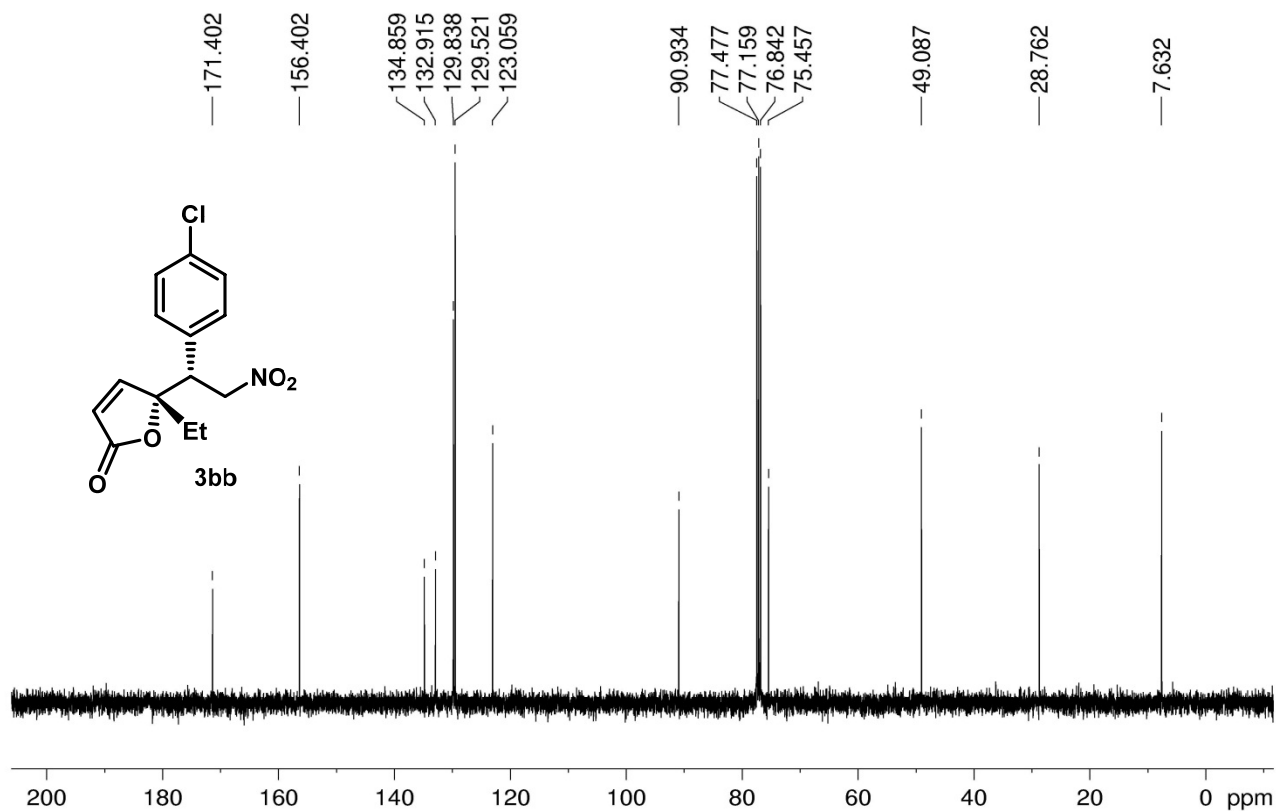

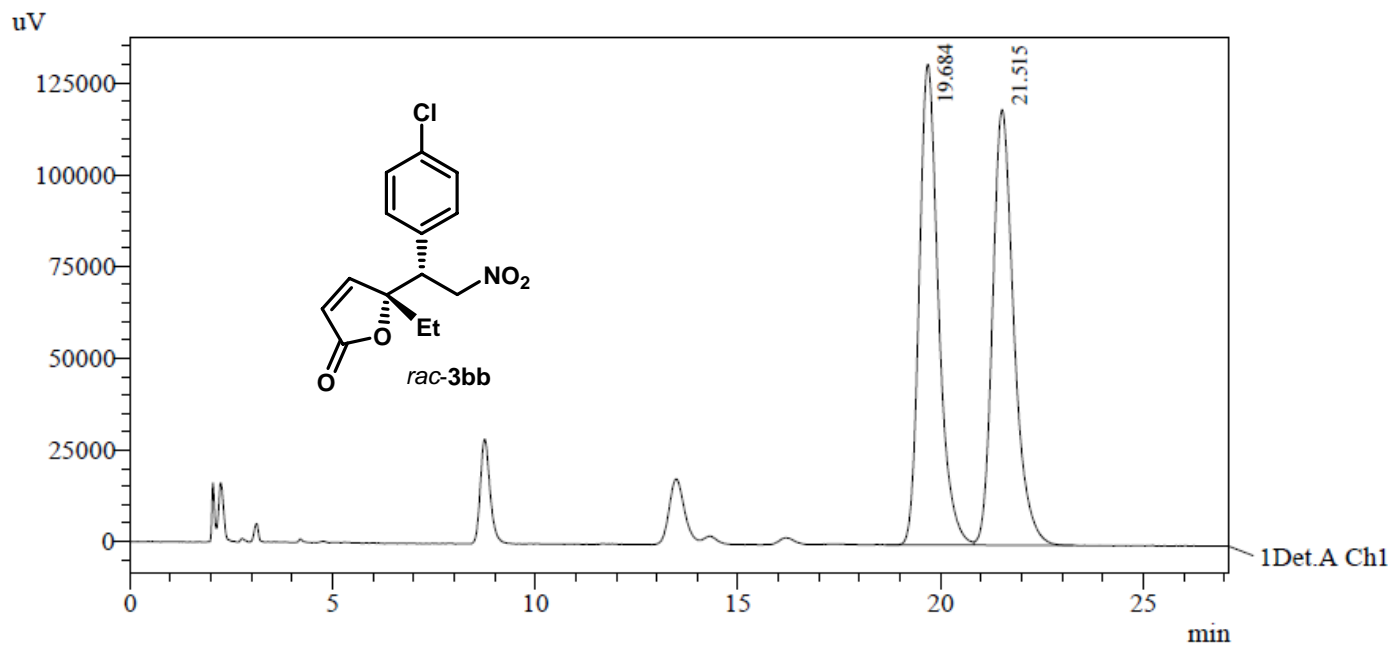

PeakTable

Detector A Ch1 210nm

| Peak# | Ret. Time | Area    | Area %  |
|-------|-----------|---------|---------|
| 1     | 19.684    | 4332915 | 49.956  |
| 2     | 21.515    | 4340460 | 50.044  |
| Total |           | 8673375 | 100.000 |

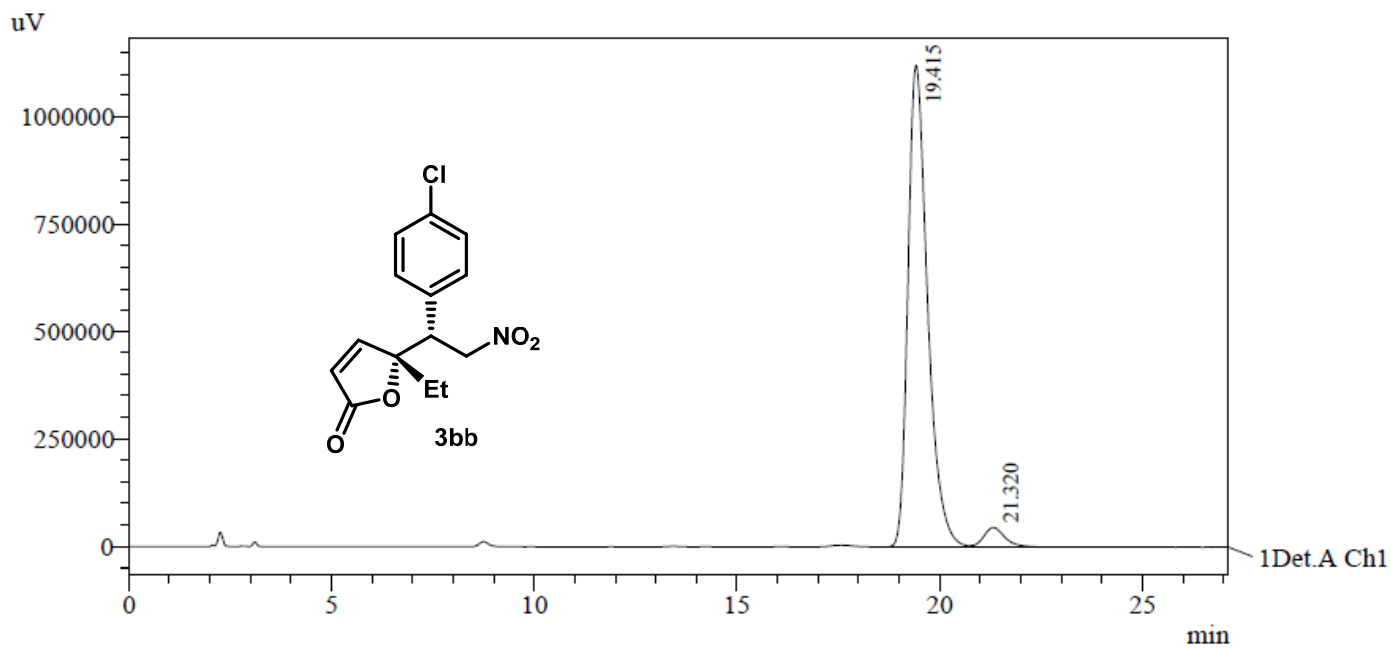

PeakTable

Detector A Ch1 210nm

| Peak# | Ret. Time | Area     | Area %  |
|-------|-----------|----------|---------|
| 1     | 19.415    | 37692542 | 95.920  |
| 2     | 21.320    | 1603100  | 4.080   |
| Total |           | 39295641 | 100.000 |

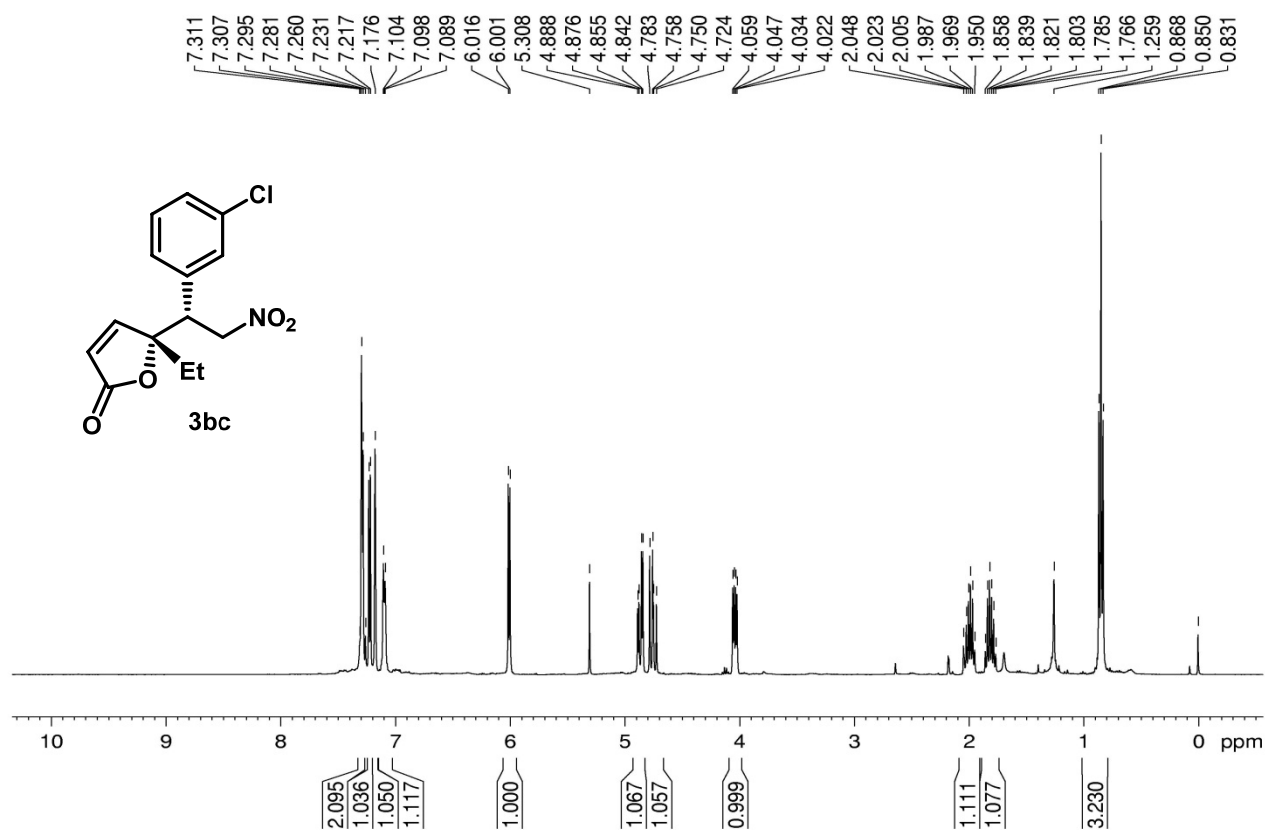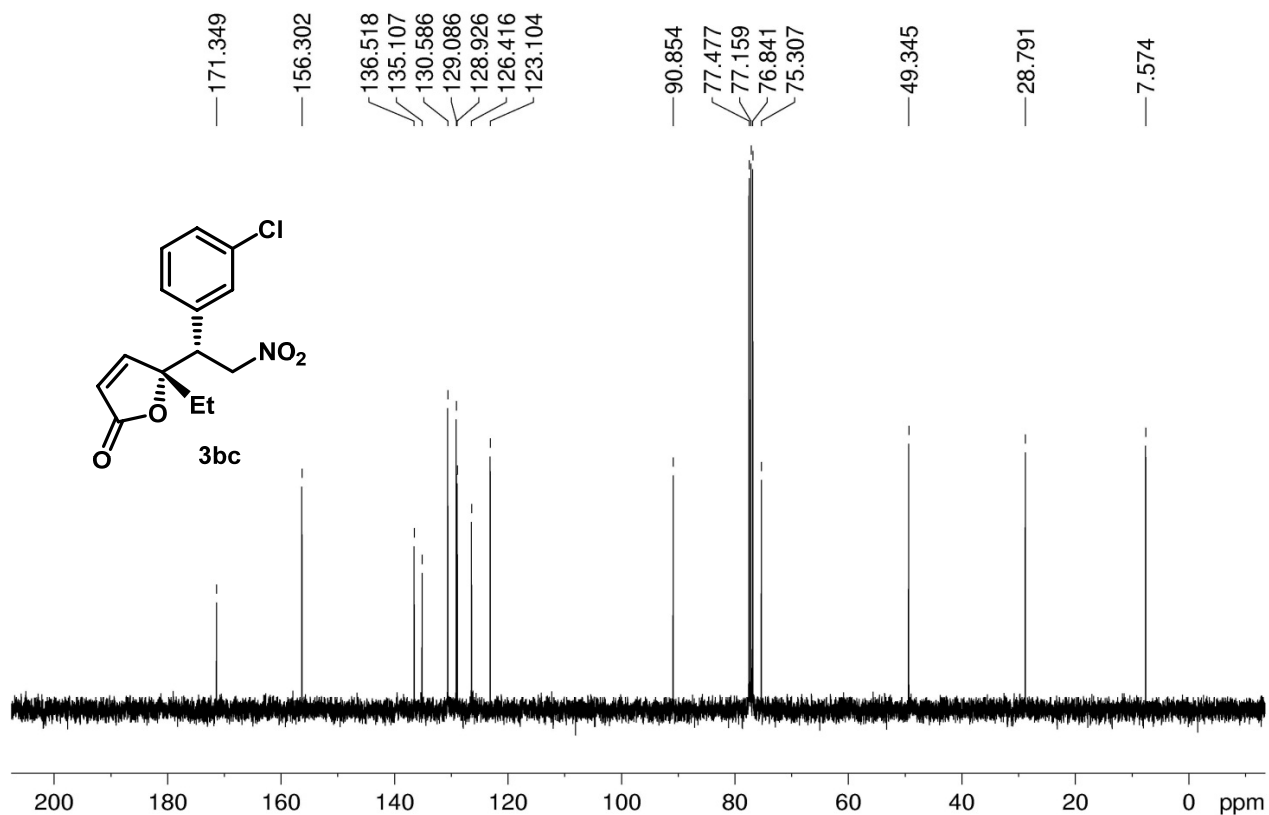

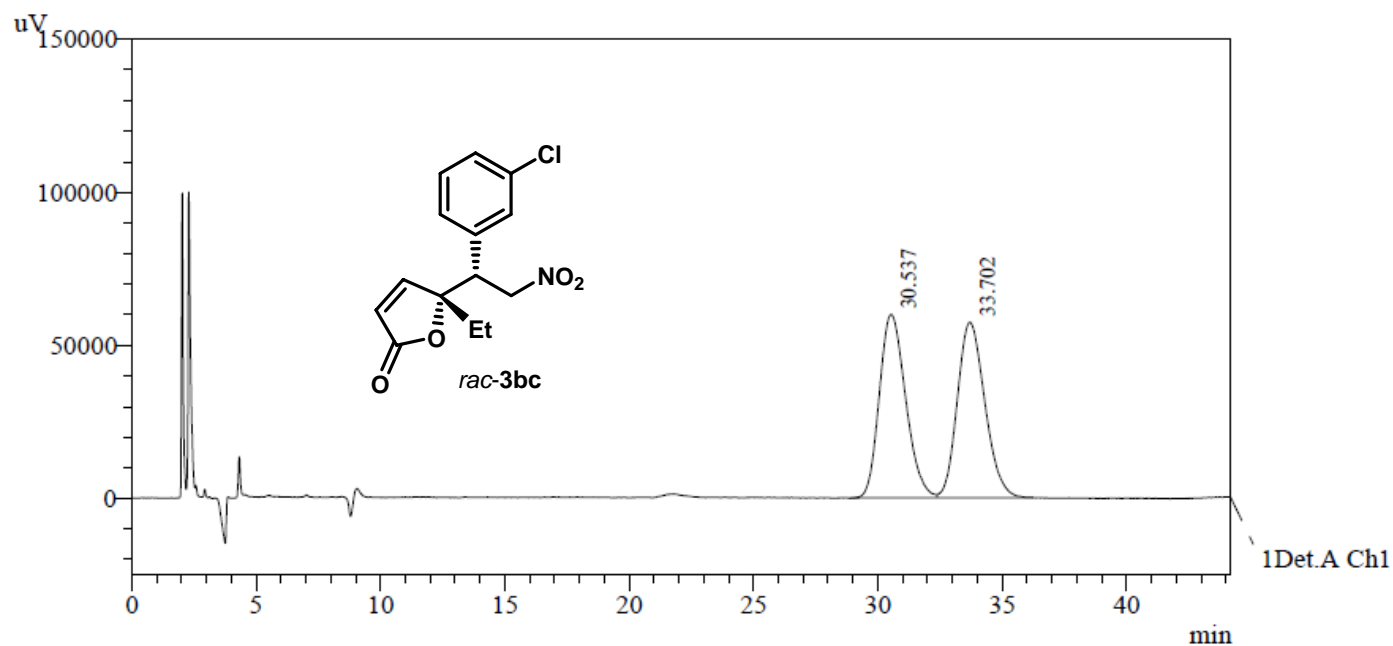

PeakTable

Detector A Ch1 210nm

| Peak# | Ret. Time | Area    | Area %  |
|-------|-----------|---------|---------|
| 1     | 30.537    | 4428476 | 49.979  |
| 2     | 33.702    | 4432269 | 50.021  |
| Total |           | 8860744 | 100.000 |

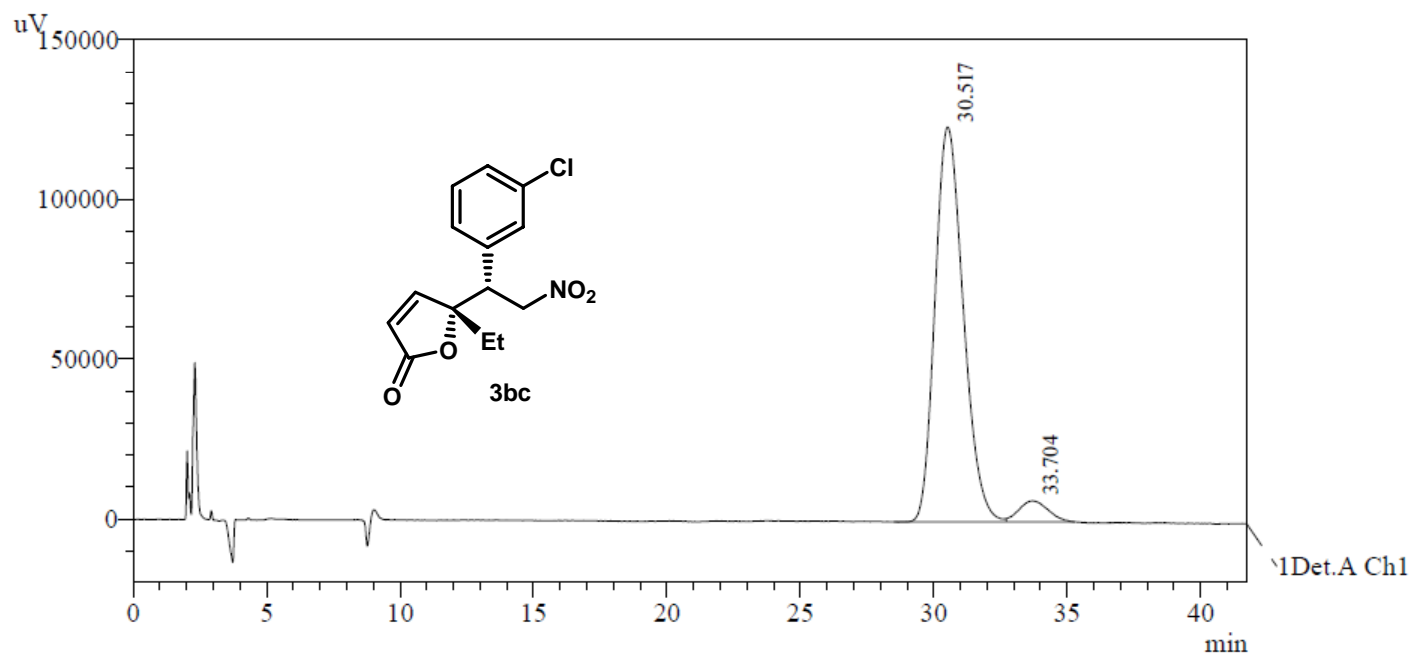

PeakTable

Detector A Ch1 210nm

| Peak# | Ret. Time | Area    | Area %  |
|-------|-----------|---------|---------|
| 1     | 30.517    | 9127889 | 94.743  |
| 2     | 33.704    | 506458  | 5.257   |
| Total |           | 9634348 | 100.000 |

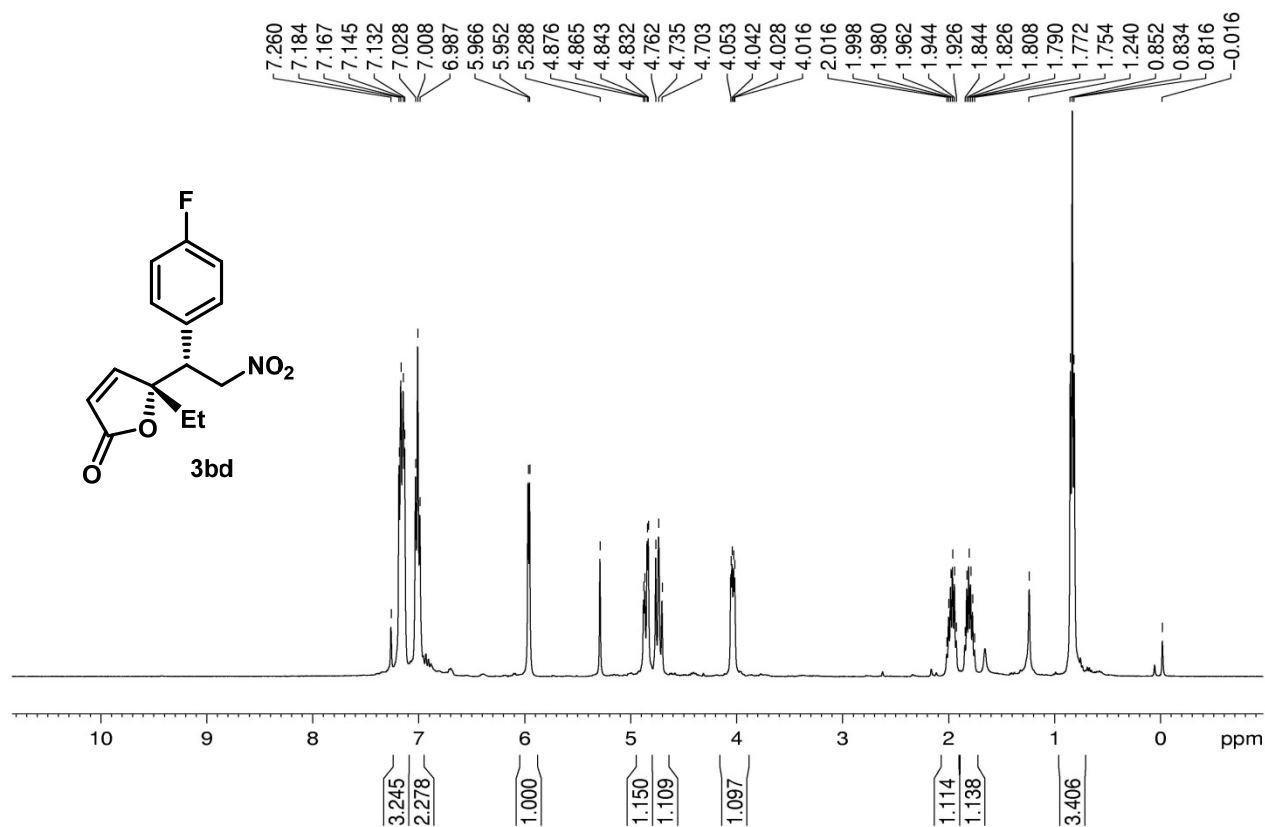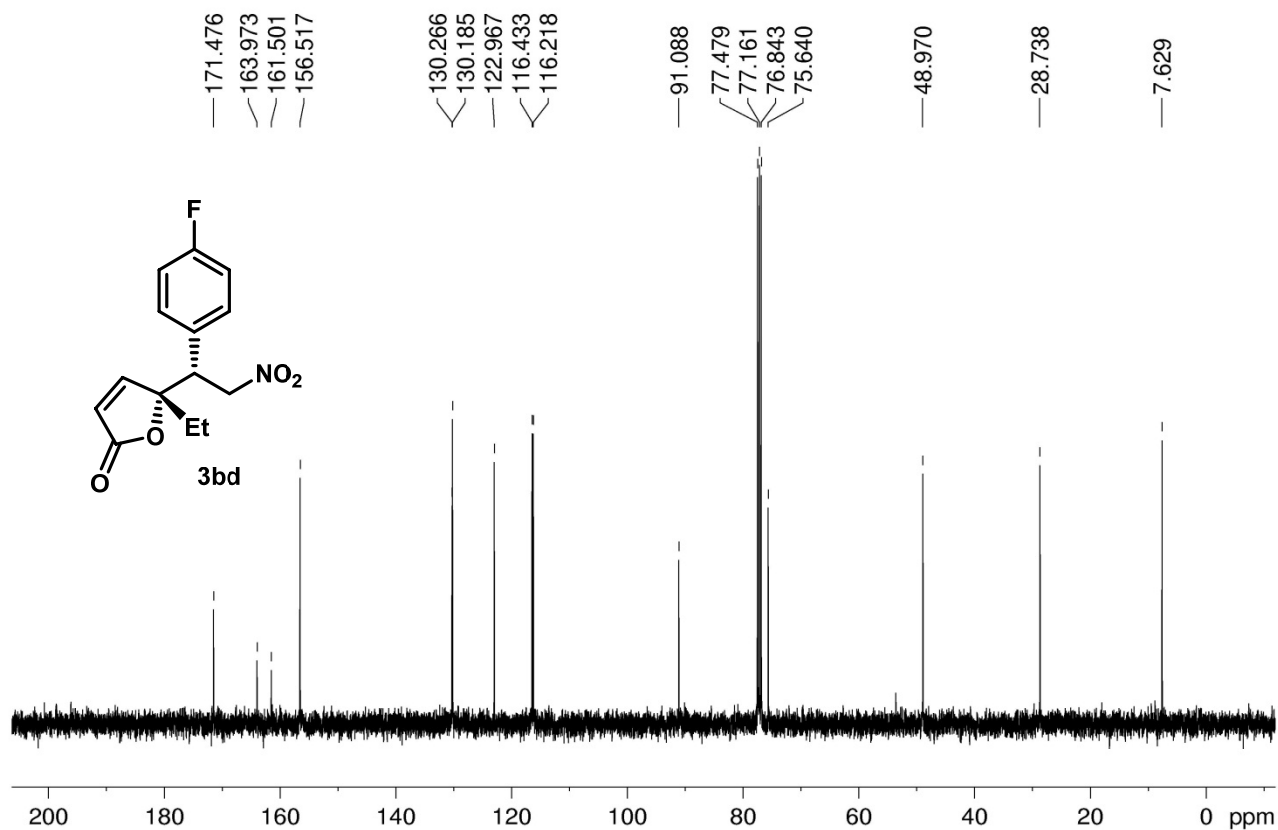

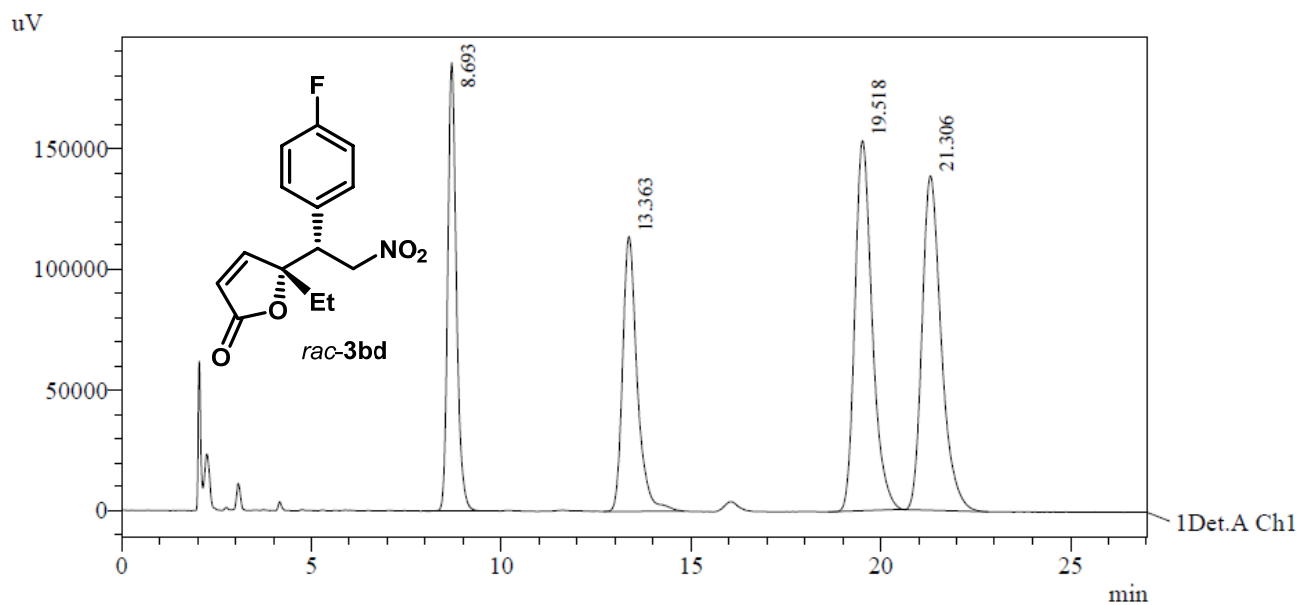

PeakTable

Detector A Ch1 210nm

| Peak# | Ret. Time | Area     | Area %  |
|-------|-----------|----------|---------|
| 1     | 8.693     | 2946077  | 18.691  |
| 2     | 13.363    | 3050442  | 19.353  |
| 3     | 19.518    | 4876050  | 30.936  |
| 4     | 21.306    | 4889324  | 31.020  |
| Total |           | 15761893 | 100.000 |

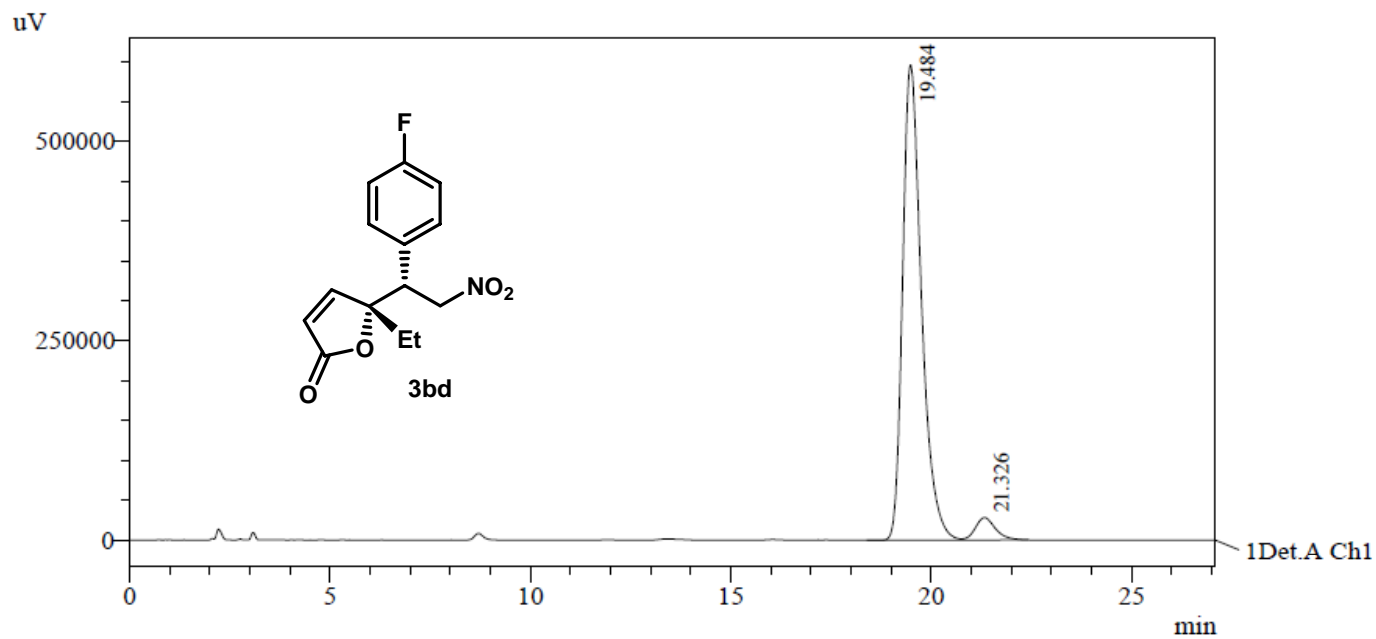

PeakTable

Detector A Ch1 210nm

| Peak# | Ret. Time | Area     | Area %  |
|-------|-----------|----------|---------|
| 1     | 19.484    | 19543704 | 95.242  |
| 2     | 21.326    | 976247   | 4.758   |
| Total |           | 20519951 | 100.000 |

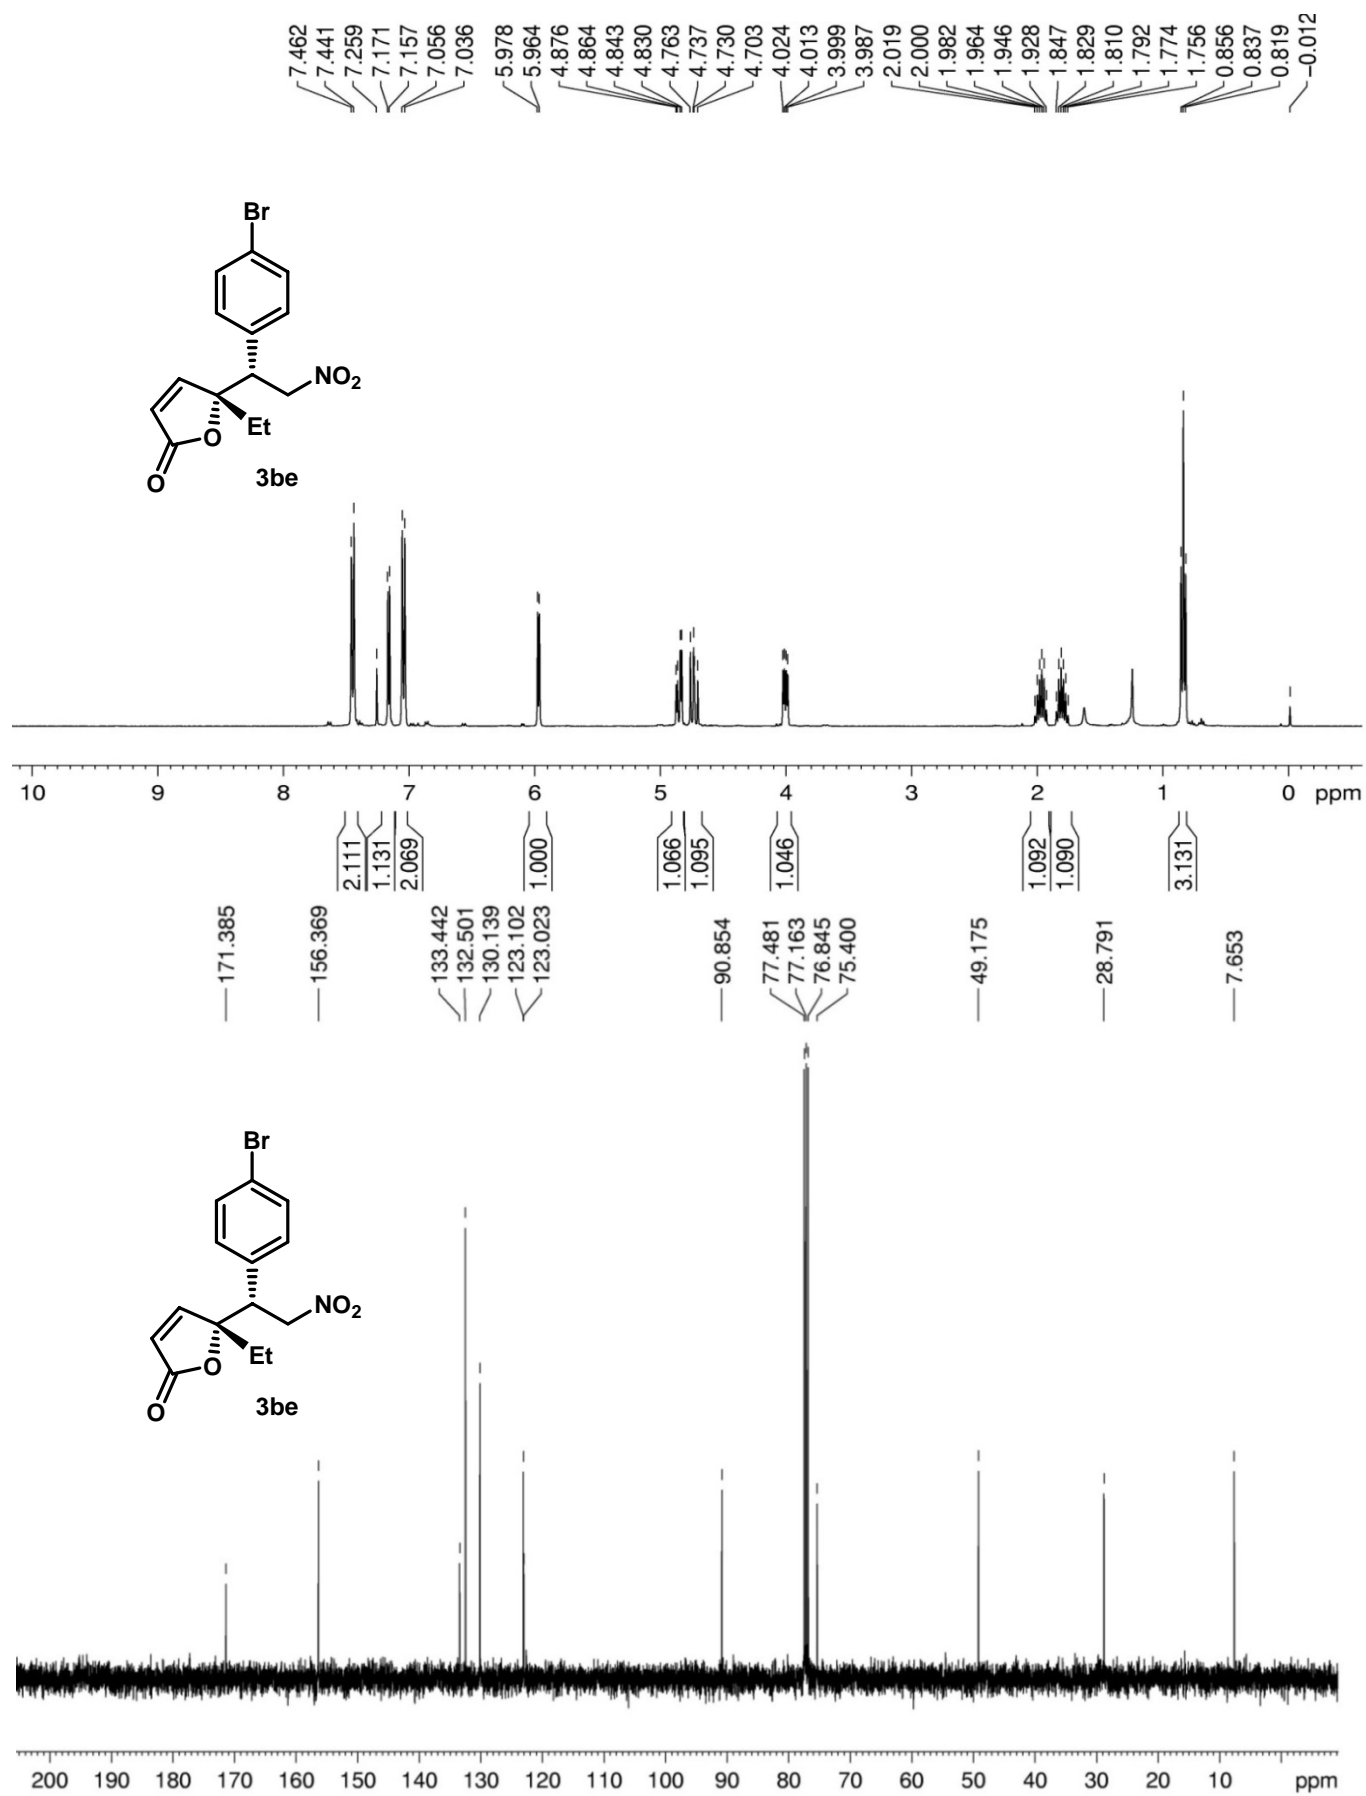

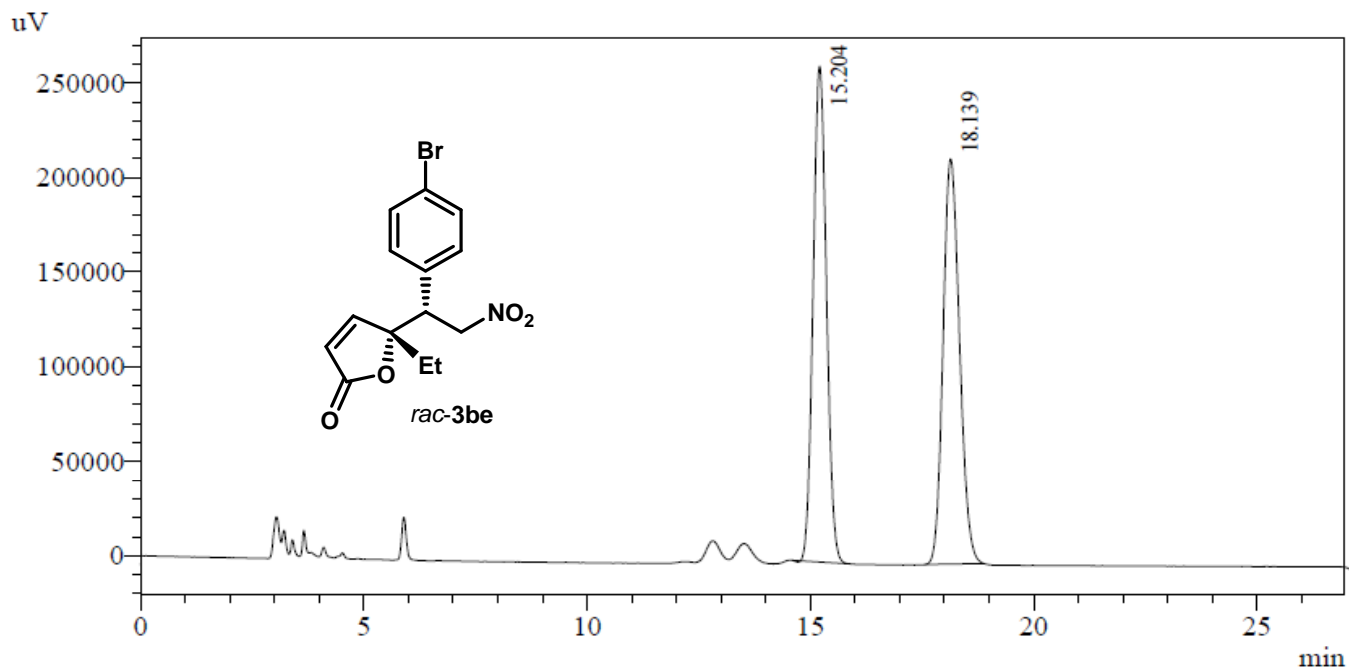

PeakTable

Detector A Ch1 210nm

| Peak# | Ret. Time | Area     | Area %  |
|-------|-----------|----------|---------|
| 1     | 15.204    | 5423316  | 49.659  |
| 2     | 18.139    | 5497726  | 50.341  |
| Total |           | 10921041 | 100.000 |

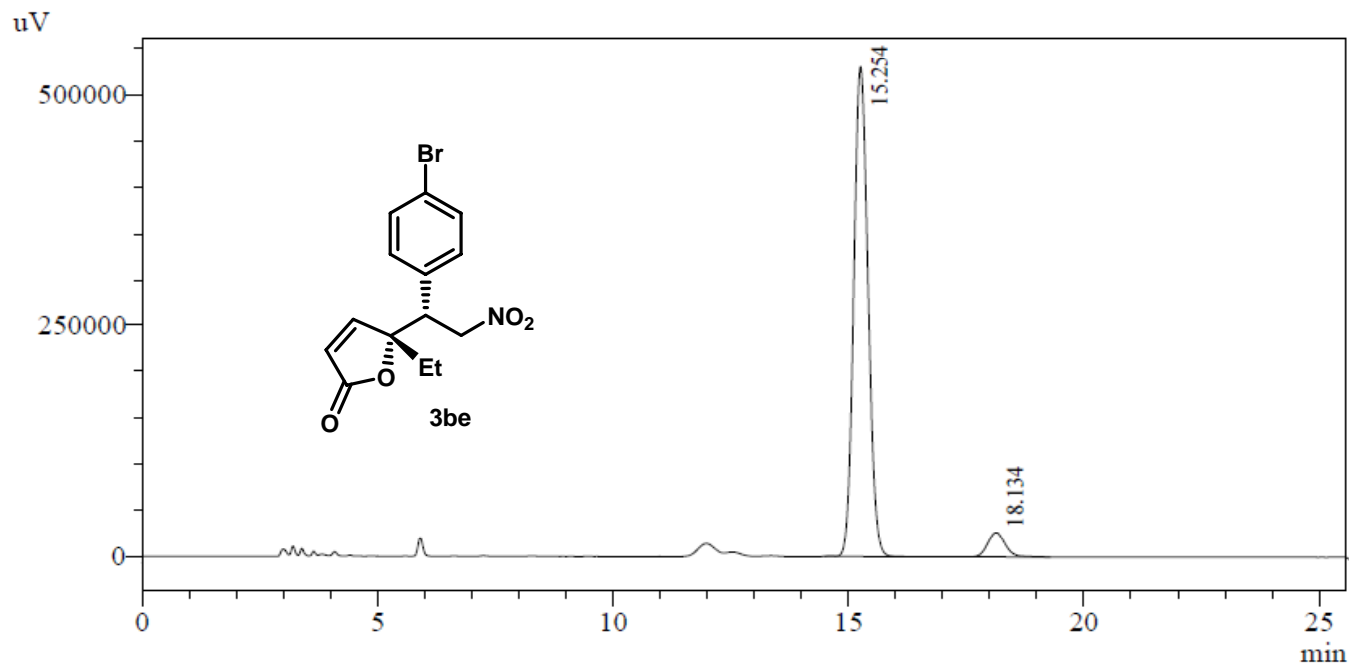

PeakTable

Detector A Ch1 210nm

| Peak# | Ret. Time | Area     | Area %  |
|-------|-----------|----------|---------|
| 1     | 15.254    | 11192758 | 94.144  |
| 2     | 18.134    | 696265   | 5.856   |
| Total |           | 11889023 | 100.000 |

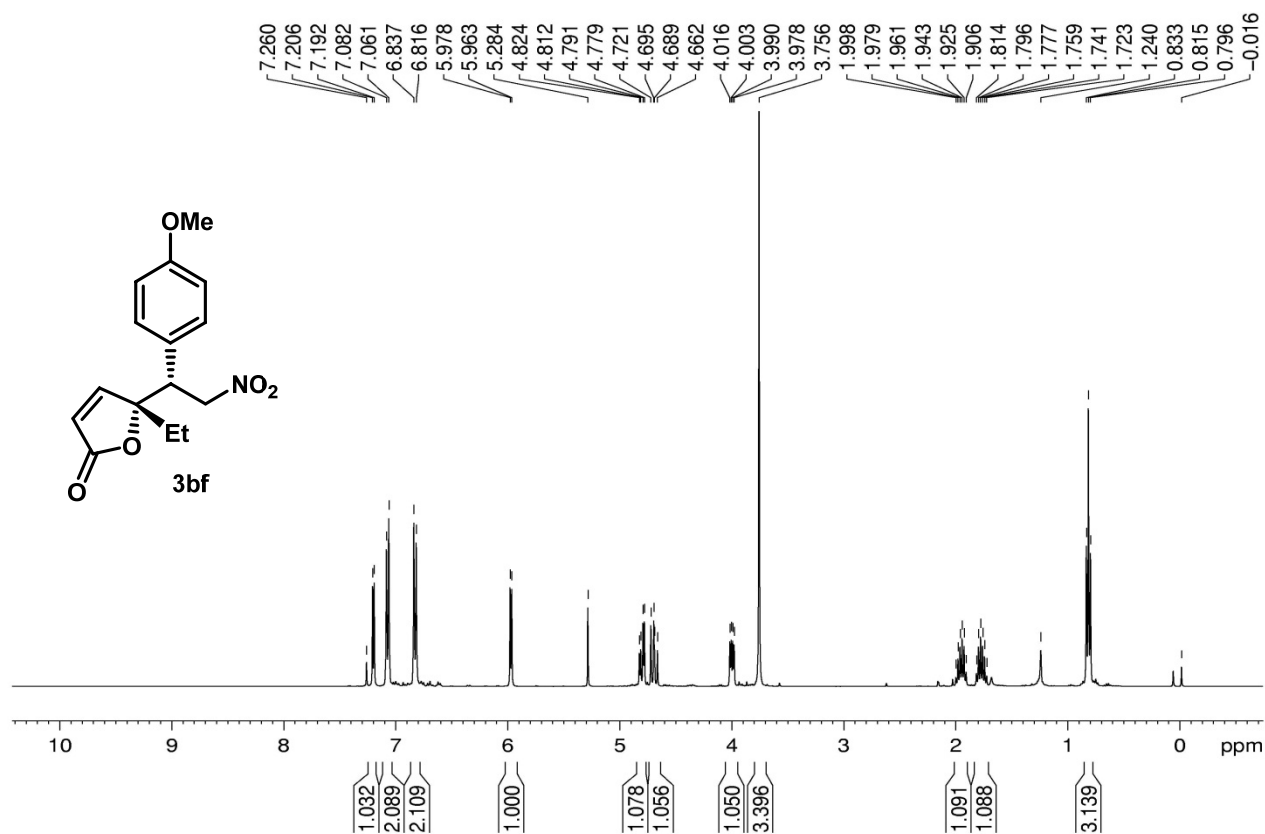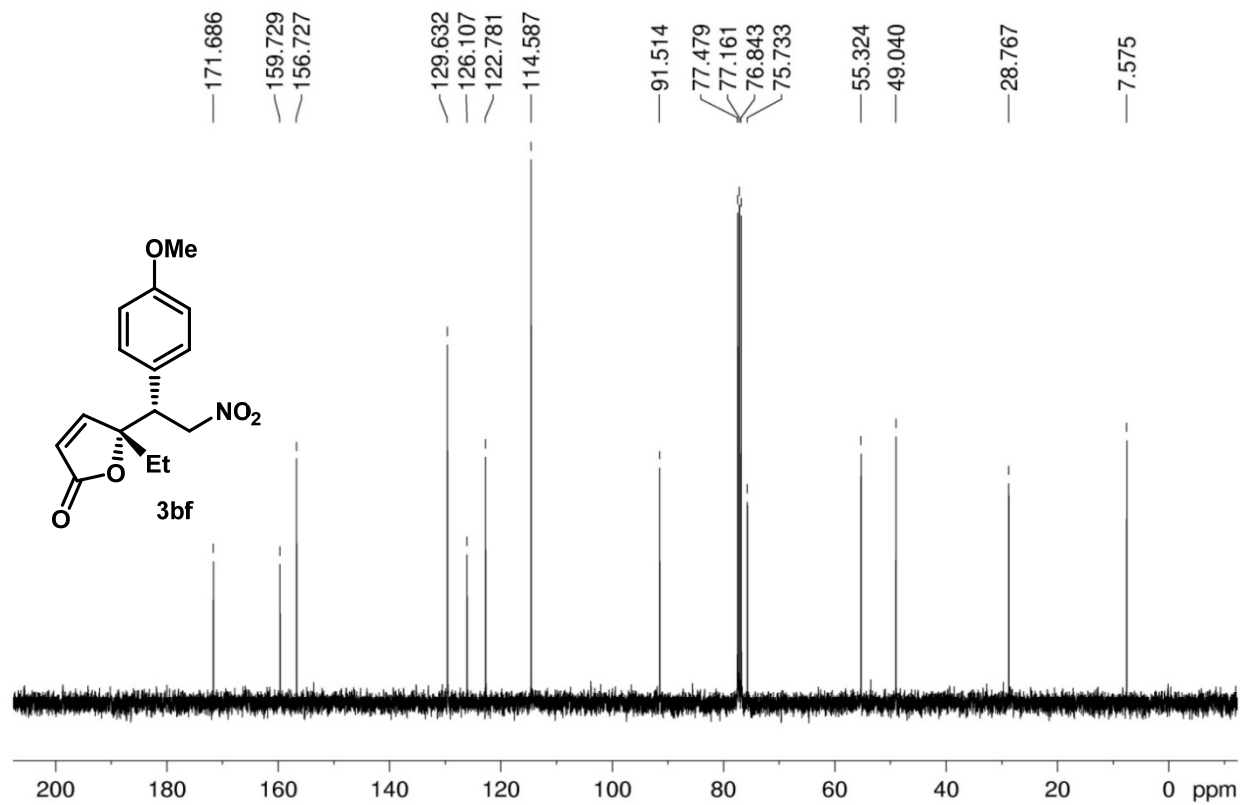

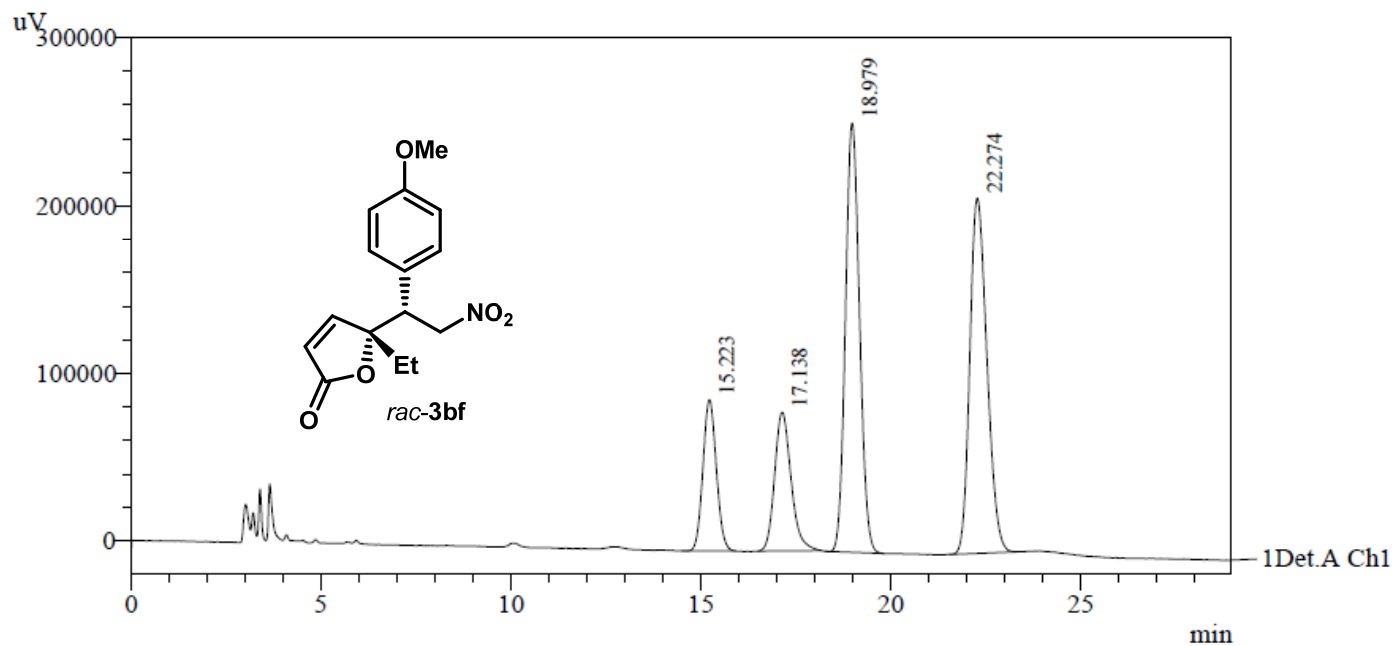

PeakTable

Detector A Ch1 210nm

| Peak# | Ret. Time | Area     | Area %  |
|-------|-----------|----------|---------|
| 1     | 15.223    | 2223525  | 12.359  |
| 2     | 17.138    | 2500017  | 13.896  |
| 3     | 18.979    | 6605960  | 36.718  |
| 4     | 22.274    | 6661442  | 37.027  |
| Total |           | 17990943 | 100.000 |

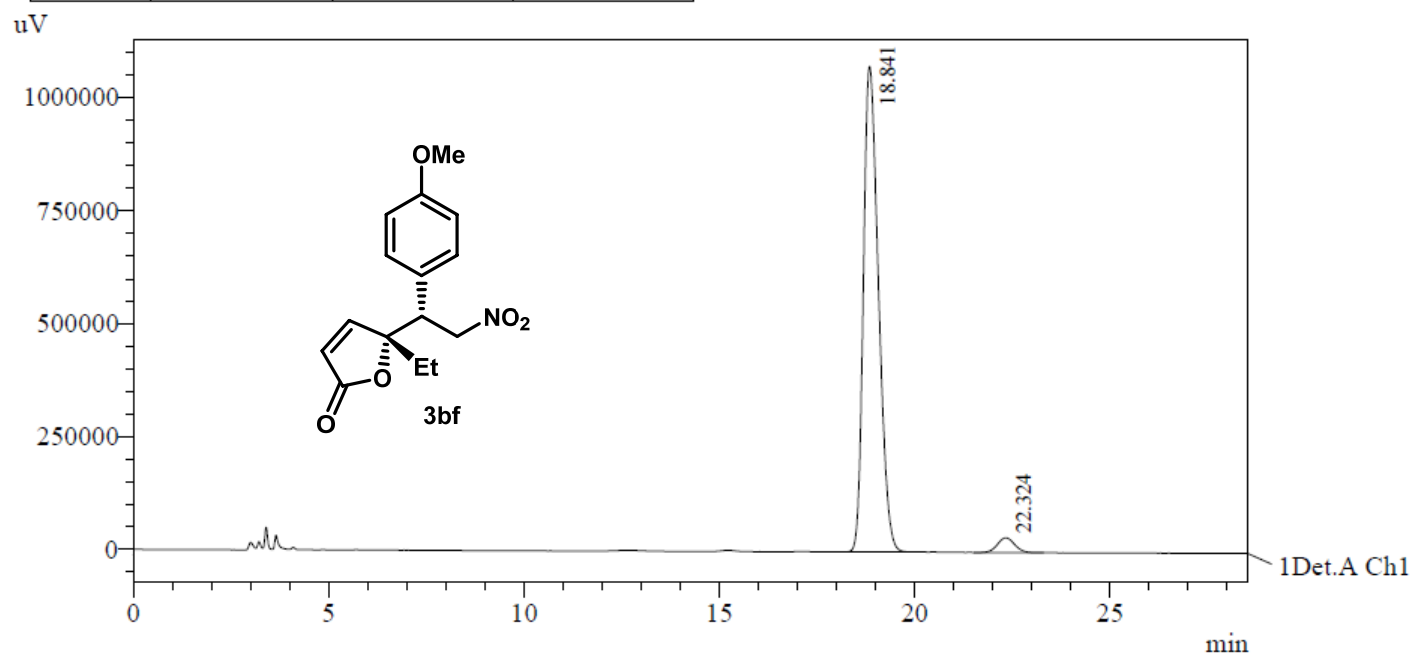

PeakTable

Detector A Ch1 210nm

| Peak# | Ret. Time | Area     | Area %  |
|-------|-----------|----------|---------|
| 1     | 18.841    | 28814217 | 96.692  |
| 2     | 22.324    | 985778   | 3.308   |
| Total |           | 29799994 | 100.000 |

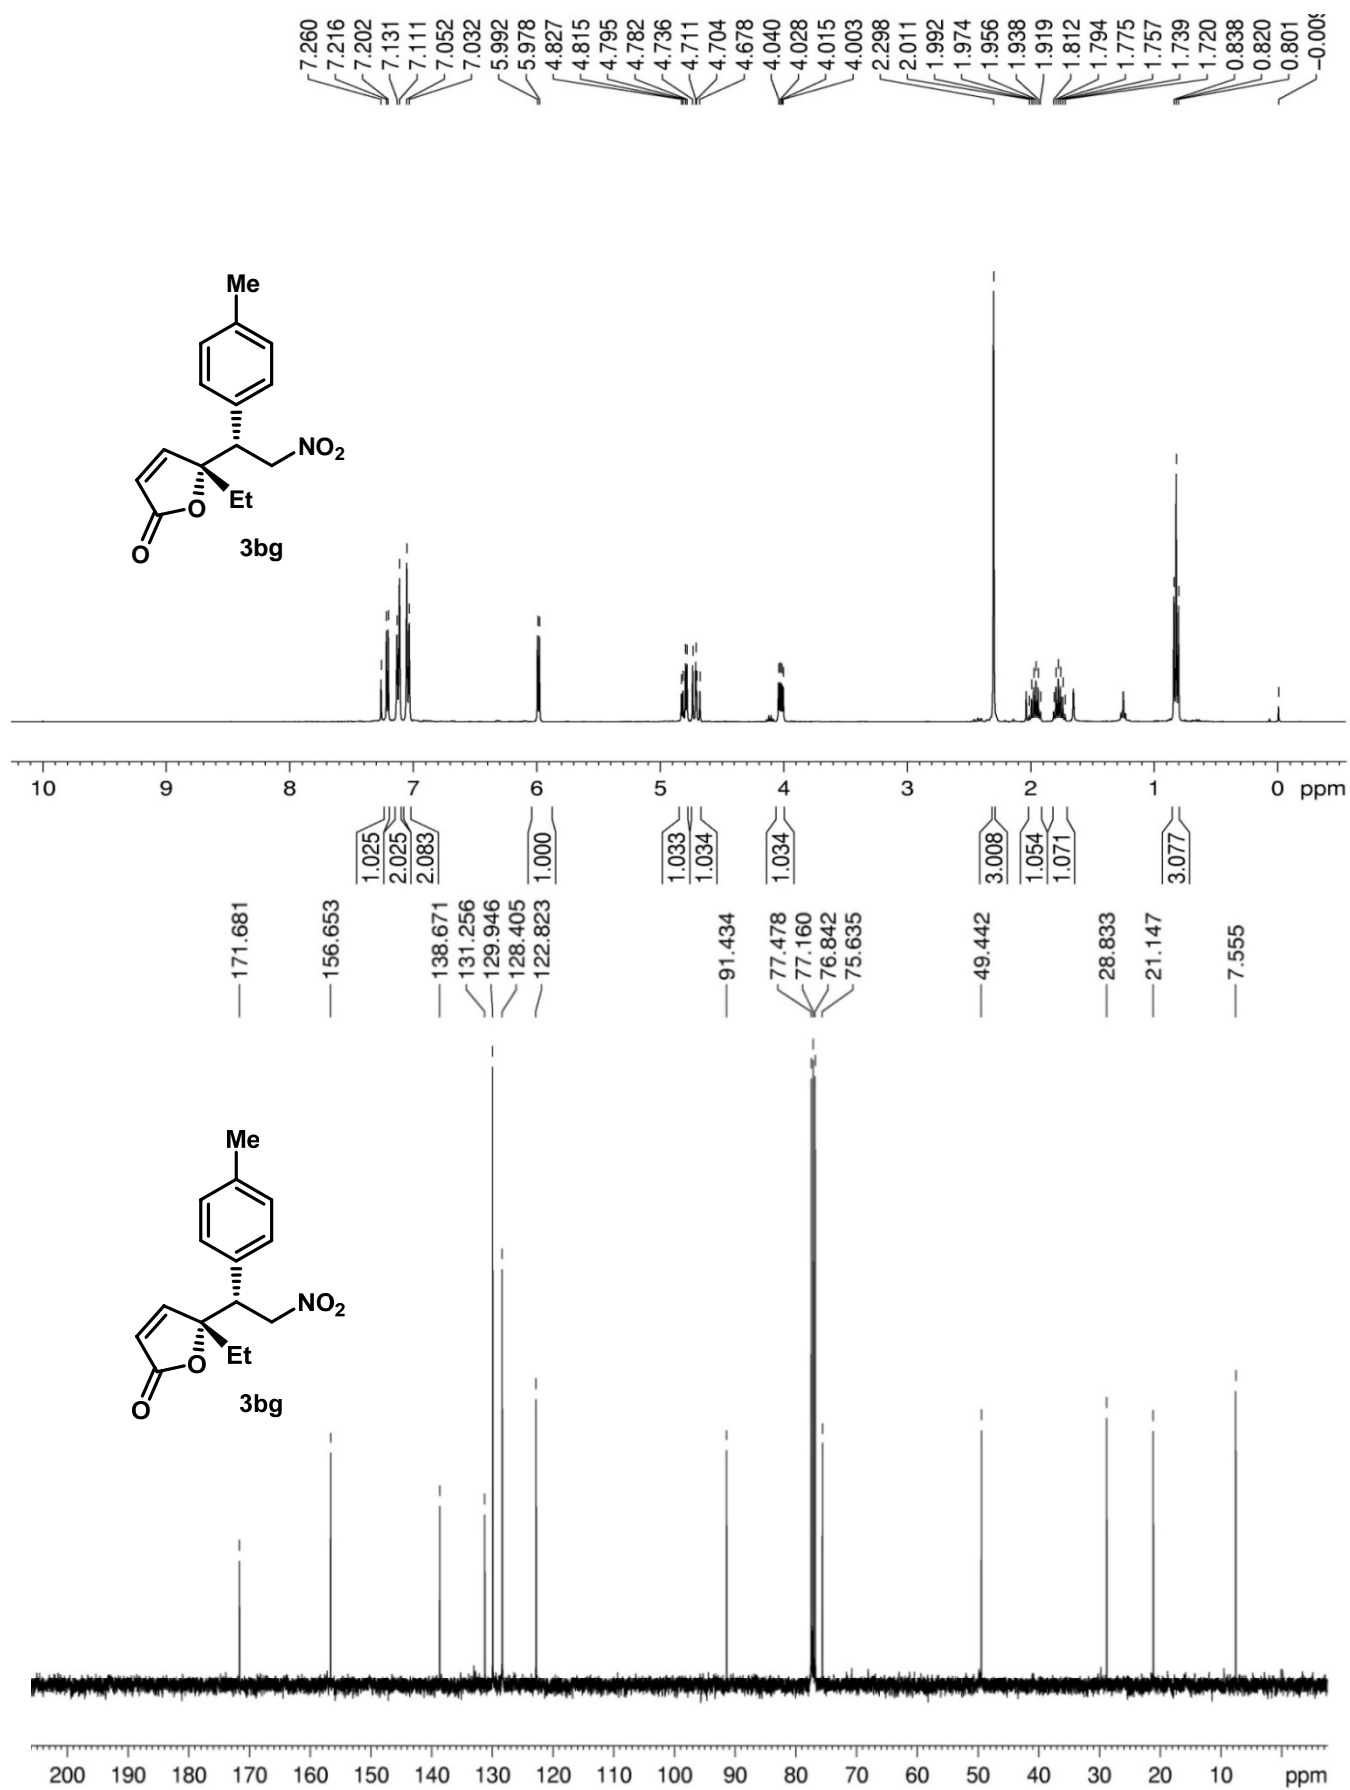

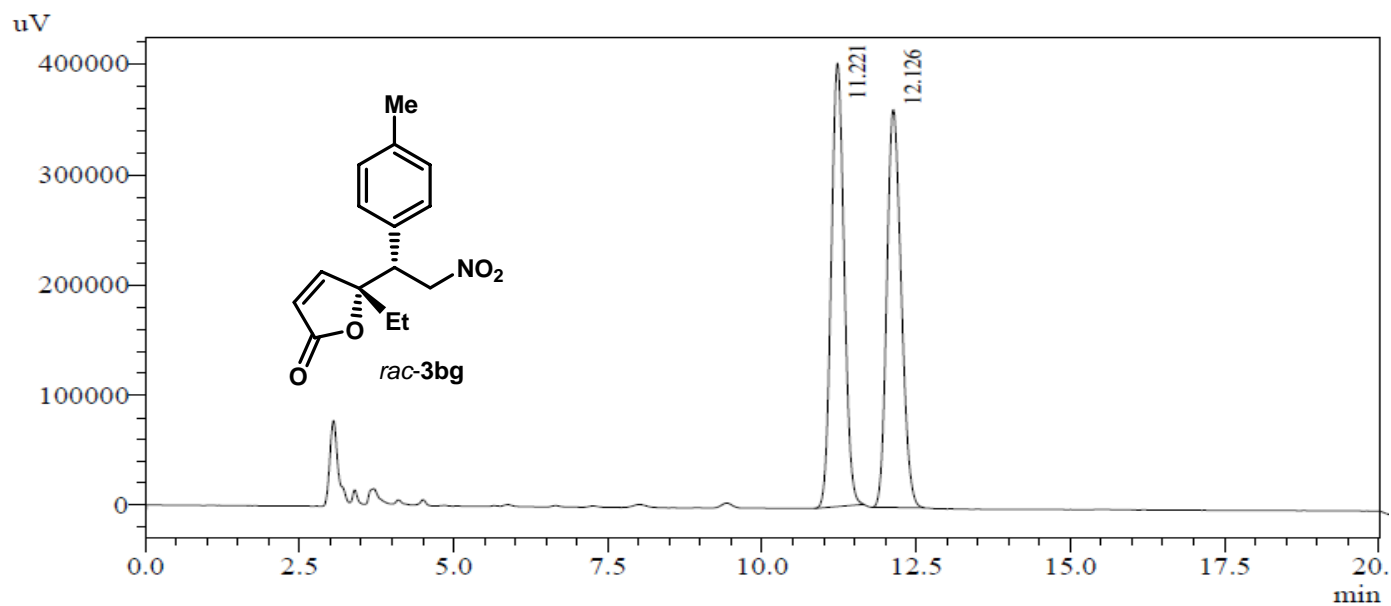

PeakTable

Detector A Ch1 210nm

| Peak# | Ret. Time | Area     | Area %  |
|-------|-----------|----------|---------|
| 1     | 11.221    | 5858816  | 49.948  |
| 2     | 12.126    | 5871083  | 50.052  |
| Total |           | 11729899 | 100.000 |

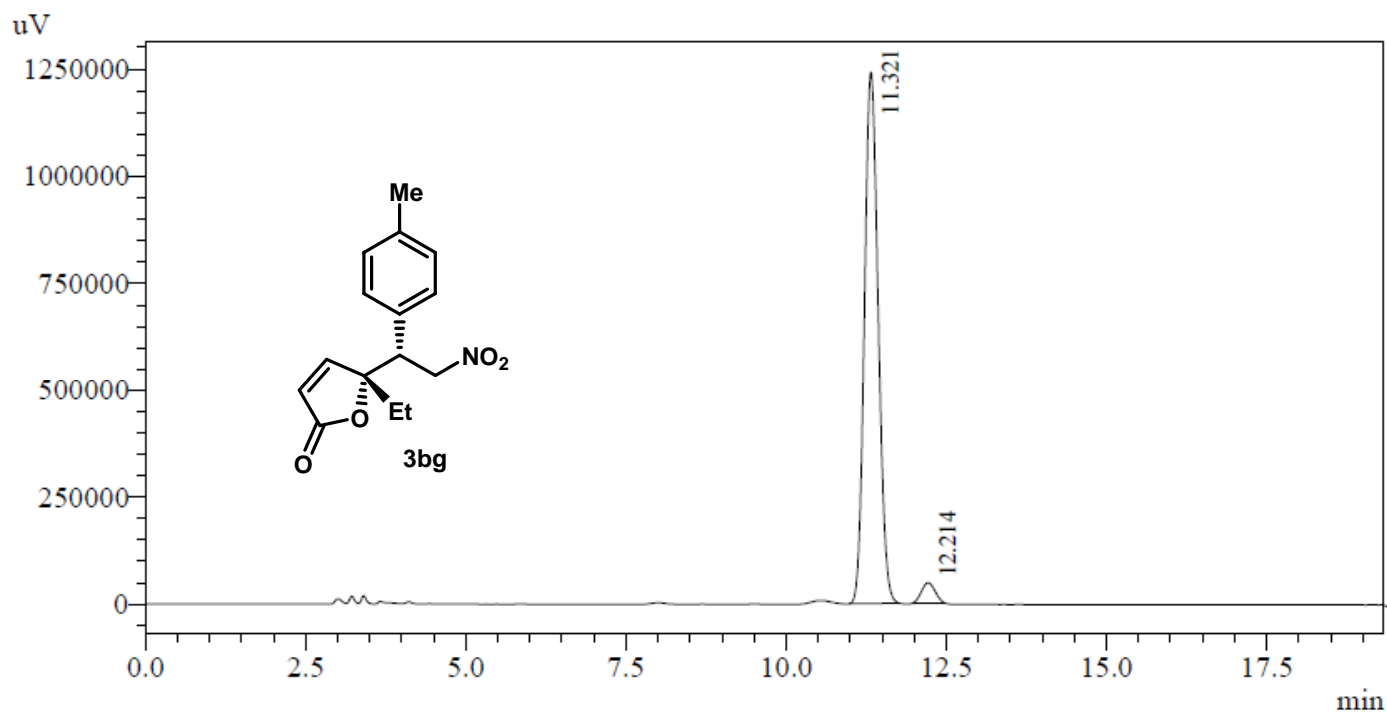

PeakTable

Detector A Ch1 210nm

| Peak# | Ret. Time | Area     | Area %  |
|-------|-----------|----------|---------|
| 1     | 11.321    | 18492120 | 96.309  |
| 2     | 12.214    | 708750   | 3.691   |
| Total |           | 19200870 | 100.000 |

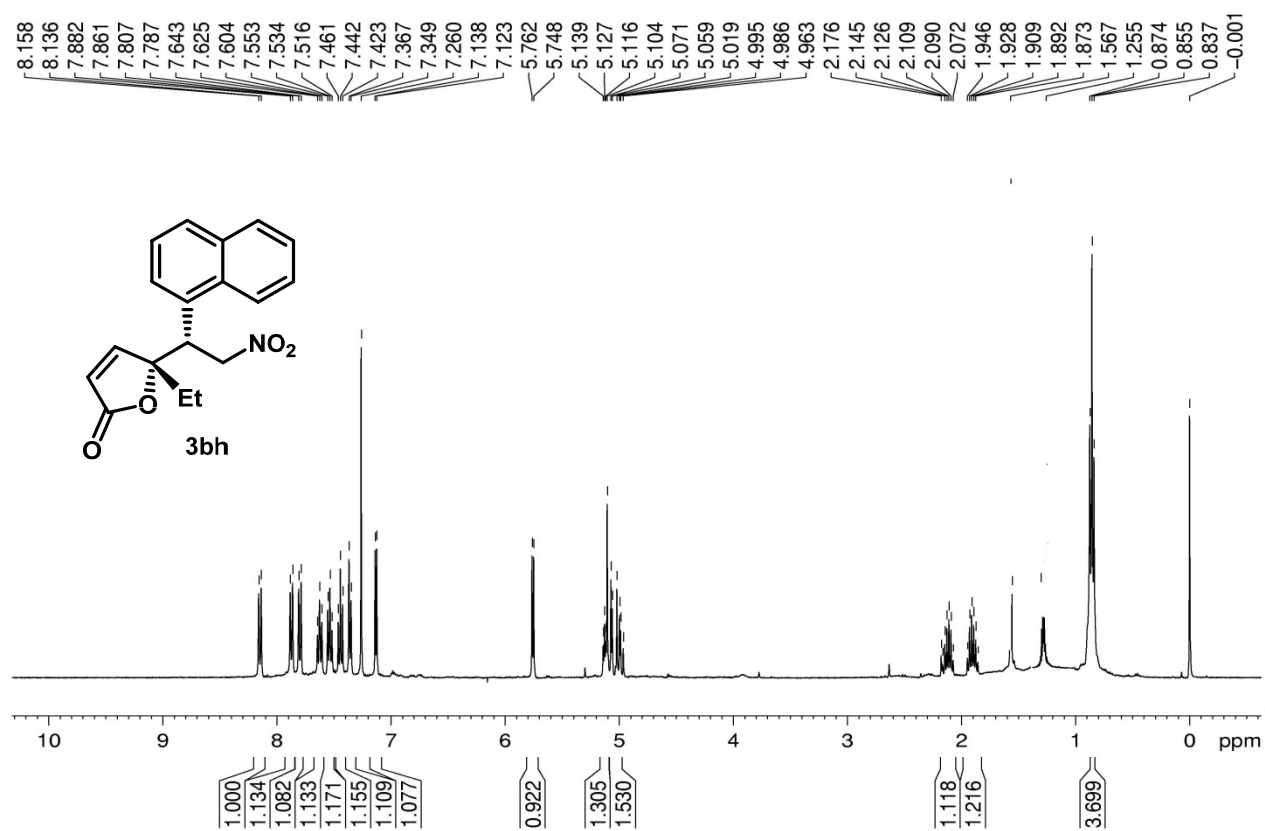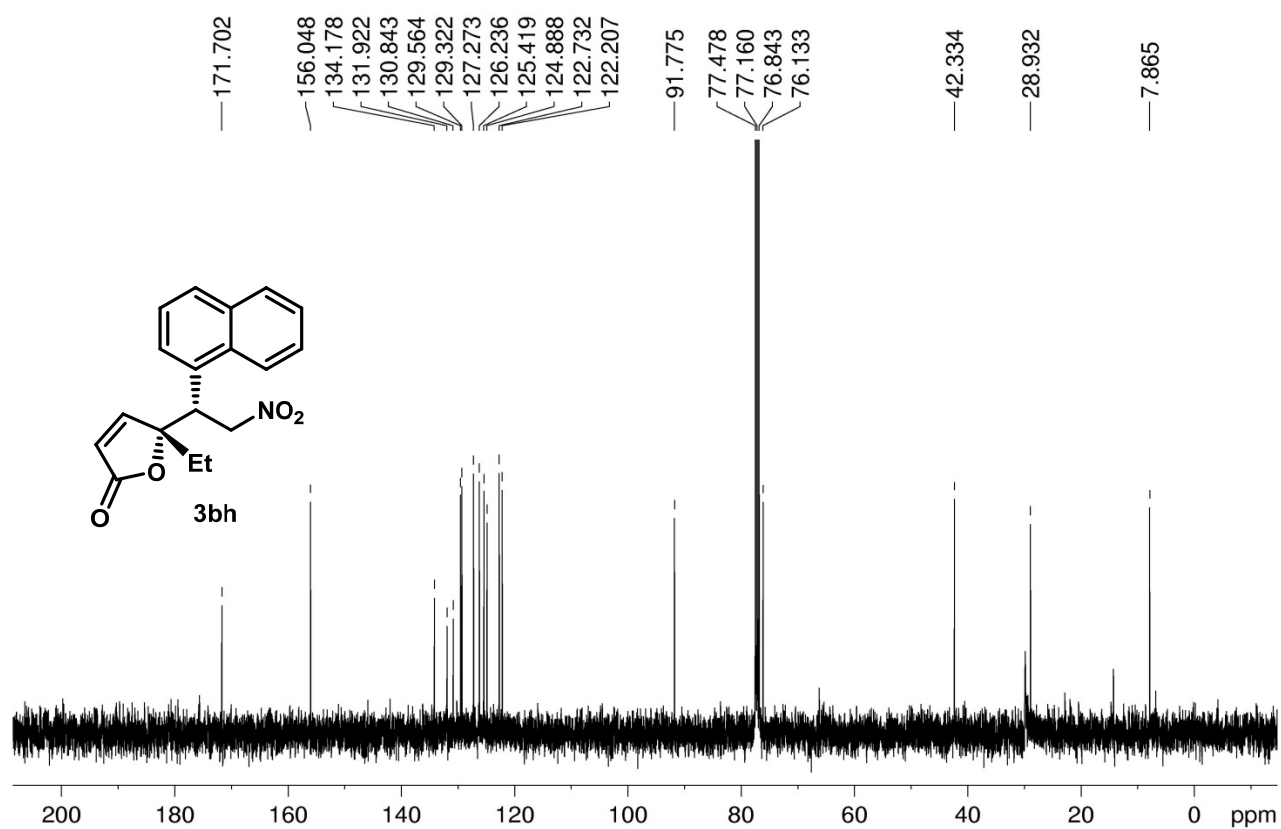

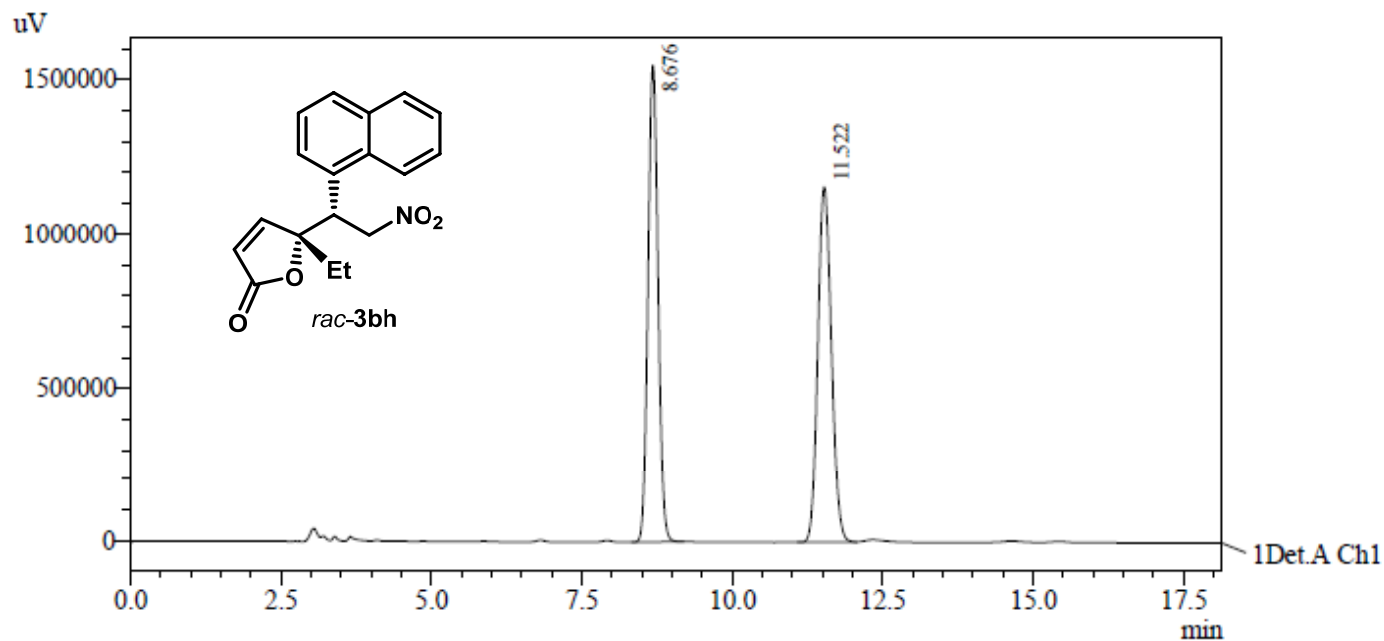

PeakTable

Detector A Ch1 210nm

| Peak# | Ret. Time | Area     | Area %  |
|-------|-----------|----------|---------|
| 1     | 8.676     | 18088111 | 49.841  |
| 2     | 11.522    | 18203188 | 50.159  |
| Total |           | 36291300 | 100.000 |

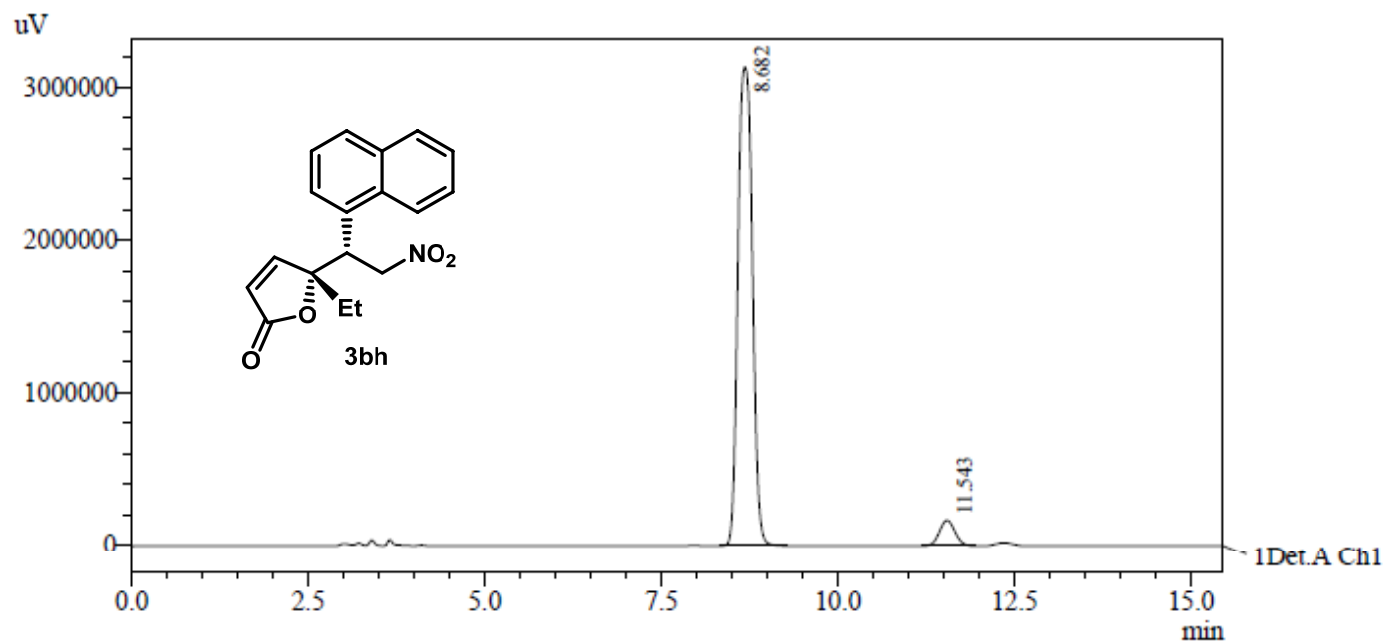

PeakTable

Detector A Ch1 210nm

| Peak# | Ret. Time | Area     | Area %  |
|-------|-----------|----------|---------|
| 1     | 8.682     | 44554458 | 94.550  |
| 2     | 11.543    | 2568332  | 5.450   |
| Total |           | 47122790 | 100.000 |

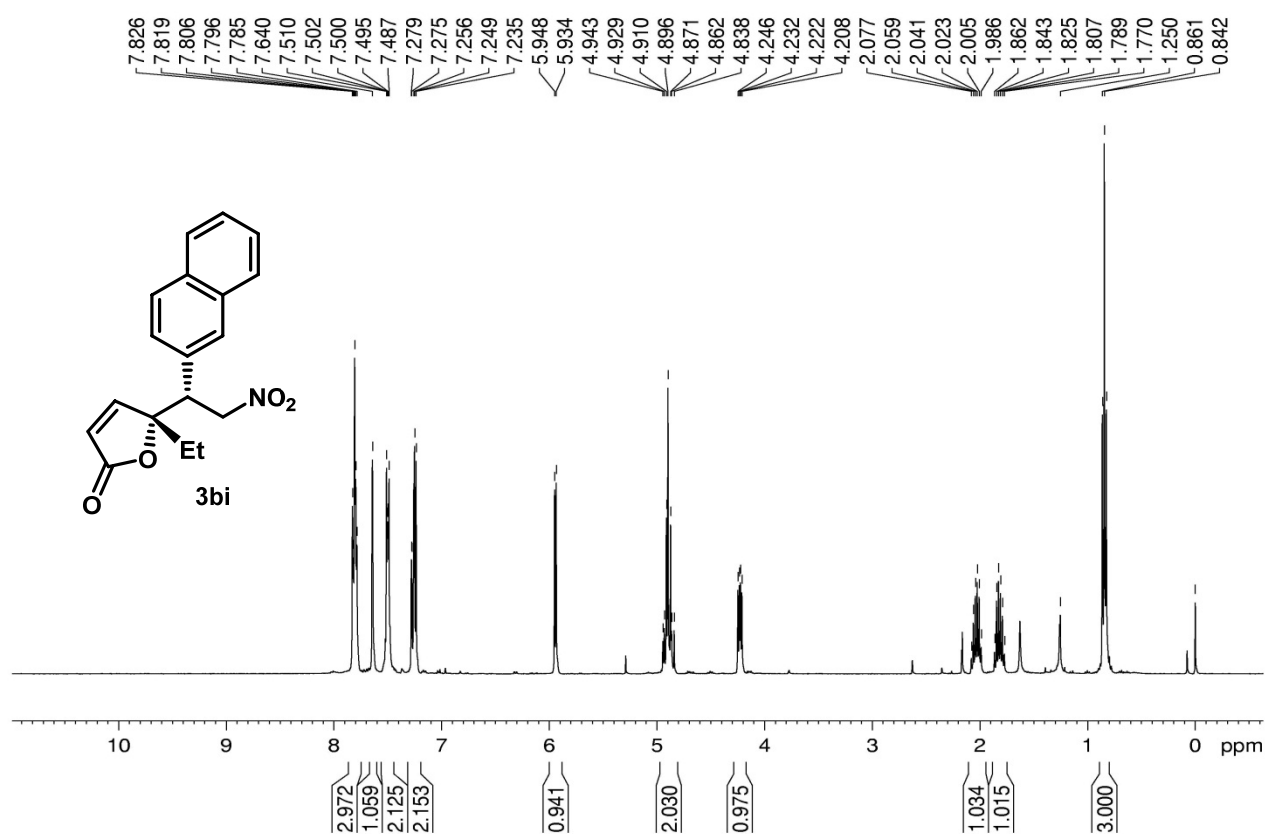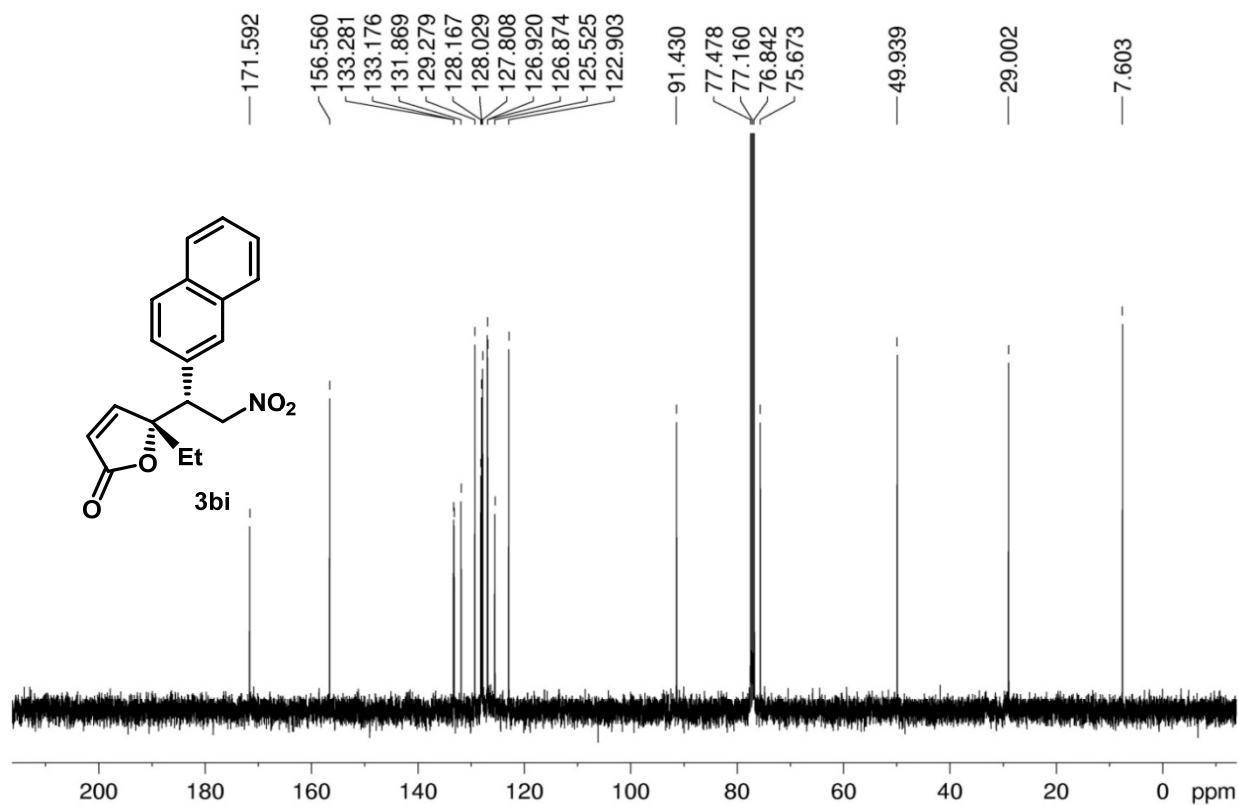

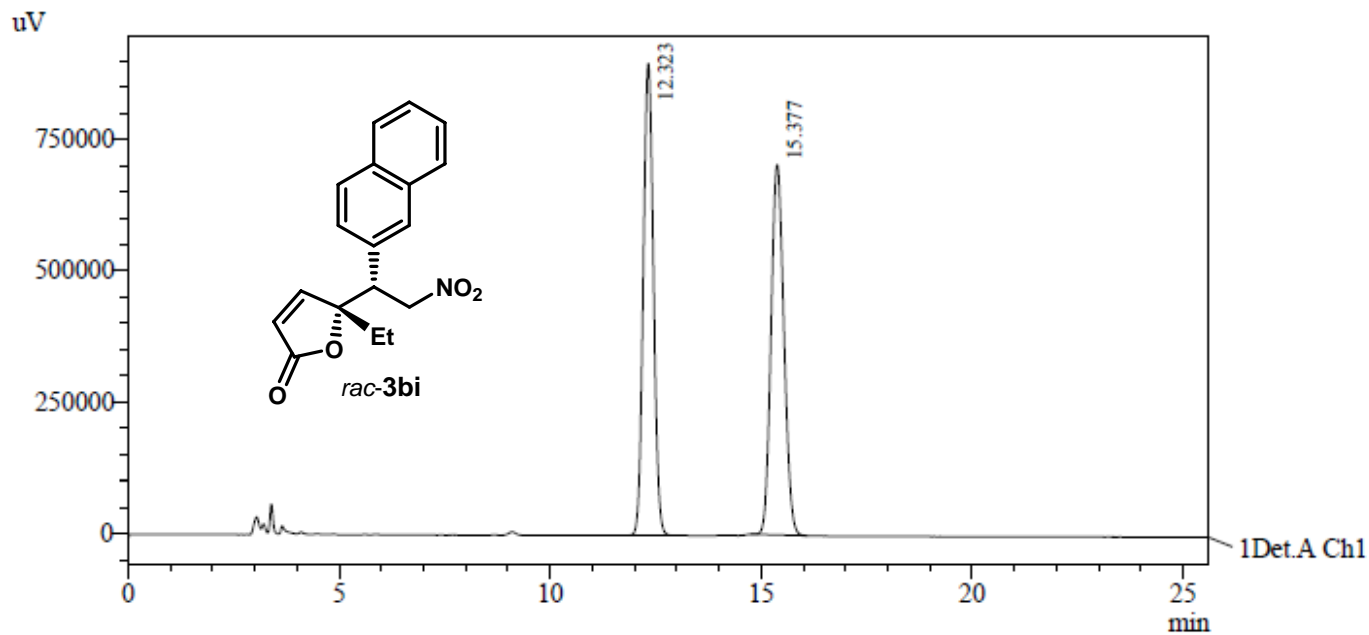

PeakTable

Detector A Ch1 210nm

| Peak# | Ret. Time | Area     | Area %  |
|-------|-----------|----------|---------|
| 1     | 12.323    | 14961419 | 50.083  |
| 2     | 15.377    | 14911663 | 49.917  |
| Total |           | 29873082 | 100.000 |

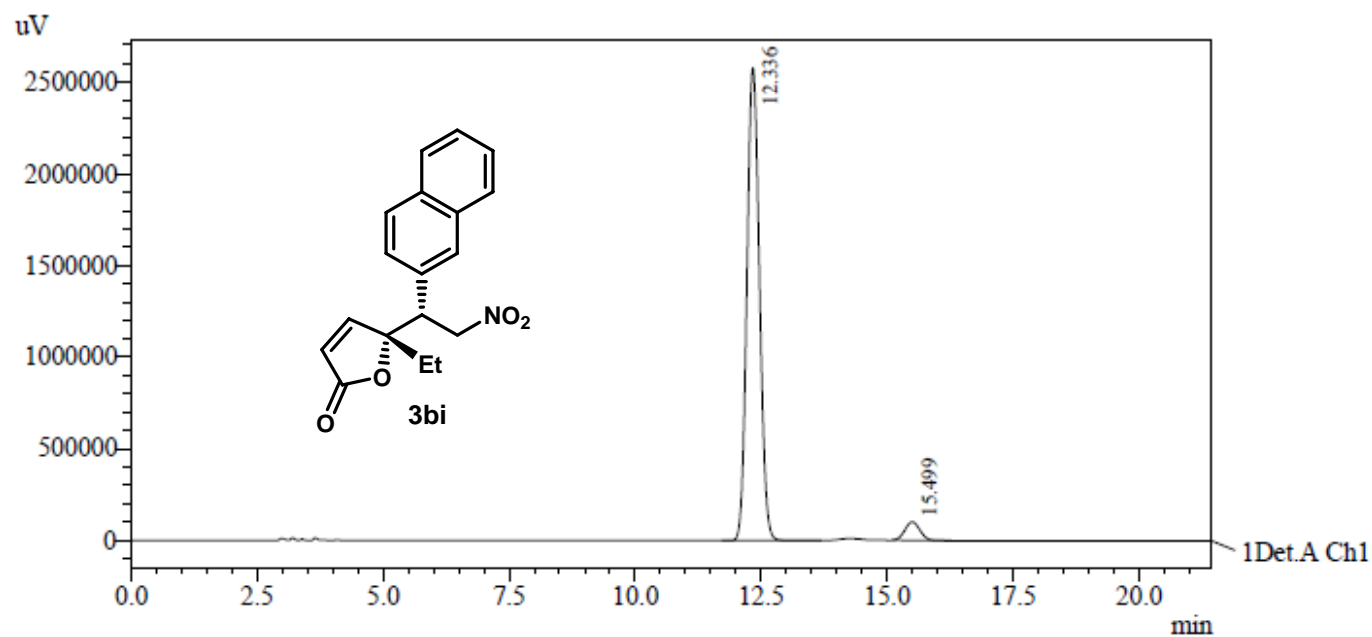

PeakTable

Detector A Ch1 210nm

| Peak# | Ret. Time | Area     | Area %  |
|-------|-----------|----------|---------|
| 1     | 12.336    | 44453895 | 95.569  |
| 2     | 15.499    | 2061160  | 4.431   |
| Total |           | 46515056 | 100.000 |

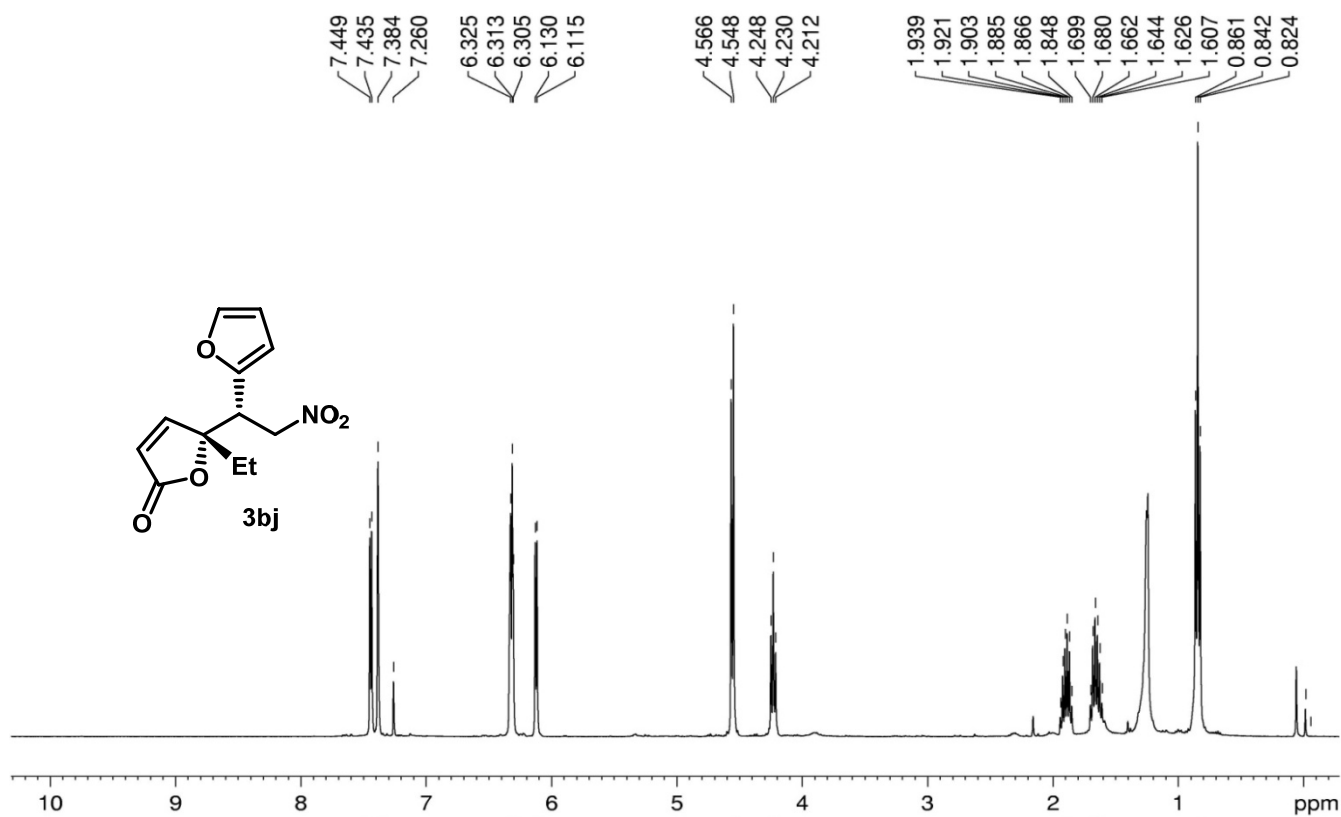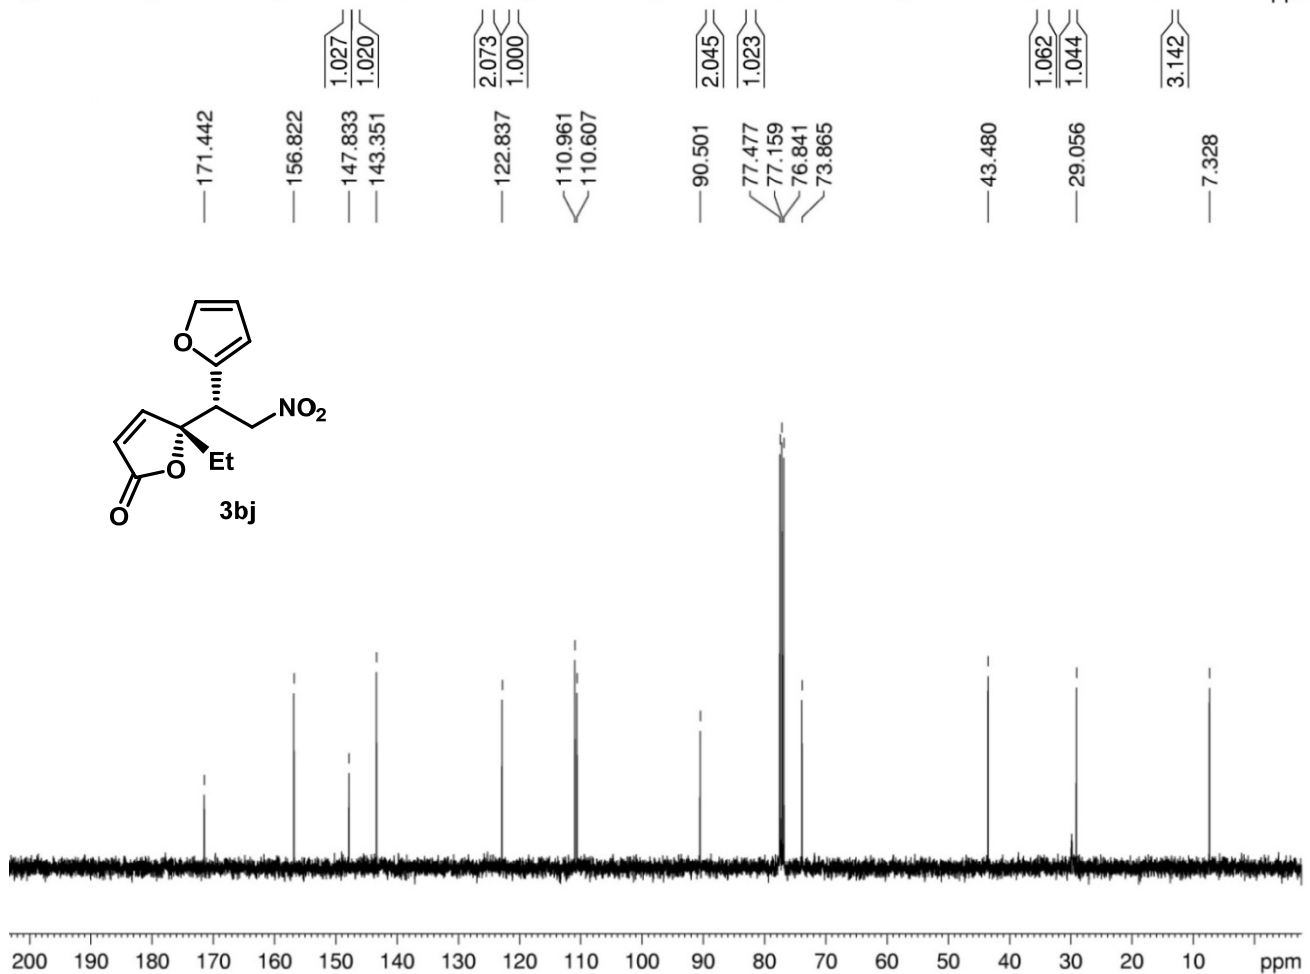

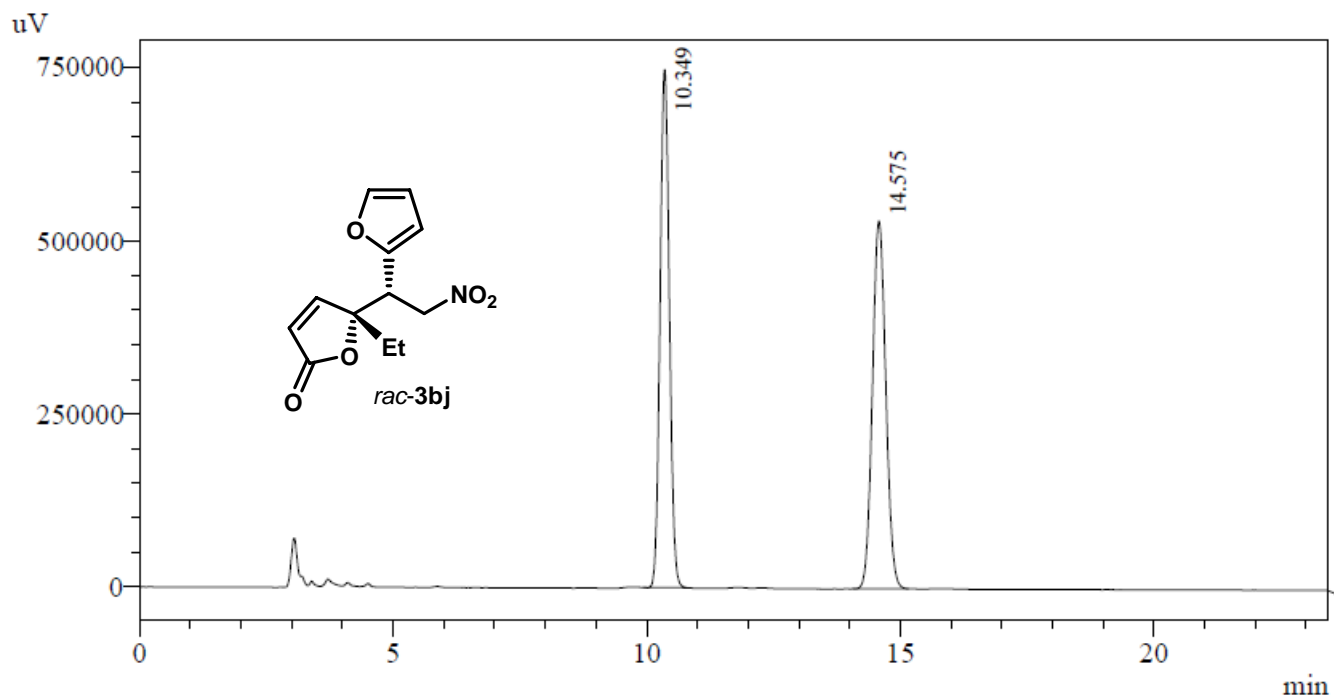

PeakTable

Detector A Ch1 210nm

| Peak# | Ret. Time | Area     | Area %  |
|-------|-----------|----------|---------|
| 1     | 10.349    | 9573668  | 49.546  |
| 2     | 14.575    | 9749175  | 50.454  |
| Total |           | 19322842 | 100.000 |

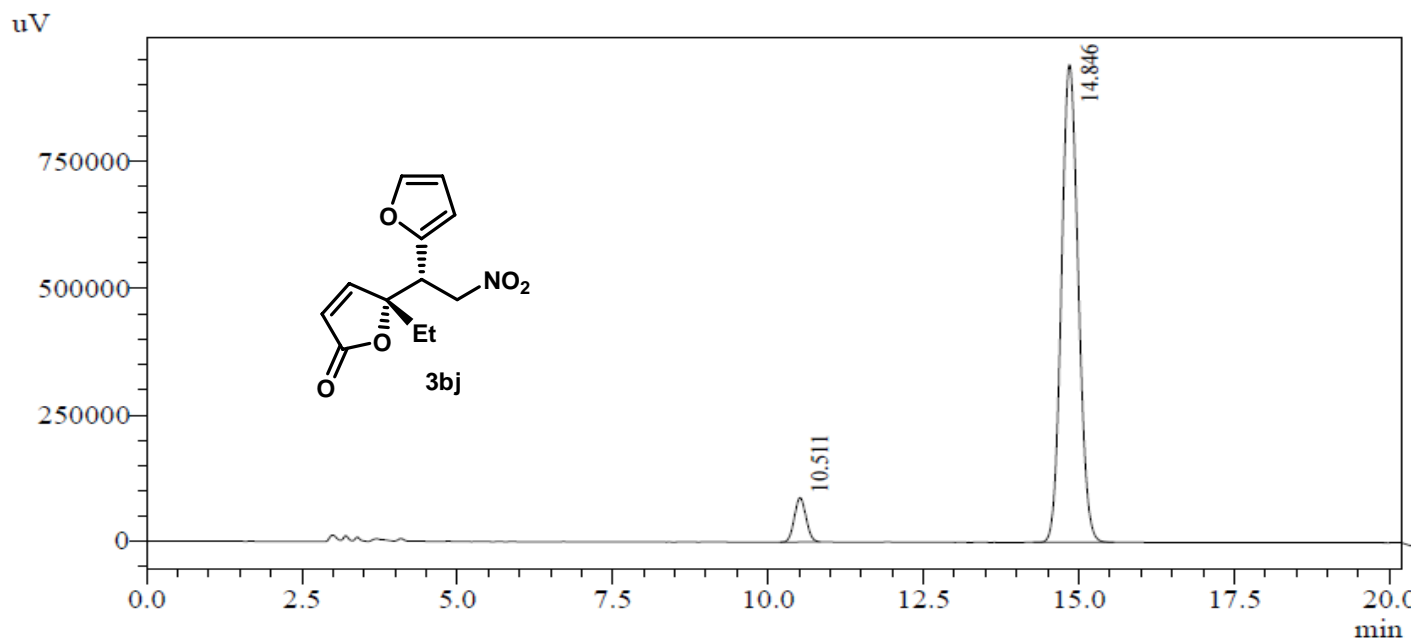

PeakTable

Detector A Ch1 210nm

| Peak# | Ret. Time | Area     | Area %  |
|-------|-----------|----------|---------|
| 1     | 10.511    | 1156579  | 6.091   |
| 2     | 14.846    | 17831957 | 93.909  |
| Total |           | 18988536 | 100.000 |

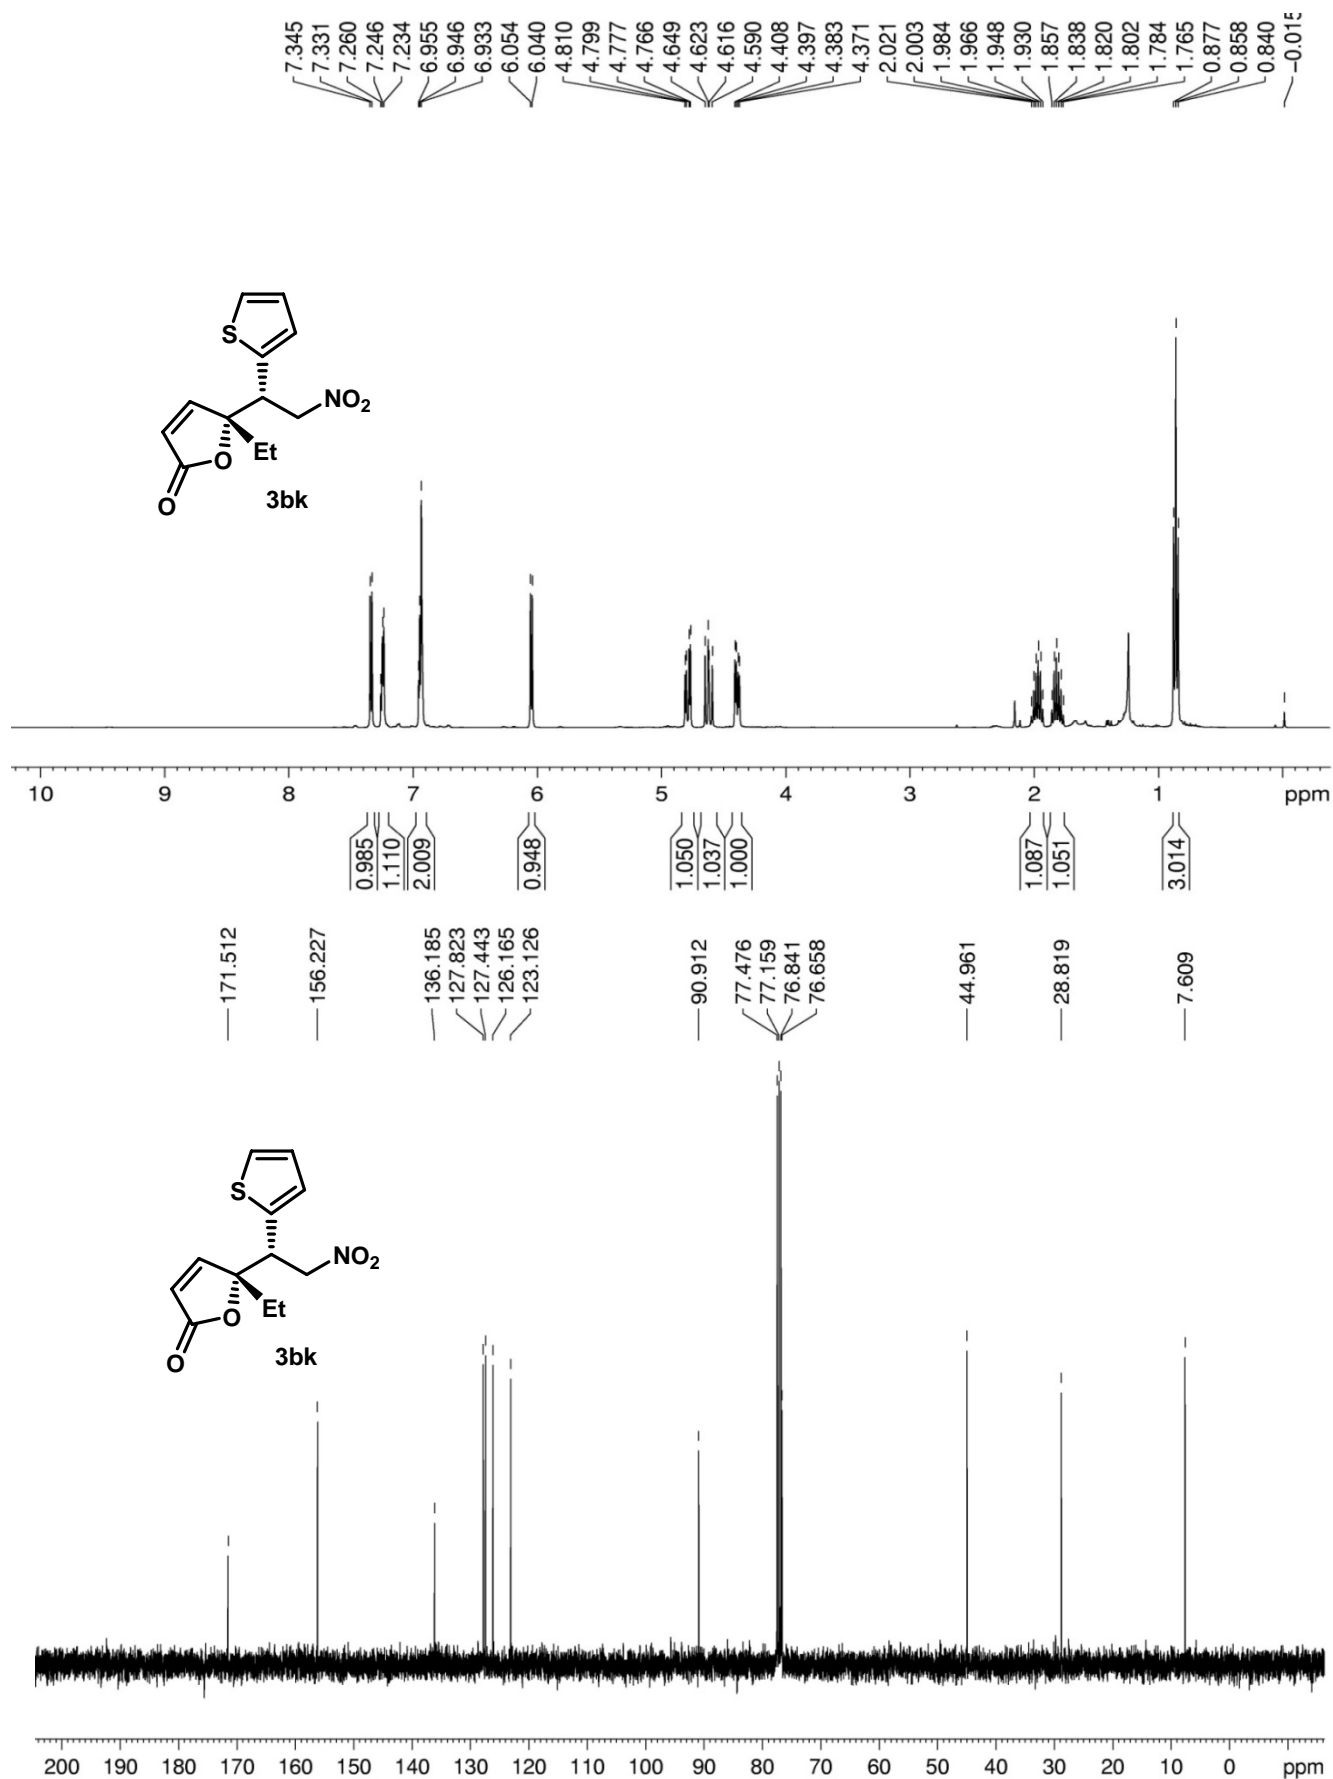

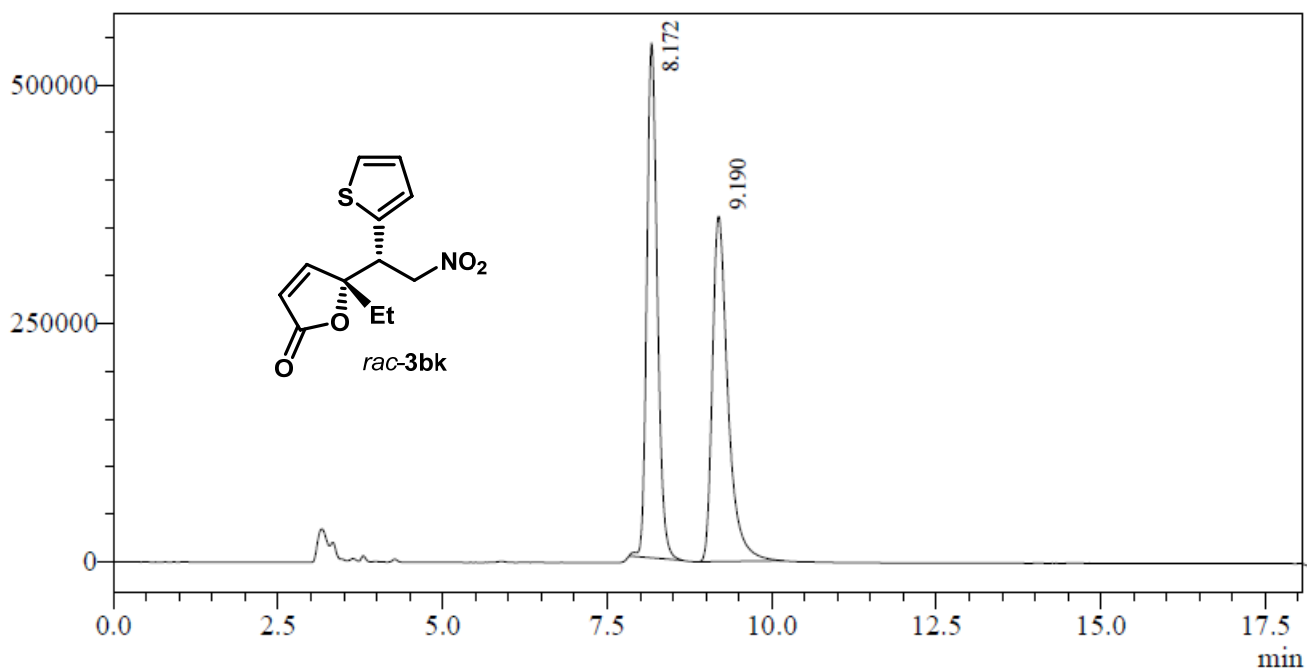

PeakTable

Detector A Ch1 210nm

| Peak# | Ret. Time | Area     | Area %  |
|-------|-----------|----------|---------|
| 1     | 8.172     | 5988697  | 50.148  |
| 2     | 9.190     | 5953437  | 49.852  |
| Total |           | 11942134 | 100.000 |

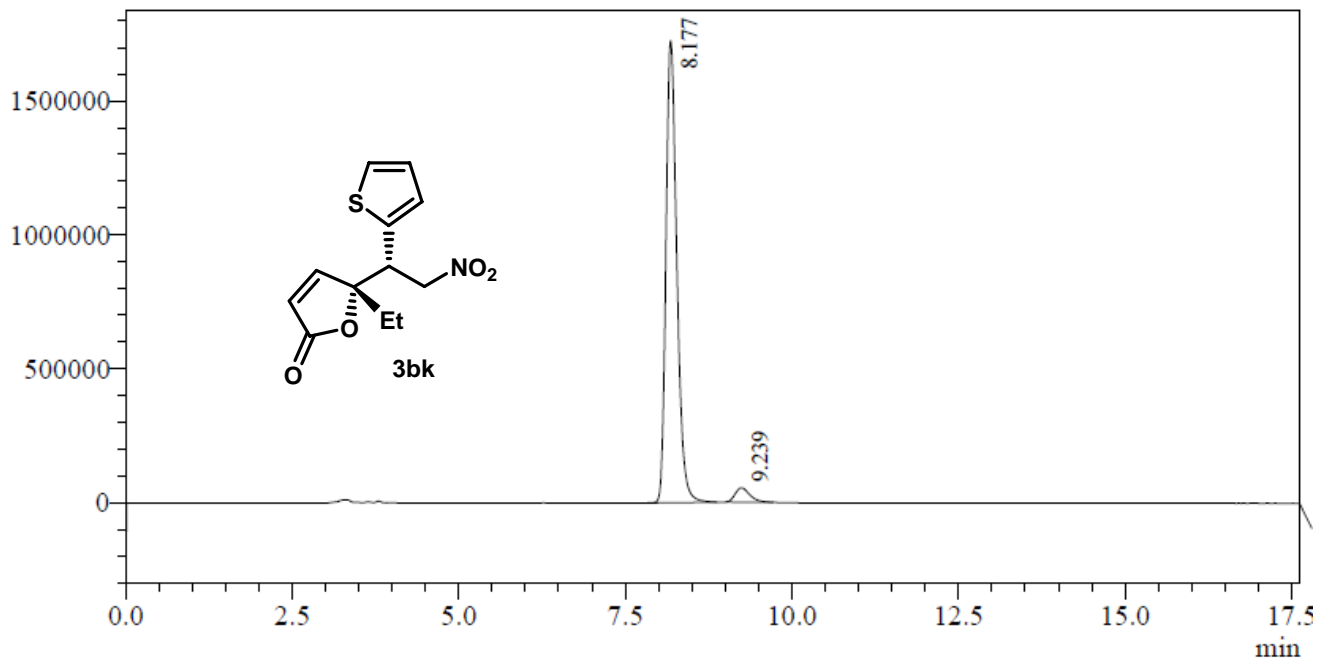

PeakTable

Detector A Ch1 210nm

| Peak# | Ret. Time | Area     | Area %  |
|-------|-----------|----------|---------|
| 1     | 8.177     | 19565396 | 95.993  |
| 2     | 9.239     | 816768   | 4.007   |
| Total |           | 20382164 | 100.000 |

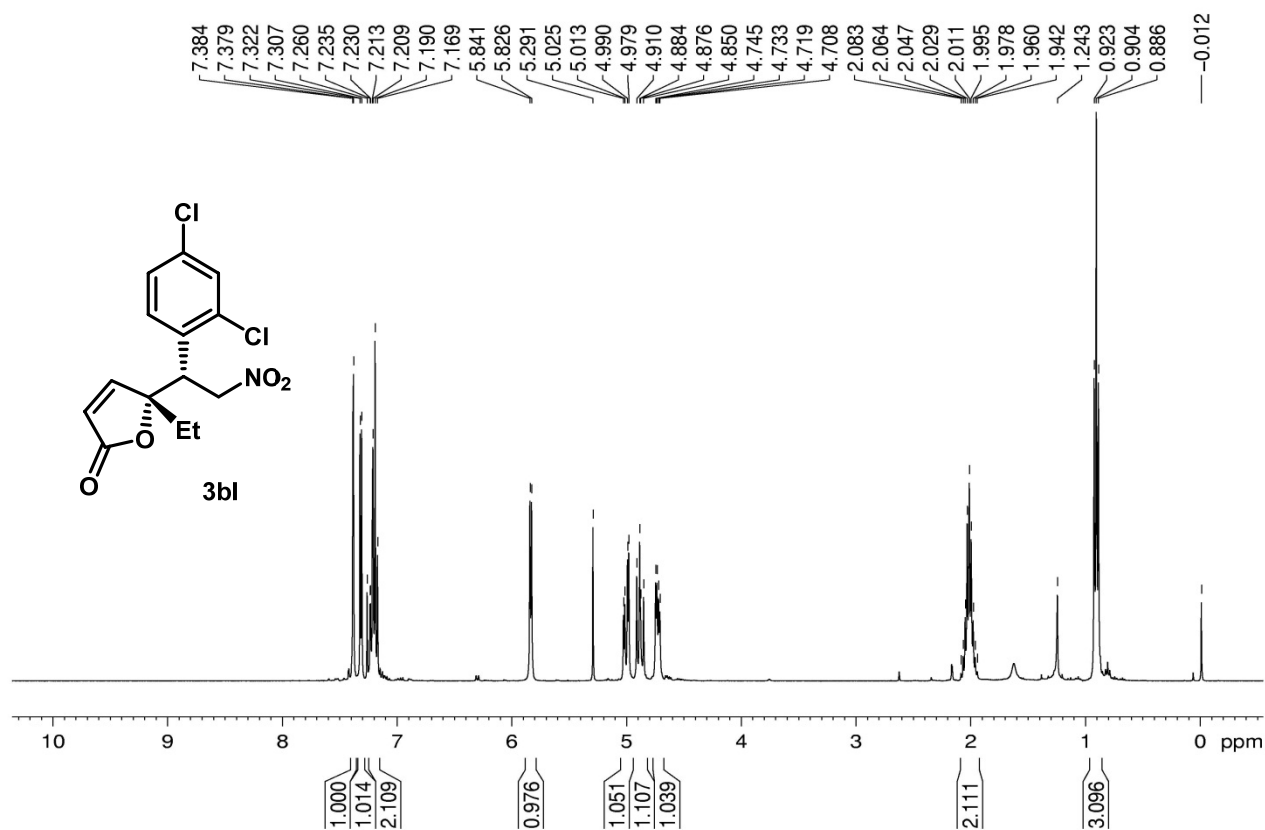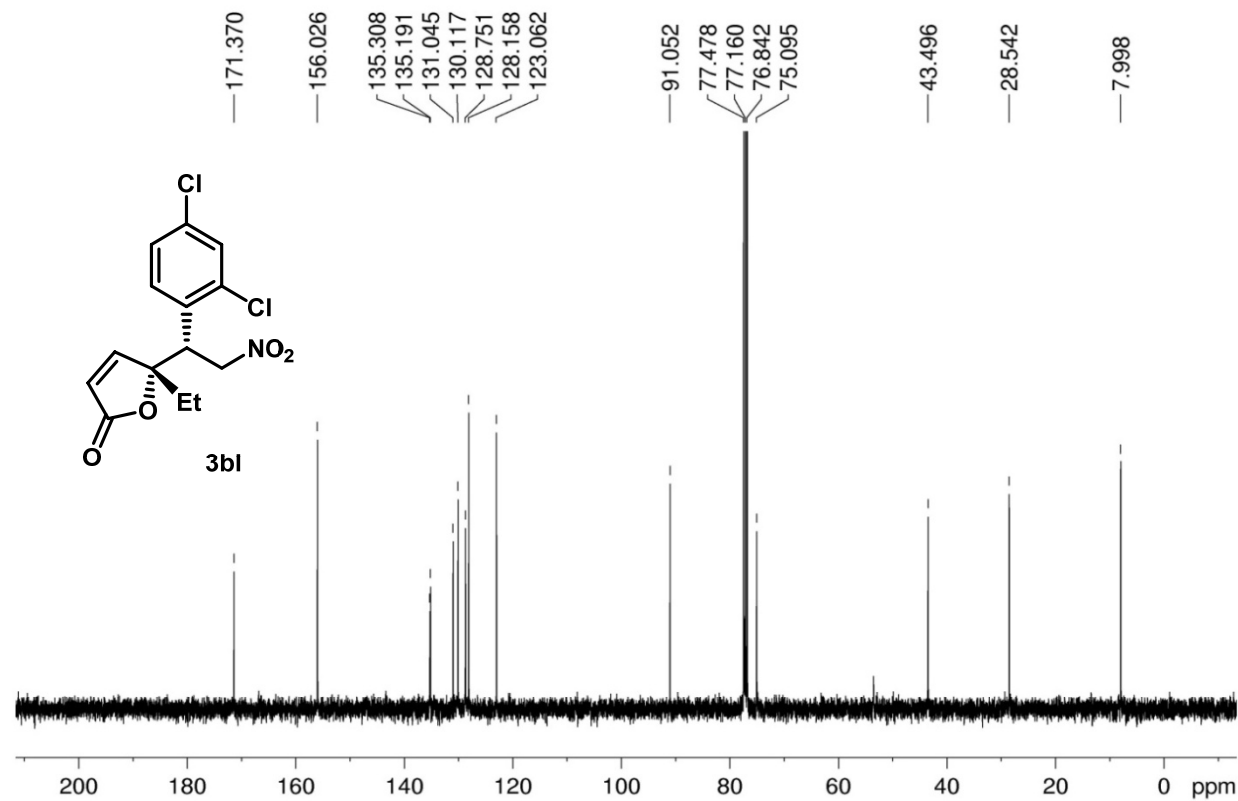

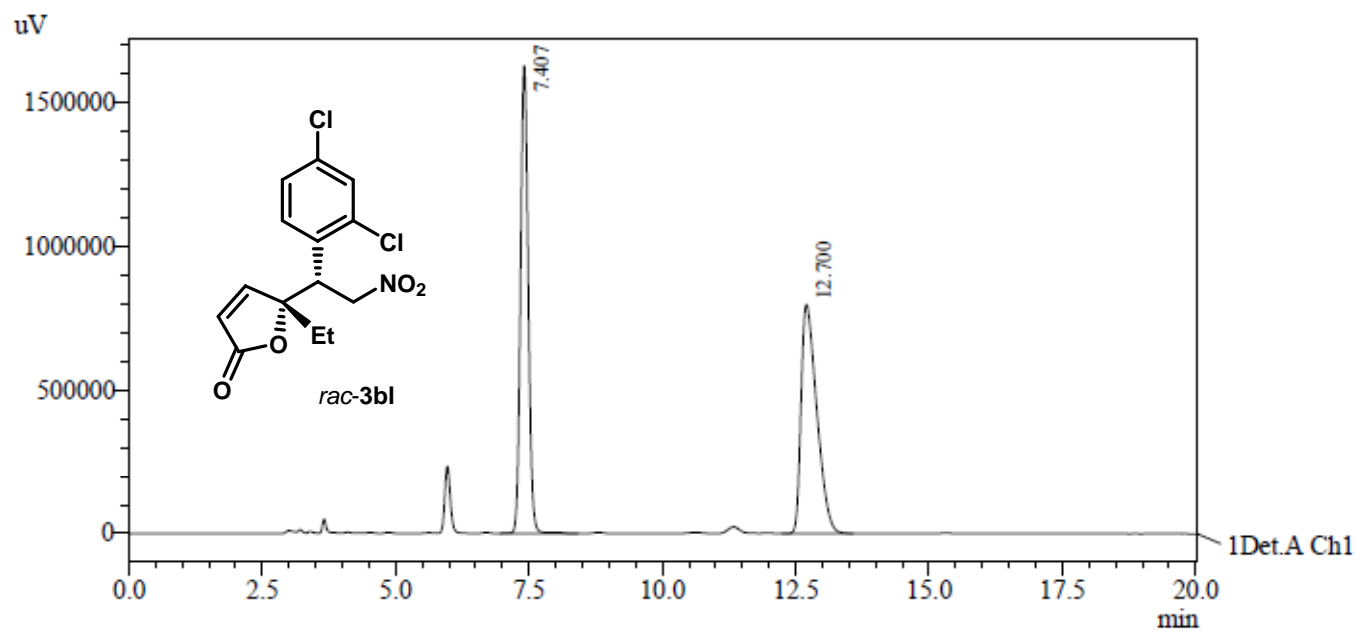

PeakTable

Detector A Ch1 210nm

| Peak# | Ret. Time | Area     | Area %  |
|-------|-----------|----------|---------|
| 1     | 7.407     | 16310897 | 49.953  |
| 2     | 12.700    | 16341518 | 50.047  |
| Total |           | 32652415 | 100.000 |

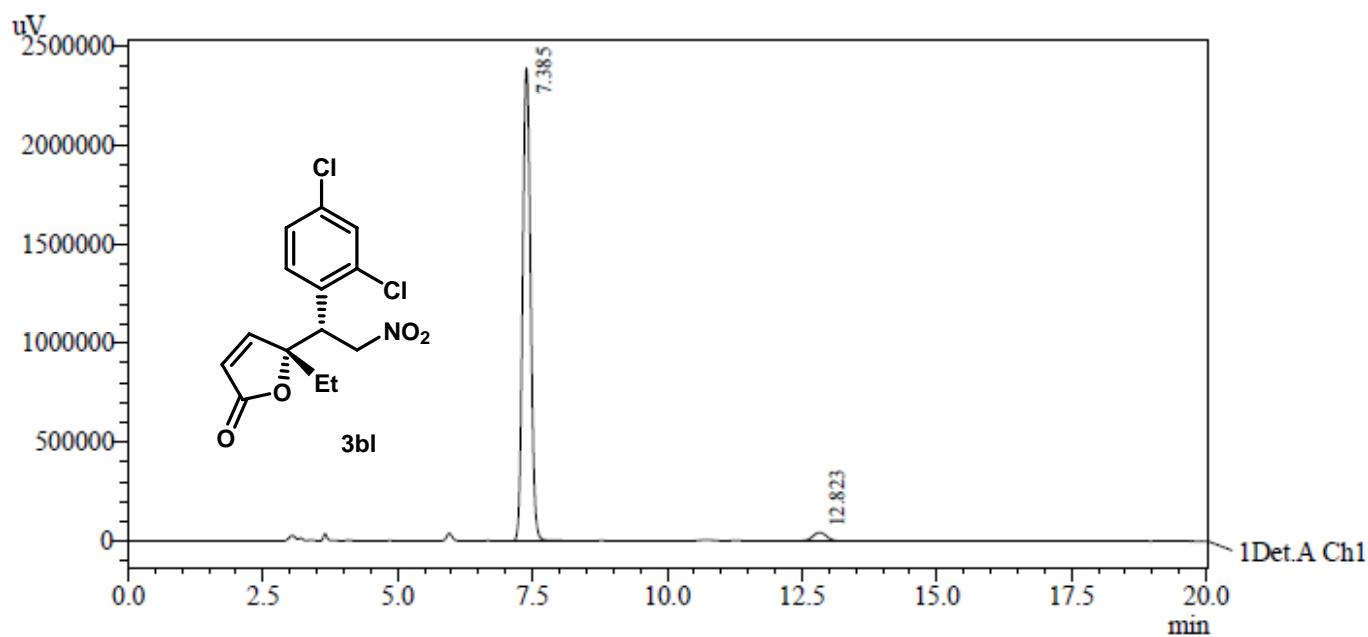

PeakTable

Detector A Ch1 210nm

| Peak# | Ret. Time | Area     | Area %  |
|-------|-----------|----------|---------|
| 1     | 7.385     | 24397407 | 96.810  |
| 2     | 12.823    | 804035   | 3.190   |
| Total |           | 25201443 | 100.000 |

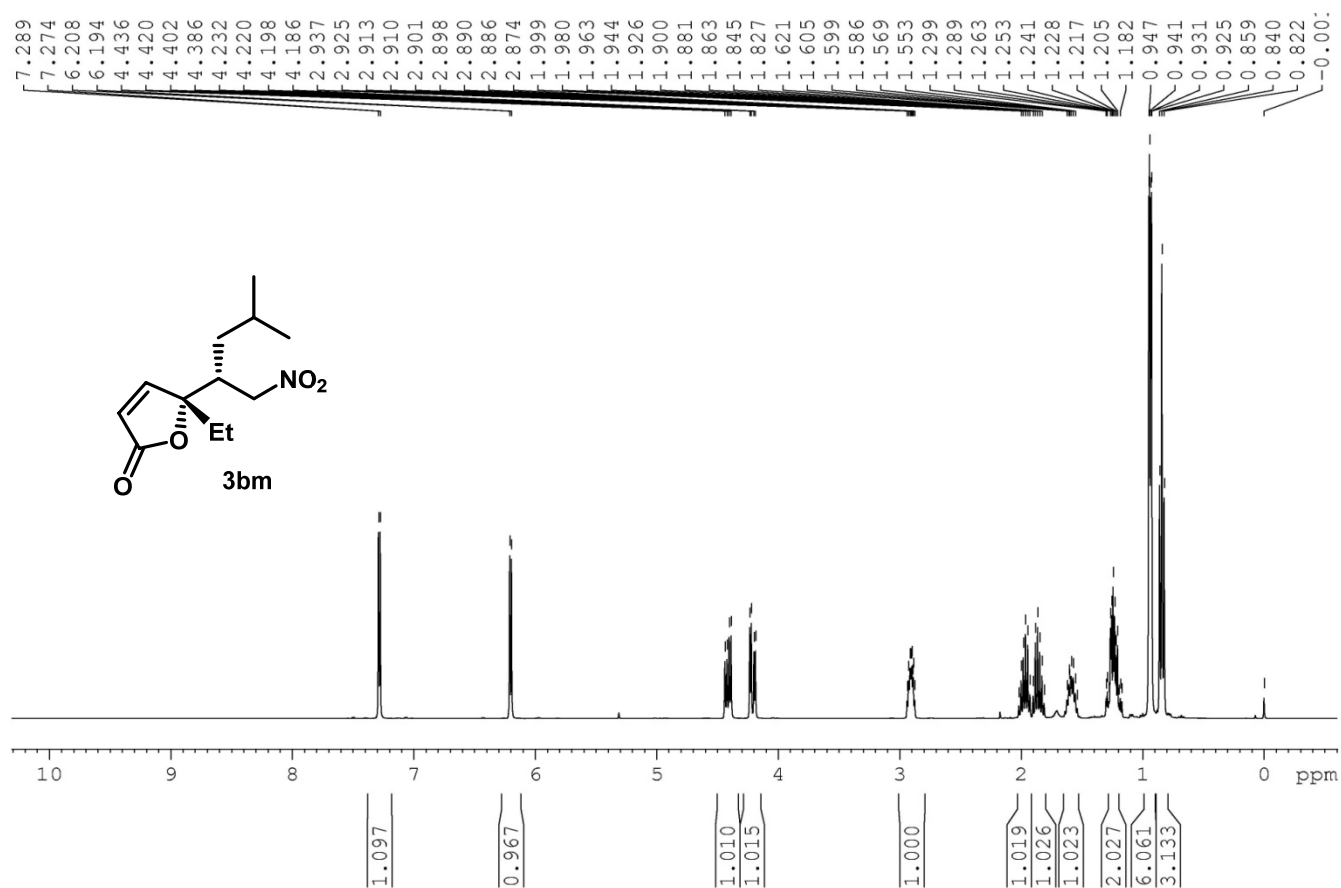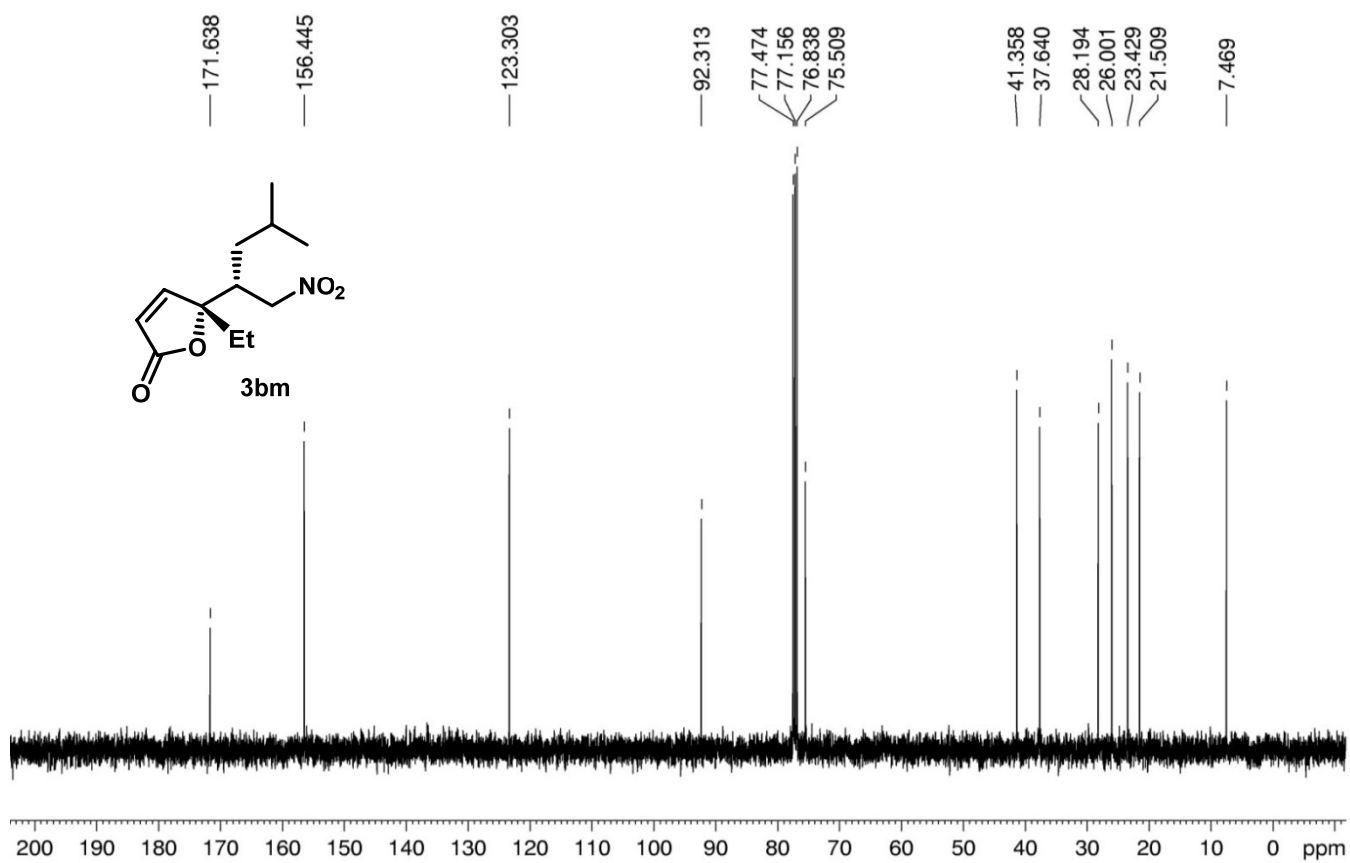

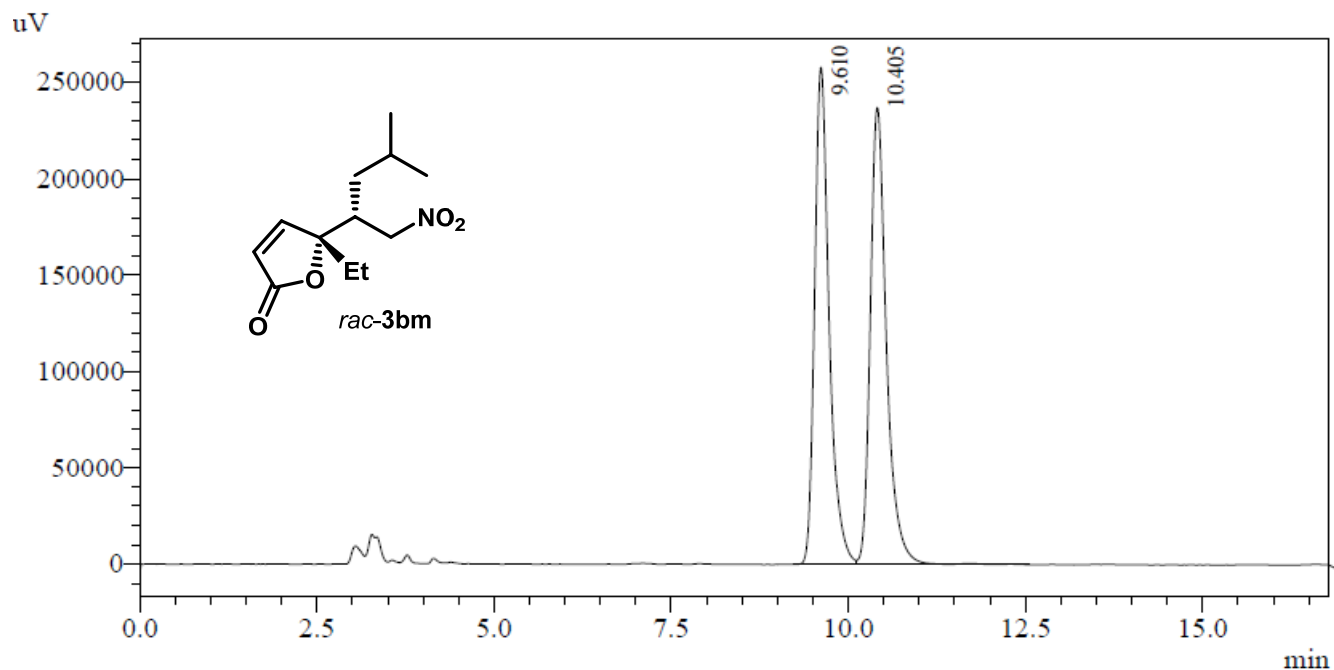

PeakTable

Detector A Ch1 210nm

| Peak# | Ret. Time | Area    | Area %  |
|-------|-----------|---------|---------|
| 1     | 9.610     | 3691389 | 49.694  |
| 2     | 10.405    | 3736792 | 50.306  |
| Total |           | 7428181 | 100.000 |

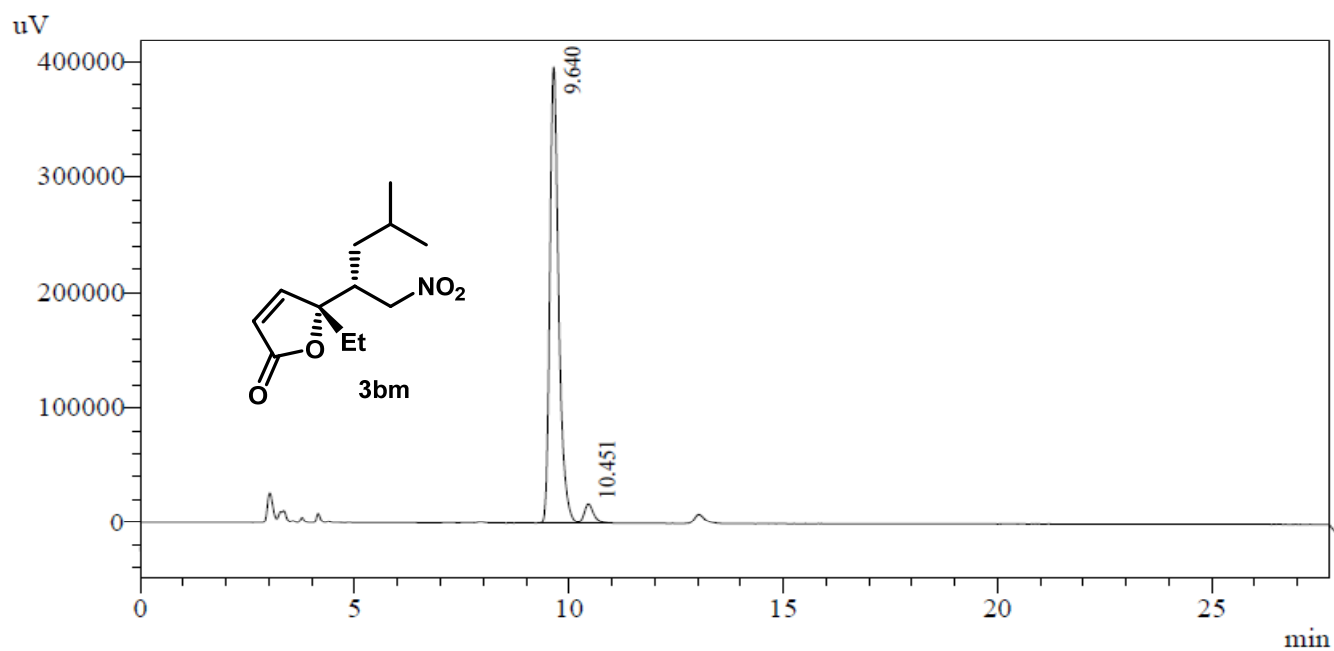

PeakTable

Detector A Ch1 210nm

| Peak# | Ret. Time | Area    | Area %  |
|-------|-----------|---------|---------|
| 1     | 9.640     | 5706384 | 95.543  |
| 2     | 10.451    | 266214  | 4.457   |
| Total |           | 5972598 | 100.000 |

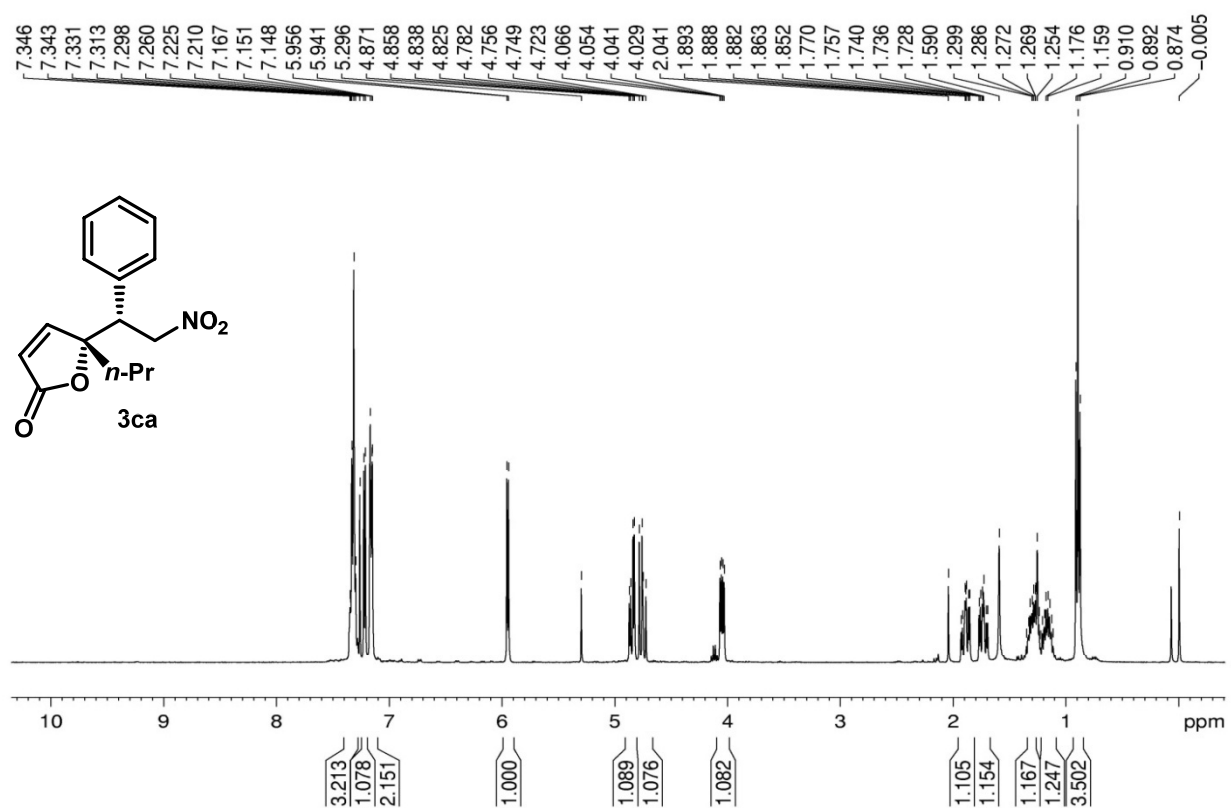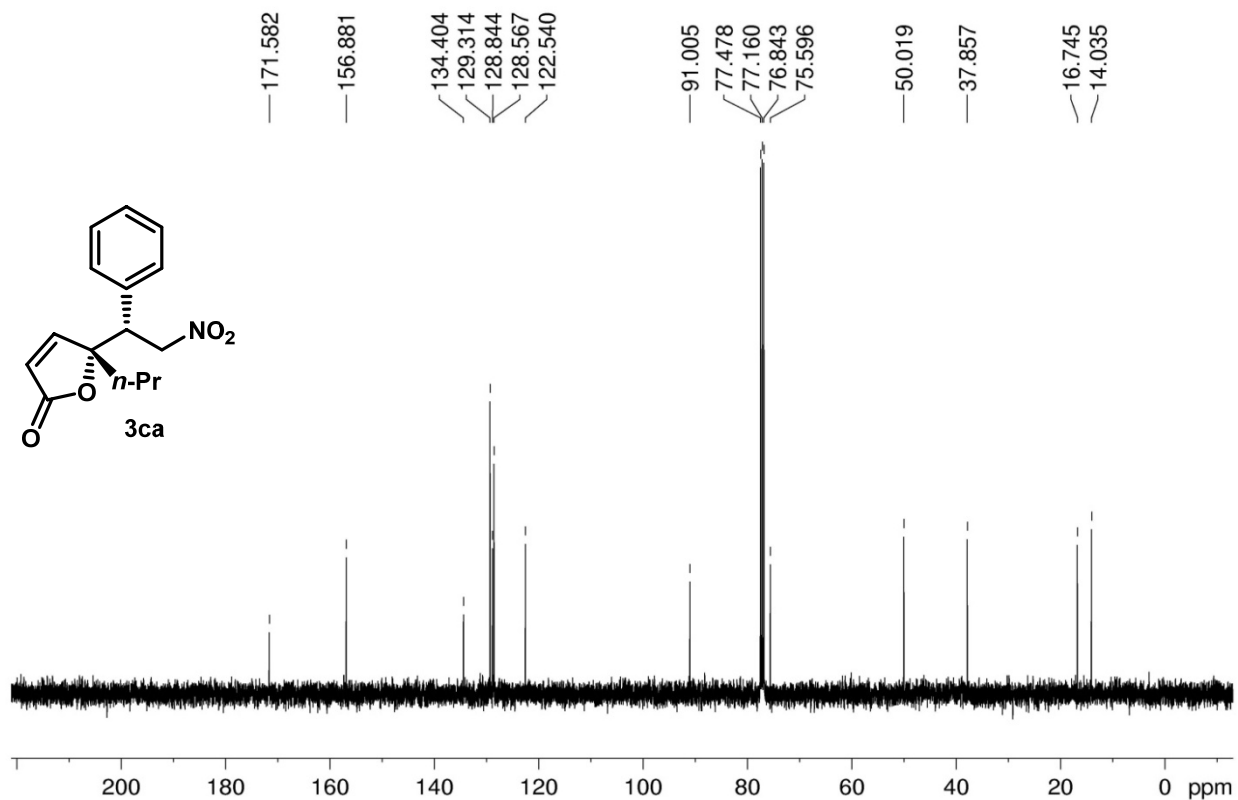

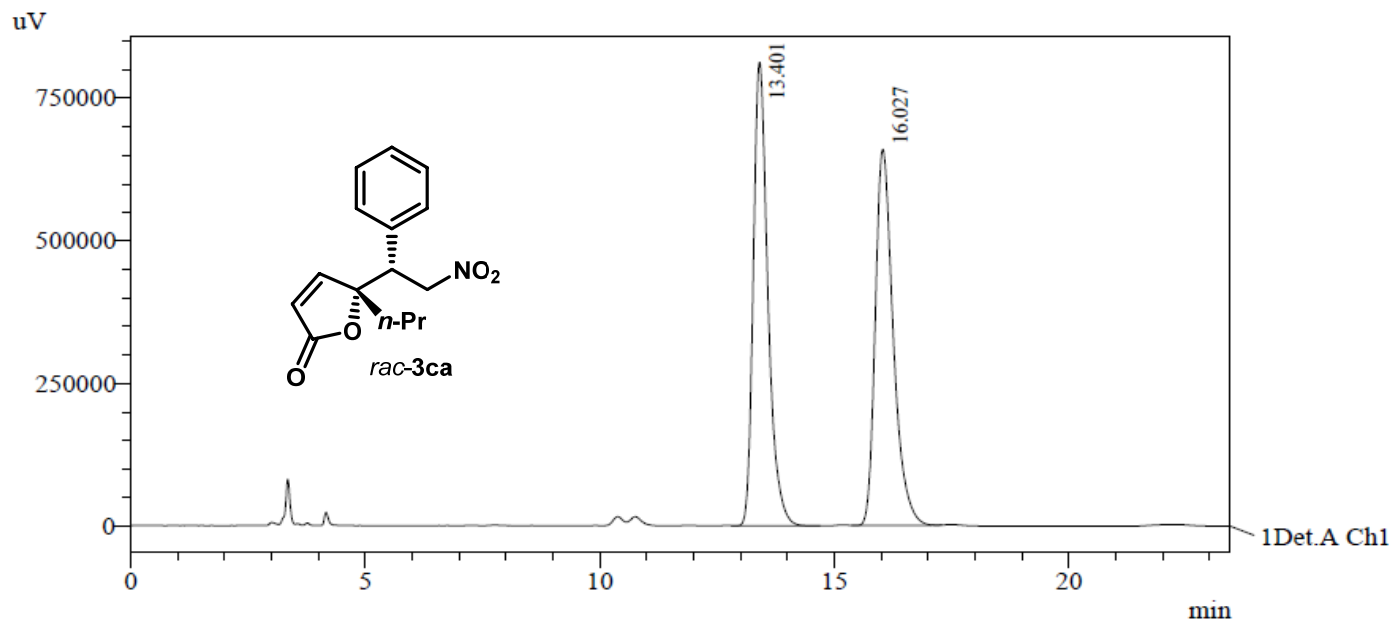

PeakTable

Detector A Ch1 210nm

| Peak# | Ret. Time | Area     | Area %  |
|-------|-----------|----------|---------|
| 1     | 13.401    | 17620843 | 50.036  |
| 2     | 16.027    | 17595667 | 49.964  |
| Total |           | 35216511 | 100.000 |

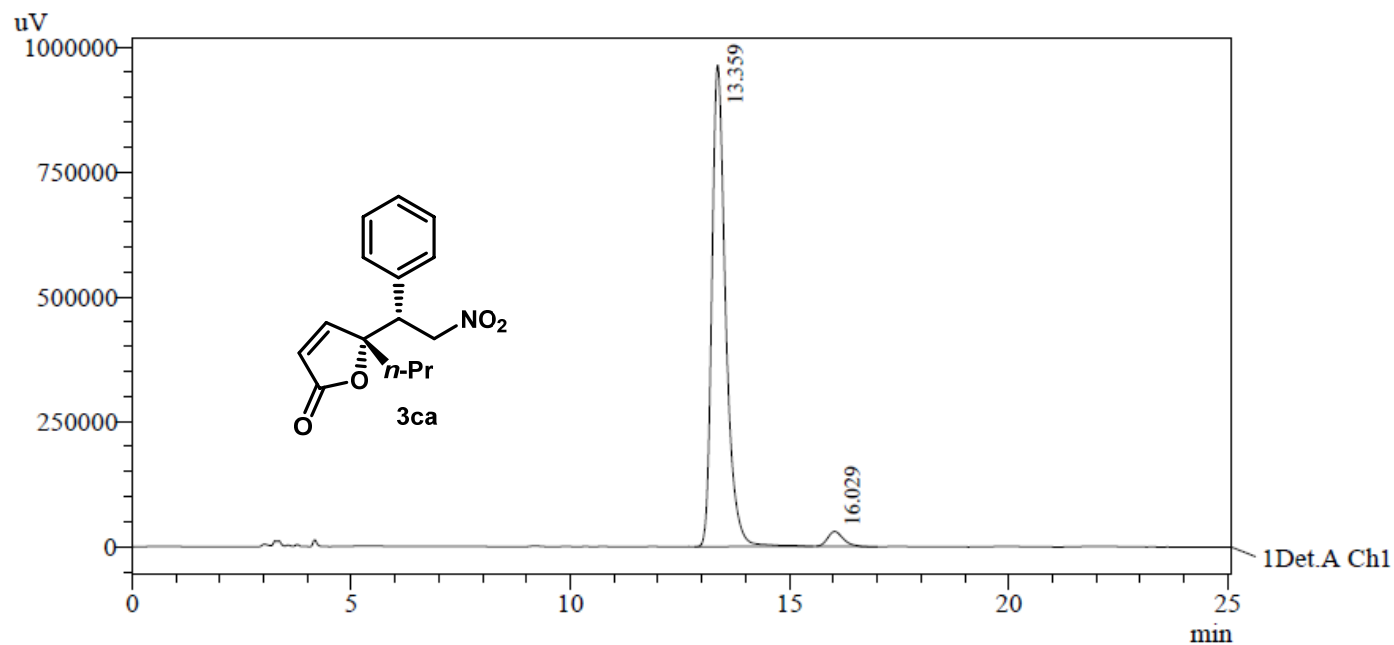

PeakTable

Detector A Ch1 210nm

| Peak# | Ret. Time | Area     | Area %  |
|-------|-----------|----------|---------|
| 1     | 13.359    | 21185237 | 96.617  |
| 2     | 16.029    | 741714   | 3.383   |
| Total |           | 21926951 | 100.000 |

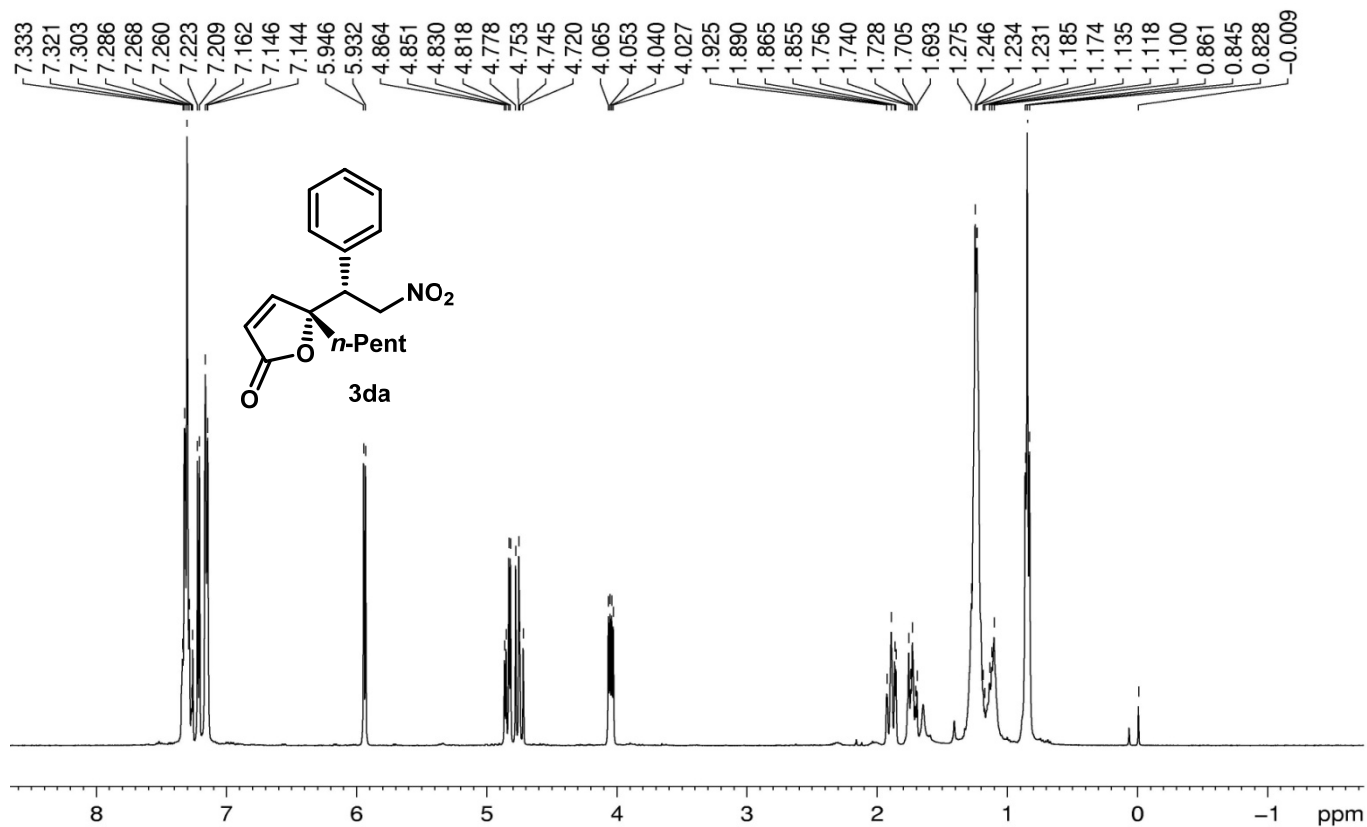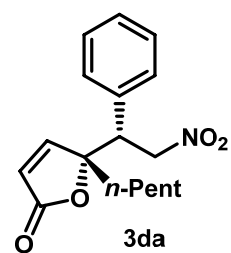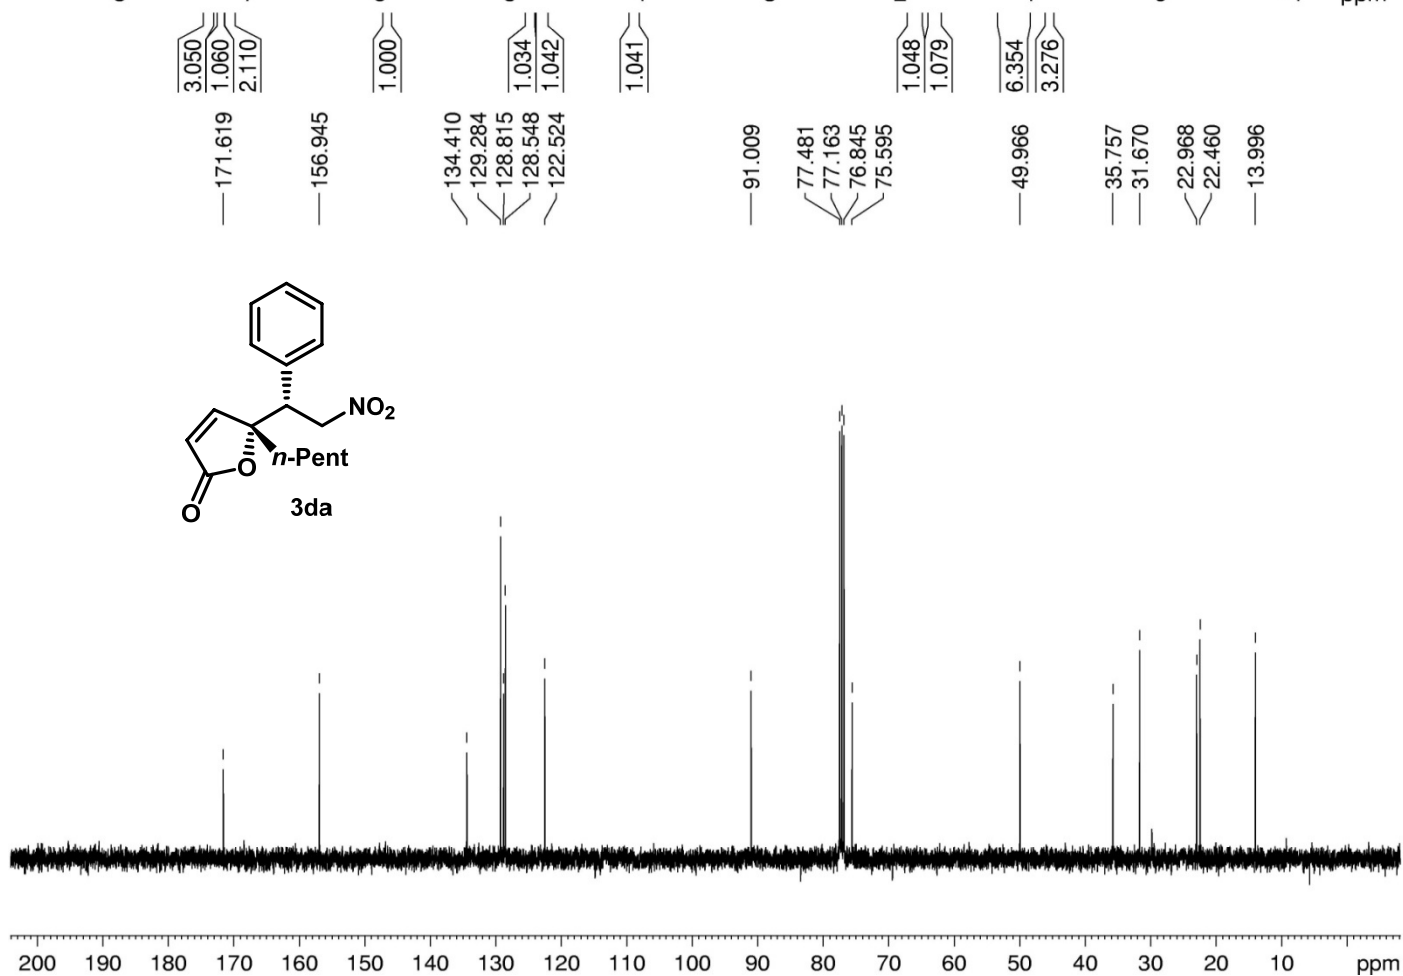

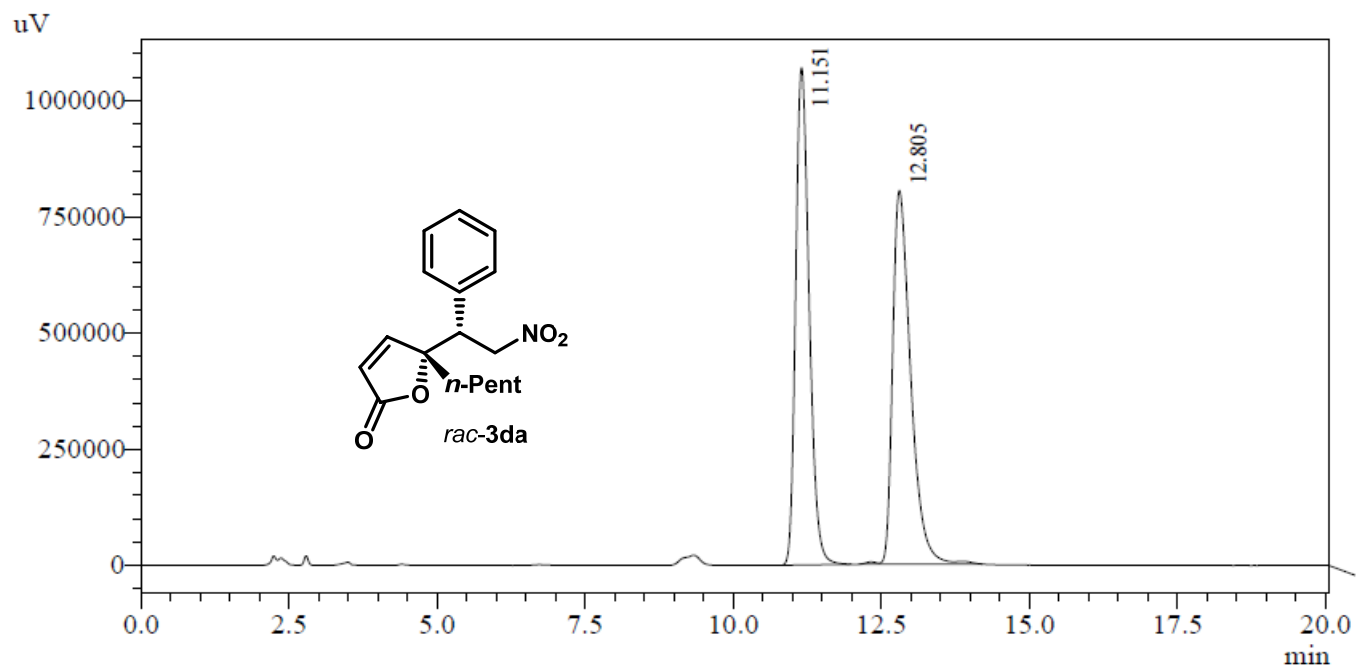

PeakTable

Detector A Ch1 210nm

| Peak# | Ret. Time | Area     | Area %  |
|-------|-----------|----------|---------|
| 1     | 11.151    | 16979737 | 49.797  |
| 2     | 12.805    | 17117919 | 50.203  |
| Total |           | 34097656 | 100.000 |

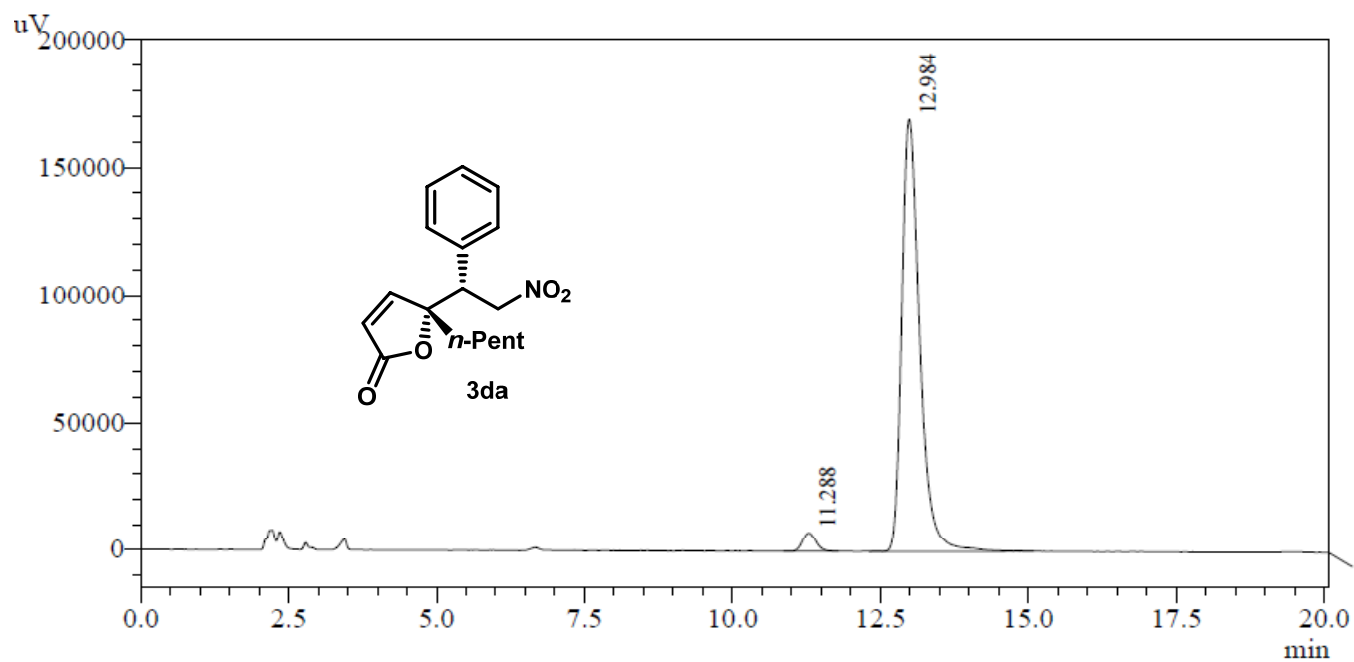

PeakTable

Detector A Ch1 210nm

| Peak# | Ret. Time | Area    | Area %  |
|-------|-----------|---------|---------|
| 1     | 11.288    | 120076  | 3.223   |
| 2     | 12.984    | 3605196 | 96.777  |
| Total |           | 3725272 | 100.000 |

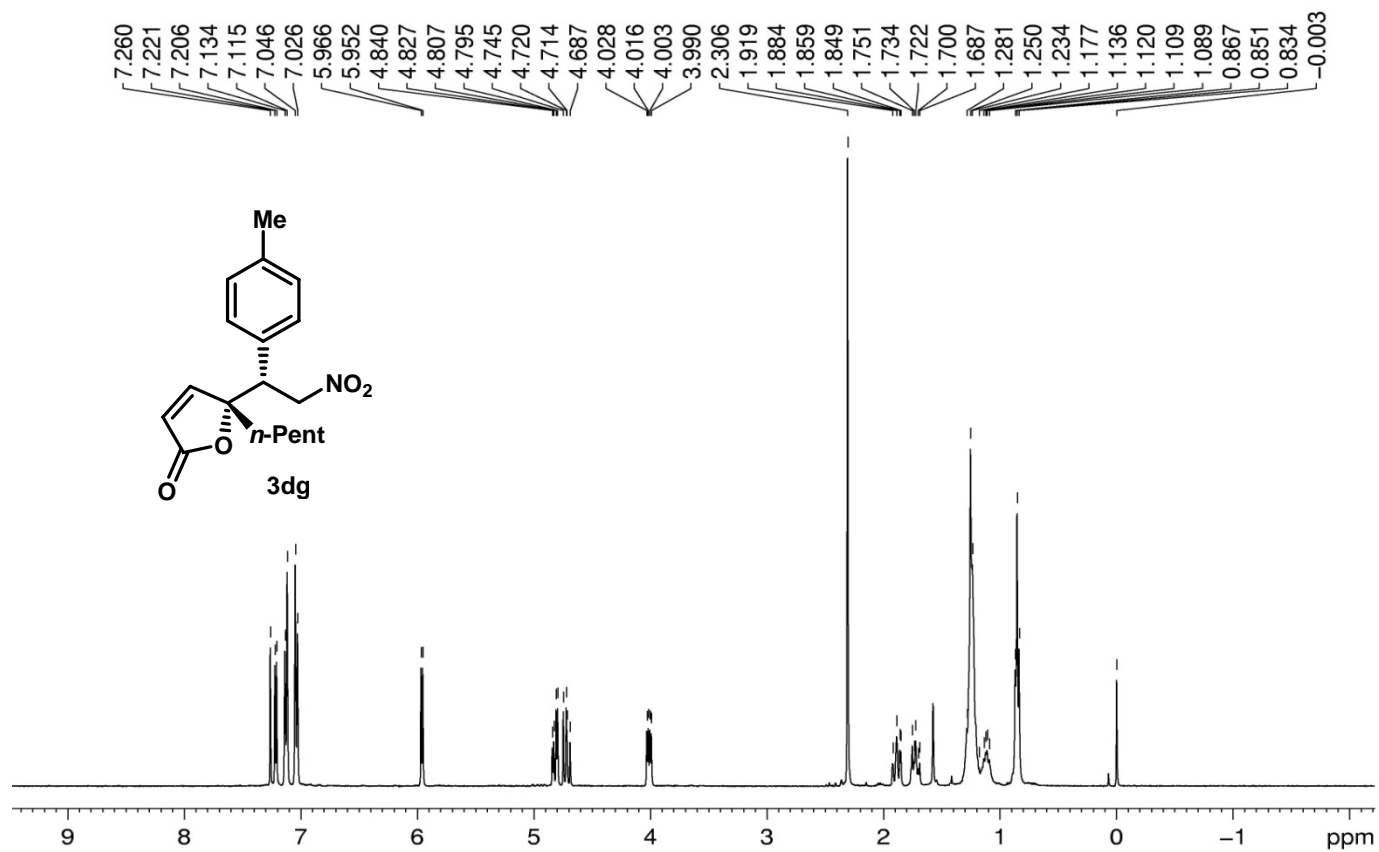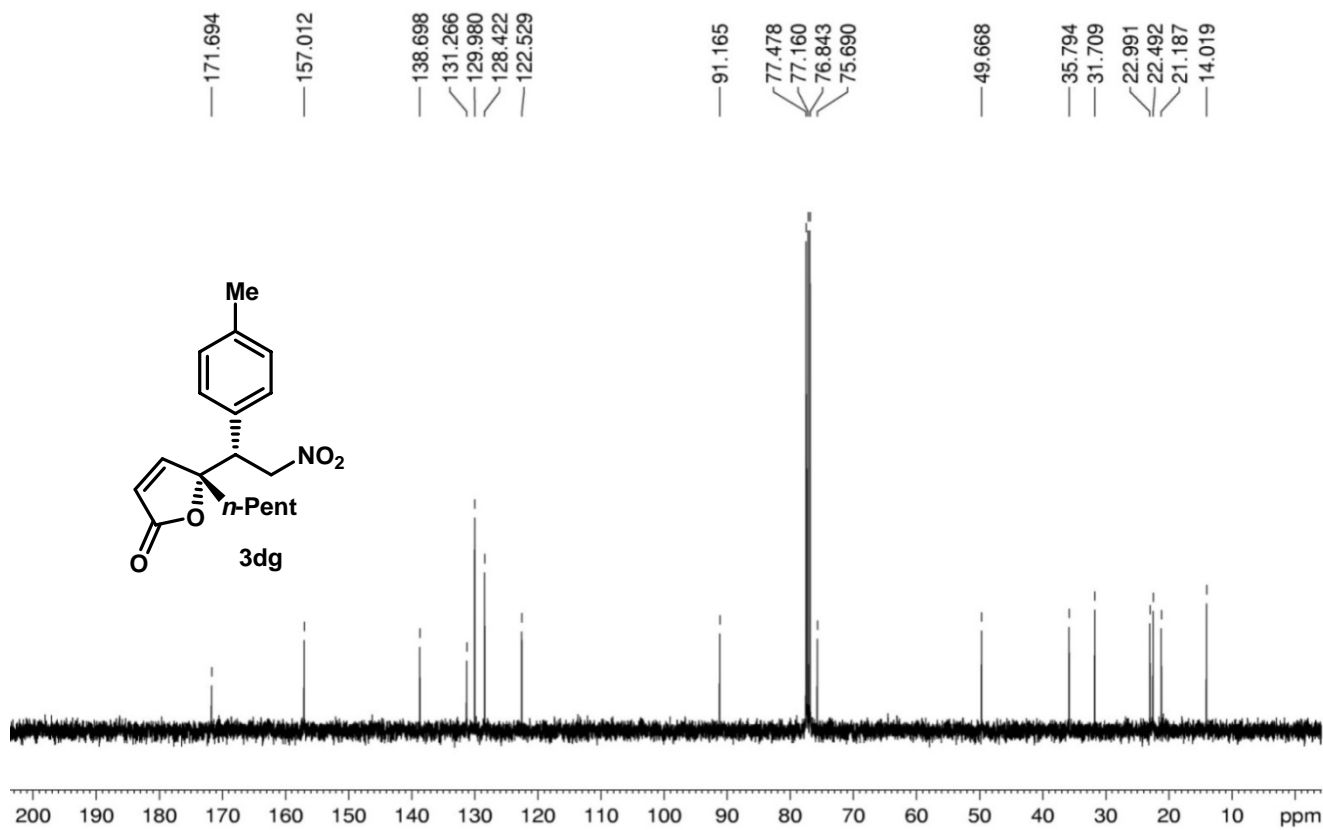

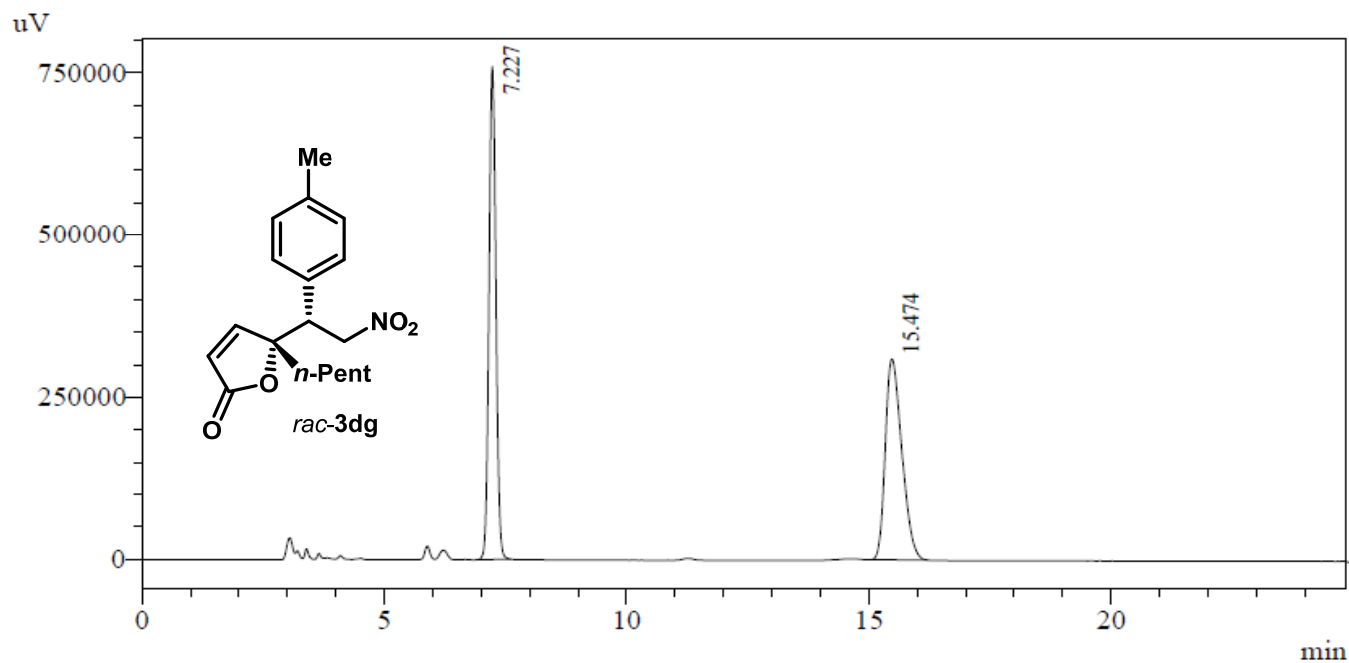

PeakTable

Detector A Ch1 210nm

| Peak# | Ret. Time | Area     | Area %  |
|-------|-----------|----------|---------|
| 1     | 7.227     | 7512496  | 50.495  |
| 2     | 15.474    | 7365090  | 49.505  |
| Total |           | 14877587 | 100.000 |

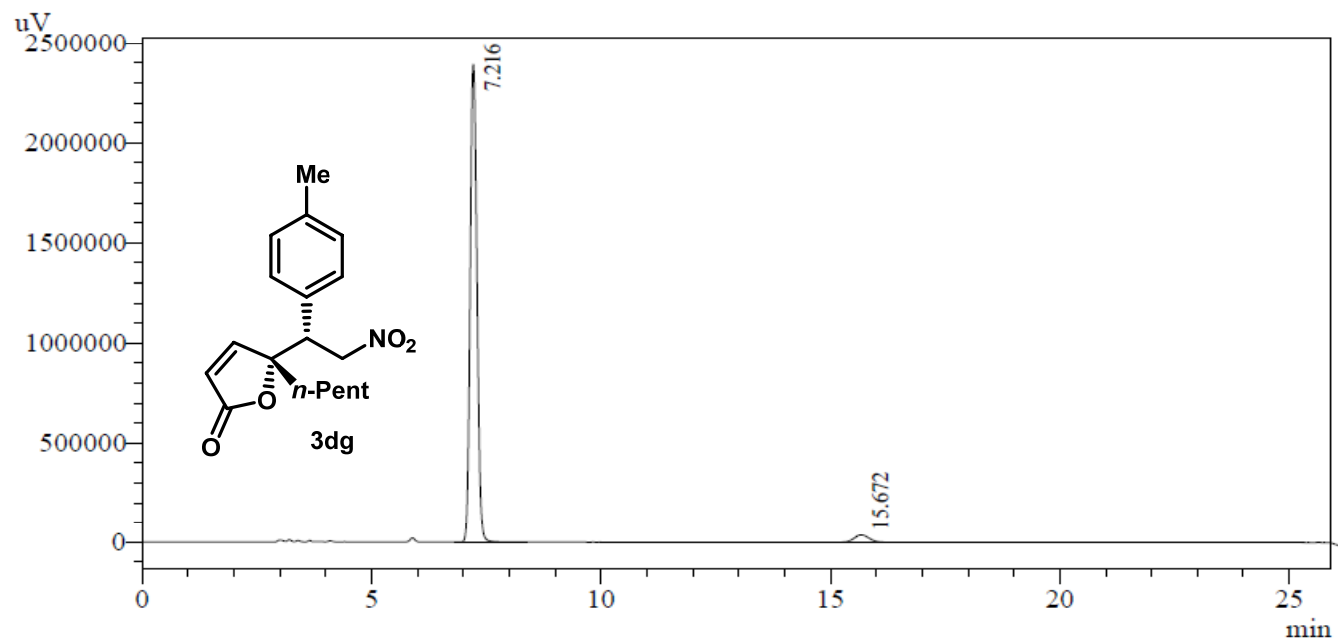

PeakTable

Detector A Ch1 210nm

| Peak# | Ret. Time | Area     | Area %  |
|-------|-----------|----------|---------|
| 1     | 7.216     | 24814386 | 96.682  |
| 2     | 15.672    | 851670   | 3.318   |
| Total |           | 25666056 | 100.000 |

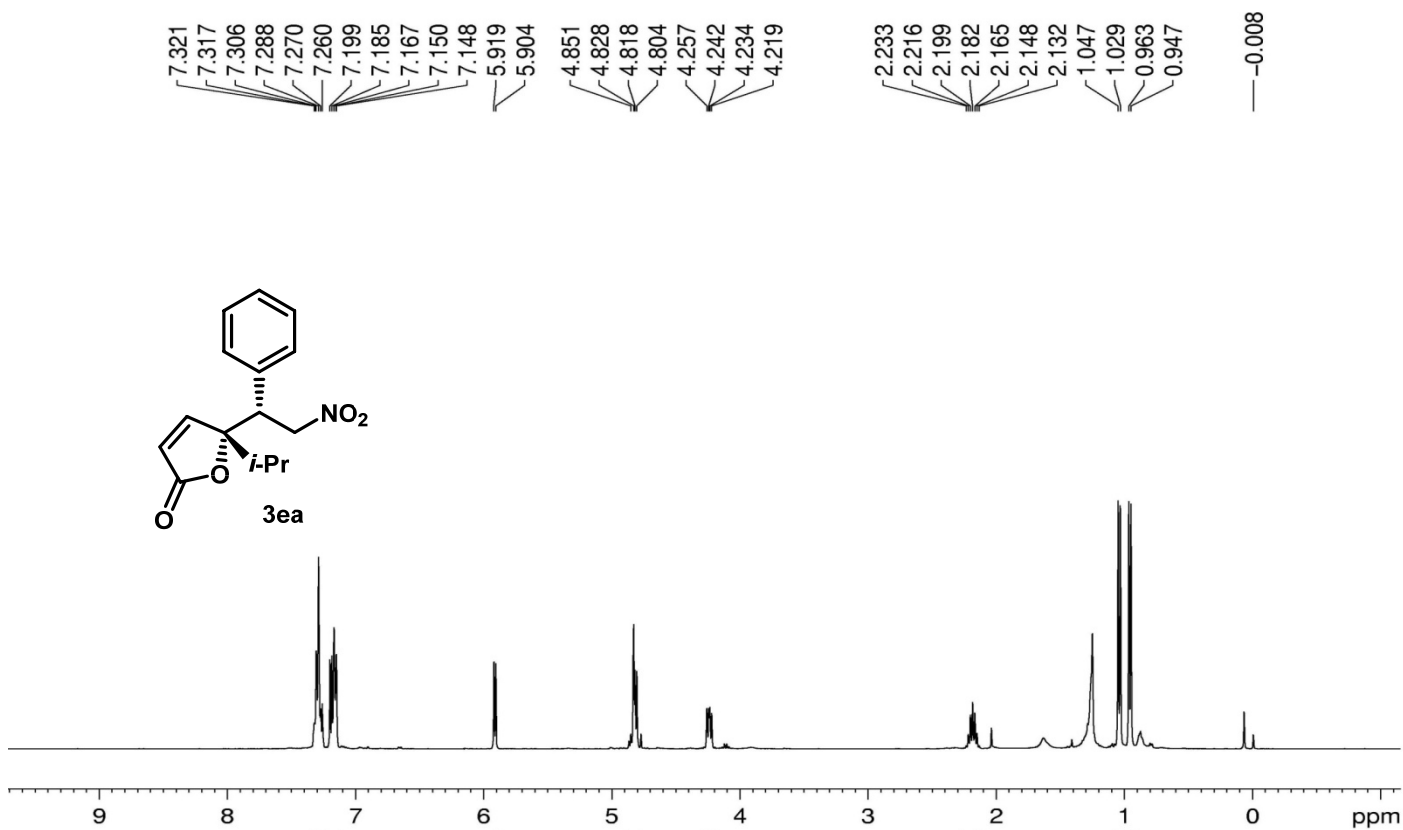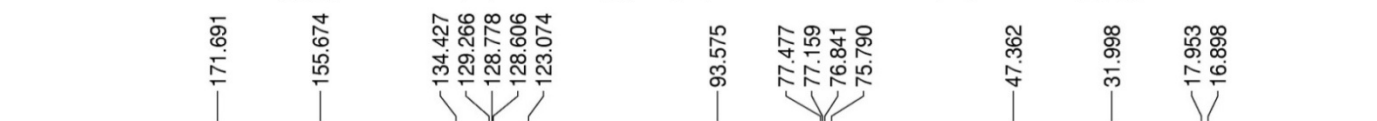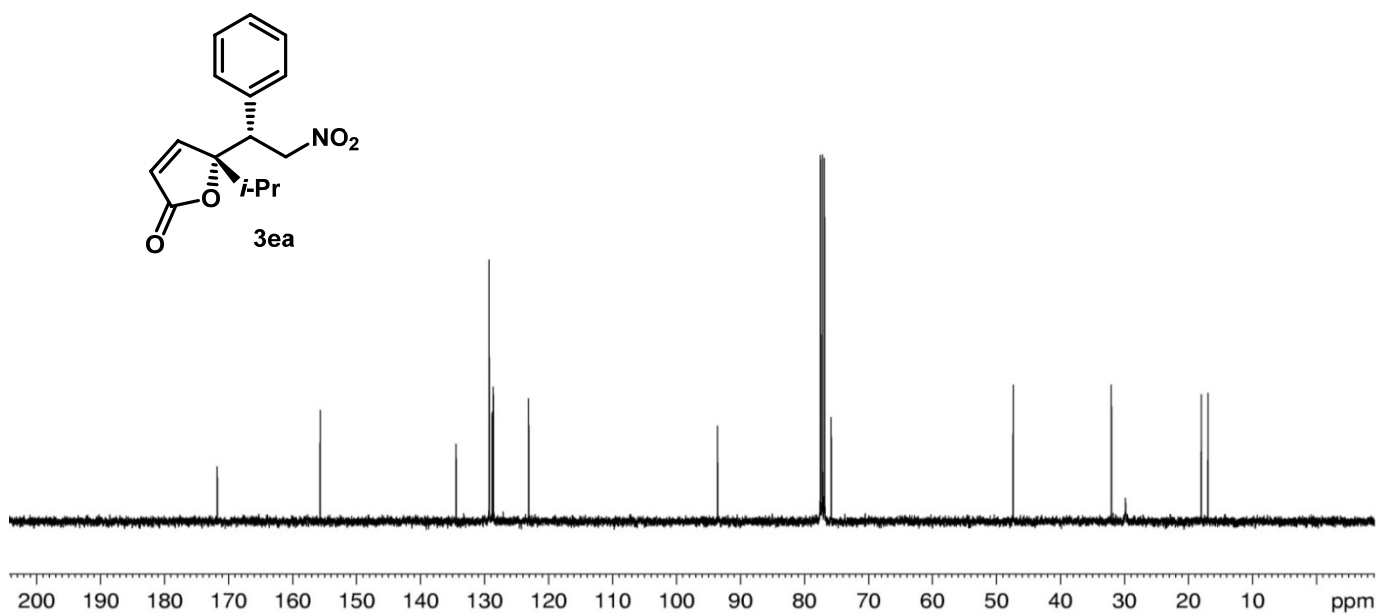

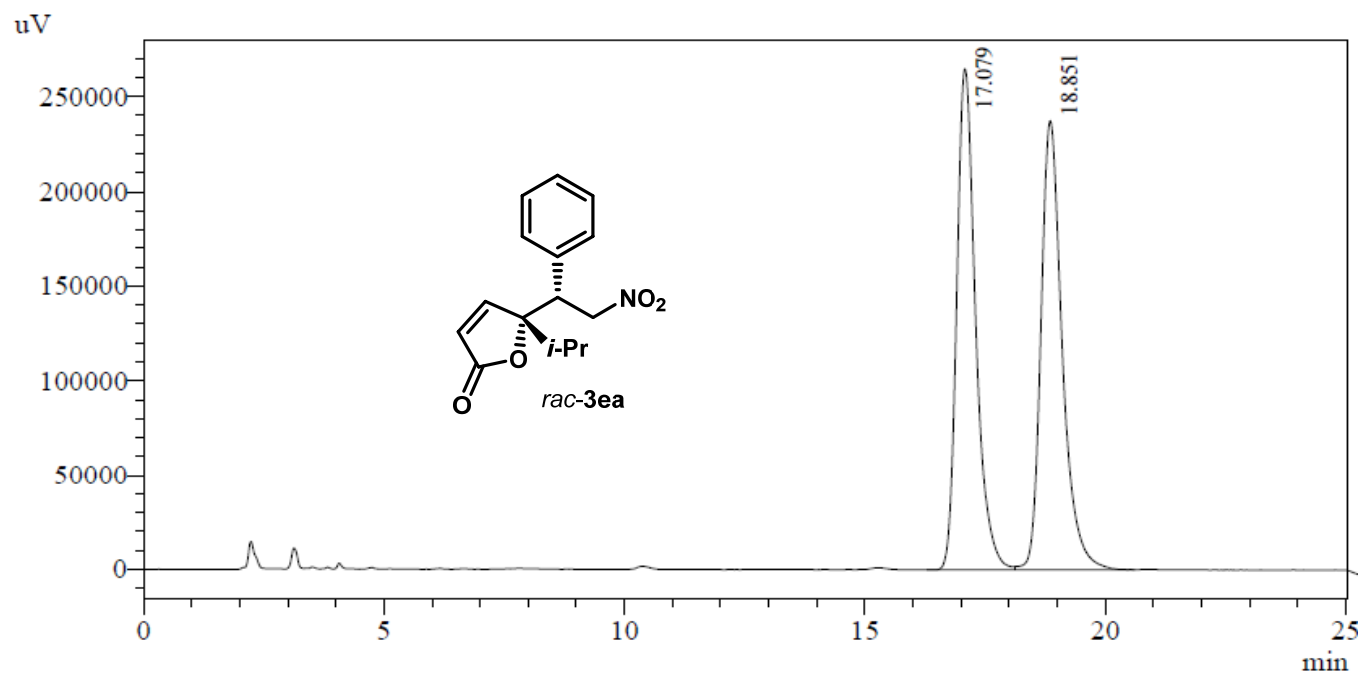

PeakTable

Detector A Ch1 210nm

| Peak# | Ret. Time | Area     | Area %  |
|-------|-----------|----------|---------|
| 1     | 17.079    | 7232318  | 49.640  |
| 2     | 18.851    | 7337111  | 50.360  |
| Total |           | 14569429 | 100.000 |

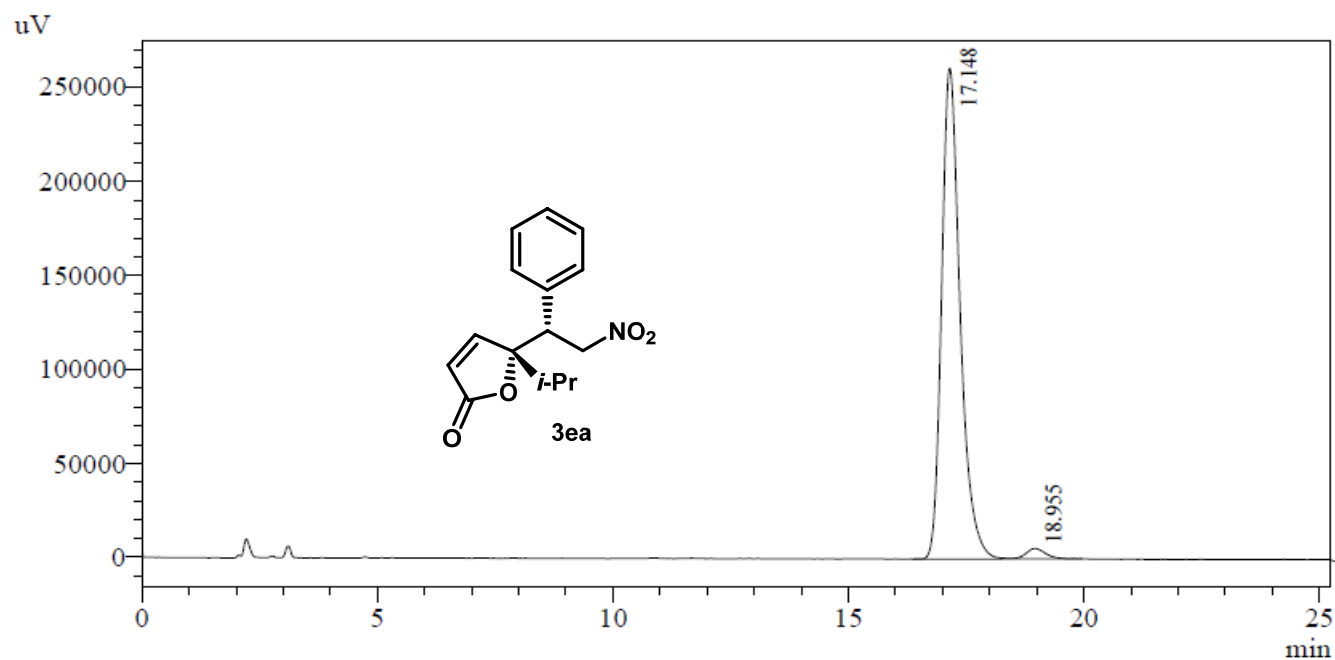

PeakTable

Detector A Ch1 210nm

| Peak# | Ret. Time | Area    | Area %  |
|-------|-----------|---------|---------|
| 1     | 17.148    | 7174208 | 97.819  |
| 2     | 18.955    | 159932  | 2.181   |
| Total |           | 7334140 | 100.000 |

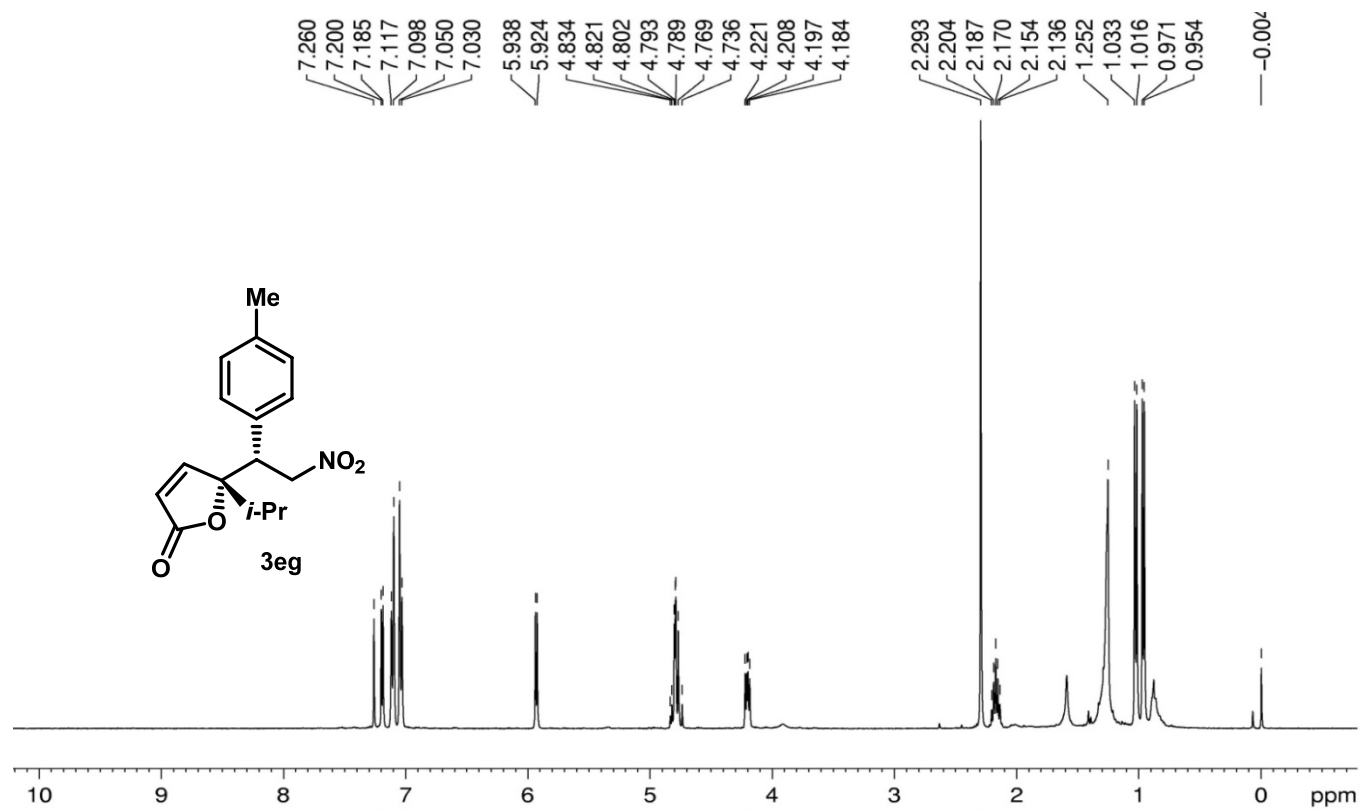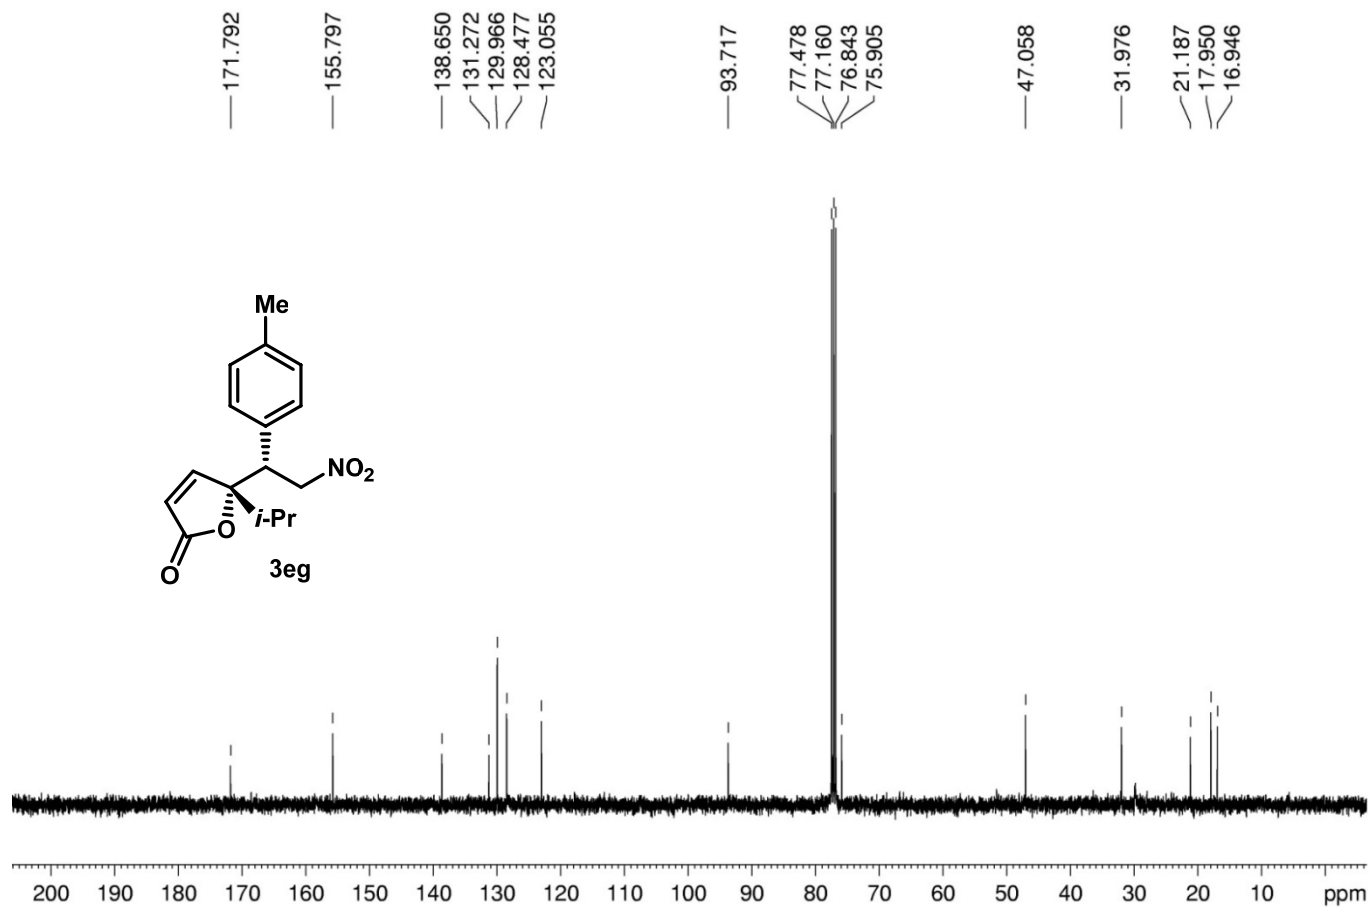

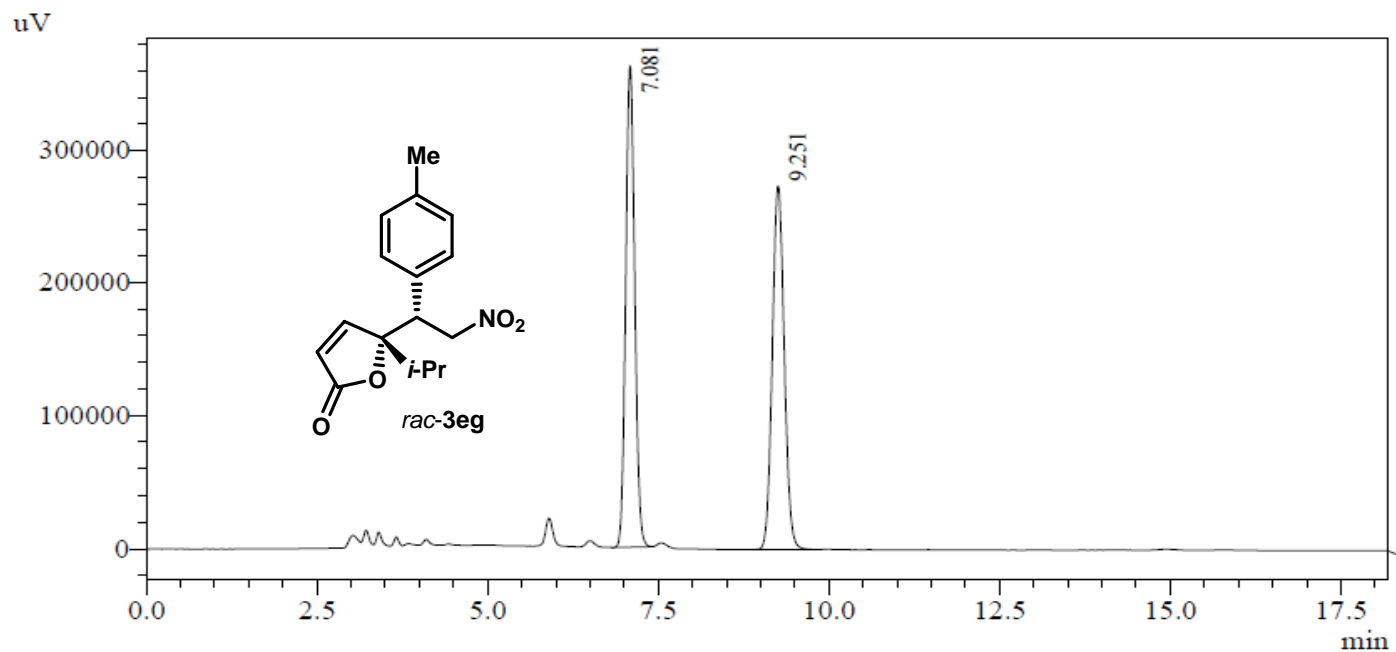

PeakTable

Detector A Ch1 210nm

| Peak# | Ret. Time | Area    | Area %  |
|-------|-----------|---------|---------|
| 1     | 7.081     | 3322008 | 50.039  |
| 2     | 9.251     | 3316804 | 49.961  |
| Total |           | 6638812 | 100.000 |

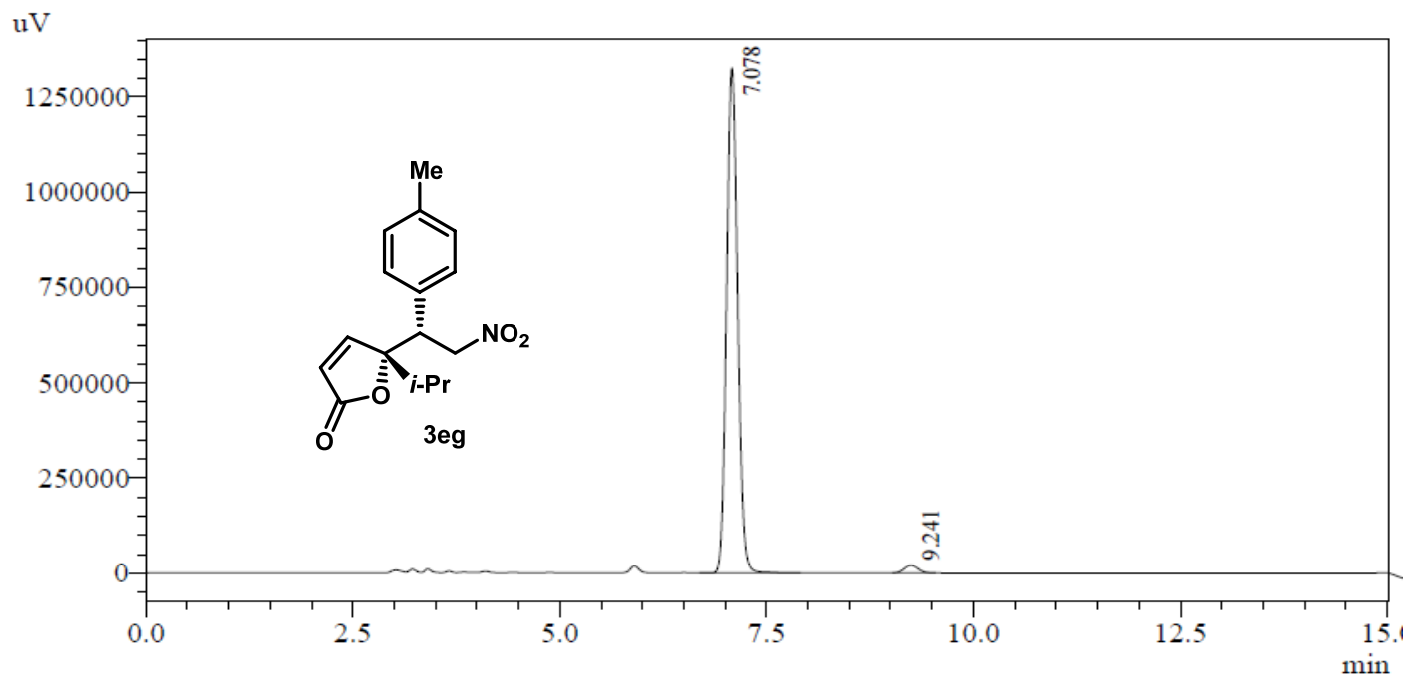

PeakTable

Detector A Ch1 210nm

| Peak# | Ret. Time | Area     | Area %  |
|-------|-----------|----------|---------|
| 1     | 7.078     | 12352408 | 98.022  |
| 2     | 9.241     | 249263   | 1.978   |
| Total |           | 12601671 | 100.000 |

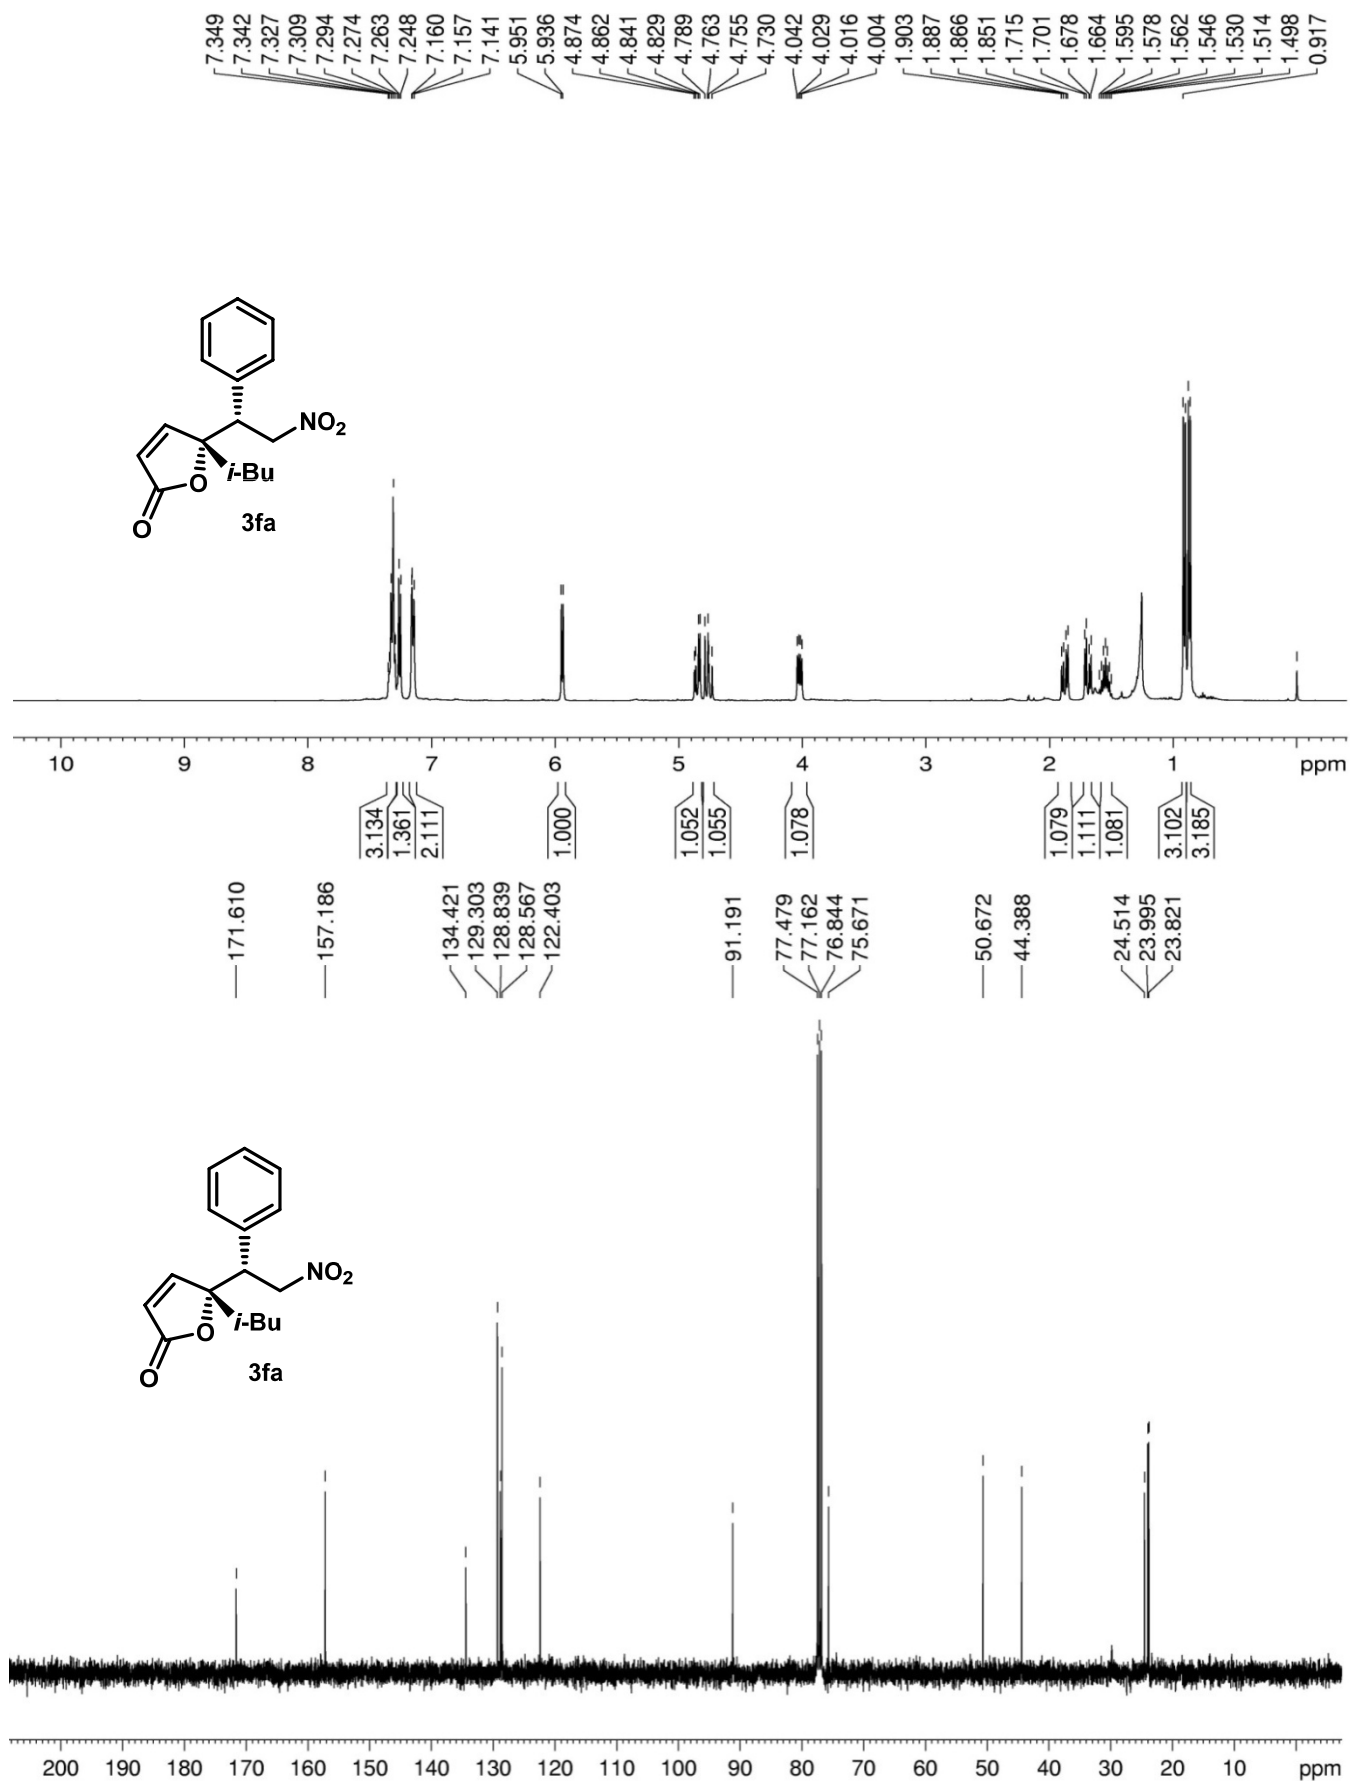

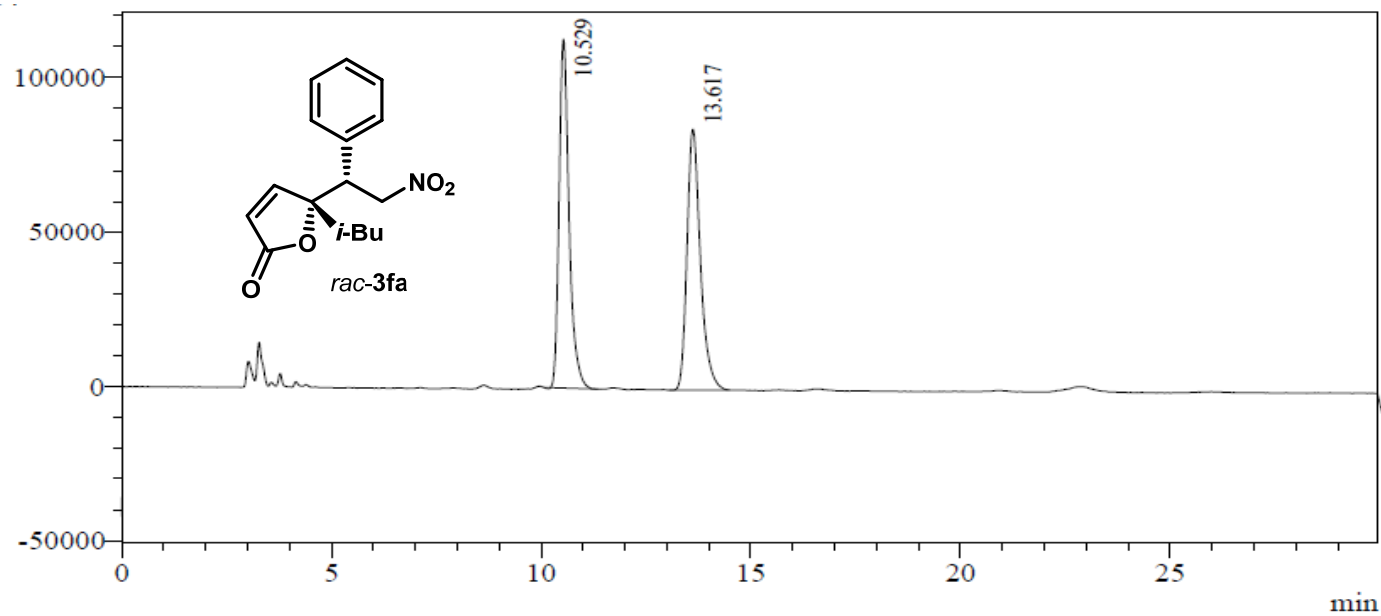

PeakTable

Detector A Ch1 210nm

| Peak# | Ret. Time | Area    | Area %  |
|-------|-----------|---------|---------|
| 1     | 10.529    | 1866644 | 50.000  |
| 2     | 13.617    | 1866670 | 50.000  |
| Total |           | 3733313 | 100.000 |

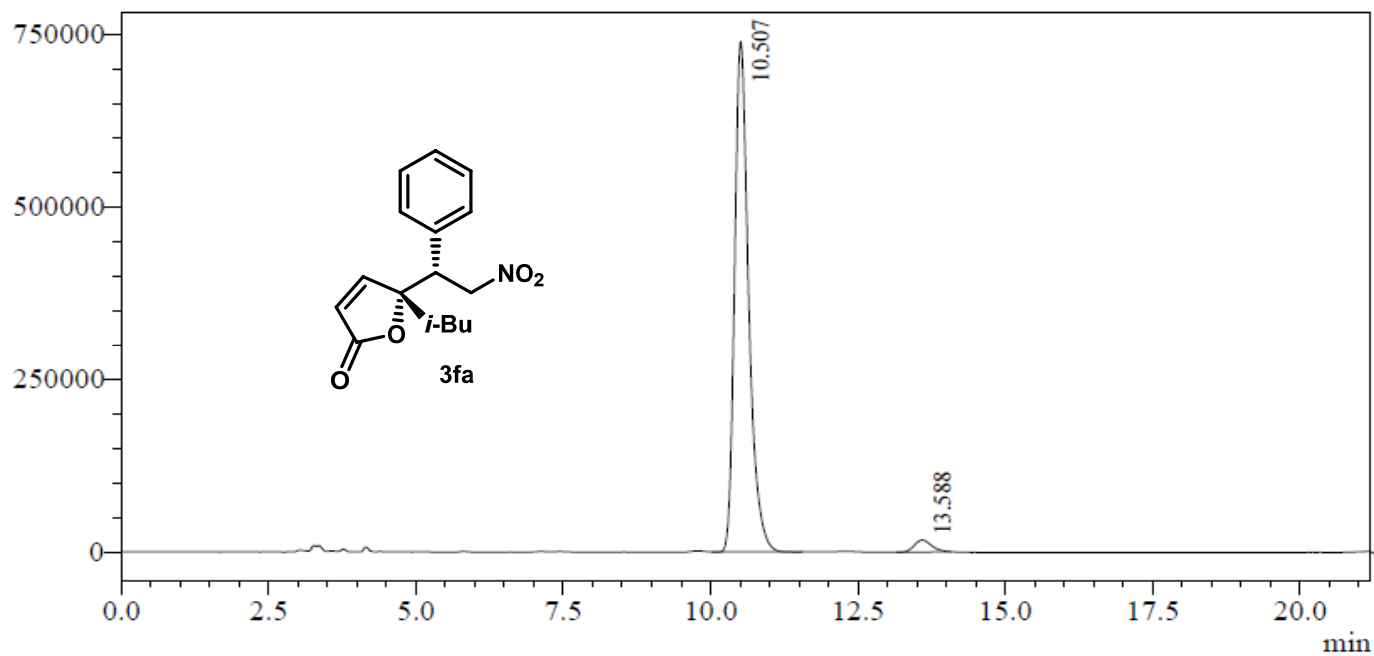

PeakTable

Detector A Ch1 210nm

| Peak# | Ret. Time | Area     | Area %  |
|-------|-----------|----------|---------|
| 1     | 10.507    | 12282651 | 97.168  |
| 2     | 13.588    | 357953   | 2.832   |
| Total |           | 12640604 | 100.000 |

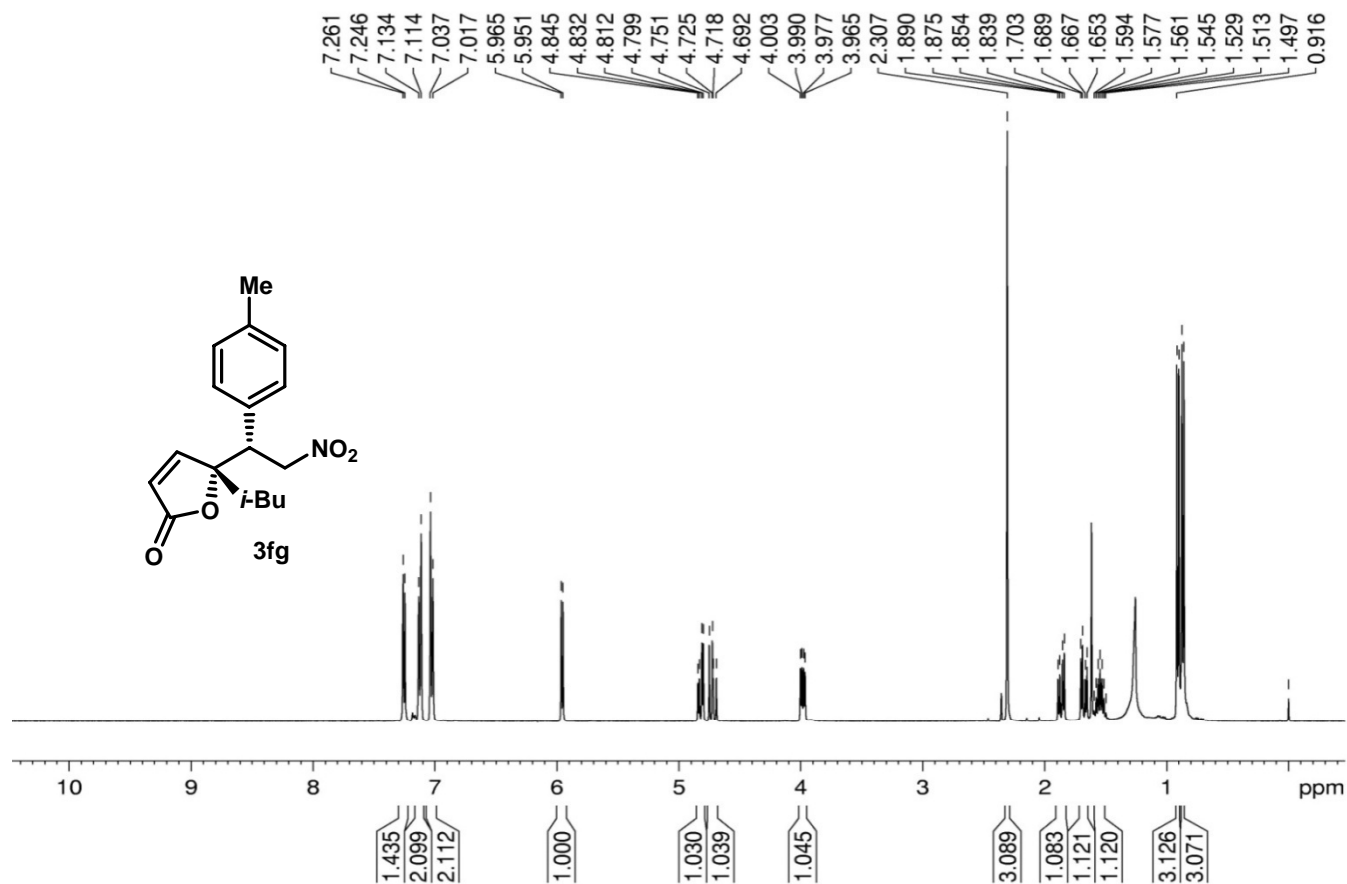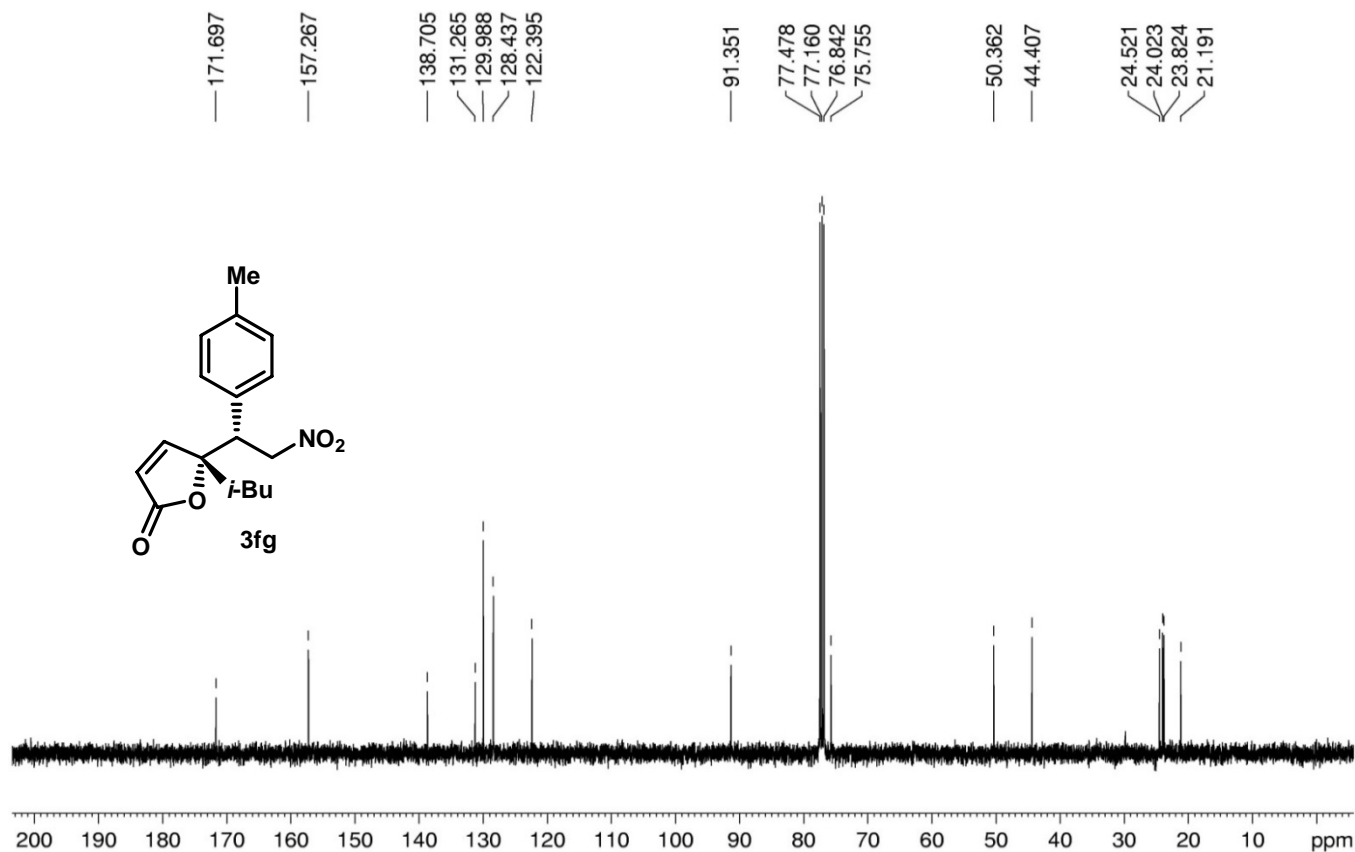

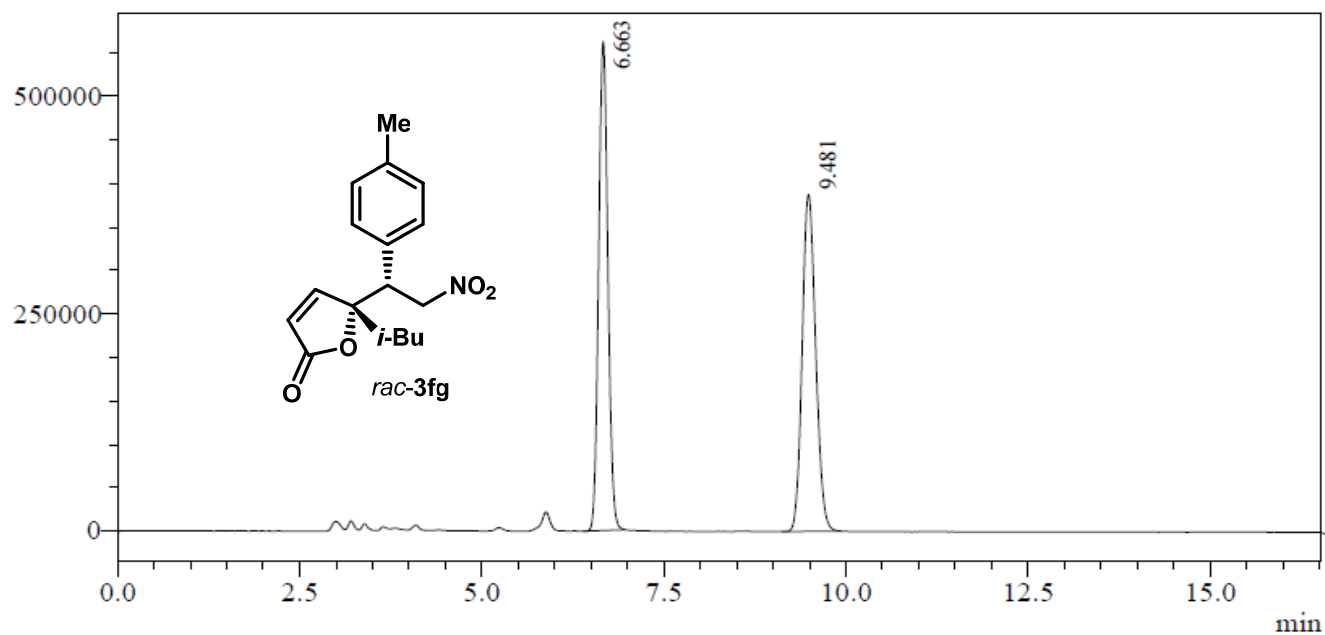

PeakTable

Detector A Ch1 210nm

| Peak# | Ret. Time | Area    | Area %  |
|-------|-----------|---------|---------|
| 1     | 6.663     | 4971897 | 49.844  |
| 2     | 9.481     | 5002944 | 50.156  |
| Total |           | 9974841 | 100.000 |

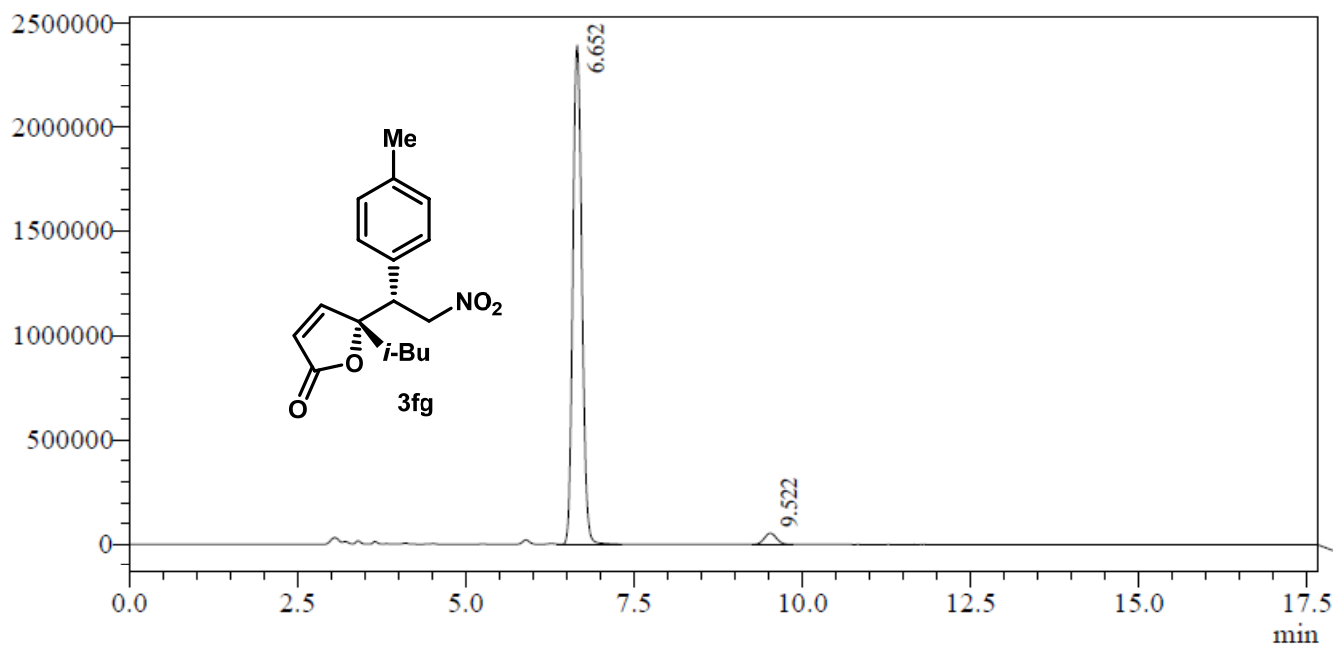

PeakTable

Detector A Ch1 210nm

| Peak# | Ret. Time | Area     | Area %  |
|-------|-----------|----------|---------|
| 1     | 6.652     | 22326543 | 97.013  |
| 2     | 9.522     | 687324   | 2.987   |
| Total |           | 23013868 | 100.000 |

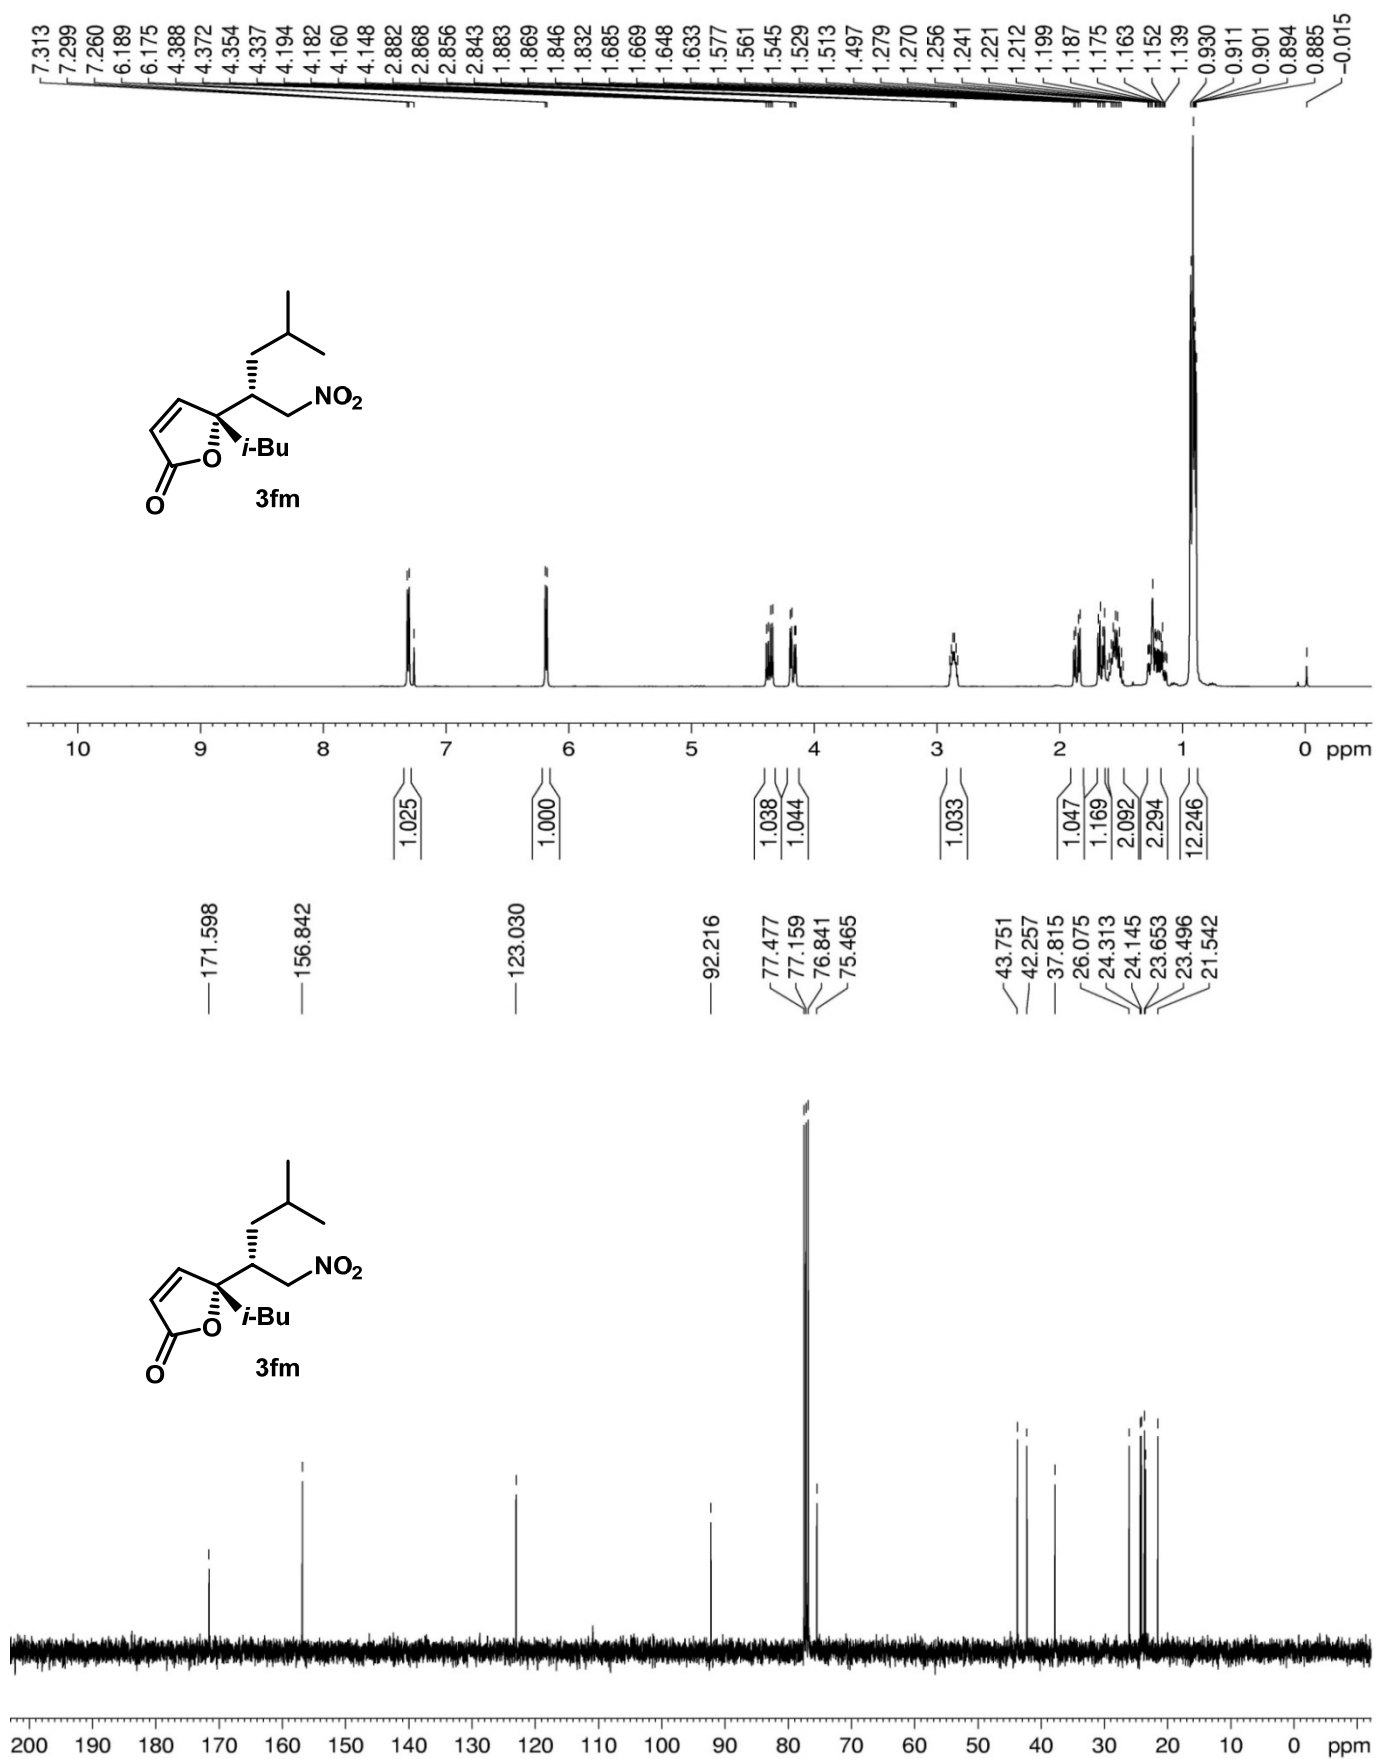

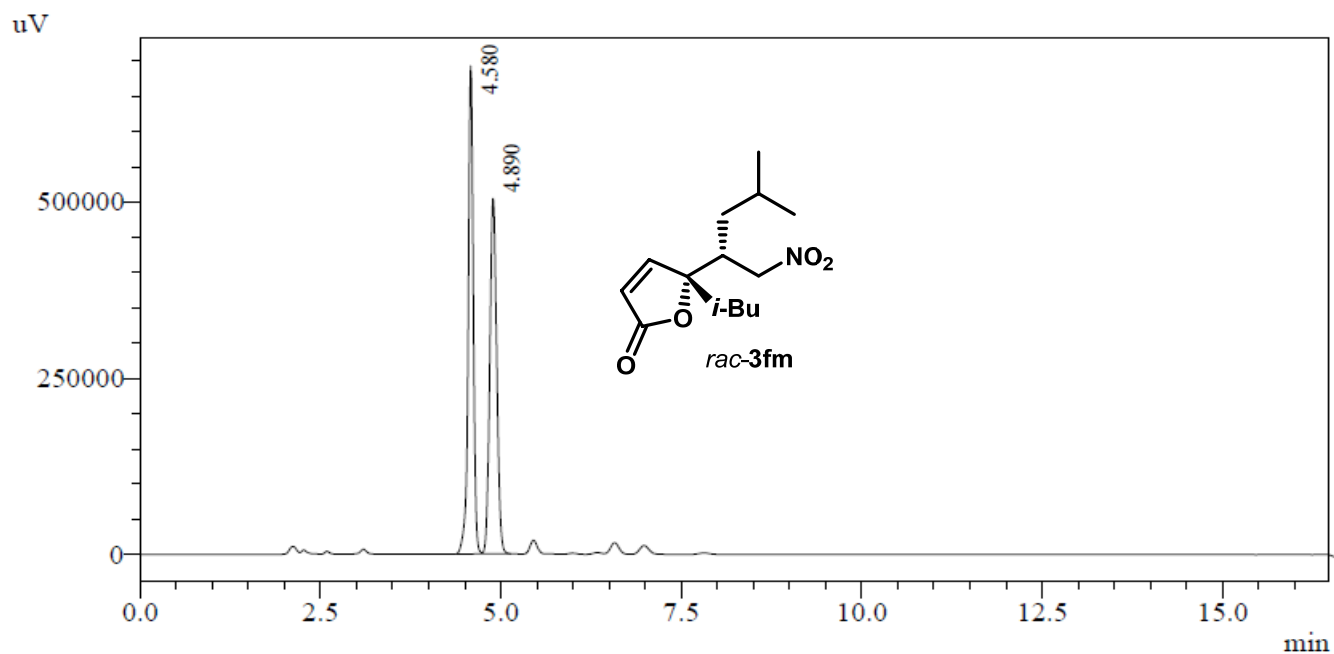

PeakTable

Detector A Ch1 210nm

| Peak# | Ret. Time | Area    | Area %  |
|-------|-----------|---------|---------|
| 1     | 4.580     | 3365054 | 49.947  |
| 2     | 4.890     | 3372221 | 50.053  |
| Total |           | 6737275 | 100.000 |

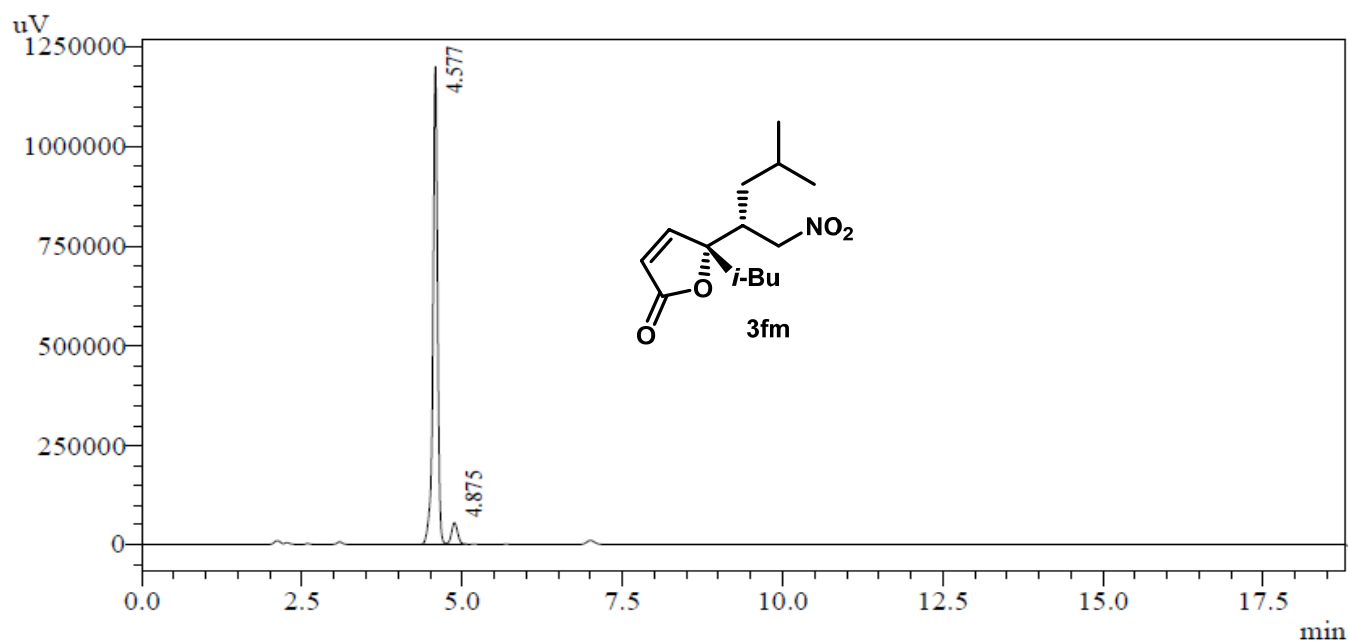

PeakTable

Detector A Ch1 210nm

| Peak# | Ret. Time | Area    | Area %  |
|-------|-----------|---------|---------|
| 1     | 4.577     | 5937933 | 94.266  |
| 2     | 4.875     | 361193  | 5.734   |
| Total |           | 6299126 | 100.000 |

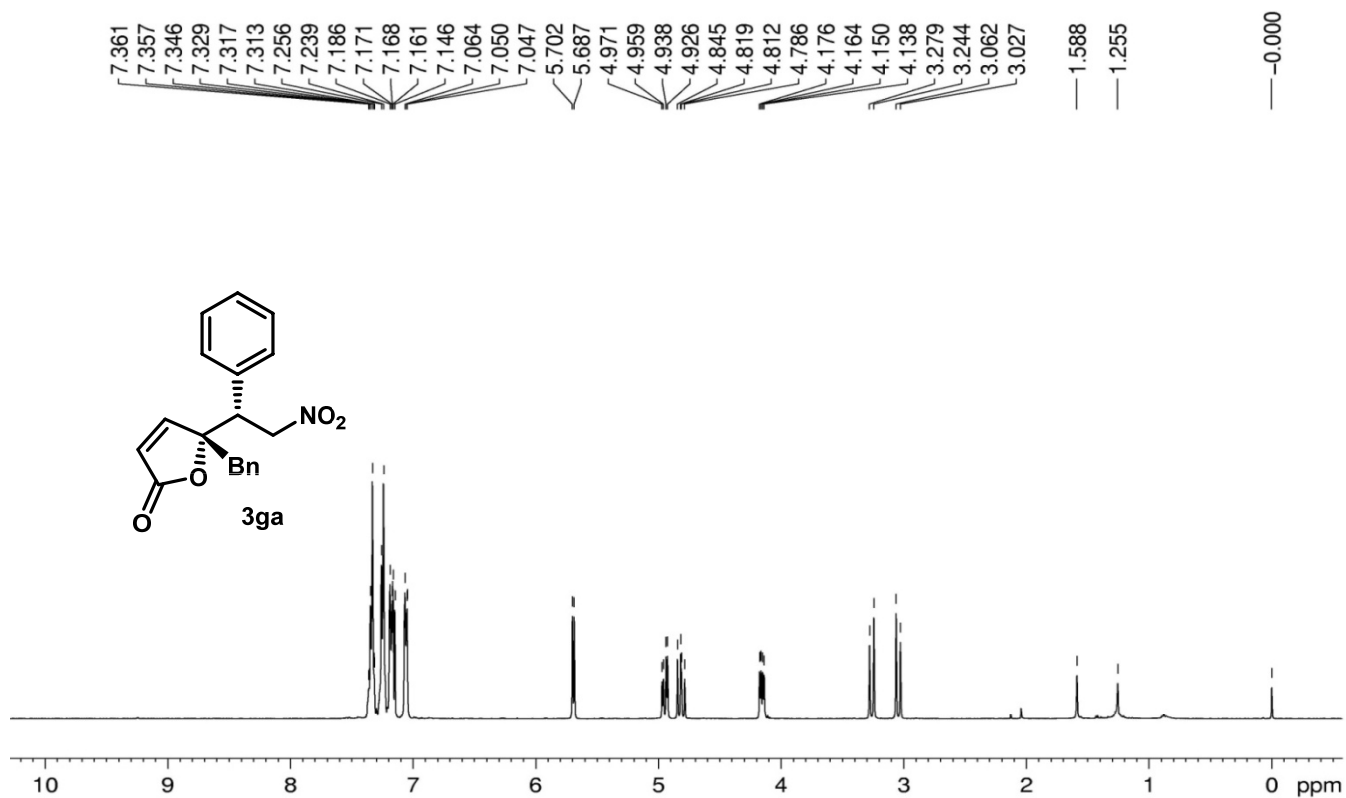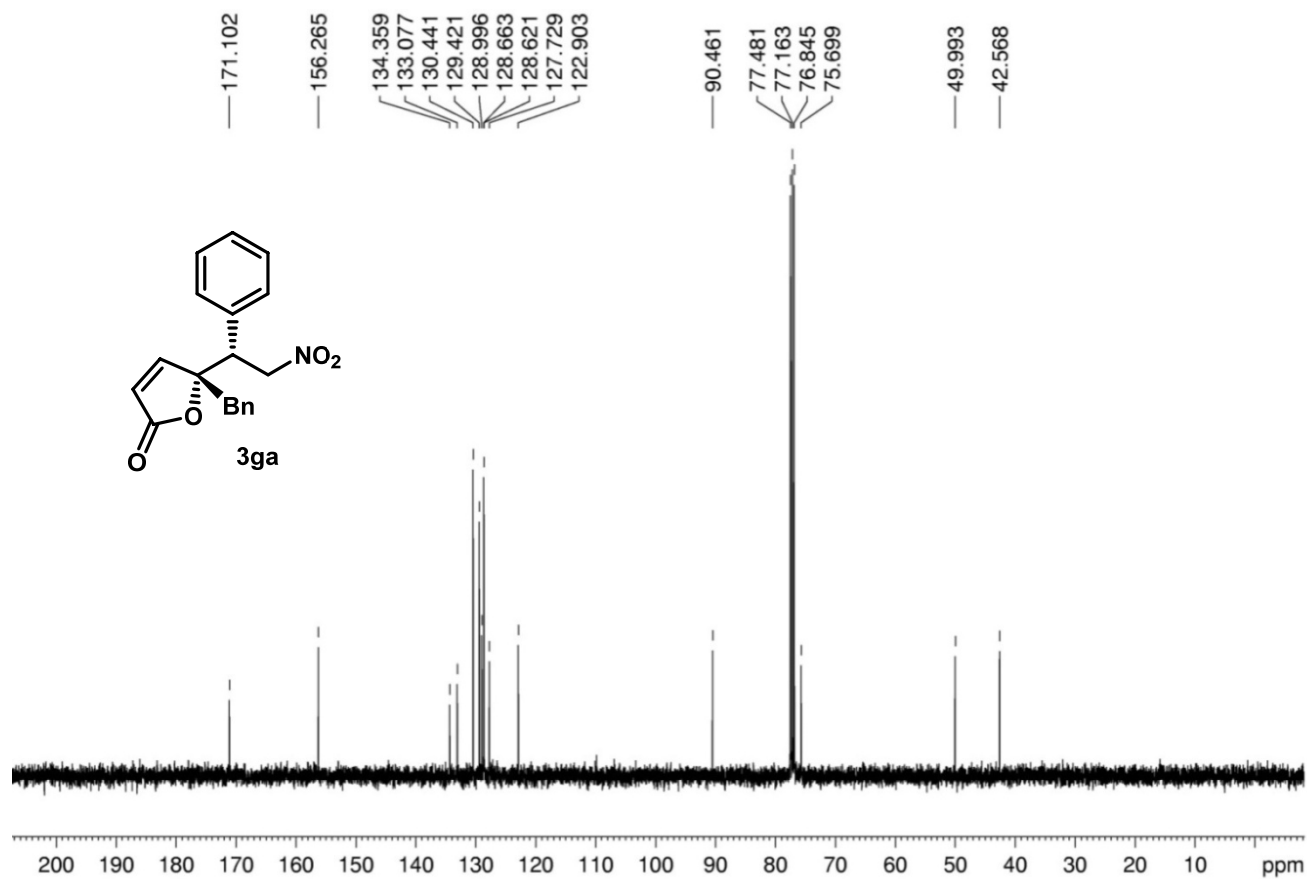

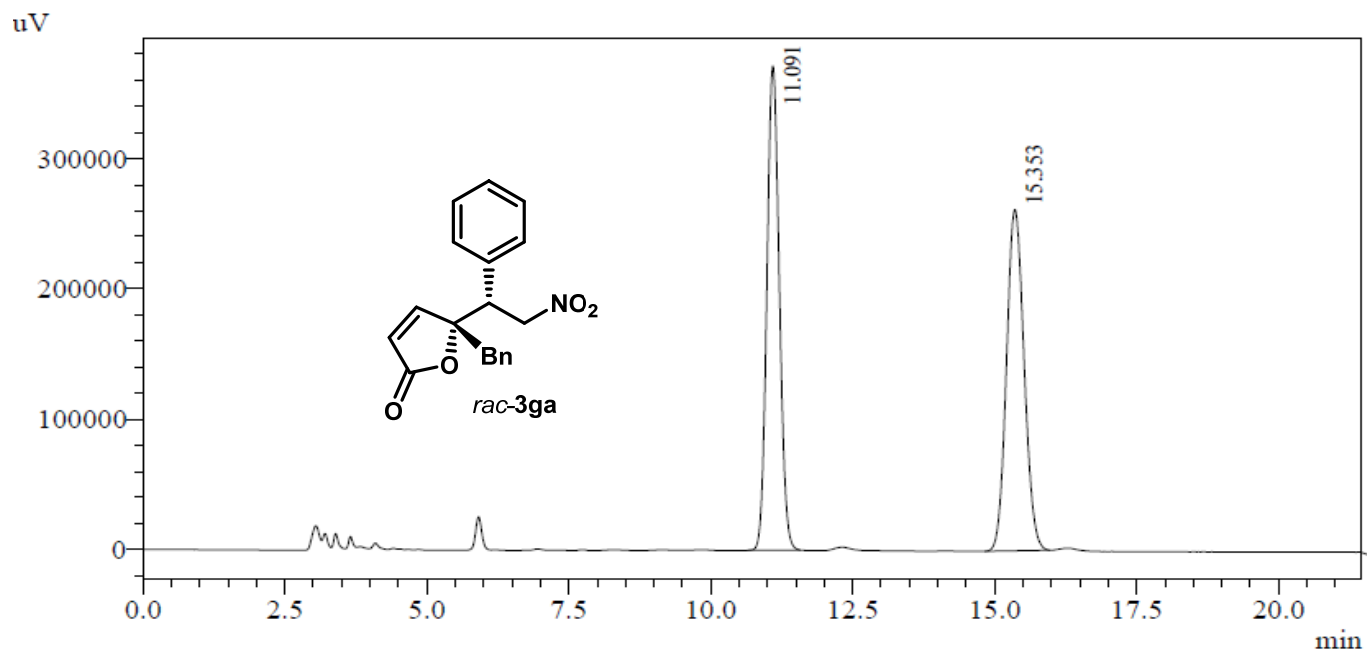

PeakTable

Detector A Ch1 210nm

| Peak# | Ret. Time | Area     | Area %  |
|-------|-----------|----------|---------|
| 1     | 11.091    | 5652608  | 49.980  |
| 2     | 15.353    | 5657043  | 50.020  |
| Total |           | 11309651 | 100.000 |

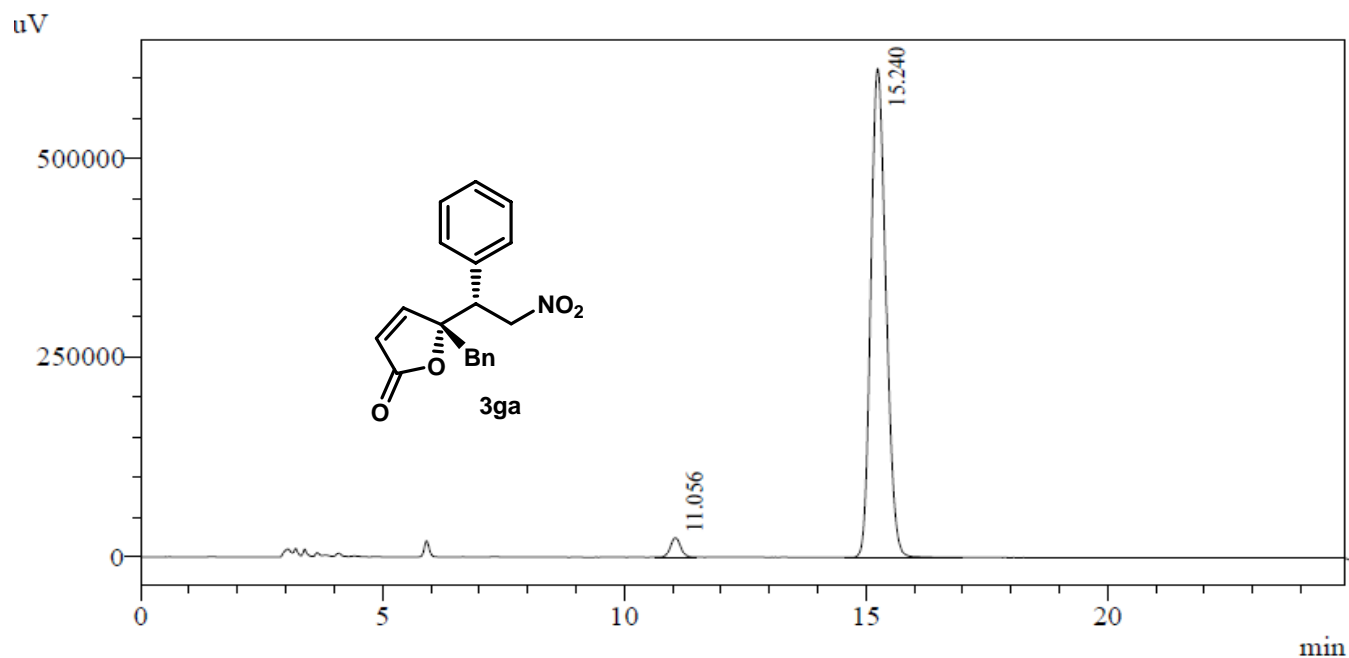

PeakTable

Detector A Ch1 210nm

| Peak# | Ret. Time | Area     | Area %  |
|-------|-----------|----------|---------|
| 1     | 11.056    | 378656   | 2.746   |
| 2     | 15.240    | 13409862 | 97.254  |
| Total |           | 13788519 | 100.000 |

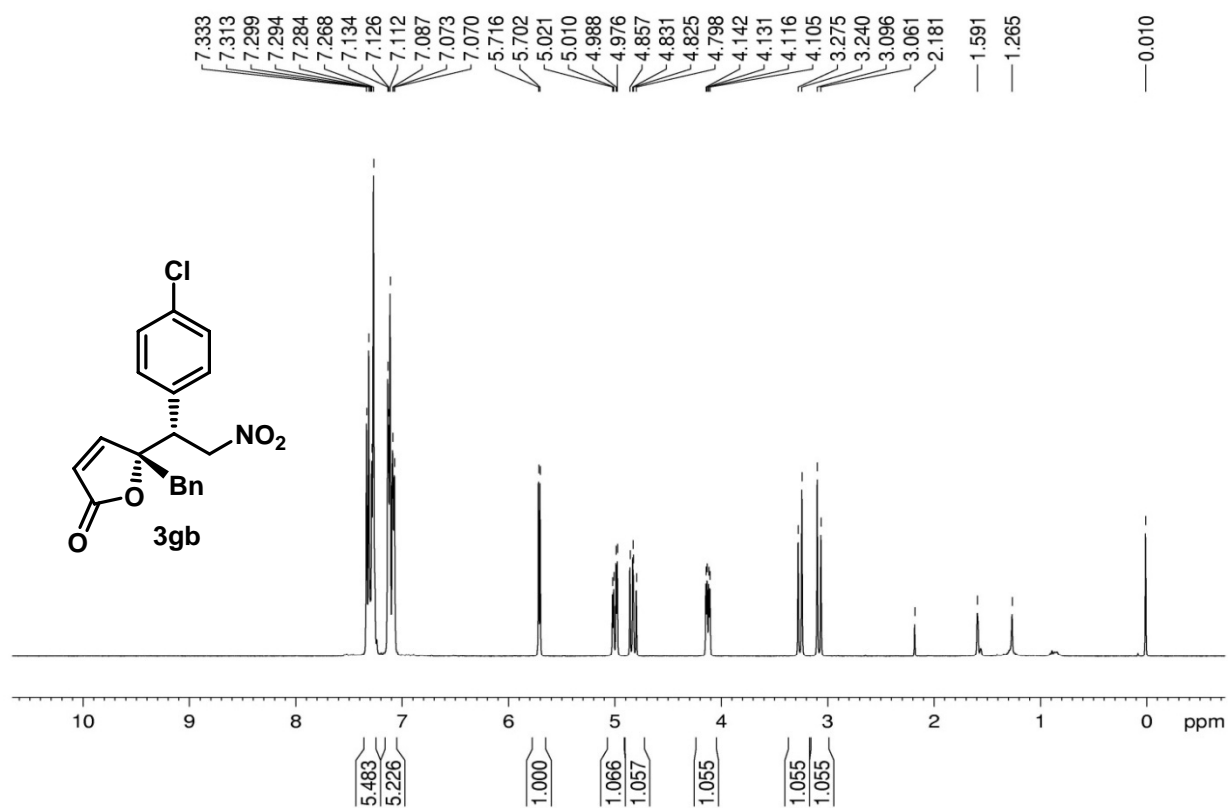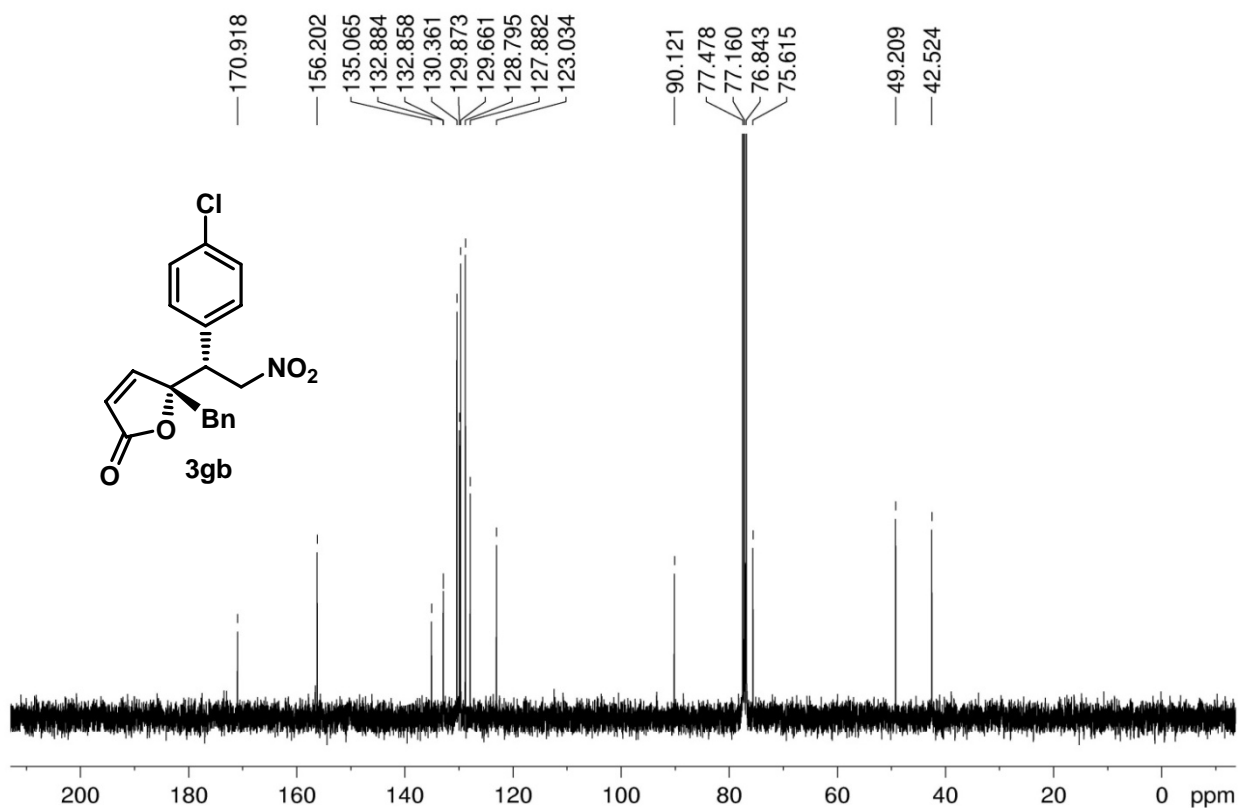

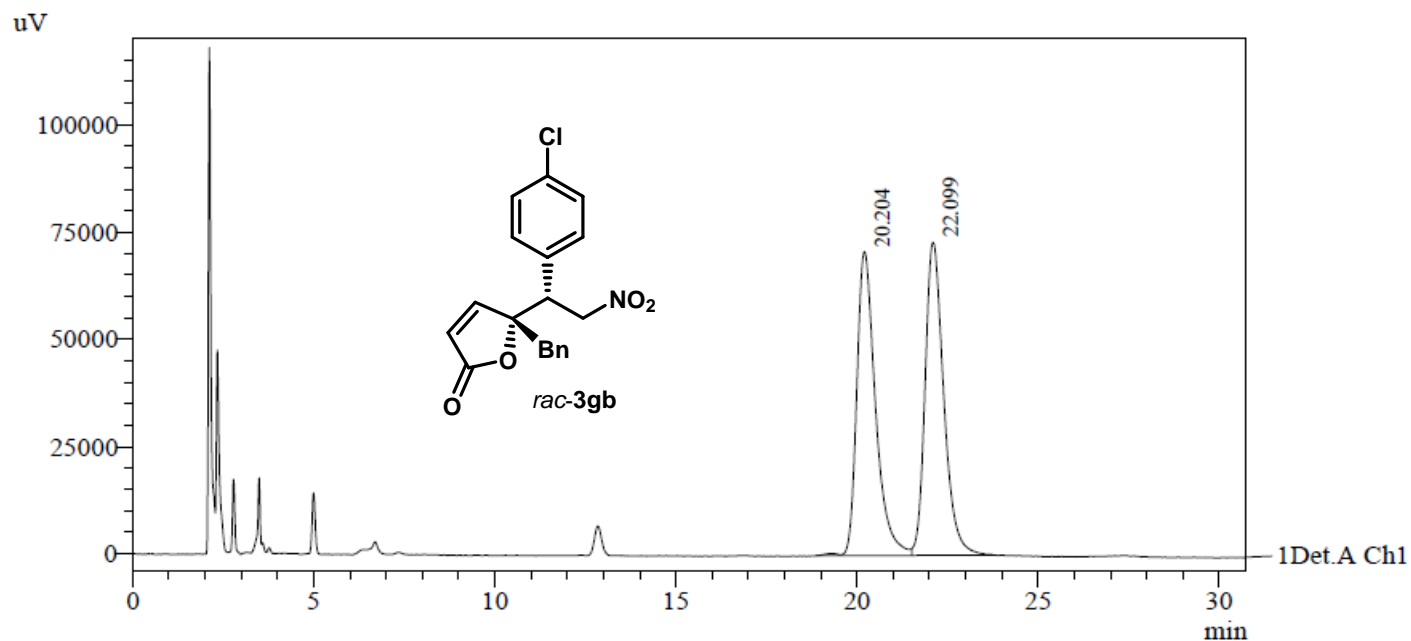

PeakTable

Detector A Ch1 210nm

| Peak# | Ret. Time | Area    | Area %  |
|-------|-----------|---------|---------|
| 1     | 20.204    | 2550699 | 49.466  |
| 2     | 22.099    | 2605787 | 50.534  |
| Total |           | 5156486 | 100.000 |

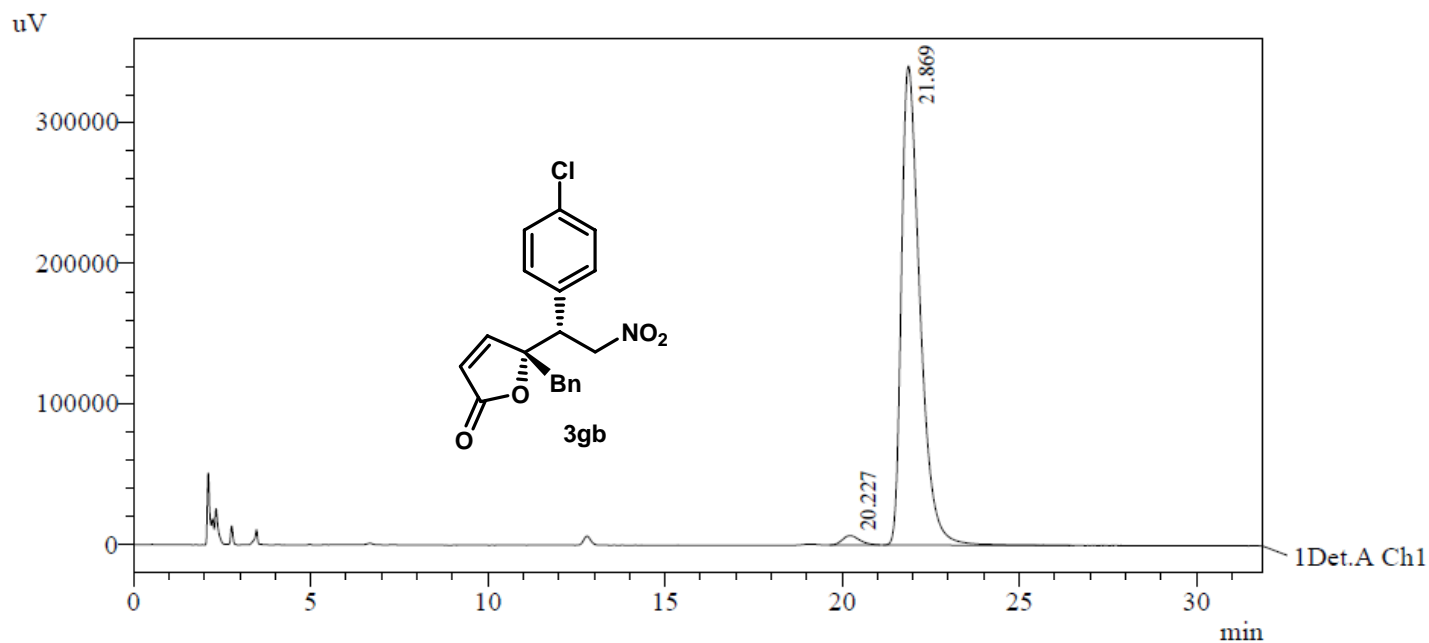

PeakTable

Detector A Ch1 210nm

| Peak# | Ret. Time | Area     | Area %  |
|-------|-----------|----------|---------|
| 1     | 20.227    | 227313   | 1.800   |
| 2     | 21.869    | 12399509 | 98.200  |
| Total |           | 12626822 | 100.000 |

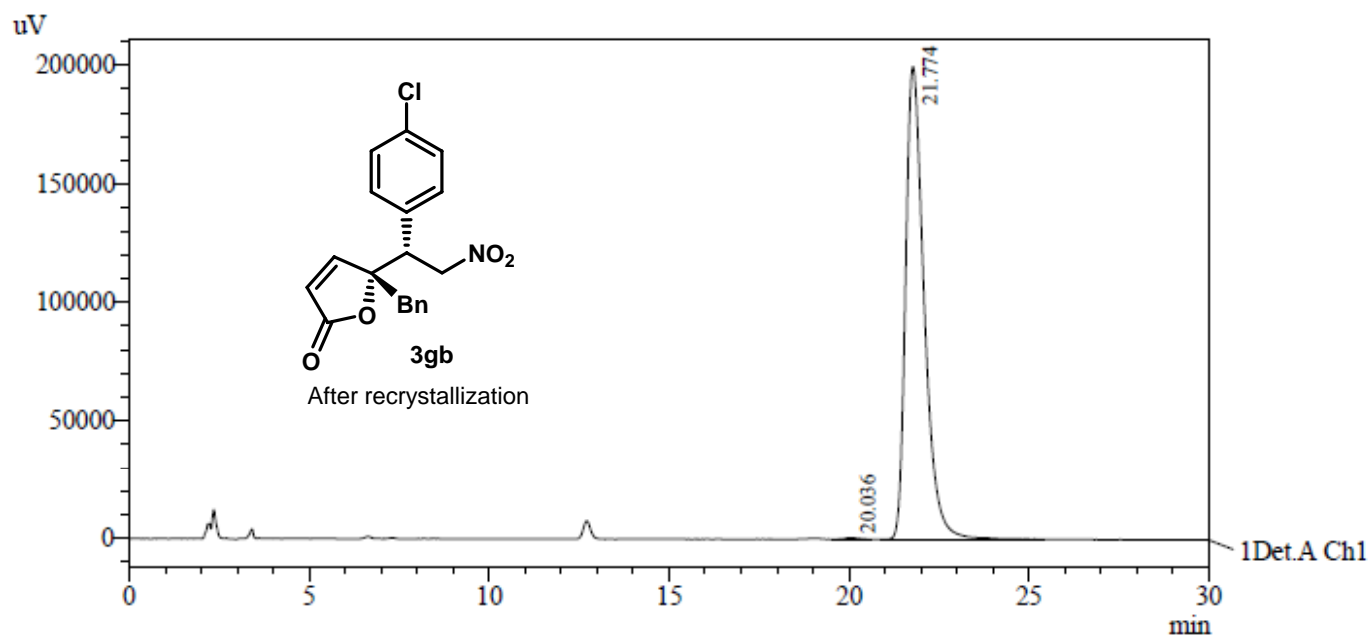

PeakTable

Detector A Ch1 210nm

| Peak# | Ret. Time | Area    | Area %  |
|-------|-----------|---------|---------|
| 1     | 20.036    | 14488   | 0.202   |
| 2     | 21.774    | 7171712 | 99.798  |
| Total |           | 7186200 | 100.000 |

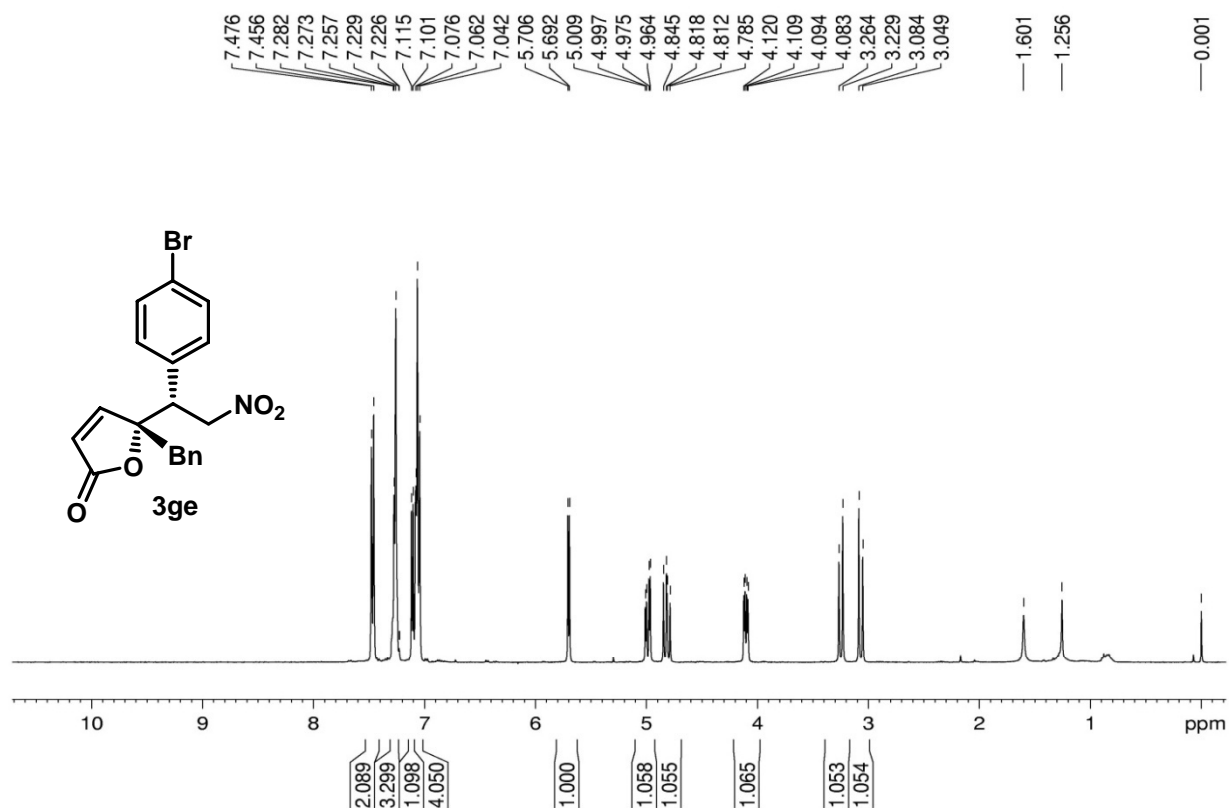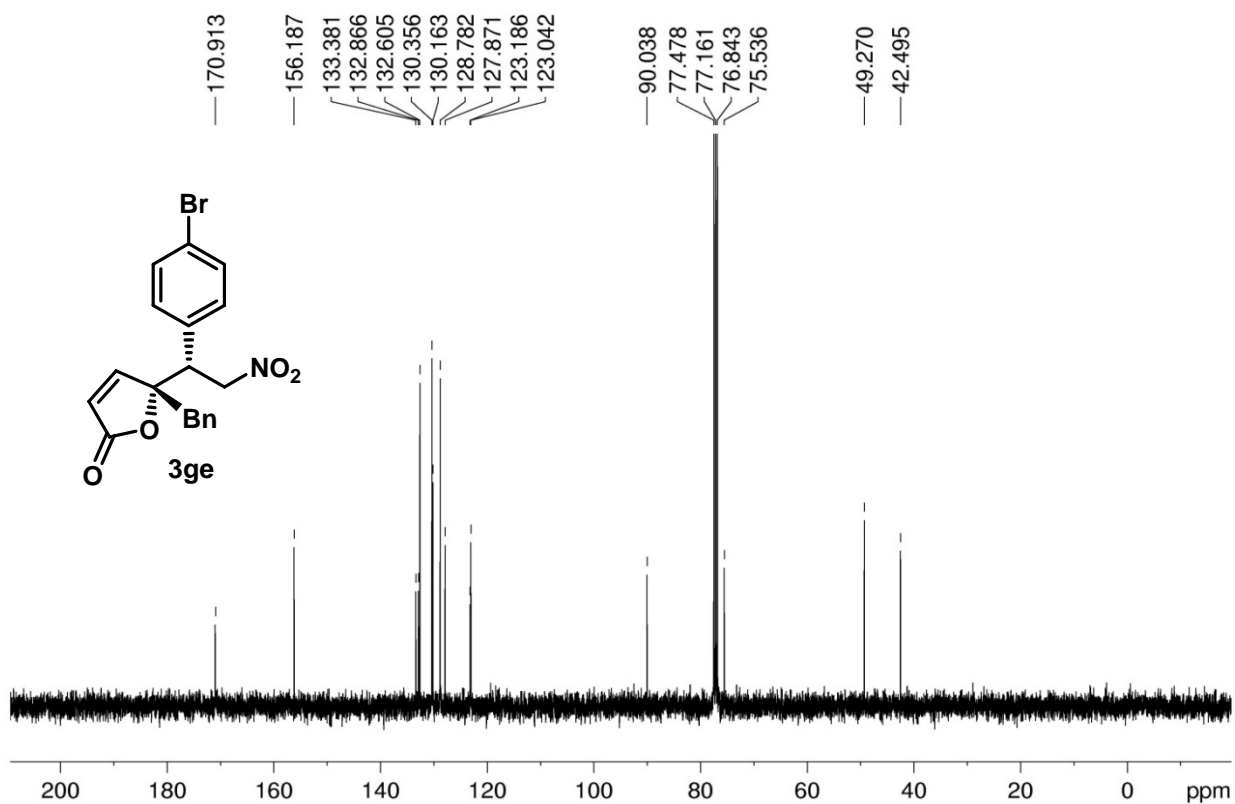

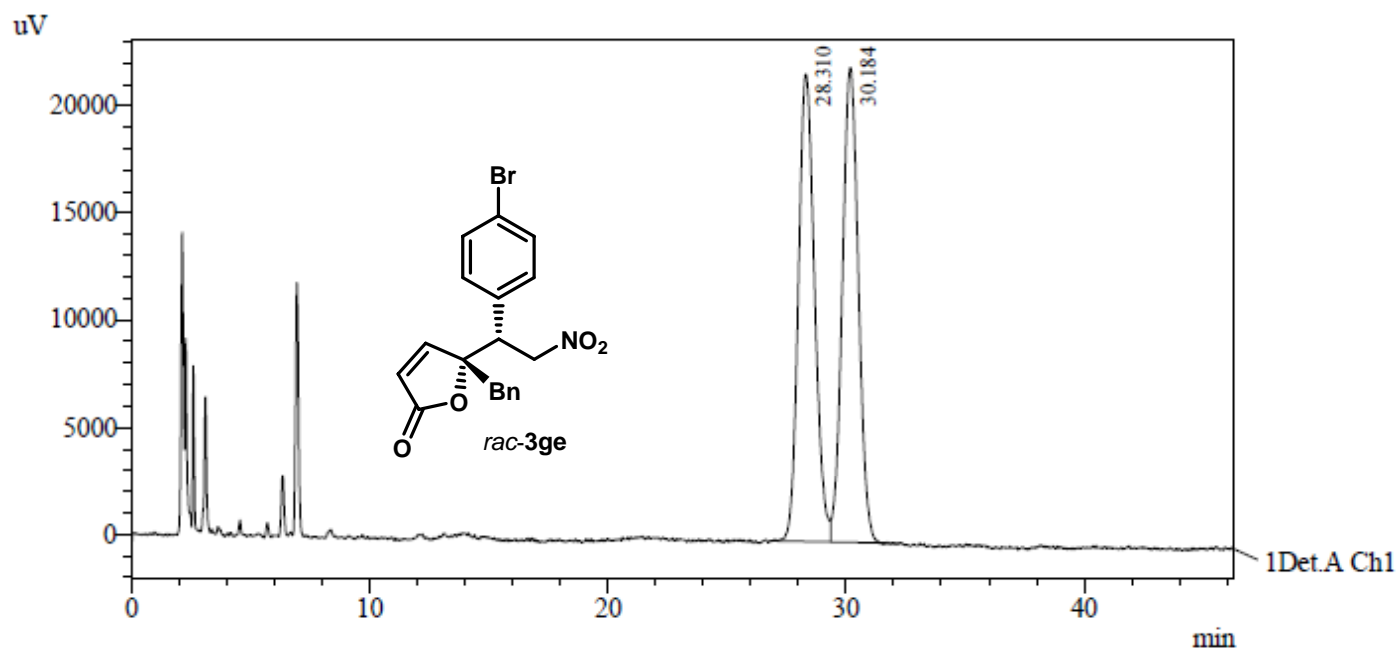

PeakTable

Detector A Ch1 210nm

| Peak# | Ret. Time | Area    | Area %  |
|-------|-----------|---------|---------|
| 1     | 28.310    | 1031911 | 49.915  |
| 2     | 30.184    | 1035440 | 50.085  |
| Total |           | 2067351 | 100.000 |

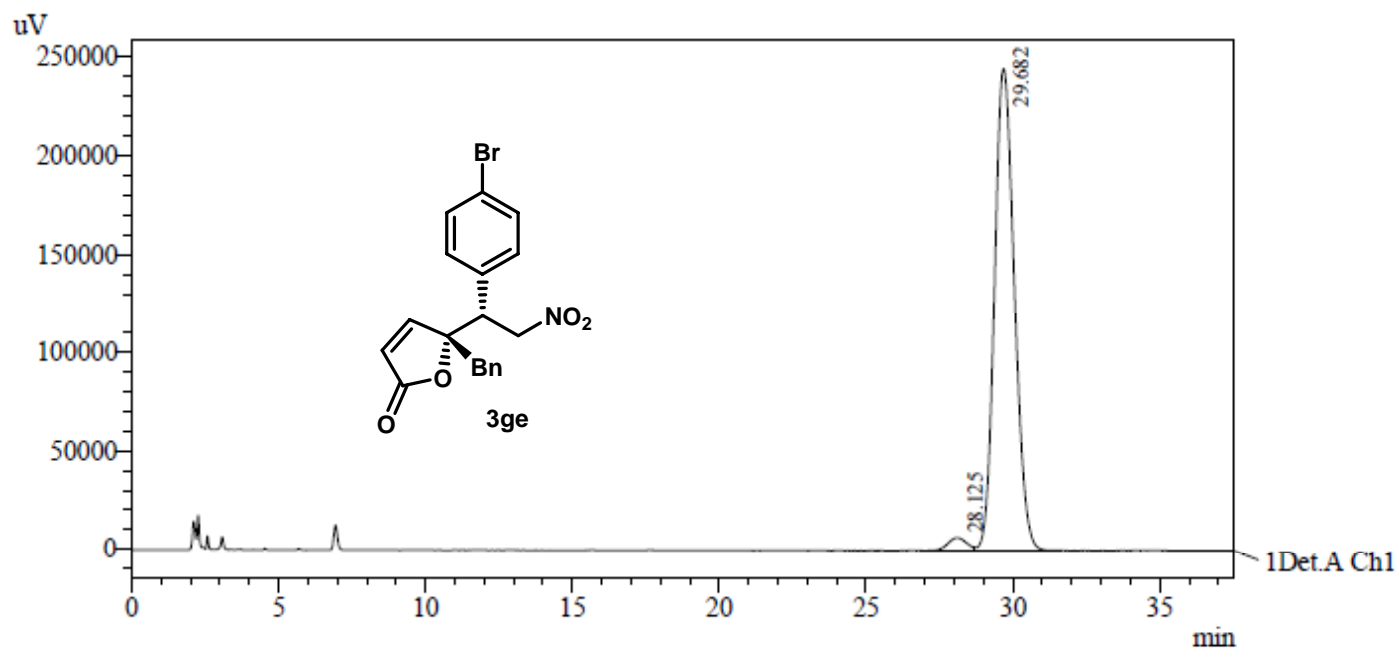

PeakTable

Detector A Ch1 210nm

| Peak# | Ret. Time | Area     | Area %  |
|-------|-----------|----------|---------|
| 1     | 28.125    | 286326   | 2.435   |
| 2     | 29.682    | 11474118 | 97.565  |
| Total |           | 11760444 | 100.000 |

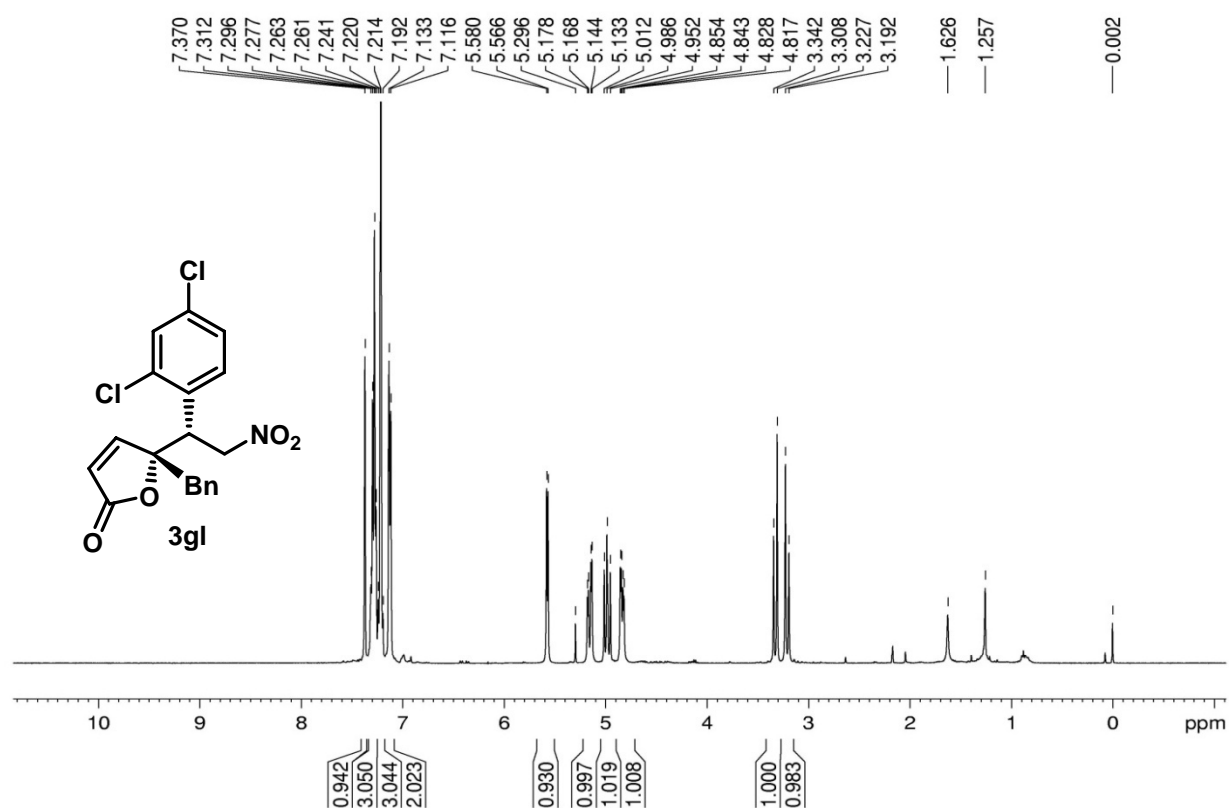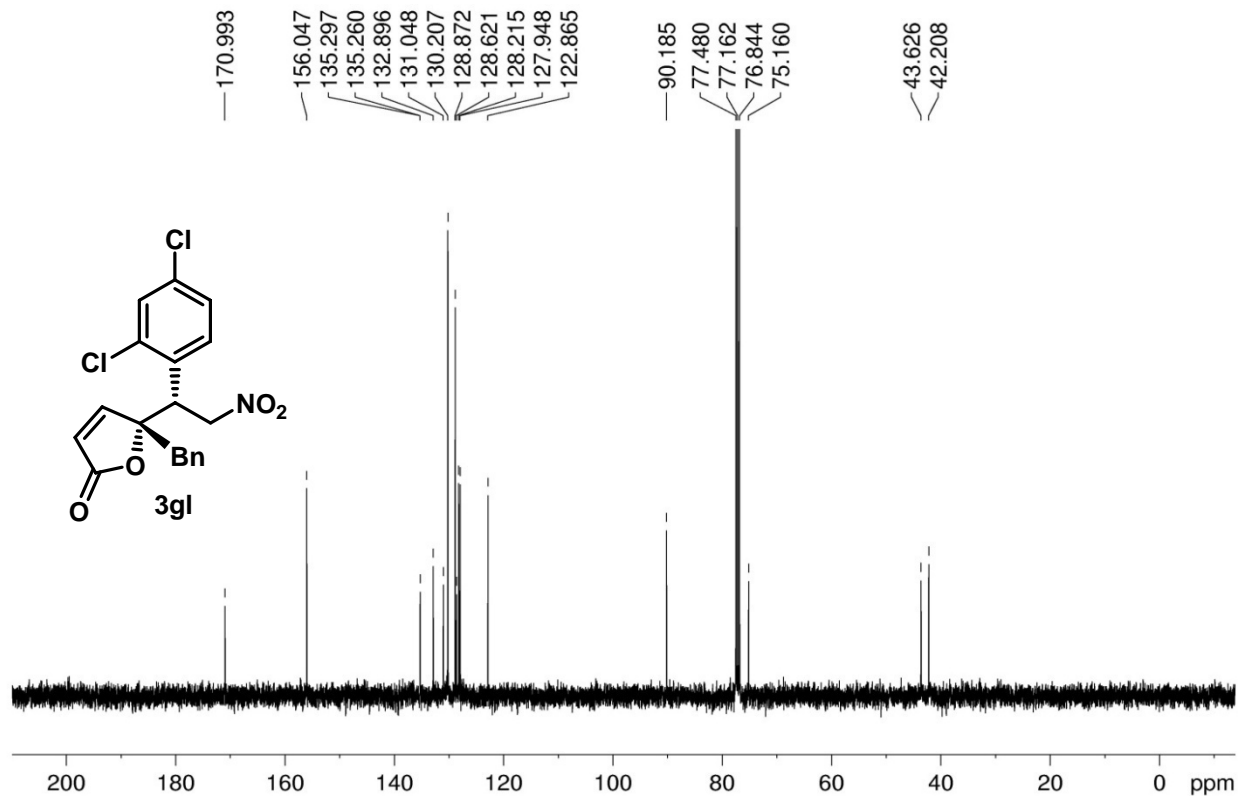

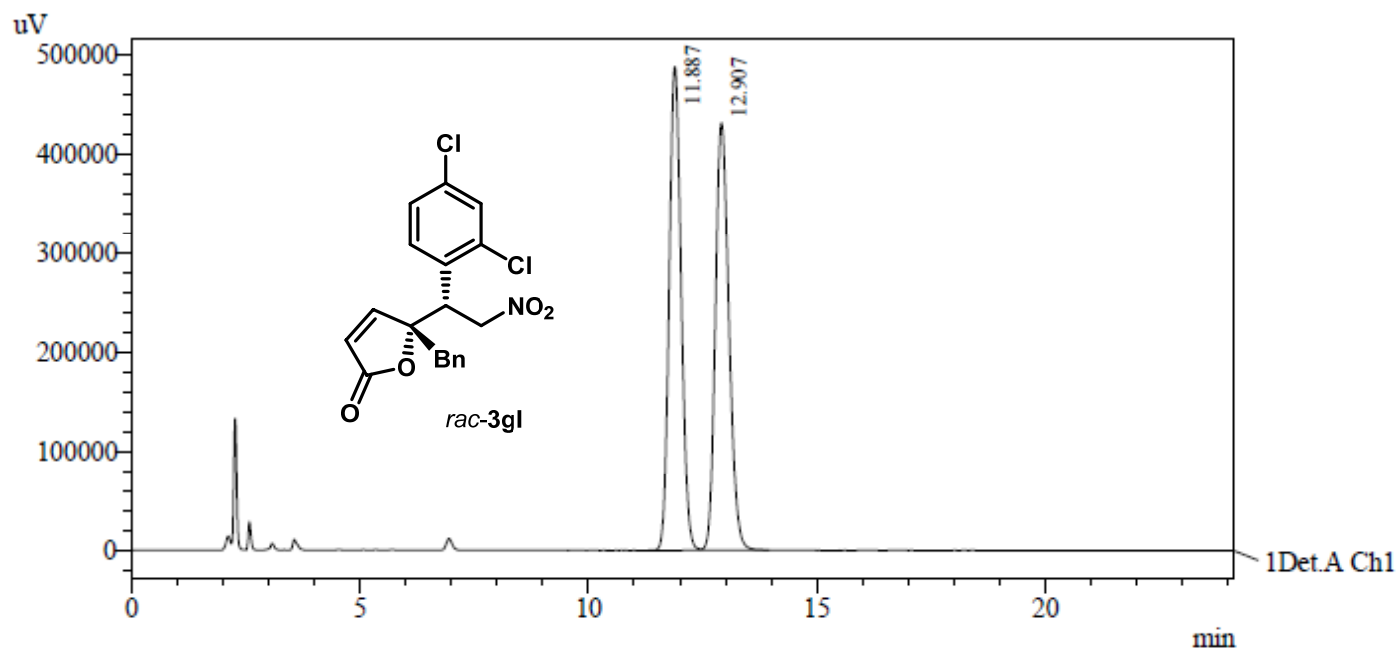

PeakTable

Detector A Ch1 210nm

| Peak# | Ret. Time | Area     | Area %  |
|-------|-----------|----------|---------|
| 1     | 11.887    | 8901660  | 49.970  |
| 2     | 12.907    | 8912346  | 50.030  |
| Total |           | 17814006 | 100.000 |

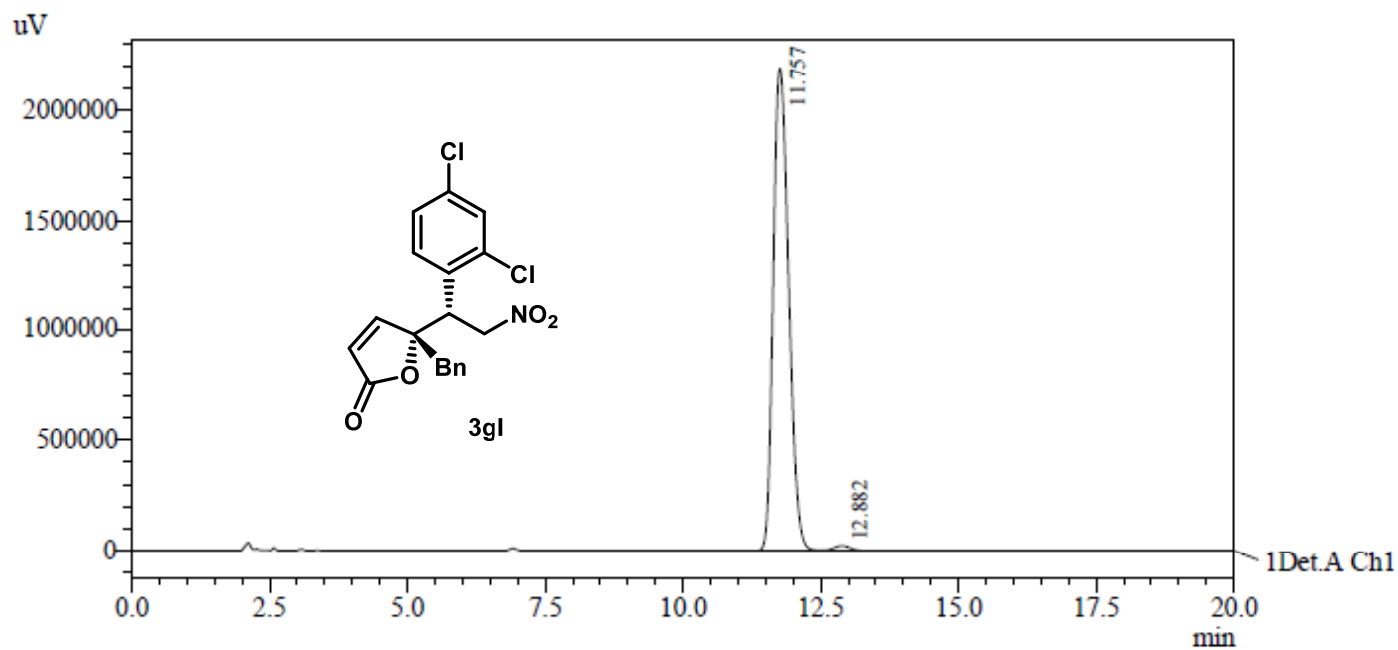

PeakTable

Detector A Ch1 210nm

| Peak# | Ret. Time | Area     | Area %  |
|-------|-----------|----------|---------|
| 1     | 11.757    | 42819947 | 98.832  |
| 2     | 12.882    | 505838   | 1.168   |
| Total |           | 43325785 | 100.000 |

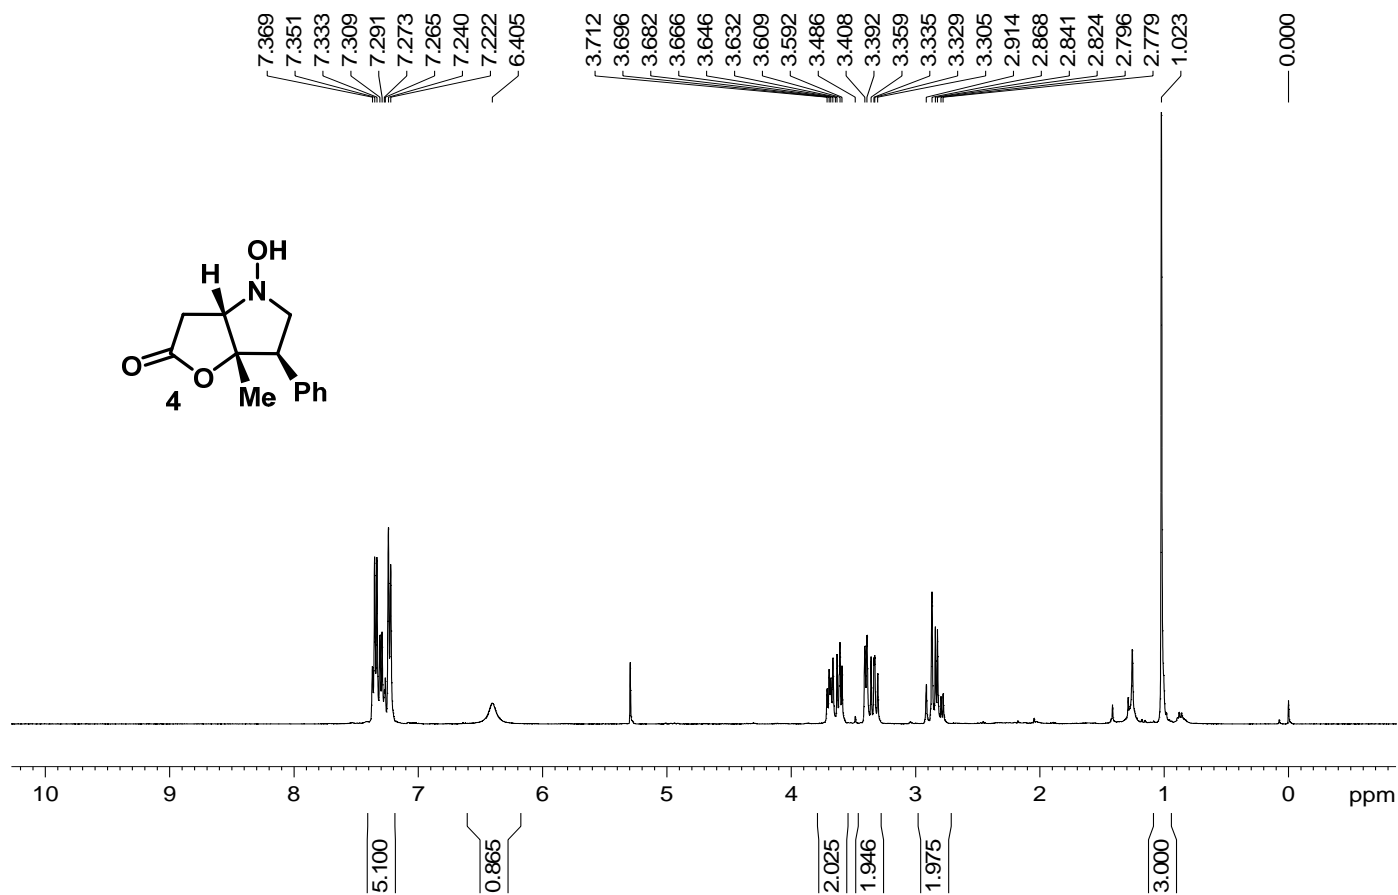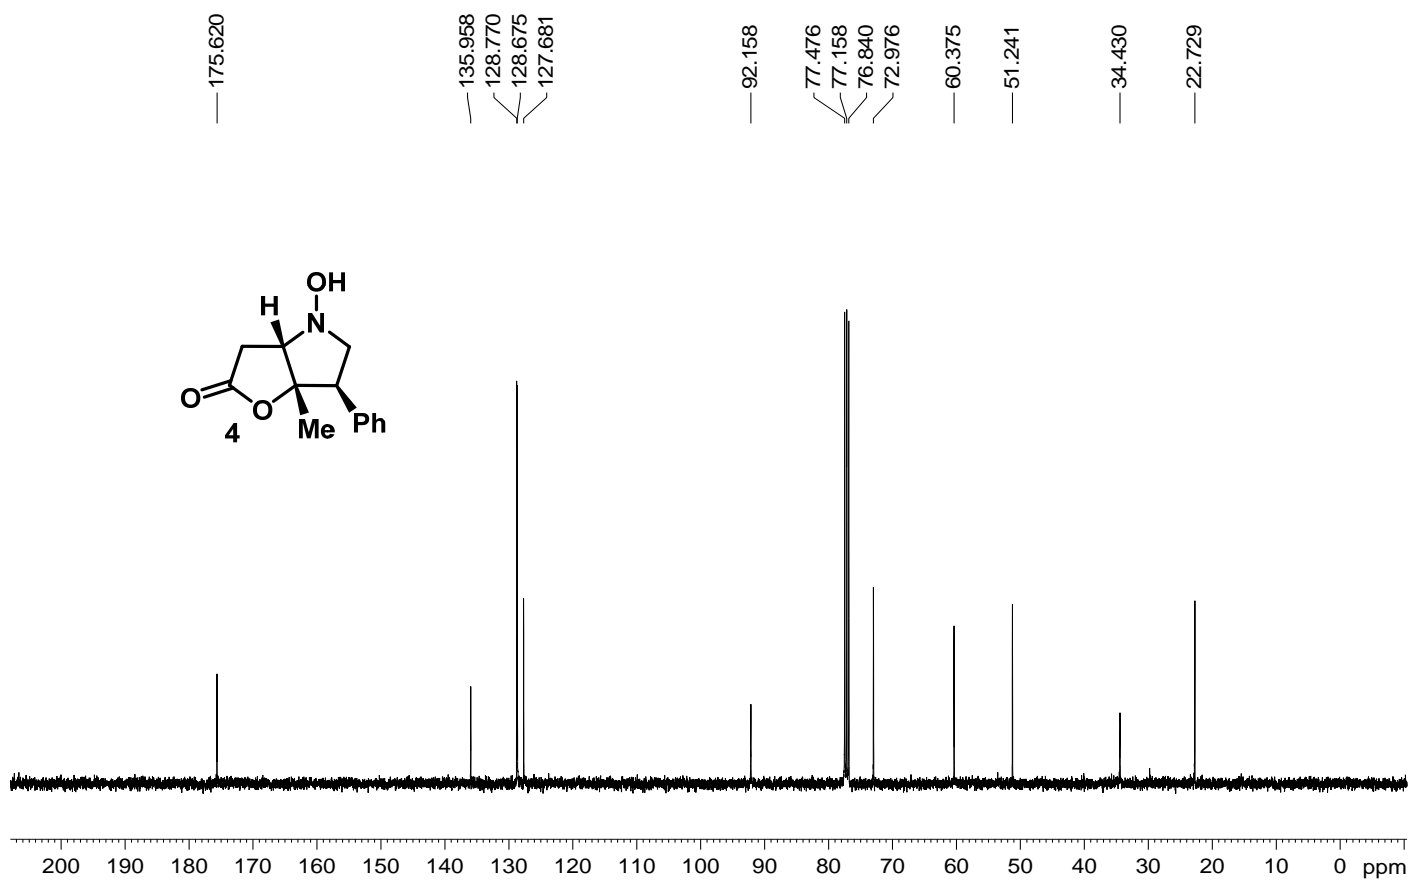

Supplement: c2cc31700a1.zip [file c2cc31700a1.zip]
